# Supplementary material for: Blood cell ratio biomarkers of systemic inflammation in chronic obstructive pulmonary disease
Source: Respir Res. 2026 Mar 18;27:184. doi: 10.1186/s12931-026-03632-3 (PMC13113035; doi:10.1186/s12931-026-03632-3)
Supplement: Supplementary file 2 — Supplementary Material 2. [file 12931_2026_3632_MOESM2_ESM.xlsx]

## Sheet: RNAseq_NLR
e-Table 2: RNA-seq analysis of NLR
ensemble	logFC	AveExpr	t	P.Value	adj.P.Val	B	symbol
ENSG00000003402	0.148175	9.74523	54.4344	0	0	1083.75	CFLAR
ENSG00000005893	0.158066	8.16069	44.1544	0	0	776.707	LAMP2
ENSG00000006652	0.166759	6.71192	45.3823	0	0	812.547	IFRD1
ENSG00000008294	0.119333	7.69431	43.5061	0	0	757.901	SPAG9
ENSG00000011198	0.209132	7.19895	45.8224	0	0	825.469	ABHD5
ENSG00000012779	0.182842	7.65362	44.4947	0	0	786.61	ALOX5
ENSG00000018280	0.22766	7.46754	43.557	0	0	759.379	SLC11A1
ENSG00000021355	0.135268	6.97384	42.8657	0	0	739.415	SERPINB1
ENSG00000025039	0.156835	4.70858	42.6419	0	0	732.976	RRAGD
ENSG00000027075	-0.12132	7.42108	-48.1234	0	0	893.552	PRKCH
ENSG00000039319	0.136083	7.06864	43.0404	0	0	744.448	ZFYVE16
ENSG00000058799	0.111384	4.7378	42.8935	0	0	740.213	YIPF1
ENSG00000059377	0.164745	7.47477	47.6434	0	0	879.281	TBXAS1
ENSG00000059728	0.221223	9.20553	43.7877	0	0	766.064	MXD1
ENSG00000062716	0.168779	8.55173	54.6185	0	0	1089.38	VMP1
ENSG00000065615	0.132404	7.06867	50.6366	0	0	968.804	CYB5R4
ENSG00000065675	-0.140535	5.7049	-46.5905	0	0	848.095	PRKCQ
ENSG00000066933	-0.0954572	6.13735	-44.7563	0	0	794.238	MYO9A
ENSG00000067082	0.0972522	8.23991	45.1048	0	0	804.425	KLF6
ENSG00000072858	-0.145239	5.06258	-46.9143	0	0	857.652	SIDT1
ENSG00000073849	-0.109438	6.82711	-43.2527	0	0	750.578	ST6GAL1
ENSG00000073921	0.126883	9.09266	42.9297	0	0	741.273	PICALM
ENSG00000076685	0.139279	7.40793	49.019	0	0	920.275	NT5C2
ENSG00000078618	0.114697	7.51366	48.4102	0	0	902.097	NRDC
ENSG00000079277	0.149371	6.06898	45.5721	0	0	818.11	MKNK1
ENSG00000080815	0.106126	7.28675	45.1759	0	0	806.499	PSEN1
ENSG00000082512	-0.144368	5.95691	-49.5884	0	0	937.311	TRAF5
ENSG00000083223	0.14011	8.37138	45.1622	0	0	806.105	ZCCHC6
ENSG00000083720	-0.142308	4.45602	-45.2224	0	0	807.836	OXCT1
ENSG00000084110	0.221983	6.09822	47.6229	0	0	878.67	HAL
ENSG00000085511	-0.0955471	5.57754	-45.5913	0	0	818.681	MAP3K4
ENSG00000085788	-0.122996	5.34858	-51.7668	0	0	1002.86	DDHD2
ENSG00000089775	-0.127748	5.73869	-43.2541	0	0	750.626	ZBTB25
ENSG00000090376	0.207834	7.34533	43.9422	0	0	770.541	IRAK3
ENSG00000091317	0.150113	8.41957	43.8657	0	0	768.324	CMTM6
ENSG00000096063	0.162504	6.26512	44.6097	0	0	789.952	SRPK1
ENSG00000097033	0.123385	7.21239	45.4413	0	0	814.277	SH3GLB1
ENSG00000100485	0.145847	6.96071	46.7389	0	0	852.48	SOS2
ENSG00000100504	0.235861	8.06834	44.8645	0	0	797.4	PYGL
ENSG00000101150	0.129336	6.62767	43.672	0	0	762.698	TPD52L2
ENSG00000101265	0.169726	9.63365	46.3583	0	0	841.24	RASSF2
ENSG00000101916	0.192069	7.83858	47.2063	0	0	866.312	TLR8
ENSG00000102218	0.150134	6.39727	47.5612	0	0	876.837	RP2
ENSG00000103047	-0.0821079	5.1071	-42.7124	0	0	735.021	TANGO6
ENSG00000103569	0.256839	8.9453	47.2233	0	0	866.807	AQP9
ENSG00000104763	0.139096	8.27253	43.2498	0	0	750.499	ASAH1
ENSG00000105835	0.238771	11.4453	45.6587	0	0	820.613	NAMPT
ENSG00000106780	0.206868	7.96031	45.1086	0	0	804.535	MEGF9
ENSG00000107679	-0.145807	5.92305	-47.3831	0	0	871.551	PLEKHA1
ENSG00000107738	0.174011	8.52598	43.0197	0	0	743.864	C10orf54
ENSG00000109381	0.0975423	6.8822	48.6414	0	0	908.993	ELF2
ENSG00000109466	0.199378	5.8781	55.9827	0	0	1130.99	KLHL2
ENSG00000109743	0.184261	5.75908	48.0916	0	0	892.606	BST1
ENSG00000110422	0.117748	8.32322	43.5867	0	0	760.237	HIPK3
ENSG00000110931	0.145471	6.30156	44.169	0	0	777.121	CAMKK2
ENSG00000111052	0.204331	5.94147	43.9771	0	0	771.547	LIN7A
ENSG00000111371	-0.113635	8.20611	-49.6077	0	0	937.898	SLC38A1
ENSG00000111913	0.124722	9.6956	43.2444	0	0	750.349	FAM65B
ENSG00000112062	0.170186	8.16158	50.0523	0	0	951.232	MAPK14
ENSG00000113263	-0.142386	7.60158	-51.3948	0	0	991.651	ITK
ENSG00000113269	0.146757	7.51396	47.138	0	0	864.29	RNF130
ENSG00000113648	0.102359	8.36364	45.0221	0	0	802.006	H2AFY
ENSG00000113719	0.173045	7.30432	46.1046	0	0	833.769	ERGIC1
ENSG00000113916	0.247965	7.36533	45.5256	0	0	816.753	BCL6
ENSG00000114268	0.199431	5.85118	45.9576	0	0	829.44	PFKFB4
ENSG00000114316	0.113203	7.17671	48.478	0	0	904.12	USP4
ENSG00000115271	0.237158	8.47566	47.3698	0	0	871.156	GCA
ENSG00000115365	-0.120011	4.9677	-43.6851	0	0	763.09	LANCL1
ENSG00000115561	0.0850313	6.38392	44.3328	0	0	781.881	CHMP3
ENSG00000115590	0.315096	5.74918	54.3284	0	0	1080.57	IL1R2
ENSG00000115828	0.246343	6.44666	46.2547	0	0	838.19	QPCT
ENSG00000116701	0.178086	9.51366	45.1534	0	0	805.843	NCF2
ENSG00000116793	0.119714	4.50449	44.5168	0	0	787.248	PHTF1
ENSG00000116984	-0.0986169	6.53401	-46.3124	0	0	839.893	MTR
ENSG00000116991	0.263314	5.5807	44.7342	0	0	793.589	SIPA1L2
ENSG00000117020	-0.133342	5.97254	-43.1597	0	0	747.901	AKT3
ENSG00000117151	0.160319	6.47655	43.2108	0	0	749.363	CTBS
ENSG00000118217	0.117386	7.5093	45.861	0	0	826.602	ATF6
ENSG00000118564	0.152767	8.87596	45.1231	0	0	804.962	FBXL5
ENSG00000118922	-0.15599	7.02013	-56.4338	0	0	1144.75	KLF12
ENSG00000119285	-0.108014	6.06443	-47.6085	0	0	878.244	HEATR1
ENSG00000119401	-0.143441	3.6157	-46.4367	0	0	843.406	TRIM32
ENSG00000119535	0.217129	9.83369	44.2067	0	0	778.227	CSF3R
ENSG00000119979	0.115763	5.9695	43.7414	0	0	764.703	FAM45A
ENSG00000120129	0.223914	7.36145	44.6599	0	0	791.427	DUSP1
ENSG00000120800	-0.124699	4.90086	-44.8413	0	0	796.717	UTP20
ENSG00000120910	-0.140735	5.16458	-47.0028	0	0	860.275	PPP3CC
ENSG00000121060	0.186925	7.56433	44.07	0	0	774.253	TRIM25
ENSG00000121316	0.200777	7.72075	44.5891	0	0	789.362	PLBD1
ENSG00000122188	-0.170877	4.3935	-50.0083	0	0	949.811	LAX1
ENSG00000122224	-0.161091	5.08198	-51.2148	0	0	986.167	LY9
ENSG00000123684	0.127961	7.77775	46.429	0	0	843.33	LPGAT1
ENSG00000123700	0.228633	7.09506	45.2569	0	0	808.877	KCNJ2
ENSG00000123836	0.187129	4.56855	47.2816	0	0	868.546	PFKFB2
ENSG00000124177	-0.0868591	6.66129	-43.735	0	0	764.528	CHD6
ENSG00000124181	-0.142669	6.39977	-44.4284	0	0	784.679	PLCG1
ENSG00000124203	-0.147939	5.71826	-43.8209	0	0	767.028	ZNF831
ENSG00000125735	0.152132	5.55906	43.9159	0	0	769.765	TNFSF14
ENSG00000127152	-0.155996	6.86663	-49.7036	0	0	940.768	BCL11B
ENSG00000127334	-0.120396	7.25416	-48.7436	0	0	912.046	DYRK2
ENSG00000128594	0.217325	5.37027	42.9957	0	0	743.158	LRRC4
ENSG00000130449	0.10482	5.69321	43.3282	0	0	752.747	ZSWIM6
ENSG00000130684	-0.109594	4.93494	-43.3495	0	0	753.383	ZNF337
ENSG00000130703	0.128076	6.57533	43.721	0	0	764.117	OSBPL2
ENSG00000131389	0.185203	8.25296	42.9136	0	0	740.807	SLC6A6
ENSG00000132155	0.144039	7.73093	50.6587	0	0	969.466	RAF1
ENSG00000132300	-0.0906232	6.18779	-43.1103	0	0	746.469	PTCD3
ENSG00000132334	0.127029	7.88011	43.1072	0	0	746.381	PTPRE
ENSG00000132405	0.143622	7.35009	43.7719	0	0	765.597	TBC1D14
ENSG00000132825	0.135678	5.16079	51.2261	0	0	986.566	PPP1R3D
ENSG00000133318	0.172424	6.76657	47.2346	0	0	867.151	RTN3
ENSG00000134686	0.236631	6.34133	43.0439	0	0	744.551	PHC2
ENSG00000134698	0.146561	7.85968	43.7574	0	0	765.182	AGO4
ENSG00000134759	-0.0949199	5.82371	-43.9084	0	0	769.563	ELP2
ENSG00000134830	0.188252	6.6662	43.5562	0	0	759.348	C5AR2
ENSG00000134954	-0.11954	8.62202	-48.9946	0	0	919.544	ETS1
ENSG00000135108	-0.100551	4.98123	-46.0809	0	0	833.067	FBXO21
ENSG00000135334	0.0973116	4.37907	44.1508	0	0	776.598	AKIRIN2
ENSG00000135749	-0.1516	5.47555	-43.8418	0	0	767.633	PCNX2
ENSG00000135766	0.171527	6.91974	44.5764	0	0	788.986	EGLN1
ENSG00000135905	-0.103625	7.93735	-48.2702	0	0	897.925	DOCK10
ENSG00000136040	0.204508	9.05523	47.3134	0	0	869.48	PLXNC1
ENSG00000136156	0.153455	10.0219	42.7703	0	0	736.687	ITM2B
ENSG00000136404	0.15694	4.67215	43.6401	0	0	761.774	TM6SF1
ENSG00000136869	0.209781	9.02137	49.061	0	0	921.514	TLR4
ENSG00000137393	0.159435	6.50393	43.9204	0	0	769.902	RNF144B
ENSG00000137462	0.228435	8.47445	47.5207	0	0	875.633	TLR2
ENSG00000137575	0.18143	8.91624	43.3898	0	0	754.547	SDCBP
ENSG00000138185	0.190213	7.61314	47.759	0	0	882.715	ENTPD1
ENSG00000138434	0.11184	6.81473	45.9294	0	0	828.61	SSFA2
ENSG00000139132	0.177525	6.20036	47.4225	0	0	872.721	FGD4
ENSG00000139178	0.155771	5.2781	45.6033	0	0	819.027	C1RL
ENSG00000140044	0.164308	4.34978	45.9587	0	0	829.475	JDP2
ENSG00000140262	-0.0718229	5.93167	-44.8803	0	0	797.858	TCF12
ENSG00000140563	0.164475	7.88757	42.6453	0	0	733.086	MCTP2
ENSG00000141293	-0.167056	3.91852	-45.0363	0	0	802.337	SKAP1
ENSG00000142405	0.195551	6.78165	43.5669	0	0	759.658	NLRP12
ENSG00000143207	0.119327	7.21812	47.3015	0	0	869.134	RFWD2
ENSG00000143226	0.213828	9.68601	47.4799	0	0	874.409	FCGR2A
ENSG00000143384	0.136435	10.5828	49.3559	0	0	930.314	MCL1
ENSG00000143815	0.137941	8.00985	42.6932	0	0	734.463	LBR
ENSG00000144118	0.180837	6.77883	45.7938	0	0	824.625	RALB
ENSG00000144909	0.111768	6.24363	46.4272	0	0	843.274	OSBPL11
ENSG00000145332	0.124923	5.32483	44.3283	0	0	781.753	KLHL8
ENSG00000145375	-0.137053	4.777	-52.5391	0	0	1026.17	SPATA5
ENSG00000145996	-0.0974141	4.87672	-44.3175	0	0	781.45	CDKAL1
ENSG00000147138	-0.168219	6.21863	-46.1384	0	0	834.766	GPR174
ENSG00000148572	0.18302	6.09998	47.7843	0	0	883.464	NRBF2
ENSG00000148841	0.165127	6.63733	44.6265	0	0	790.446	ITPRIP
ENSG00000150403	0.126318	5.43736	46.6987	0	0	851.289	TMCO3
ENSG00000151726	0.295457	9.60291	47.6844	0	0	880.471	ACSL1
ENSG00000151948	0.21253	6.23678	44.1884	0	0	777.688	GLT1D1
ENSG00000152213	0.169472	5.63211	56.2096	0	0	1137.92	ARL11
ENSG00000153107	-0.0963887	5.90188	-45.8409	0	0	826.014	ANAPC1
ENSG00000153283	-0.144822	6.66267	-47.1476	0	0	864.575	CD96
ENSG00000153310	0.120891	7.79444	47.6353	0	0	879.039	FAM49B
ENSG00000154845	0.170301	7.35121	44.8867	0	0	798.044	PPP4R1
ENSG00000155099	0.174673	5.42843	49.5738	0	0	936.881	TMEM55A
ENSG00000155561	-0.0932905	6.20726	-48.4949	0	0	904.622	NUP205
ENSG00000155744	0.187713	7.67718	43.6835	0	0	763.04	FAM126B
ENSG00000155926	0.14644	8.66773	49.5708	0	0	936.784	SLA
ENSG00000156642	0.108123	5.87973	43.872	0	0	768.492	NPTN
ENSG00000156671	0.099457	6.15276	43.1248	0	0	746.874	SAMD8
ENSG00000157557	0.167514	5.95833	43.7056	0	0	763.671	ETS2
ENSG00000158470	0.199439	6.75831	43.2894	0	0	751.635	B4GALT5
ENSG00000158615	0.0683214	7.4651	44.2867	0	0	780.545	PPP1R15B
ENSG00000159128	0.162548	7.13554	48.171	0	0	894.969	IFNGR2
ENSG00000160593	0.15372	9.55528	47.0184	0	0	860.741	JAML
ENSG00000160712	0.162058	8.51513	42.6803	0	0	734.096	IL6R
ENSG00000161405	-0.158626	7.25155	-47.4893	0	0	874.705	IKZF3
ENSG00000162739	-0.149558	5.54294	-45.5373	0	0	817.097	SLAMF6
ENSG00000163162	0.186453	8.80096	52.6352	0	0	1029.14	RNF149
ENSG00000163235	0.210034	4.71321	45.2287	0	0	808.045	TGFA
ENSG00000163393	0.19253	5.44924	48.0894	0	0	892.541	SLC22A15
ENSG00000163694	0.210568	6.31736	44.7131	0	0	792.972	RBM47
ENSG00000165030	0.202108	5.24144	47.8958	0	0	886.779	NFIL3
ENSG00000165071	0.139343	7.02237	44.6449	0	0	790.983	TMEM71
ENSG00000165879	0.181285	5.93693	46.1494	0	0	835.084	FRAT1
ENSG00000166523	0.262698	5.67701	46.2783	0	0	838.885	CLEC4E
ENSG00000166900	0.200027	7.13138	46.1711	0	0	835.729	STX3
ENSG00000167193	0.103486	5.94036	52.8379	0	0	1035.31	CRK
ENSG00000167984	-0.140058	6.15587	-52.6167	0	0	1028.59	NLRC3
ENSG00000167995	0.206727	5.29661	47.7306	0	0	881.868	BEST1
ENSG00000168421	-0.142482	5.84389	-51.0393	0	0	980.915	RHOH
ENSG00000168769	0.152589	8.57436	42.6712	0	0	733.835	TET2
ENSG00000169180	0.181787	8.73923	44.837	0	0	796.597	XPO6
ENSG00000169826	0.0971775	6.13012	43.0527	0	0	744.796	CSGALNACT2
ENSG00000170871	0.130851	7.52969	47.9582	0	0	888.636	KIAA0232
ENSG00000170989	-0.154735	6.9309	-53.4334	0	0	1053.36	S1PR1
ENSG00000171862	0.160456	9.07375	46.673	0	0	850.531	PTEN
ENSG00000172197	0.101408	5.35805	43.3162	0	0	752.401	MBOAT1
ENSG00000172216	0.170611	5.82859	42.6792	0	0	734.046	CEBPB
ENSG00000172575	-0.153204	6.33117	-54.5692	0	0	1087.88	RASGRP1
ENSG00000172795	0.107894	8.27544	44.0435	0	0	773.484	DCP2
ENSG00000173171	0.152803	5.17926	42.941	0	0	741.579	MTX1
ENSG00000173281	0.221716	7.28473	48.8749	0	0	915.966	PPP1R3B
ENSG00000173334	0.163423	4.9547	44.5543	0	0	788.339	TRIB1
ENSG00000173559	0.172973	9.00213	43.8303	0	0	767.301	NABP1
ENSG00000174125	0.187851	8.50303	48.8275	0	0	914.544	TLR1
ENSG00000174130	0.182902	7.4231	45.5731	0	0	818.146	TLR6
ENSG00000175471	0.153152	6.15029	46.4348	0	0	843.498	MCTP1
ENSG00000175538	0.167892	7.03687	48.0295	0	0	890.758	KCNE3
ENSG00000177125	0.145398	6.7725	50.2973	0	0	958.597	ZBTB34
ENSG00000177272	-0.147409	5.05771	-43.8685	0	0	768.403	KCNA3
ENSG00000177410	0.129546	5.75752	43.9509	0	0	770.781	ZFAS1
ENSG00000179456	0.104552	6.39953	43.8303	0	0	767.283	ZBTB18
ENSG00000180096	-0.148623	5.30886	-44.0859	0	0	774.717	2025-09-01
ENSG00000180509	0.20708	3.50953	43.8558	0	0	768.039	KCNE1
ENSG00000181274	0.193154	7.38994	44.2128	0	0	778.402	FRAT2
ENSG00000182022	0.192729	8.15971	44.0789	0	0	774.513	CHST15
ENSG00000184787	-0.0712442	6.12733	-45.1134	0	0	804.673	UBE2G2
ENSG00000185950	0.194934	4.85556	46.0043	0	0	830.814	IRS2
ENSG00000186205	0.249571	5.09939	46.0896	0	0	833.325	2025-03-01
ENSG00000186431	0.234211	4.81696	47.4829	0	0	874.514	FCAR
ENSG00000188042	-0.130546	6.93777	-45.0984	0	0	804.235	ARL4C
ENSG00000188315	0.155094	4.65066	45.9115	0	0	828.085	C3orf62
ENSG00000188895	0.169527	7.77414	49.169	0	0	924.758	MSL1
ENSG00000196305	-0.104283	6.13305	-49.2823	0	0	928.149	IARS
ENSG00000196405	-0.127635	7.5096	-47.4978	0	0	874.958	EVL
ENSG00000196954	0.14609	7.84714	46.6531	0	0	849.947	CASP4
ENSG00000197208	0.214408	4.83164	43.5299	0	0	758.586	SLC22A4
ENSG00000197329	0.171933	7.5021	43.9866	0	0	771.829	PELI1
ENSG00000198189	0.145853	7.37839	42.726	0	0	735.401	HSD17B11
ENSG00000198223	0.177219	6.00457	48.1283	0	0	893.698	CSF2RA
ENSG00000198585	0.119889	5.66994	43.5203	0	0	758.302	NUDT16
ENSG00000198589	-0.102233	7.96208	-48.4129	0	0	902.178	LRBA
ENSG00000206344	0.194319	6.79591	47.9582	0	0	888.636	HCG27
ENSG00000213903	0.170788	5.404	45.8385	0	0	825.935	LTB4R
ENSG00000217128	0.141458	7.04024	44.0335	0	0	773.185	FNIP1
ENSG00000221869	0.20737	5.5539	42.7824	0	0	737.018	CEBPD
ENSG00000238160	0.190985	4.41136	43.0136	0	0	743.678
ENSG00000243646	0.132534	6.27565	45.6118	0	0	819.274	IL10RB
ENSG00000254470	0.195192	6.51796	43.9282	0	0	770.13	AP5B1
ENSG00000257093	-0.122356	6.6161	-50.9967	0	0	979.643	KIAA1147
ENSG00000260916	0.155399	7.75548	42.9195	0	0	740.972	CCPG1
ENSG00000274536	0.190934	8.91551	51.8558	0	0	1005.55	MIR223
ENSG00000277734	-0.168437	7.18602	-45.6026	0	0	819.013	TRAC
ENSG00000278600	0.15973	5.28191	44.2641	0	0	779.884
ENSG00000284930	0.195487	3.7113	46.6294	0	0	849.247	NA
ENSG00000108582	0.193201	8.14429	42.5767	0	0	731.118	CPD
ENSG00000184014	0.149641	7.96257	42.6002	0	0	731.791	DENND5A
ENSG00000110934	0.0846722	8.05156	42.5562	0	0	730.524	BIN2
ENSG00000215114	0.168016	6.44577	42.5445	0	0	730.18	UBXN2B
ENSG00000176225	-0.110562	5.33633	-42.5248	0	0	729.632	RTTN
ENSG00000136867	0.187277	6.3683	42.446	0	0	727.355	SLC31A2
ENSG00000132953	-0.0943717	5.7216	-42.4274	0	0	726.834	XPO4
ENSG00000068366	0.14142	7.15672	42.4154	0	0	726.478	ACSL4
ENSG00000120594	0.169832	7.47678	42.3971	0	0	725.957	PLXDC2
ENSG00000225873	0.210229	2.51542	42.391	0	0	725.796	LINC00694
ENSG00000042088	-0.099008	4.53199	-42.369	0	0	725.163	TDP1
ENSG00000102921	0.121809	6.51589	42.3215	0	0	723.779	N4BP1
ENSG00000018699	-0.121543	3.96361	-42.3061	0	0	723.331	TTC27
ENSG00000069667	-0.155897	7.59133	-42.302	0	0	723.232	RORA
ENSG00000087157	0.156976	6.54269	42.2706	0	0	722.323	PGS1
ENSG00000104324	0.146442	6.51758	42.2575	0	0	721.947	CPQ
ENSG00000211772	-0.160219	7.15944	-42.2531	0	0	721.834	TRBC2
ENSG00000143119	0.0868342	8.48653	42.23	0	0	721.173	CD53
ENSG00000062282	0.231554	6.76763	42.2105	0	0	720.611	DGAT2
ENSG00000147416	0.14889	8.63667	42.1977	0	0	720.254	ATP6V1B2
ENSG00000196352	0.176839	7.53849	42.1876	0	0	719.958	CD55
ENSG00000109220	0.0985836	4.68067	42.1854	0	0	719.884	CHIC2
ENSG00000228242	0.197578	4.15871	42.1823	0	0	719.804
ENSG00000101084	0.12349	5.92177	42.1418	0	0	718.63	C20orf24
ENSG00000170837	0.195425	3.98137	42.1397	0	0	718.586	GPR27
ENSG00000067182	0.164859	6.17126	42.1201	0	0	718.014	TNFRSF1A
ENSG00000069493	-0.130935	7.51855	-42.1151	0	0	717.879	CLEC2D
ENSG00000138378	-0.142182	6.18357	-42.0945	0	0	717.298	STAT4
ENSG00000162702	0.131971	6.37556	42.0889	0	0	717.121	ZNF281
ENSG00000135828	0.100148	6.34144	42.037	0	0	715.633	RNASEL
ENSG00000145491	0.183816	2.78244	42.0342	0	0	715.581	ROPN1L
ENSG00000113532	0.134246	7.83446	42.0287	0	0	715.411	ST8SIA4
ENSG00000126883	0.105333	6.21195	42.0052	0	0	714.723	NUP214
ENSG00000163625	0.226687	8.06945	42.0041	0	0	714.716	WDFY3
ENSG00000137177	0.173104	6.51128	42.0011	0	0	714.613	KIF13A
ENSG00000163513	0.0877848	8.46736	42.0003	0	0	714.602	TGFBR2
ENSG00000133961	0.162558	6.69163	41.9791	0	0	713.985	NUMB
ENSG00000143515	-0.125457	6.74303	-41.9636	0	0	713.55	ATP8B2
ENSG00000188906	0.197297	10.2894	41.9409	0	0	712.915	LRRK2
ENSG00000088387	-0.140999	6.03437	-41.9309	0	0	712.624	DOCK9
ENSG00000182866	-0.146666	6.85207	-41.906	0	0	711.909	LCK
ENSG00000135049	0.115611	7.62901	41.9038	0	0	711.838	AGTPBP1
ENSG00000140749	0.169404	7.93743	41.9015	0	0	711.78	IGSF6
ENSG00000248323	0.208184	7.6036	41.8983	0	0	711.689	LUCAT1
ENSG00000102580	0.136521	6.80125	41.8903	0	0	711.447	DNAJC3
ENSG00000116044	0.0829761	6.48785	41.8049	0	0	709.001	NFE2L2
ENSG00000138411	0.213379	3.47379	41.773	0	0	708.117	HECW2
ENSG00000154473	-0.0805591	6.18617	-41.7723	0	0	708.087	BUB3
ENSG00000056558	-0.153016	5.29138	-41.7532	0	0	707.558	TRAF1
ENSG00000033327	0.197835	6.1847	41.7169	0	0	706.5	GAB2
ENSG00000285693	0.145945	3.14324	41.6913	0	0	705.792	NA
ENSG00000135414	-0.159447	3.50814	-41.675	0	0	705.245	GDF11
ENSG00000136026	0.176288	5.37076	41.6663	0	0	705.054	CKAP4
ENSG00000070061	-0.0796462	6.13226	-41.6593	0	0	704.867	IKBKAP
ENSG00000101445	-0.134388	5.64312	-41.6445	0	0	704.458	PPP1R16B
ENSG00000144535	-0.104144	4.66589	-41.6438	0	0	704.441	DIS3L2
ENSG00000173110	0.208677	6.87455	41.6436	0	0	704.418	HSPA6
ENSG00000171940	0.0935196	8.19539	41.6113	0	0	703.501	ZNF217
ENSG00000111261	0.240884	4.593	41.5848	0	0	702.742	MANSC1
ENSG00000117174	-0.131893	3.96368	-41.5778	0	0	702.536	ZNHIT6
ENSG00000203710	0.23564	8.02637	41.569	0	0	702.306	CR1
ENSG00000169967	0.122253	8.35726	41.5646	0	0	702.173	MAP3K2
ENSG00000183023	0.194661	6.5799	41.5552	0	0	701.897	SLC8A1
ENSG00000121406	-0.120831	4.14653	-41.5356	0	0	701.347	ZNF549
ENSG00000256751	0.193248	3.38818	41.5226	0	0	700.984	PLBD1-AS1
ENSG00000101493	0.171905	6.54888	41.4749	0	2.78906e-308	699.608	ZNF516
ENSG00000151893	0.111757	7.1378	41.4639	0	3.80602e-308	699.294	CACUL1
ENSG00000163681	0.072782	6.32466	41.4586	0	4.40075e-308	699.135	SLMAP
ENSG00000059804	0.196005	8.3492	41.4524	0	5.23595e-308	698.987	SLC2A3
ENSG00000162777	-0.0917071	6.94394	-41.3973	0	2.50455e-307	697.404	DENND2D
ENSG00000171051	0.226734	9.13516	41.3969	0	2.52459e-307	697.416	FPR1
ENSG00000127954	0.228508	8.60082	41.3937	0	2.75566e-307	697.322	STEAP4
ENSG00000183255	0.101048	7.08872	41.3929	0	2.81397e-307	697.274	PTTG1IP
ENSG00000087253	0.171511	6.79598	41.386	0	3.41618e-307	697.081	LPCAT2
ENSG00000124731	0.22513	7.42116	41.3847	0	3.52978e-307	697.055	TREM1
ENSG00000131724	0.193567	6.88654	41.3522	0	8.87739e-307	696.124	IL13RA1
ENSG00000086730	0.147641	6.78106	41.3311	3.51947e-308	1.61004e-306	695.52	LAT2
ENSG00000169299	0.109652	5.91697	41.3292	3.71444e-308	1.69388e-306	695.458	PGM2
ENSG00000089737	-0.0849663	6.78727	-41.3274	3.91e-308	1.77745e-306	695.418	DDX24
ENSG00000160654	-0.175927	5.13316	-41.3197	4.8648e-308	2.20456e-306	695.224	CD3G
ENSG00000119471	0.150486	5.66917	41.3093	6.5379e-308	2.9535e-306	694.896	HSDL2
ENSG00000166579	0.135983	6.95062	41.3078	6.83326e-308	3.07731e-306	694.857	NDEL1
ENSG00000197622	0.0827015	9.22411	41.2863	1.25938e-307	5.65393e-306	694.266	CDC42SE1
ENSG00000143622	0.118086	6.14688	41.2714	1.92088e-307	8.59698e-306	693.818	RIT1
ENSG00000180953	0.172132	4.19366	41.2483	3.71006e-307	1.65533e-305	693.174	ST20
ENSG00000182670	-0.101225	7.21862	-41.2084	1.15291e-306	5.12814e-305	692.038	TTC3
ENSG00000117335	0.124271	8.85618	41.2025	1.36381e-306	6.0476e-305	691.886	CD46
ENSG00000168461	0.168633	7.4361	41.1717	3.26893e-306	1.44513e-304	691.002	RAB31
ENSG00000133706	-0.0807205	6.57075	-41.1553	5.21004e-306	2.29623e-304	690.531	LARS
ENSG00000174501	-0.136891	6.69277	-41.1551	5.23726e-306	2.30121e-304	690.533	ANKRD36C
ENSG00000174197	-0.0678676	7.22798	-41.1235	1.28522e-305	5.63006e-304	689.623	MGA
ENSG00000188559	0.144267	7.25342	41.1184	1.48488e-305	6.485e-304	689.485	RALGAPA2
ENSG00000144802	0.102316	6.74979	41.1147	1.64575e-305	7.16593e-304	689.373	NFKBIZ
ENSG00000131089	-0.118899	4.18879	-41.1087	1.95175e-305	8.47281e-304	689.229	ARHGEF9
ENSG00000239998	0.182393	6.10949	41.0965	2.76064e-305	1.19484e-303	688.86	LILRA2
ENSG00000159267	-0.139009	3.91347	-41.091	3.22639e-305	1.39226e-303	688.71	HLCS
ENSG00000101019	-0.098271	4.45932	-41.0854	3.78564e-305	1.62873e-303	688.574	UQCC1
ENSG00000170832	0.147525	8.17993	41.0402	1.36493e-304	5.85502e-303	687.28	USP32
ENSG00000113742	0.149569	6.97996	41.0319	1.7265e-304	7.38409e-303	687.032	CPEB4
ENSG00000136371	0.134137	4.34281	40.9565	1.46201e-303	6.23446e-302	684.9	MTHFS
ENSG00000111647	0.120869	6.51708	40.956	1.48499e-303	6.31385e-302	684.875	UHRF1BP1L
ENSG00000100938	0.0907404	5.89539	40.9533	1.60356e-303	6.79795e-302	684.793	GMPR2
ENSG00000091106	0.156549	5.63163	40.9344	2.73757e-303	1.15714e-301	684.263	NLRC4
ENSG00000160588	0.169291	6.80125	40.9266	3.41755e-303	1.44035e-301	684.049	MPZL3
ENSG00000185862	0.143914	7.65902	40.9164	4.55533e-303	1.9143e-301	683.769	EVI2B
ENSG00000169991	-0.138606	4.74904	-40.9156	4.66547e-303	1.9549e-301	683.766	IFFO2
ENSG00000197852	0.199288	6.62066	40.9145	4.81731e-303	2.01269e-301	683.708	FAM212B
ENSG00000013725	-0.174038	5.19896	-40.9039	6.49253e-303	2.70478e-301	683.437	CD6
ENSG00000135976	-0.139778	6.88845	-40.9038	6.52357e-303	2.7099e-301	683.412	ANKRD36
ENSG00000168795	-0.10615	3.80036	-40.8701	1.694e-302	7.01676e-301	682.455	ZBTB5
ENSG00000100365	0.197731	6.5043	40.8671	1.84417e-302	7.61695e-301	682.366	NCF4
ENSG00000163041	0.148463	9.52508	40.8417	3.77969e-302	1.55667e-300	681.674	H3F3A
ENSG00000125304	0.0974186	6.62044	40.8227	6.47058e-302	2.65735e-300	681.103	TM9SF2
ENSG00000100296	0.111126	5.45352	40.8161	7.81261e-302	3.19941e-300	680.912	THOC5
ENSG00000197442	0.105068	7.33154	40.792	1.54437e-301	6.30662e-300	680.241	MAP3K5
ENSG00000183621	0.161215	4.67369	40.7834	1.96939e-301	8.0196e-300	679.997	ZNF438
ENSG00000135655	0.132238	9.03968	40.7818	2.05929e-301	8.36212e-300	679.976	USP15
ENSG00000204160	0.181438	7.23704	40.7779	2.29955e-301	9.31157e-300	679.85	ZDHHC18
ENSG00000006530	-0.108133	4.88239	-40.7727	2.66228e-301	1.07502e-299	679.726	AGK
ENSG00000086848	-0.101282	3.67302	-40.7691	2.94943e-301	1.18766e-299	679.597	ALG9
ENSG00000257335	0.296974	7.85425	40.7646	3.35147e-301	1.3458e-299	679.489	MGAM
ENSG00000100030	0.107609	8.70695	40.764	3.41344e-301	1.36689e-299	679.465	MAPK1
ENSG00000125485	-0.129476	3.41243	-40.7618	3.6247e-301	1.44748e-299	679.347	DDX31
ENSG00000147316	-0.0917912	5.17294	-40.7566	4.20356e-301	1.67401e-299	679.266	MCPH1
ENSG00000059573	-0.135669	3.77366	-40.7332	8.15341e-301	3.23807e-299	678.573	ALDH18A1
ENSG00000120868	0.135239	7.34967	40.7139	1.40627e-300	5.56959e-299	678.038	APAF1
ENSG00000107566	0.11564	4.39312	40.7112	1.51656e-300	5.98999e-299	677.962	ERLIN1
ENSG00000181631	0.177459	6.00833	40.7	2.08362e-300	8.20729e-299	677.638	P2RY13
ENSG00000170836	0.0803176	4.41872	40.6832	3.34915e-300	1.31563e-298	677.174	PPM1D
ENSG00000001461	-0.101796	5.69427	-40.6675	5.22667e-300	2.04761e-298	676.741	NIPAL3
ENSG00000076513	0.110518	7.96033	40.6627	5.97522e-300	2.33453e-298	676.597	ANKRD13A
ENSG00000168615	0.12184	4.81385	40.6499	8.58659e-300	3.34576e-298	676.223	ADAM9
ENSG00000111058	0.220186	4.88609	40.6473	9.2477e-300	3.59367e-298	676.154	ACSS3
ENSG00000171049	0.230208	7.60208	40.6291	1.5466e-299	5.99401e-298	675.654	FPR2
ENSG00000232931	-0.141439	5.58017	-40.6135	2.39817e-299	9.26951e-298	675.226	LINC00342
ENSG00000170892	0.16888	5.66277	40.6062	2.94937e-299	1.13696e-297	674.989	TSEN34
ENSG00000117597	-0.108191	4.81894	-40.5804	6.12229e-299	2.35382e-297	674.295	DIEXF
ENSG00000198736	0.206074	6.81748	40.5664	9.08612e-299	3.48406e-297	673.875	MSRB1
ENSG00000106829	0.0957973	6.71671	40.5436	1.72954e-298	6.61435e-297	673.219	TLE4
ENSG00000010810	-0.0866939	7.2279	-40.5345	2.23552e-298	8.52682e-297	672.97	FYN
ENSG00000198814	0.185053	6.72397	40.5234	3.05974e-298	1.16399e-296	672.659	GK
ENSG00000213390	0.106538	5.7021	40.5174	3.62057e-298	1.37372e-296	672.477	ARHGAP19
ENSG00000164938	0.128755	7.38224	40.5135	4.04156e-298	1.52945e-296	672.382	TP53INP1
ENSG00000141562	0.118087	5.22498	40.5026	5.49615e-298	2.07447e-296	672.064	NARF
ENSG00000197872	0.122973	6.92711	40.5006	5.82083e-298	2.1913e-296	672.012	FAM49A
ENSG00000246263	0.15769	4.44287	40.4923	7.35378e-298	2.7612e-296	671.784	UBR5-AS1
ENSG00000126226	-0.0965377	5.06407	-40.4866	8.63465e-298	3.23374e-296	671.648	PCID2
ENSG00000158201	0.116774	6.12971	40.4789	1.07248e-297	4.00615e-296	671.394	ABHD3
ENSG00000144228	0.138812	7.16824	40.4771	1.12912e-297	4.20684e-296	671.355	SPOPL
ENSG00000138678	0.181196	5.40259	40.4694	1.40155e-297	5.20843e-296	671.131	GPAT3
ENSG00000103994	0.114465	8.28209	40.462	1.72675e-297	6.40049e-296	670.941	ZNF106
ENSG00000145868	0.0823375	6.85692	40.4505	2.39077e-297	8.83912e-296	670.595	FBXO38
ENSG00000151694	0.0934366	5.98605	40.4451	2.78173e-297	1.02583e-295	670.44	ADAM17
ENSG00000135622	-0.164406	2.83627	-40.4244	4.99174e-297	1.83615e-295	669.711	SEMA4F
ENSG00000113368	0.166421	5.64969	40.4206	5.5554e-297	2.0383e-295	669.754	LMNB1
ENSG00000173535	0.214486	8.39589	40.3974	1.06927e-296	3.91325e-295	669.129	TNFRSF10C
ENSG00000163257	-0.0811722	5.41455	-40.3745	2.03707e-296	7.43635e-295	668.483	DCAF16
ENSG00000022277	0.108788	6.7496	40.3657	2.61325e-296	9.51565e-295	668.208	RTFDC1
ENSG00000145907	-0.0654	7.29135	-40.3475	4.36205e-296	1.58437e-294	667.698	G3BP1
ENSG00000165929	-0.149397	7.17698	-40.3445	4.74586e-296	1.71945e-294	667.628	TC2N
ENSG00000120696	0.145489	5.39502	40.335	6.19694e-296	2.23958e-294	667.343	KBTBD7
ENSG00000169891	0.236714	5.84862	40.3012	1.60904e-295	5.80057e-294	666.399	REPS2
ENSG00000204577	0.205846	6.23291	40.2789	3.01363e-295	1.08371e-293	665.771	LILRB3
ENSG00000165115	0.182878	4.94947	40.2644	4.53041e-295	1.6251e-293	665.361	KIF27
ENSG00000011295	-0.0991829	4.56027	-40.2601	5.10964e-295	1.82834e-293	665.277	TTC19
ENSG00000166912	0.115088	6.83863	40.2598	5.16204e-295	1.84253e-293	665.228	MTMR10
ENSG00000087206	0.0973437	5.77313	40.255	5.90997e-295	2.1043e-293	665.086	UIMC1
ENSG00000119682	0.0985119	6.92094	40.2359	1.01116e-294	3.59149e-293	664.556	AREL1
ENSG00000163644	-0.121699	6.1786	-40.2322	1.12125e-294	3.97274e-293	664.474	PPM1K
ENSG00000198604	0.121518	7.56461	40.2308	1.16682e-294	4.12409e-293	664.423	BAZ1A
ENSG00000151690	-0.090588	5.33979	-40.2296	1.20547e-294	4.25033e-293	664.409	MFSD6
ENSG00000057704	0.186745	6.44165	40.2287	1.23888e-294	4.35749e-293	664.358	TMCC3
ENSG00000088833	0.119943	5.87463	40.2231	1.44827e-294	5.08162e-293	664.192	NSFL1C
ENSG00000178105	-0.105216	4.49842	-40.2058	2.36115e-294	8.26459e-293	663.749	DDX10
ENSG00000213347	0.17502	4.45236	40.1531	1.03922e-293	3.62875e-292	662.238	MXD3
ENSG00000139370	0.129343	6.74563	40.1209	2.57085e-293	8.95521e-292	661.325	SLC15A4
ENSG00000140199	0.150556	8.0229	40.118	2.784e-293	9.6744e-292	661.262	SLC12A6
ENSG00000100461	0.103549	6.81365	40.094	5.46693e-293	1.8952e-291	660.569	RBM23
ENSG00000182541	0.20297	7.07248	40.0902	6.09196e-293	2.10683e-291	660.474	LIMK2
ENSG00000157800	0.157864	5.07946	40.09	6.11676e-293	2.11036e-291	660.457	SLC37A3
ENSG00000128383	0.204639	6.9002	40.0896	6.19734e-293	2.13307e-291	660.455	APOBEC3A
ENSG00000185418	-0.116298	4.22926	-40.0879	6.4971e-293	2.23093e-291	660.434	TARSL2
ENSG00000151623	-0.184004	4.86189	-40.0725	1.00162e-292	3.43114e-291	660.005	NR3C2
ENSG00000196083	0.207435	6.76411	40.0362	2.77535e-292	9.48476e-291	658.957	IL1RAP
ENSG00000033800	0.084687	7.33181	40.0278	3.51483e-292	1.19836e-290	658.713	PIAS1
ENSG00000170852	0.0795203	6.76808	40.0022	7.20646e-292	2.45121e-290	657.99	KBTBD2
ENSG00000171236	0.245108	5.68825	39.9976	8.21037e-292	2.78613e-290	657.87	LRG1
ENSG00000027697	0.154939	7.59341	39.9721	1.68071e-291	5.69e-290	657.162	IFNGR1
ENSG00000164466	-0.103424	4.94619	-39.9664	1.96896e-291	6.6503e-290	657.028	SFXN1
ENSG00000142166	0.121211	7.15561	39.9643	2.08788e-291	7.03552e-290	656.936	IFNAR1
ENSG00000038219	0.114947	8.80748	39.928	5.78636e-291	1.94529e-289	655.937	BOD1L1
ENSG00000093134	0.223531	6.41485	39.9225	6.75658e-291	2.26544e-289	655.766	VNN3
ENSG00000134324	-0.100304	5.7493	-39.9224	6.77e-291	2.26544e-289	655.779	LPIN1
ENSG00000015171	-0.105861	5.31527	-39.9211	7.01843e-291	2.34315e-289	655.752	ZMYND11
ENSG00000135932	0.0998381	7.5966	39.9203	7.1869e-291	2.39387e-289	655.704	CAB39
ENSG00000198105	-0.130874	4.02913	-39.8852	1.92427e-290	6.39478e-289	654.743	ZNF248
ENSG00000072952	0.219431	5.5727	39.8686	3.06219e-290	1.0153e-288	654.251	MRVI1
ENSG00000130150	0.144325	6.13263	39.8521	4.86552e-290	1.60952e-288	653.783	MOSPD2
ENSG00000215301	0.0880512	9.2919	39.849	5.30402e-290	1.75057e-288	653.727	DDX3X
ENSG00000112303	0.235592	9.19013	39.8487	5.35634e-290	1.76381e-288	653.727	VNN2
ENSG00000002919	0.112622	4.73872	39.8273	9.75162e-290	3.20385e-288	653.092	SNX11
ENSG00000135775	-0.0704047	4.99597	-39.8056	1.79317e-289	5.87802e-288	652.515	COG2
ENSG00000139112	0.131922	5.91242	39.8044	1.85334e-289	6.06151e-288	652.444	GABARAPL1
ENSG00000247774	-0.135819	5.44524	-39.8018	1.99487e-289	6.50966e-288	652.411	PCED1B-AS1
ENSG00000106351	-0.159396	3.54675	-39.7895	2.80919e-289	9.14631e-288	652.025	AGFG2
ENSG00000117090	-0.157032	4.32522	-39.7843	3.25622e-289	1.0578e-287	651.923	SLAMF1
ENSG00000198909	0.123243	6.39518	39.7694	4.93788e-289	1.60049e-287	651.467	MAP3K3
ENSG00000151702	0.0658905	7.45267	39.7579	6.80917e-289	2.20209e-287	651.151	FLI1
ENSG00000235750	0.11435	7.25465	39.717	2.14443e-288	6.91961e-287	650.008	KIAA0040
ENSG00000132965	0.193364	6.97317	39.7132	2.38126e-288	7.6667e-287	649.909	ALOX5AP
ENSG00000224078	-0.133734	7.30357	-39.7112	2.52055e-288	8.09714e-287	649.855	SNHG14
ENSG00000170006	0.161105	9.17867	39.693	4.19175e-288	1.34359e-286	649.367	TMEM154
ENSG00000112195	0.173971	5.84155	39.6828	5.58678e-288	1.78678e-286	649.045	TREML2
ENSG00000177663	0.173011	7.58518	39.6214	3.11478e-287	9.93978e-286	647.345	IL17RA
ENSG00000185104	-0.0655425	5.17067	-39.6209	3.15951e-287	1.00603e-285	647.345	FAF1
ENSG00000163947	-0.0829399	6.36275	-39.6069	4.67122e-287	1.48411e-285	646.935	ARHGEF3
ENSG00000198053	0.191544	6.43695	39.6058	4.80997e-287	1.52484e-285	646.9	SIRPA
ENSG00000146094	0.193958	5.32817	39.6029	5.22219e-287	1.6519e-285	646.817	DOK3
ENSG00000132357	0.121639	4.04148	39.5991	5.8022e-287	1.83137e-285	646.724	CARD6
ENSG00000170525	0.195868	5.49246	39.5374	3.26165e-286	1.02724e-284	644.984	PFKFB3
ENSG00000141480	0.132346	7.43486	39.5343	3.55505e-286	1.11721e-284	644.907	ARRB2
ENSG00000136925	-0.0823312	4.07851	-39.5307	3.93283e-286	1.23325e-284	644.84	TSTD2
ENSG00000139496	0.0879499	6.53702	39.5276	4.27895e-286	1.33889e-284	644.706	NUP58
ENSG00000107341	0.132202	5.73587	39.5193	5.40769e-286	1.68841e-284	644.473	UBE2R2
ENSG00000136630	0.175503	3.95239	39.516	5.92635e-286	1.84636e-284	644.404	HLX
ENSG00000198700	-0.0803219	5.51628	-39.4945	1.07962e-285	3.35634e-284	643.812	IPO9
ENSG00000166439	0.0797897	7.44788	39.4826	1.50592e-285	4.67158e-284	643.458	RNF169
ENSG00000286065	-0.155891	5.39959	-39.4748	1.87235e-285	5.79585e-284	643.276	NA
ENSG00000082996	0.131383	7.05414	39.4516	3.58378e-285	1.10699e-283	642.594	RNF13
ENSG00000140350	0.0792754	7.05887	39.4361	5.51196e-285	1.69895e-283	642.157	ANP32A
ENSG00000108424	0.0970962	7.6333	39.4349	5.70748e-285	1.75548e-283	642.132	KPNB1
ENSG00000065559	0.107908	6.1936	39.4287	6.78736e-285	2.08319e-283	641.945	MAP2K4
ENSG00000103356	-0.108459	3.6643	-39.4123	1.07255e-284	3.2849e-283	641.519	EARS2
ENSG00000180353	0.105808	8.78913	39.4112	1.10738e-284	3.3844e-283	641.487	HCLS1
ENSG00000145860	0.074816	6.62612	39.4085	1.19254e-284	3.63698e-283	641.381	RNF145
ENSG00000172243	0.149242	7.81743	39.4042	1.34526e-284	4.09413e-283	641.284	CLEC7A
ENSG00000163297	0.106165	7.3598	39.401	1.46921e-284	4.46197e-283	641.184	ANTXR2
ENSG00000188785	-0.11501	4.53371	-39.3753	3.01083e-284	9.12463e-283	640.509	ZNF548
ENSG00000112242	0.134055	4.88521	39.3474	6.55774e-284	1.98324e-282	639.684	E2F3
ENSG00000113649	-0.0867041	5.52518	-39.3357	9.07913e-284	2.74004e-282	639.386	TCERG1
ENSG00000101474	0.160055	7.11975	39.3111	1.80703e-283	5.44216e-282	638.681	APMAP
ENSG00000117410	0.143363	6.76042	39.2873	3.49955e-283	1.05176e-281	638.015	ATP6V0B
ENSG00000198393	-0.101103	5.0195	-39.2769	4.68397e-283	1.4048e-281	637.761	ZNF26
ENSG00000103313	0.180185	7.47503	39.2394	1.33314e-282	3.99002e-281	636.691	MEFV
ENSG00000144741	-0.11438	3.56857	-39.2234	2.07645e-282	6.20189e-281	636.254	SLC25A26
ENSG00000065135	0.0876988	7.35337	39.2129	2.78641e-282	8.30522e-281	635.943	GNAI3
ENSG00000073331	0.194321	7.24192	39.204	3.56415e-282	1.06015e-280	635.708	ALPK1
ENSG00000170345	0.199466	5.77995	39.1992	4.07666e-282	1.21011e-280	635.561	FOS
ENSG00000163464	0.227017	8.58407	39.189	5.42149e-282	1.60601e-280	635.309	CXCR1
ENSG00000146828	0.141957	6.24286	39.1814	6.69911e-282	1.98042e-280	635.062	SLC12A9
ENSG00000168214	0.119019	7.10523	39.1807	6.8238e-282	2.01316e-280	635.048	RBPJ
ENSG00000161533	0.16395	7.33717	39.1781	7.34731e-282	2.16319e-280	634.982	ACOX1
ENSG00000165733	-0.0978663	5.21667	-39.177	7.57839e-282	2.22535e-280	634.976	BMS1
ENSG00000182831	0.109279	8.80582	39.1769	7.58924e-282	2.22535e-280	634.964	C16orf72
ENSG00000146414	-0.0873982	6.54992	-39.1577	1.29595e-281	3.79235e-280	634.413	SHPRH
ENSG00000181826	0.157975	5.46285	39.1452	1.83489e-281	5.35861e-280	634.053	RELL1
ENSG00000102010	0.241965	2.54517	39.1386	2.2066e-281	6.43118e-280	633.915	BMX
ENSG00000164506	0.113141	7.30142	39.1251	3.21295e-281	9.34535e-280	633.502	STXBP5
ENSG00000156052	0.137398	7.31274	39.1236	3.35e-281	9.72441e-280	633.464	GNAQ
ENSG00000135838	0.170846	6.2828	39.0834	1.02348e-280	2.96502e-279	632.34	NPL
ENSG00000146909	-0.0871129	4.34679	-39.0783	1.17868e-280	3.40779e-279	632.247	NOM1
ENSG00000109586	0.0848289	5.41756	39.0551	2.24636e-280	6.48171e-279	631.547	GALNT7
ENSG00000083123	-0.131676	3.17871	-39.0408	3.3426e-280	9.62563e-279	631.133	BCKDHB
ENSG00000113161	0.101507	6.24534	39.0345	3.98656e-280	1.14572e-278	630.974	HMGCR
ENSG00000184677	-0.0955125	6.00007	-38.9959	1.16606e-279	3.34456e-278	629.928	ZBTB40
ENSG00000129158	-0.109825	3.91933	-38.9937	1.23866e-279	3.54576e-278	629.892	SERGEF
ENSG00000069275	-0.0929744	6.62859	-38.9924	1.28612e-279	3.67434e-278	629.821	NUCKS1
ENSG00000174282	-0.0997895	5.06733	-38.9838	1.63059e-279	4.64927e-278	629.614	ZBTB4
ENSG00000163026	-0.113224	3.42616	-38.9784	1.89346e-279	5.38817e-278	629.438	WDCP
ENSG00000157540	0.0626576	8.03847	38.9665	2.64099e-279	7.50062e-278	629.101	DYRK1A
ENSG00000120709	0.170442	5.65866	38.9641	2.82357e-279	8.00345e-278	629.022	FAM53C
ENSG00000125827	0.118936	7.49122	38.9606	3.10932e-279	8.79614e-278	628.938	TMX4
ENSG00000059588	-0.114443	5.16987	-38.9466	4.58959e-279	1.29584e-277	628.58	TARBP1
ENSG00000187554	0.206042	4.97865	38.9441	4.91778e-279	1.3858e-277	628.474	TLR5
ENSG00000156273	0.136993	8.72327	38.9347	6.37956e-279	1.79422e-277	628.239	BACH1
ENSG00000166261	-0.105496	3.81842	-38.9346	6.39339e-279	1.79462e-277	628.25	ZNF202
ENSG00000111300	-0.0908518	4.98853	-38.913	1.16656e-278	3.26818e-277	627.649	NAA25
ENSG00000123329	0.135799	6.6809	38.9119	1.20126e-278	3.35887e-277	627.579	ARHGAP9
ENSG00000125354	-0.0966667	6.25396	-38.8963	1.85358e-278	5.17285e-277	627.162	2025-09-06
ENSG00000214456	0.193831	2.73918	38.891	2.14836e-278	5.97757e-277	627.042	PLIN5
ENSG00000145349	-0.113732	5.54294	-38.8909	2.15021e-278	5.97757e-277	627.03	CAMK2D
ENSG00000012232	0.147184	5.94	38.8395	8.95602e-278	2.48499e-276	625.567	EXTL3
ENSG00000131236	0.106429	8.80779	38.8348	1.02044e-277	2.82594e-276	625.468	CAP1
ENSG00000116741	0.206248	8.74292	38.8191	1.57918e-277	4.36493e-276	625.041	RGS2
ENSG00000138449	0.162642	7.01163	38.8133	1.85128e-277	5.10728e-276	624.854	SLC40A1
ENSG00000213782	-0.0882503	4.80381	-38.8105	2.00208e-277	5.51278e-276	624.813	DDX47
ENSG00000167434	0.22351	2.77412	38.8003	2.65716e-277	7.30265e-276	624.527	CA4
ENSG00000134996	0.104302	6.92169	38.7985	2.7957e-277	7.66882e-276	624.434	OSTF1
ENSG00000051825	-0.0947303	5.44058	-38.7965	2.95318e-277	8.08545e-276	624.411	MPHOSPH9
ENSG00000173757	0.122058	7.79879	38.7855	4.00576e-277	1.09466e-275	624.088	STAT5B
ENSG00000139946	0.145443	6.46156	38.753	9.87616e-277	2.69377e-275	623.173	PELI2
ENSG00000138772	0.285204	4.81985	38.7368	1.54456e-276	4.20493e-275	622.74	ANXA3
ENSG00000196549	0.251343	8.54855	38.6816	7.11992e-276	1.93469e-274	621.238	MME
ENSG00000284948	0.185851	3.98871	38.6596	1.31019e-275	3.55348e-274	620.611	NA
ENSG00000198286	-0.143191	5.22893	-38.6549	1.49451e-275	4.04581e-274	620.505	CARD11
ENSG00000171824	-0.0742995	5.30115	-38.6377	2.40197e-275	6.49025e-274	620.016	EXOSC10
ENSG00000153933	-0.133469	4.67618	-38.6288	3.07351e-275	8.28929e-274	619.792	DGKE
ENSG00000196329	-0.117982	7.6012	-38.6271	3.21951e-275	8.6669e-274	619.703	GIMAP5
ENSG00000130024	-0.113356	5.24924	-38.6044	6.04263e-275	1.62365e-273	619.105	PHF10
ENSG00000255112	0.104605	6.74076	38.6	6.81494e-275	1.82777e-273	618.941	CHMP1B
ENSG00000087053	-0.111011	4.06773	-38.5919	8.5258e-275	2.28239e-273	618.772	MTMR2
ENSG00000162413	0.131071	5.9939	38.5796	1.19915e-274	3.20424e-273	618.374	KLHL21
ENSG00000100503	0.0868984	8.77358	38.5513	2.62666e-274	7.00571e-273	617.62	NIN
ENSG00000237441	0.116465	5.71107	38.5421	3.38488e-274	9.01138e-273	617.335	RGL2
ENSG00000175029	0.106193	5.71174	38.5033	9.89646e-274	2.62984e-272	616.262	CTBP2
ENSG00000105866	-0.0857218	5.89265	-38.4784	1.96596e-273	5.21467e-272	615.605	SP4
ENSG00000138190	0.121205	5.50194	38.461	3.18175e-273	8.42406e-272	615.098	EXOC6
ENSG00000105352	0.216406	4.60188	38.4592	3.34282e-273	8.83434e-272	615.063	CEACAM4
ENSG00000171310	0.118445	7.26339	38.4531	3.9611e-273	1.04492e-271	614.89	CHST11
ENSG00000160746	0.105021	3.82795	38.4395	5.75823e-273	1.51623e-271	614.537	ANO10
ENSG00000182885	0.247732	5.51991	38.4345	6.61083e-273	1.73757e-271	614.38	ADGRG3
ENSG00000100368	0.183846	8.14673	38.4281	7.89835e-273	2.07221e-271	614.222	CSF2RB
ENSG00000118961	-0.108838	3.93326	-38.409	1.33941e-272	3.5077e-271	613.72	LDAH
ENSG00000172673	-0.177181	6.09589	-38.4049	1.49876e-272	3.91792e-271	613.591	THEMIS
ENSG00000168297	0.107305	5.1392	38.3972	1.85543e-272	4.84153e-271	613.338	PXK
ENSG00000132286	-0.0839515	4.434	-38.3872	2.44186e-272	6.36028e-271	613.121	TIMM10B
ENSG00000066084	0.116732	7.50743	38.3798	2.99795e-272	7.79466e-271	612.871	DIP2B
ENSG00000157551	0.255514	7.62692	38.3795	3.02034e-272	7.8388e-271	612.882	KCNJ15
ENSG00000140382	-0.0737162	5.03341	-38.3775	3.18794e-272	8.25895e-271	612.84	HMG20A
ENSG00000084070	0.189454	7.1817	38.3765	3.28237e-272	8.48837e-271	612.786	SMAP2
ENSG00000134982	0.0923518	7.29654	38.3662	4.3602e-272	1.12556e-270	612.491	APC
ENSG00000138796	-0.104391	3.69134	-38.3538	6.13901e-272	1.58192e-270	612.193	HADH
ENSG00000179195	-0.0778683	5.16973	-38.3271	1.28166e-271	3.29673e-270	611.447	ZNF664
ENSG00000110446	0.129016	5.4108	38.3173	1.67785e-271	4.30818e-270	611.137	SLC15A3
ENSG00000131378	-0.0958693	5.14804	-38.3165	1.71647e-271	4.39952e-270	611.161	RFTN1
ENSG00000012660	0.101689	7.53538	38.3109	2.00649e-271	5.13378e-270	610.971	ELOVL5
ENSG00000164713	0.126152	4.95129	38.3036	2.45239e-271	6.26357e-270	610.762	BRI3
ENSG00000108506	-0.0915912	4.38592	-38.2718	5.8913e-271	1.50202e-269	609.943	INTS2
ENSG00000287255	0.217612	1.29509	38.2627	7.56414e-271	1.92513e-269	609.694	NA
ENSG00000152465	-0.143737	4.4118	-38.2541	9.60157e-271	2.43937e-269	609.457	NMT2
ENSG00000142657	0.170616	7.45896	38.245	1.23282e-270	3.12661e-269	609.166	PGD
ENSG00000254087	0.165667	8.46372	38.2028	3.94708e-270	9.99281e-269	608.017	LYN
ENSG00000178802	-0.117581	4.12975	-38.1981	4.48288e-270	1.13295e-268	607.917	MPI
ENSG00000198363	0.180525	5.78703	38.14	2.21917e-269	5.59865e-268	606.262	ASPH
ENSG00000103522	-0.153396	4.14064	-38.1261	3.25625e-269	8.20075e-268	605.934	IL21R
ENSG00000145041	-0.0873316	5.09395	-38.121	3.75058e-269	9.42929e-268	605.779	DCAF1
ENSG00000169905	0.0634346	6.63997	38.1165	4.24248e-269	1.06474e-267	605.606	TOR1AIP2
ENSG00000142046	0.15346	4.1073	38.114	4.53869e-269	1.13711e-267	605.564	TMEM91
ENSG00000188404	0.153912	9.64905	38.1053	5.77842e-269	1.44521e-267	605.352	SELL
ENSG00000106070	0.209781	2.74204	38.0925	8.20154e-269	2.04769e-267	605.004	GRB10
ENSG00000138069	0.0815762	5.78003	38.0717	1.45469e-268	3.62569e-267	604.374	RAB1A
ENSG00000087074	0.139197	5.44324	38.0486	2.74666e-268	6.83403e-267	603.745	PPP1R15A
ENSG00000070882	-0.114925	5.15158	-38.0279	4.85327e-268	1.20548e-266	603.225	OSBPL3
ENSG00000116017	0.147471	4.96372	38.0197	6.06857e-268	1.50476e-266	602.958	ARID3A
ENSG00000089123	-0.108958	3.28792	-37.9968	1.13898e-267	2.81935e-266	602.352	TASP1
ENSG00000145191	-0.0694605	5.25925	-37.9964	1.15255e-267	2.84809e-266	602.349	EIF2B5
ENSG00000112531	0.119654	7.90679	37.9626	2.91788e-267	7.1981e-266	601.404	QKI
ENSG00000075420	0.138518	7.22088	37.9274	7.67522e-267	1.89017e-265	600.43	FNDC3B
ENSG00000169403	0.174438	8.09945	37.9173	1.01219e-266	2.48848e-265	600.172	PTAFR
ENSG00000011376	-0.0822696	4.48388	-37.9151	1.07426e-266	2.63659e-265	600.143	LARS2
ENSG00000113749	0.212029	5.87949	37.9091	1.26659e-266	3.10337e-265	599.924	HRH2
ENSG00000160208	-0.107473	4.2844	-37.8869	2.33213e-266	5.70444e-265	599.373	RRP1B
ENSG00000174373	-0.0854973	6.50978	-37.8791	2.88304e-266	7.04007e-265	599.11	RALGAPA1
ENSG00000058600	-0.0917786	4.83341	-37.8661	4.12228e-266	1.00492e-264	598.794	POLR3E
ENSG00000112685	-0.0805168	5.91817	-37.8424	7.89944e-266	1.92246e-264	598.112	EXOC2
ENSG00000135372	-0.103125	4.59267	-37.84	8.44122e-266	2.05086e-264	598.085	NAT10
ENSG00000177674	0.127521	5.09018	37.8127	1.7848e-265	4.32903e-264	597.279	AGTRAP
ENSG00000243943	-0.0747381	5.25146	-37.8097	1.93455e-265	4.68439e-264	597.233	ZNF512
ENSG00000107077	-0.0704681	6.66194	-37.8068	2.0978e-265	5.0712e-264	597.122	KDM4C
ENSG00000105339	0.182491	7.95065	37.8055	2.17333e-265	5.24501e-264	597.107	DENND3
ENSG00000130921	-0.114082	3.98141	-37.7913	3.20638e-265	7.72524e-264	596.754	C12orf65
ENSG00000243406	-0.132983	2.93249	-37.784	3.91818e-265	9.4245e-264	596.471	MRPS31P5
ENSG00000168234	-0.113154	5.43491	-37.7835	3.96727e-265	9.52672e-264	596.521	TTC39C
ENSG00000089094	-0.0949455	4.53938	-37.7751	4.9934e-265	1.19709e-263	596.309	KDM2B
ENSG00000176788	0.240865	6.78927	37.751	9.66974e-265	2.31433e-263	595.606	BASP1
ENSG00000198721	-0.105731	4.15773	-37.7245	2.00135e-264	4.78208e-263	594.927	ECI2
ENSG00000197249	0.189263	7.11078	37.7129	2.74869e-264	6.55694e-263	594.56	SERPINA1
ENSG00000144040	0.110033	4.30333	37.6985	4.07266e-264	9.69924e-263	594.168	SFXN5
ENSG00000138463	0.125256	4.8126	37.6982	4.11003e-264	9.77213e-263	594.145	DIRC2
ENSG00000106348	0.153761	5.78447	37.6958	4.38737e-264	1.04144e-262	594.078	IMPDH1
ENSG00000101558	0.092256	7.06564	37.6945	4.54973e-264	1.07821e-262	594.043	VAPA
ENSG00000140995	0.136203	6.40202	37.6898	5.16542e-264	1.22212e-262	593.915	DEF8
ENSG00000109133	0.0890979	6.65003	37.6831	6.22015e-264	1.46926e-262	593.726	TMEM33
ENSG00000157450	0.0783754	5.71167	37.6784	7.07375e-264	1.66816e-262	593.592	RNF111
ENSG00000211751	-0.159844	6.65187	-37.669	9.14677e-264	2.15351e-262	593.374	TRBC1
ENSG00000068383	0.103135	4.57269	37.6598	1.17564e-263	2.76343e-262	593.101	INPP5A
ENSG00000197943	0.109221	7.58374	37.6562	1.29568e-263	3.04063e-262	593.007	PLCG2
ENSG00000109016	0.0876146	3.69917	37.6489	1.58469e-263	3.71285e-262	592.834	DHRS7B
ENSG00000118518	0.0837881	5.70301	37.6471	1.6632e-263	3.89048e-262	592.739	RNF146
ENSG00000100266	0.152846	7.01792	37.6339	2.38596e-263	5.57213e-262	592.395	PACSIN2
ENSG00000166260	-0.108467	4.54854	-37.6238	3.14906e-263	7.34239e-262	592.172	COX11
ENSG00000143799	-0.0972077	6.52887	-37.5864	8.75998e-263	2.0392e-261	591.102	PARP1
ENSG00000163563	0.186118	10.0409	37.583	9.61097e-263	2.2337e-261	591.052	MNDA
ENSG00000169228	0.133401	5.80702	37.5659	1.53391e-262	3.55927e-261	590.524	RAB24
ENSG00000130956	-0.162491	3.12868	-37.5658	1.5375e-262	3.56187e-261	590.521	HABP4
ENSG00000135604	0.153449	6.27846	37.5577	1.91887e-262	4.43827e-261	590.304	STX11
ENSG00000131876	-0.108179	3.94478	-37.5441	2.78152e-262	6.42326e-261	589.999	SNRPA1
ENSG00000186416	-0.105091	3.52755	-37.5067	7.73255e-262	1.7828e-260	588.965	NKRF
ENSG00000112096	0.193892	10.5626	37.4892	1.24645e-261	2.86922e-260	588.498	SOD2
ENSG00000164463	0.102761	7.84372	37.4788	1.65552e-261	3.8048e-260	588.166	CREBRF
ENSG00000129351	-0.0701579	6.83571	-37.4744	1.86961e-261	4.29002e-260	588.034	ILF3
ENSG00000100330	0.147741	7.34092	37.4669	2.28917e-261	5.24442e-260	587.84	MTMR3
ENSG00000235568	0.185045	6.30672	37.4633	2.52934e-261	5.78546e-260	587.733	NFAM1
ENSG00000118308	0.106968	7.13231	37.4477	3.87191e-261	8.8424e-260	587.307	LRMP
ENSG00000136560	0.0863529	6.78444	37.4445	4.22613e-261	9.63611e-260	587.212	TANK
ENSG00000057935	-0.132019	3.14437	-37.4359	5.34738e-261	1.21735e-259	586.994	MTA3
ENSG00000137312	0.147395	6.20869	37.4249	7.21414e-261	1.63974e-259	586.68	FLOT1
ENSG00000119669	0.148242	4.55644	37.4242	7.35459e-261	1.66904e-259	586.673	IRF2BPL
ENSG00000136167	0.114306	10.9216	37.4224	7.73028e-261	1.75155e-259	586.674	LCP1
ENSG00000131844	-0.0958191	3.99265	-37.4195	8.35285e-261	1.88965e-259	586.602	MCCC2
ENSG00000204054	0.137066	5.23859	37.4185	8.59616e-261	1.94166e-259	586.503	LINC00963
ENSG00000174718	0.132826	10.4013	37.3904	1.8489e-260	4.16969e-259	585.799	KIAA1551
ENSG00000179299	0.199248	2.70542	37.3895	1.89666e-260	4.27073e-259	585.768	NSUN7
ENSG00000185379	-0.103293	4.11259	-37.3887	1.93489e-260	4.35004e-259	585.764	RAD51D
ENSG00000035664	0.181636	5.64588	37.3689	3.32386e-260	7.45604e-259	585.154	DAPK2
ENSG00000114331	0.104778	8.41975	37.3689	3.32675e-260	7.45604e-259	585.179	ACAP2
ENSG00000134815	0.151013	5.52523	37.3609	4.13473e-260	9.25257e-259	584.935	DHX34
ENSG00000109323	0.0965799	6.61305	37.3514	5.35351e-260	1.19614e-258	584.674	MANBA
ENSG00000119004	-0.0733776	5.43053	-37.3471	6.02411e-260	1.3439e-258	584.593	CYP20A1
ENSG00000171302	0.127708	5.45691	37.3392	7.46272e-260	1.66227e-258	584.342	CANT1
ENSG00000267365	0.166339	1.88302	37.3373	7.86825e-260	1.7499e-258	584.362	KCNJ2-AS1
ENSG00000185973	0.0868988	5.16511	37.334	8.61335e-260	1.91267e-258	584.199	TMLHE
ENSG00000111785	-0.101083	4.16032	-37.3307	9.42004e-260	2.08859e-258	584.183	RIC8B
ENSG00000130775	0.135217	8.14889	37.3241	1.12673e-259	2.49435e-258	583.96	THEMIS2
ENSG00000247626	-0.121285	3.61727	-37.3062	1.83634e-259	4.05904e-258	583.503	MARS2
ENSG00000103550	-0.104277	3.7285	-37.3046	1.91658e-259	4.22993e-258	583.468	KNOP1
ENSG00000102144	0.08446	8.43061	37.2818	3.56735e-259	7.86123e-258	582.806	PGK1
ENSG00000138614	-0.0878412	4.27843	-37.2675	5.2676e-259	1.15903e-257	582.462	VWA9
ENSG00000137509	0.0956986	6.73293	37.2578	6.86992e-259	1.50929e-257	582.126	PRCP
ENSG00000205045	-0.144407	5.30145	-37.244	9.98184e-259	2.18964e-257	581.808	SLFN12L
ENSG00000131355	0.181779	6.32617	37.2368	1.21567e-258	2.66269e-257	581.563	ADGRE3
ENSG00000122694	0.120427	7.01971	37.2354	1.2618e-258	2.75954e-257	581.526	GLIPR2
ENSG00000172845	0.0805315	8.31302	37.2161	2.13434e-258	4.66073e-257	581.016	SP3
ENSG00000165650	0.125122	6.72131	37.2157	2.16003e-258	4.70971e-257	580.986	PDZD8
ENSG00000077420	0.138244	6.54704	37.2139	2.26538e-258	4.93197e-257	580.938	APBB1IP
ENSG00000092036	0.159177	5.25521	37.2095	2.55477e-258	5.55365e-257	580.815	HAUS4
ENSG00000146592	0.226546	7.17761	37.199	3.40352e-258	7.38758e-257	580.552	CREB5
ENSG00000173597	0.23052	6.38647	37.196	3.68841e-258	7.99394e-257	580.462	SULT1B1
ENSG00000154889	0.111271	6.36027	37.1958	3.71184e-258	8.0327e-257	580.439	MPPE1
ENSG00000001497	-0.0908902	4.38097	-37.1894	4.41317e-258	9.53615e-257	580.338	LAS1L
ENSG00000133422	-0.0914159	4.98296	-37.1893	4.43096e-258	9.56029e-257	580.319	MORC2
ENSG00000150977	0.108703	5.32956	37.1558	1.1012e-257	2.37242e-256	579.352	RILPL2
ENSG00000125630	-0.0907024	4.71522	-37.1524	1.20857e-257	2.59986e-256	579.324	POLR1B
ENSG00000288156	0.126722	4.90661	37.1519	1.22641e-257	2.63432e-256	579.251	NA
ENSG00000109680	-0.178447	3.21665	-37.1473	1.38905e-257	2.97924e-256	579.144	TBC1D19
ENSG00000196663	0.189922	6.61072	37.1463	1.42667e-257	3.0554e-256	579.107	TECPR2
ENSG00000100991	0.0683685	6.5721	37.1447	1.48987e-257	3.18602e-256	579.047	TRPC4AP
ENSG00000186529	0.229965	6.84937	37.1423	1.59016e-257	3.39547e-256	579.007	CYP4F3
ENSG00000168827	-0.0728195	5.29513	-37.1254	2.51875e-257	5.37036e-256	578.568	GFM1
ENSG00000177034	-0.132721	4.43802	-37.1197	2.9434e-257	6.26654e-256	578.446	MTX3
ENSG00000117899	-0.0637584	5.1014	-37.1167	3.18798e-257	6.77728e-256	578.336	MESDC2
ENSG00000140455	0.0799638	7.04723	37.1162	3.23839e-257	6.87434e-256	578.279	USP3
ENSG00000180884	-0.0949305	4.76417	-37.1153	3.31571e-257	7.02814e-256	578.315	ZNF792
ENSG00000090470	-0.0932102	3.79732	-37.1104	3.78403e-257	8.00907e-256	578.195	PDCD7
ENSG00000103365	-0.0948638	6.33953	-37.1101	3.82104e-257	8.07558e-256	578.132	GGA2
ENSG00000205423	0.110383	4.8358	37.1084	3.99974e-257	8.44091e-256	578.071	CNEP1R1
ENSG00000109046	0.0927871	7.48672	37.107	4.15447e-257	8.75466e-256	578.039	WSB1
ENSG00000151553	0.116234	5.96808	37.0832	7.92555e-257	1.66771e-255	577.38	FAM160B1
ENSG00000008130	0.161657	7.60958	37.079	8.88117e-257	1.86608e-255	577.291	NADK
ENSG00000168404	0.100332	5.99156	37.0748	9.95721e-257	2.08913e-255	577.149	MLKL
ENSG00000175792	-0.104568	4.08279	-37.043	2.36532e-256	4.95552e-255	576.366	RUVBL1
ENSG00000152409	-0.114104	4.66592	-37.037	2.78036e-256	5.81662e-255	576.197	JMY
ENSG00000286076	0.191559	1.83824	37.0232	4.05231e-256	8.46536e-255	575.826	NA
ENSG00000154310	-0.106183	5.99976	-36.9683	1.79683e-255	3.74819e-254	574.295	TNIK
ENSG00000225342	0.160013	4.19146	36.9616	2.15716e-255	4.49337e-254	574.101
ENSG00000198961	0.0936839	8.05981	36.9505	2.90822e-255	6.04911e-254	573.805	PJA2
ENSG00000112365	-0.0792988	5.13341	-36.9417	3.69742e-255	7.67959e-254	573.592	ZBTB24
ENSG00000149474	-0.0990015	4.34356	-36.9244	5.91451e-255	1.22669e-253	573.149	KAT14
ENSG00000113048	-0.082917	4.68784	-36.9128	8.09004e-255	1.6755e-253	572.825	MRPS27
ENSG00000156931	0.101645	7.43677	36.9123	8.20174e-255	1.6962e-253	572.759	VPS8
ENSG00000135127	-0.176668	2.96669	-36.9104	8.64254e-255	1.78481e-253	572.68	BICDL1
ENSG00000162704	0.112155	8.41218	36.9084	9.11128e-255	1.87893e-253	572.673	ARPC5
ENSG00000138134	-0.130451	4.49263	-36.9051	9.96417e-255	2.05188e-253	572.628	STAMBPL1
ENSG00000276649	0.156855	2.55269	36.893	1.38437e-254	2.84673e-253	572.291
ENSG00000122862	0.189012	9.68276	36.8707	2.53403e-254	5.2034e-253	571.682	SRGN
ENSG00000135083	0.231904	4.86483	36.8664	2.8484e-254	5.84063e-253	571.516	CCNJL
ENSG00000184205	-0.15639	3.40267	-36.851	4.31736e-254	8.8402e-253	571.136	TSPYL2
ENSG00000164038	-0.140724	2.92461	-36.8432	5.3456e-254	1.09301e-252	570.881	SLC9B2
ENSG00000258082	0.142693	1.84841	36.8414	5.61304e-254	1.14607e-252	570.904
ENSG00000249138	0.201693	2.43223	36.8241	8.96416e-254	1.82773e-252	570.424
ENSG00000137642	0.181275	10.9949	36.8218	9.54676e-254	1.94377e-252	570.37	SORL1
ENSG00000135506	0.0950905	6.70437	36.8056	1.47913e-253	3.00735e-252	569.858	OS9
ENSG00000064763	0.147031	5.18703	36.8049	1.50728e-253	3.06029e-252	569.841	FAR2
ENSG00000241878	0.154047	5.70346	36.8023	1.61635e-253	3.27713e-252	569.77	PISD
ENSG00000115604	0.167248	5.08067	36.7938	2.03461e-253	4.11937e-252	569.544	IL18R1
ENSG00000162894	-0.164731	4.94645	-36.7932	2.06967e-253	4.1845e-252	569.594	FCMR
ENSG00000135870	0.0944292	7.60974	36.7666	4.24576e-253	8.57216e-252	568.818	RC3H1
ENSG00000125505	0.186582	6.15614	36.7495	6.75496e-253	1.36192e-251	568.349	MBOAT7
ENSG00000231074	-0.0978771	6.98526	-36.7425	8.16861e-253	1.64464e-251	568.165	HCG18
ENSG00000170876	0.102391	6.73756	36.728	1.20814e-252	2.42905e-251	567.761	TMEM43
ENSG00000272501	0.127751	4.69662	36.7191	1.53609e-252	3.08414e-251	567.528
ENSG00000132475	0.127726	9.25819	36.719	1.542e-252	3.09171e-251	567.564	H3F3B
ENSG00000086300	0.146367	6.46013	36.7123	1.84815e-252	3.7004e-251	567.341	SNX10
ENSG00000265666	0.142531	2.10775	36.7005	2.54012e-252	5.07884e-251	567.096	RARA-AS1
ENSG00000170956	0.171559	4.80931	36.6858	3.78654e-252	7.56052e-251	566.626	CEACAM3
ENSG00000108061	0.0948955	7.19315	36.6827	4.11756e-252	8.21013e-251	566.542	SHOC2
ENSG00000181192	0.087977	5.50106	36.6812	4.28358e-252	8.5294e-251	566.491	DHTKD1
ENSG00000189077	0.132617	4.14247	36.6505	9.80758e-252	1.95018e-250	565.693	TMEM120A
ENSG00000171960	-0.0974049	3.56098	-36.6485	1.03753e-251	2.06023e-250	565.687	PPIH
ENSG00000135636	0.255889	6.72168	36.6392	1.33091e-251	2.63918e-250	565.386	DYSF
ENSG00000169239	-0.089397	5.16553	-36.6353	1.48089e-251	2.93256e-250	565.308	CA5B
ENSG00000119977	-0.106831	3.37083	-36.6294	1.73431e-251	3.42971e-250	565.164	TCTN3
ENSG00000174206	-0.120346	3.30817	-36.6272	1.84416e-251	3.64197e-250	565.093	C12orf66
ENSG00000136048	0.121974	3.81311	36.6219	2.12899e-251	4.19873e-250	564.927	DRAM1
ENSG00000116824	-0.16354	5.55274	-36.6033	3.51088e-251	6.91461e-250	564.45	CD2
ENSG00000024048	0.11659	8.51114	36.5984	4.01621e-251	7.89909e-250	564.293	UBR2
ENSG00000156026	0.0817715	4.19033	36.5956	4.32649e-251	8.49779e-250	564.213	MCU
ENSG00000009790	-0.0650407	7.29862	-36.5928	4.66856e-251	9.15721e-250	564.115	TRAF3IP3
ENSG00000169896	0.156131	6.86568	36.5911	4.88529e-251	9.56934e-250	564.075	ITGAM
ENSG00000134900	-0.0719029	7.09495	-36.585	5.76369e-251	1.12747e-249	563.906	TPP2
ENSG00000149136	-0.0871754	5.03488	-36.5814	6.34597e-251	1.23969e-249	563.858	SSRP1
ENSG00000105514	0.177429	6.51981	36.5716	8.27269e-251	1.6139e-249	563.547	RAB3D
ENSG00000134851	0.0836185	5.63945	36.5702	8.60017e-251	1.67553e-249	563.494	TMEM165
ENSG00000116815	0.103063	5.09885	36.5641	1.01381e-250	1.9725e-249	563.336	CD58
ENSG00000011600	0.149457	7.22517	36.543	1.78949e-250	3.47699e-249	562.783	TYROBP
ENSG00000135469	-0.141716	2.31014	-36.5351	2.21524e-250	4.29845e-249	562.452	COQ10A
ENSG00000174007	0.168383	4.54612	36.5249	2.91491e-250	5.64851e-249	562.292	CEP19
ENSG00000159314	0.117918	6.58666	36.5135	3.97172e-250	7.6861e-249	561.974	ARHGAP27
ENSG00000085063	0.118347	6.1641	36.4842	8.73921e-250	1.68896e-248	561.181	CD59
ENSG00000124126	0.160104	8.8758	36.4826	9.12141e-250	1.76047e-248	561.186	PREX1
ENSG00000151151	0.153587	6.11099	36.4769	1.06411e-249	2.05104e-248	560.99	IPMK
ENSG00000143748	-0.0894033	4.26081	-36.4633	1.53826e-249	2.96099e-248	560.697	NVL
ENSG00000103196	0.244763	6.47907	36.4488	2.27135e-249	4.36632e-248	560.247	CRISPLD2
ENSG00000114021	-0.106918	4.1038	-36.4367	3.14956e-249	6.04649e-248	559.985	NIT2
ENSG00000074696	-0.118423	4.27547	-36.4291	3.86573e-249	7.41153e-248	559.78	HACD3
ENSG00000163421	0.25078	6.16237	36.4282	3.95674e-249	7.57597e-248	559.69	PROK2
ENSG00000112159	-0.110695	6.81193	-36.4277	4.0164e-249	7.68003e-248	559.679	MDN1
ENSG00000033867	-0.118054	6.22626	-36.4234	4.51062e-249	8.61367e-248	559.575	SLC4A7
ENSG00000069974	0.102275	6.479	36.4206	4.85273e-249	9.25477e-248	559.47	RAB27A
ENSG00000101361	-0.0872679	5.55237	-36.4149	5.66625e-249	1.0792e-247	559.355	NOP56
ENSG00000275835	-0.115658	3.77466	-36.4127	6.00906e-249	1.14299e-247	559.339	TUBGCP5
ENSG00000149269	0.134633	7.05905	36.4075	6.91326e-249	1.31325e-247	559.127	PAK1
ENSG00000071575	-0.122859	5.65346	-36.3797	1.46324e-248	2.77594e-247	558.415	TRIB2
ENSG00000180304	0.137564	6.64887	36.3792	1.48342e-248	2.81053e-247	558.36	OAZ2
ENSG00000120306	0.197147	4.27538	36.3788	1.49636e-248	2.83134e-247	558.365	CYSTM1
ENSG00000133812	0.126098	6.59968	36.3568	2.70542e-248	5.11236e-247	557.757	SBF2
ENSG00000180871	0.228767	8.47698	36.3443	3.79337e-248	7.15887e-247	557.465	CXCR2
ENSG00000006459	0.0983778	7.76776	36.3434	3.88108e-248	7.31486e-247	557.411	KDM7A
ENSG00000101307	0.188182	6.24188	36.3341	4.98693e-248	9.38685e-247	557.15	SIRPB1
ENSG00000182923	0.125054	5.967	36.3317	5.31641e-248	9.99403e-247	557.077	CEP63
ENSG00000048828	0.0676347	7.19555	36.3271	6.02219e-248	1.13061e-246	556.957	FAM120A
ENSG00000146859	0.163413	6.87675	36.3247	6.42663e-248	1.20497e-246	556.901	TMEM140
ENSG00000107779	-0.165346	3.31361	-36.3105	9.42596e-248	1.76505e-246	556.561	BMPR1A
ENSG00000091490	-0.121033	6.20315	-36.2945	1.44934e-247	2.71043e-246	556.109	SEL1L3
ENSG00000147459	0.188891	8.3212	36.2726	2.6099e-247	4.87452e-246	555.531	DOCK5
ENSG00000163931	0.152634	8.54521	36.2718	2.66438e-247	4.96985e-246	555.509	TKT
ENSG00000165801	0.190269	5.65041	36.269	2.87849e-247	5.3623e-246	555.397	ARHGEF40
ENSG00000166527	0.214428	3.99658	36.2666	3.06464e-247	5.70173e-246	555.356	CLEC4D
ENSG00000115310	0.078217	6.08071	36.2637	3.31603e-247	6.1615e-246	555.244	RTN4
ENSG00000143499	-0.102775	4.72887	-36.2526	4.47037e-247	8.29572e-246	555.023	SMYD2
ENSG00000156804	-0.141296	3.86638	-36.2398	6.30237e-247	1.16804e-245	554.694	FBXO32
ENSG00000134313	0.0745039	7.64403	36.2301	8.18248e-247	1.51454e-245	554.359	KIDINS220
ENSG00000198874	-0.0829286	4.18503	-36.2248	9.43229e-247	1.74365e-245	554.288	TYW1
ENSG00000101336	0.164662	8.4493	36.2101	1.40013e-246	2.58496e-245	553.852	HCK
ENSG00000196547	0.125348	6.80108	36.2019	1.74507e-246	3.21769e-245	553.597	MAN2A2
ENSG00000108946	0.112616	8.4672	36.1997	1.8501e-246	3.40702e-245	553.566	PRKAR1A
ENSG00000103423	-0.0967963	4.43657	-36.179	3.22586e-246	5.93295e-245	553.057	DNAJA3
ENSG00000177885	0.106249	7.87538	36.1789	3.23741e-246	5.94663e-245	552.995	GRB2
ENSG00000156502	-0.0910555	3.8975	-36.1583	5.63654e-246	1.03403e-244	552.507	SUPV3L1
ENSG00000100906	0.114863	6.74792	36.1522	6.63857e-246	1.21631e-244	552.26	NFKBIA
ENSG00000159339	0.21763	5.5339	36.138	9.70507e-246	1.7759e-244	551.886	PADI4
ENSG00000140396	0.100216	7.80267	36.123	1.45238e-245	2.65431e-244	551.493	NCOA2
ENSG00000106608	-0.102522	3.97317	-36.1131	1.89742e-245	3.46326e-244	551.295	URGCP
ENSG00000135823	0.0657676	5.95223	36.0937	3.18788e-245	5.81135e-244	550.681	STX6
ENSG00000130066	0.130781	7.98741	36.0854	3.98256e-245	7.25086e-244	550.495	SAT1
ENSG00000100985	0.328775	4.78703	36.0841	4.12418e-245	7.49926e-244	550.463	MMP9
ENSG00000206053	-0.0822352	4.13137	-36.054	9.24673e-245	1.67928e-243	549.71	HN1L
ENSG00000090316	0.0995624	5.62782	36.0535	9.38356e-245	1.70199e-243	549.607	MAEA
ENSG00000186532	-0.093487	4.16022	-36.0516	9.85113e-245	1.78456e-243	549.648	SMYD4
ENSG00000196209	0.181039	5.6755	36.0409	1.31428e-244	2.37788e-243	549.277	SIRPB2
ENSG00000171988	0.114316	8.78561	36.0062	3.32697e-244	6.01184e-243	548.386	JMJD1C
ENSG00000113163	0.0691876	6.78185	36.0036	3.5701e-244	6.44311e-243	548.274	COL4A3BP
ENSG00000101596	0.131823	10.4182	35.9917	4.91019e-244	8.85058e-243	548.028	SMCHD1
ENSG00000124198	-0.0615279	6.13091	-35.9884	5.37308e-244	9.67288e-243	547.884	ARFGEF2
ENSG00000092531	0.106115	7.19389	35.9662	9.71907e-244	1.7475e-242	547.285	SNAP23
ENSG00000109103	0.10226	5.91296	35.9658	9.82942e-244	1.76514e-242	547.26	UNC119
ENSG00000170113	-0.121894	4.18587	-35.9643	1.02432e-243	1.83718e-242	547.311	NIPA1
ENSG00000003756	0.0479946	8.13756	35.9641	1.02825e-243	1.84193e-242	547.236	RBM5
ENSG00000082458	-0.186362	2.71365	-35.9049	5.01491e-243	8.97223e-242	545.619	DLG3
ENSG00000105778	0.0585251	6.74465	35.8999	5.73862e-243	1.02543e-241	545.497	AVL9
ENSG00000167536	0.154947	4.58898	35.8983	5.99738e-243	1.07035e-241	545.47	DHRS13
ENSG00000105856	0.092011	7.40716	35.8922	7.05274e-243	1.25715e-241	545.306	HBP1
ENSG00000083828	0.0717017	5.65118	35.8886	7.76273e-243	1.382e-241	545.194	ZNF586
ENSG00000151065	-0.106556	3.31058	-35.8847	8.60778e-243	1.53055e-241	545.174	DCP1B
ENSG00000176463	0.112131	6.0589	35.8756	1.0987e-242	1.95121e-241	544.849	SLCO3A1
ENSG00000168685	-0.136823	9.27905	-35.8651	1.45502e-242	2.58084e-241	544.599	IL7R
ENSG00000176597	0.171245	4.09442	35.849	2.24077e-242	3.96968e-241	544.166	B3GNT5
ENSG00000159433	-0.188936	4.36286	-35.8488	2.25106e-242	3.98302e-241	544.227	STARD9
ENSG00000196189	0.174287	5.68455	35.8454	2.46273e-242	4.35223e-241	544.049	SEMA4A
ENSG00000170734	-0.0892948	4.70075	-35.8402	2.82985e-242	4.99491e-241	543.979	POLH
ENSG00000214293	0.107016	2.68209	35.8294	3.7865e-242	6.67532e-241	543.698	APTR
ENSG00000135040	-0.0776909	4.656	-35.8063	7.004e-242	1.23325e-240	543.072	NAA35
ENSG00000138814	0.0885948	6.15245	35.8035	7.56388e-242	1.33021e-240	542.92	PPP3CA
ENSG00000169045	-0.0722285	8.45736	-35.7919	1.03025e-241	1.80963e-240	542.628	HNRNPH1
ENSG00000099810	-0.0886856	4.95841	-35.7895	1.09897e-241	1.928e-240	542.615	MTAP
ENSG00000247287	-0.177563	2.77782	-35.7857	1.21647e-241	2.13156e-240	542.45
ENSG00000117676	0.112695	7.48195	35.7748	1.62733e-241	2.84803e-240	542.175	RPS6KA1
ENSG00000162408	-0.0919109	4.77409	-35.7672	1.99166e-241	3.48143e-240	542.028	NOL9
ENSG00000033170	-0.116064	4.55509	-35.7465	3.46189e-241	6.04409e-240	541.489	FUT8
ENSG00000136238	0.0946711	6.81503	35.724	6.31395e-241	1.10102e-239	540.807	RAC1
ENSG00000198431	0.0992995	6.8018	35.7214	6.7744e-241	1.17989e-239	540.738	TXNRD1
ENSG00000132849	-0.132878	6.16176	-35.7113	8.8677e-241	1.54262e-239	540.505	PATJ
ENSG00000182134	-0.141996	2.38052	-35.6923	1.47109e-240	2.55602e-239	539.908	TDRKH
ENSG00000169902	0.244999	3.37166	35.6876	1.66929e-240	2.89692e-239	539.879	TPST1
ENSG00000163171	0.120482	7.12467	35.6864	1.72201e-240	2.98482e-239	539.814	CDC42EP3
ENSG00000198205	-0.133198	3.77704	-35.68	2.04354e-240	3.53789e-239	539.725	ZXDA
ENSG00000143337	0.0776417	6.99306	35.6682	2.79653e-240	4.83573e-239	539.321	TOR1AIP1
ENSG00000176407	0.0596789	5.85609	35.658	3.6711e-240	6.34044e-239	539.04	KCMF1
ENSG00000158769	0.137095	5.87523	35.6482	4.7756e-240	8.23819e-239	538.783	F11R
ENSG00000100612	0.10581	6.30306	35.6435	5.40964e-240	9.32083e-239	538.658	DHRS7
ENSG00000116514	0.130226	4.94752	35.6385	6.18069e-240	1.06367e-238	538.53	RNF19B
ENSG00000011422	0.162274	5.48324	35.6357	6.6677e-240	1.14611e-238	538.453	PLAUR
ENSG00000116455	-0.0907974	3.88722	-35.629	7.9567e-240	1.36606e-238	538.369	WDR77
ENSG00000214212	0.135665	4.94514	35.6252	8.8051e-240	1.50992e-238	538.18	C19orf38
ENSG00000150347	-0.102282	5.8264	-35.6155	1.14113e-239	1.95452e-238	537.951	ARID5B
ENSG00000185261	0.166026	5.04388	35.6152	1.14986e-239	1.96715e-238	537.912	KIAA0825
ENSG00000096433	-0.165467	4.92324	-35.6152	1.15203e-239	1.96852e-238	537.987	ITPR3
ENSG00000144749	-0.130406	4.73949	-35.6148	1.16311e-239	1.98512e-238	537.977	LRIG1
ENSG00000138764	0.106618	6.09712	35.605	1.50928e-239	2.5729e-238	537.632	CCNG2
ENSG00000184005	0.13618	2.43704	35.5893	2.29199e-239	3.90259e-238	537.302	ST6GALNAC3
ENSG00000167721	-0.0873839	4.5136	-35.5824	2.76054e-239	4.69487e-238	537.112	TSR1
ENSG00000079134	-0.101339	4.85773	-35.5717	3.671e-239	6.23595e-238	536.817	THOC1
ENSG00000243335	-0.0943315	5.23142	-35.5693	3.90435e-239	6.62457e-238	536.739	KCTD7
ENSG00000163466	0.0805564	8.39547	35.5692	3.91633e-239	6.6342e-238	536.711	ARPC2
ENSG00000139116	-0.206577	3.84989	-35.5692	3.91921e-239	6.6342e-238	536.773	KIF21A
ENSG00000087269	-0.0885432	4.5217	-35.5617	4.78596e-239	8.09191e-238	536.562	NOP14
ENSG00000163191	0.177581	6.07062	35.5505	6.44356e-239	1.08818e-237	536.192	S100A11
ENSG00000198455	-0.123729	3.09463	-35.5362	9.42774e-239	1.59028e-237	535.87	ZXDB
ENSG00000108788	0.0680921	5.46068	35.5338	1.005e-238	1.69327e-237	535.736	MLX
ENSG00000048392	0.123966	6.22094	35.5043	2.20543e-238	3.71148e-237	534.956	RRM2B
ENSG00000160785	0.133849	5.24093	35.5018	2.35504e-238	3.95866e-237	534.889	SLC25A44
ENSG00000178562	-0.157761	6.22702	-35.4989	2.54489e-238	4.27281e-237	534.859	CD28
ENSG00000000938	0.119795	8.16791	35.4975	2.64698e-238	4.43906e-237	534.803	FGR
ENSG00000089053	-0.0455204	6.7902	-35.491	3.14144e-238	5.26219e-237	534.604	ANAPC5
ENSG00000129292	0.0960666	7.80787	35.4723	5.17071e-238	8.65136e-237	534.124	PHF20L1
ENSG00000065882	0.0997433	6.95933	35.469	5.6384e-238	9.42297e-237	534.022	TBC1D1
ENSG00000268170	0.219089	2.12874	35.469	5.64749e-238	9.42726e-237	534.1
ENSG00000173208	-0.17128	5.27189	-35.4612	6.9482e-238	1.15851e-236	533.885	ABCD2
ENSG00000064225	0.133362	4.05019	35.4592	7.31876e-238	1.21889e-236	533.783	ST3GAL6
ENSG00000173258	-0.168536	4.2574	-35.4337	1.44181e-237	2.39849e-236	533.177	ZNF483
ENSG00000137845	0.0791426	7.95744	35.4168	2.25926e-237	3.75401e-236	532.651	ADAM10
ENSG00000100697	0.104714	8.21767	35.4128	2.51347e-237	4.17161e-236	532.554	DICER1
ENSG00000137767	0.116259	6.60246	35.4061	3.00738e-237	4.98562e-236	532.348	SQRDL
ENSG00000163564	-0.166915	5.42086	-35.3971	3.8143e-237	6.3161e-236	532.174	PYHIN1
ENSG00000099204	-0.124825	6.92217	-35.3832	5.52685e-237	9.14143e-236	531.763	ABLIM1
ENSG00000089220	-0.12641	5.15323	-35.3815	5.77317e-237	9.53794e-236	531.764	PEBP1
ENSG00000118508	0.124768	4.64346	35.3815	5.78084e-237	9.53971e-236	531.702	RAB32
ENSG00000158711	-0.0745806	7.04318	-35.3786	6.24452e-237	1.02931e-235	531.626	ELK4
ENSG00000027001	-0.121455	2.51801	-35.3746	6.94091e-237	1.1428e-235	531.511	MIPEP
ENSG00000129450	0.146073	5.24848	35.3745	6.95964e-237	1.14458e-235	531.509	SIGLEC9
ENSG00000147364	-0.095281	4.33466	-35.3737	7.1087e-237	1.16777e-235	531.574	FBXO25
ENSG00000217555	0.132131	4.88081	35.3675	8.37042e-237	1.37347e-235	531.328	CKLF
ENSG00000156675	0.152135	8.32428	35.3645	9.07722e-237	1.48776e-235	531.28	RAB11FIP1
ENSG00000140332	0.162521	6.55517	35.3582	1.07307e-236	1.75678e-235	531.083	TLE3
ENSG00000204116	-0.157972	4.01646	-35.35	1.33481e-236	2.1828e-235	530.956	CHIC1
ENSG00000148843	-0.089731	5.04419	-35.3286	2.35464e-236	3.84617e-235	530.353	PDCD11
ENSG00000167699	-0.0879821	4.82364	-35.3152	3.36199e-236	5.48543e-235	530.003	GLOD4
ENSG00000107742	-0.130937	6.75587	-35.3113	3.72272e-236	6.06714e-235	529.864	SPOCK2
ENSG00000036549	-0.093698	5.73407	-35.2979	5.31506e-236	8.65253e-235	529.516	ZZZ3
ENSG00000122965	-0.0968887	4.98914	-35.2871	7.07815e-236	1.15098e-234	529.258	RBM19
ENSG00000058272	0.0824012	7.67289	35.2752	9.70155e-236	1.57579e-234	528.89	PPP1R12A
ENSG00000100034	0.146078	7.0126	35.274	1.00398e-235	1.6289e-234	528.855	PPM1F
ENSG00000175054	-0.083519	6.91284	-35.2672	1.20143e-235	1.94707e-234	528.675	ATR
ENSG00000140932	0.200818	4.94575	35.2654	1.25836e-235	2.03705e-234	528.627	CMTM2
ENSG00000139436	0.0873344	7.16401	35.2336	2.93041e-235	4.73848e-234	527.777	GIT2
ENSG00000245937	-0.13633	4.83298	-35.2302	3.2063e-235	5.17881e-234	527.763	LINC01184
ENSG00000197603	-0.116097	4.92811	-35.2248	3.69443e-235	5.96057e-234	527.613	C5orf42
ENSG00000204946	-0.107684	4.15436	-35.2235	3.8222e-235	6.15984e-234	527.603	ZNF783
ENSG00000116127	-0.0908029	6.7735	-35.2102	5.43866e-235	8.75515e-234	527.17	ALMS1
ENSG00000049245	0.08997	5.94281	35.2095	5.53772e-235	8.90471e-234	527.13	VAMP3
ENSG00000117298	0.154281	6.75818	35.2094	5.55373e-235	8.92052e-234	527.143	ECE1
ENSG00000267554	-0.161146	3.40858	-35.1982	7.48233e-235	1.20049e-233	526.922
ENSG00000160185	-0.163973	4.56852	-35.189	9.55223e-235	1.5309e-233	526.687	UBASH3A
ENSG00000145819	0.162937	8.07174	35.1779	1.28034e-234	2.04967e-233	526.334	ARHGAP26
ENSG00000111321	0.13096	4.26374	35.1669	1.71297e-234	2.73924e-233	526.03	LTBR
ENSG00000152495	-0.162728	6.79003	-35.1402	3.47537e-234	5.55138e-233	525.339	CAMK4
ENSG00000109762	-0.163845	3.56117	-35.1274	4.8824e-234	7.79028e-233	525.056	SNX25
ENSG00000108559	-0.100043	4.73454	-35.1205	5.86373e-234	9.34576e-233	524.856	NUP88
ENSG00000103037	-0.117829	3.32596	-35.1125	7.2376e-234	1.15228e-232	524.66	SETD6
ENSG00000166750	-0.114215	7.63964	-35.0994	1.02237e-233	1.6259e-232	524.241	SLFN5
ENSG00000203814	0.1252	6.04818	35.0928	1.21965e-233	1.9375e-232	524.045	HIST2H2BF
ENSG00000157514	0.151799	7.92176	35.0823	1.60856e-233	2.55251e-232	523.802	TSC22D3
ENSG00000198734	0.198878	5.58248	35.0816	1.64066e-233	2.60058e-232	523.757	F5
ENSG00000172007	0.115788	4.92764	35.0791	1.75025e-233	2.77126e-232	523.691	RAB33B
ENSG00000126262	0.187277	6.73118	35.0741	1.99955e-233	3.16253e-232	523.567	FFAR2
ENSG00000163220	0.21865	10.6087	35.0708	2.18396e-233	3.45041e-232	523.554	S100A9
ENSG00000148660	0.098988	6.16715	35.045	4.31477e-233	6.80943e-232	522.78	CAMK2G
ENSG00000143390	-0.0728542	5.72286	-35.0338	5.81051e-233	9.15995e-232	522.521	RFX5
ENSG00000112118	-0.100544	5.09608	-35.0221	7.90771e-233	1.24525e-231	522.245	MCM3
ENSG00000008516	0.236351	6.66311	35.0106	1.0727e-232	1.68738e-231	521.898	MMP25
ENSG00000086102	-0.0639173	5.30899	-35.0063	1.20026e-232	1.88597e-231	521.806	NFX1
ENSG00000112053	0.20742	2.43634	35.0003	1.4058e-232	2.20655e-231	521.682	SLC26A8
ENSG00000135679	0.106011	7.20762	34.9916	1.77013e-232	2.77538e-231	521.385	MDM2
ENSG00000008277	-0.197681	2.58281	-34.9459	5.91516e-232	9.2643e-231	520.163	ADAM22
ENSG00000169914	-0.100595	3.93898	-34.9366	7.57306e-232	1.18481e-230	520.025	OTUD3
ENSG00000232593	-0.119653	4.46313	-34.926	9.99937e-232	1.56271e-230	519.739	KANTR
ENSG00000112763	0.0877907	5.6654	34.9045	1.76307e-231	2.75237e-230	519.073	BTN2A1
ENSG00000111203	-0.0950437	4.60774	-34.9029	1.84055e-231	2.87023e-230	519.118	ITFG2
ENSG00000065150	-0.0792126	5.72227	-34.8966	2.17149e-231	3.38265e-230	518.906	IPO5
ENSG00000145734	-0.0788958	6.83196	-34.8755	3.79655e-231	5.90775e-230	518.325	BDP1
ENSG00000065243	0.105232	6.89155	34.8663	4.8337e-231	7.51354e-230	518.076	PKN2
ENSG00000125753	0.146058	7.83655	34.8652	4.976e-231	7.72644e-230	518.071	VASP
ENSG00000181444	0.153471	3.00141	34.8552	6.47158e-231	1.00379e-229	517.847	ZNF467
ENSG00000178104	-0.0909593	5.8095	-34.8496	7.50205e-231	1.16238e-229	517.67	PDE4DIP
ENSG00000165025	0.113876	7.98071	34.8468	8.08546e-231	1.25143e-229	517.583	SYK
ENSG00000119321	0.0772745	6.83521	34.8456	8.34764e-231	1.29062e-229	517.524	FKBP15
ENSG00000120458	-0.105033	3.74422	-34.8276	1.34227e-230	2.07306e-229	517.157	MSANTD2
ENSG00000111802	0.11756	6.0175	34.8264	1.38337e-230	2.13425e-229	517.018	TDP2
ENSG00000146425	0.0959996	5.35422	34.8184	1.70835e-230	2.63283e-229	516.807	DYNLT1
ENSG00000166860	-0.102851	3.69543	-34.8177	1.74242e-230	2.68247e-229	516.897	ZBTB39
ENSG00000185963	0.0897986	6.47151	34.813	1.9714e-230	3.03176e-229	516.663	BICD2
ENSG00000116120	-0.0944382	4.17657	-34.8097	2.15225e-230	3.30636e-229	516.677	FARSB
ENSG00000163900	-0.0808385	4.0479	-34.807	2.30559e-230	3.53818e-229	516.61	TMEM41A
ENSG00000135842	0.207855	9.3203	34.7959	3.08968e-230	4.73642e-229	516.286	FAM129A
ENSG00000178935	0.0869932	4.27675	34.7851	4.10883e-230	6.29208e-229	515.96	ZNF552
ENSG00000114480	0.0928162	4.82228	34.7828	4.36834e-230	6.68241e-229	515.879	GBE1
ENSG00000198169	-0.104774	3.42107	-34.7428	1.25283e-229	1.91447e-228	514.924	ZNF251
ENSG00000143669	0.118033	10.1	34.7248	2.0093e-229	3.0672e-228	514.419	LYST
ENSG00000109756	0.12241	6.86412	34.7242	2.04292e-229	3.11523e-228	514.338	RAPGEF2
ENSG00000109854	0.0945269	4.89814	34.714	2.67068e-229	4.06822e-228	514.068	HTATIP2
ENSG00000118520	0.282009	2.52699	34.7131	2.73624e-229	4.1637e-228	514.115	ARG1
ENSG00000090487	0.0770154	6.06354	34.7069	3.21874e-229	4.89275e-228	513.869	SPG21
ENSG00000142867	0.0729238	5.15322	34.6973	4.14198e-229	6.28954e-228	513.626	BCL10
ENSG00000145982	-0.104252	3.71325	-34.6929	4.65938e-229	7.06779e-228	513.616	FARS2
ENSG00000124374	-0.163822	3.27394	-34.6894	5.09896e-229	7.72647e-228	513.504	PAIP2B
ENSG00000131437	-0.135672	3.5786	-34.6884	5.24282e-229	7.93614e-228	513.496	KIF3A
ENSG00000140598	-0.0751064	4.42364	-34.6685	8.84871e-229	1.33804e-227	512.953	EFL1
ENSG00000102043	-0.144315	2.27642	-34.6613	1.0677e-228	1.61282e-227	512.652	MTMR8
ENSG00000071054	0.103828	7.47597	34.6611	1.07512e-228	1.62233e-227	512.687	MAP4K4
ENSG00000132823	0.100349	5.53068	34.6522	1.35585e-228	2.04382e-227	512.436	OSER1
ENSG00000185129	-0.100649	6.12018	-34.6516	1.3786e-228	2.07595e-227	512.457	PURA
ENSG00000198780	-0.185655	4.035	-34.6448	1.64873e-228	2.48013e-227	512.354	FAM169A
ENSG00000015475	0.103693	6.18635	34.635	2.13342e-228	3.20589e-227	511.984	BID
ENSG00000281162	0.226172	3.84042	34.6213	3.05477e-228	4.58565e-227	511.662	LINC01127
ENSG00000254477	0.137943	1.42862	34.6131	3.79395e-228	5.68936e-227	511.522
ENSG00000168310	0.0992298	5.42074	34.605	4.69183e-228	7.02851e-227	511.197	IRF2
ENSG00000113569	-0.0665898	5.25929	-34.5913	6.72622e-228	1.00656e-226	510.888	NUP155
ENSG00000100596	0.0981536	7.21547	34.5867	7.57655e-228	1.13264e-226	510.731	SPTLC2
ENSG00000114656	0.170959	3.00531	34.5768	9.84946e-228	1.47091e-226	510.523	KIAA1257
ENSG00000119820	0.0688448	6.8031	34.5713	1.1357e-227	1.6943e-226	510.316	YIPF4
ENSG00000121057	-0.104989	3.63853	-34.5701	1.17255e-227	1.74746e-226	510.396	AKAP1
ENSG00000248049	-0.126643	3.72038	-34.5643	1.36631e-227	2.03413e-226	510.243	UBA6-AS1
ENSG00000104870	0.147943	6.69136	34.5589	1.57352e-227	2.3402e-226	510.003	FCGRT
ENSG00000066336	0.170542	5.1838	34.5544	1.77267e-227	2.63368e-226	509.884	SPI1
ENSG00000138433	0.101866	5.30268	34.5253	3.80683e-227	5.65005e-226	509.108	CIR1
ENSG00000126001	-0.0865944	5.68767	-34.5189	4.4923e-227	6.66058e-226	508.985	CEP250
ENSG00000189180	0.0829841	7.28935	34.5182	4.57524e-227	6.77661e-226	508.934	ZNF33A
ENSG00000188641	0.0918318	8.25429	34.5162	4.8328e-227	7.15076e-226	508.9	DPYD
ENSG00000183283	0.0969638	8.48373	34.4995	7.47639e-227	1.1051e-225	508.47	DAZAP2
ENSG00000139266	-0.139515	2.75359	-34.4923	9.04463e-227	1.33554e-225	508.298	2025-03-09
ENSG00000124243	-0.179371	3.35666	-34.4753	1.41161e-226	2.08227e-225	507.894	BCAS4
ENSG00000118420	-0.140178	2.76239	-34.4679	1.71541e-226	2.52782e-225	507.662	UBE3D
ENSG00000182782	0.191536	5.57529	34.4667	1.76993e-226	2.60551e-225	507.579	HCAR2
ENSG00000135426	-0.14276	5.13517	-34.4625	1.97242e-226	2.90065e-225	507.546	TESPA1
ENSG00000143797	0.167098	6.14398	34.4611	2.04678e-226	3.00694e-225	507.435	MBOAT2
ENSG00000178199	-0.156433	4.30306	-34.4393	3.62298e-226	5.31713e-225	506.967	ZC3H12D
ENSG00000093183	-0.0684911	5.1009	-34.4313	4.47653e-226	6.56315e-225	506.702	SEC22C
ENSG00000123636	0.132842	8.18044	34.4114	7.53963e-226	1.10429e-224	506.161	BAZ2B
ENSG00000186260	-0.131497	3.88982	-34.4104	7.73902e-226	1.13234e-224	506.213	MKL2
ENSG00000111859	0.132815	6.83931	34.4088	8.06445e-226	1.17876e-224	506.067	NEDD9
ENSG00000109452	-0.147427	7.16448	-34.3997	1.02297e-225	1.49375e-224	505.852	INPP4B
ENSG00000105176	-0.108702	5.45715	-34.3991	1.04023e-225	1.51741e-224	505.861	URI1
ENSG00000117868	-0.0706243	7.03795	-34.3985	1.05638e-225	1.53942e-224	505.797	ESYT2
ENSG00000110080	0.154299	3.91966	34.3875	1.41003e-225	2.05271e-224	505.534	ST3GAL4
ENSG00000167703	0.156586	6.27885	34.3651	2.52875e-225	3.67763e-224	504.924	SLC43A2
ENSG00000108433	-0.0677389	6.03628	-34.3651	2.53247e-225	3.67934e-224	504.939	GOSR2
ENSG00000140943	-0.0507172	6.35686	-34.3285	6.60267e-225	9.58316e-224	503.968	MBTPS1
ENSG00000186020	-0.11741	3.9722	-34.2867	1.96604e-224	2.85065e-223	502.981	ZNF529
ENSG00000035862	0.166179	4.74484	34.252	4.87671e-224	7.06391e-223	501.971	TIMP2
ENSG00000136536	0.087022	7.93439	34.2489	5.28201e-224	7.64332e-223	501.904	2025-03-07
ENSG00000125459	-0.12062	3.30297	-34.2431	6.15524e-224	8.89801e-223	501.837	MSTO1
ENSG00000164151	-0.0583703	5.96448	-34.2396	6.7447e-224	9.74039e-223	501.659	ICE1
ENSG00000142347	0.151937	8.86094	34.2196	1.13652e-223	1.63968e-222	501.169	MYO1F
ENSG00000114573	0.136745	7.44924	34.2159	1.25243e-223	1.8051e-222	501.04	ATP6V1A
ENSG00000260078	0.163912	4.06443	34.2117	1.39813e-223	2.01308e-222	500.936
ENSG00000155966	0.164142	3.94199	34.2019	1.80361e-223	2.59432e-222	500.685	AFF2
ENSG00000157350	0.113249	6.38482	34.1653	4.69519e-223	6.74689e-222	499.7	ST3GAL2
ENSG00000171700	0.109035	5.84529	34.1615	5.18481e-223	7.44306e-222	499.6	RGS19
ENSG00000185728	0.0638818	6.74563	34.1614	5.19215e-223	7.4462e-222	499.596	YTHDF3
ENSG00000100722	-0.0661778	5.2048	-34.1603	5.34713e-223	7.66086e-222	499.621	ZC3H14
ENSG00000130844	-0.120591	3.59071	-34.1589	5.54287e-223	7.93344e-222	499.65	ZNF331
ENSG00000135365	0.131637	5.91951	34.1424	8.52553e-223	1.21904e-221	499.101	PHF21A
ENSG00000163812	0.0642821	6.37882	34.1398	9.1251e-223	1.30348e-221	499.028	ZDHHC3
ENSG00000158417	-0.087909	4.66069	-34.138	9.56372e-223	1.36479e-221	499.072	EIF5B
ENSG00000104154	-0.161786	2.84882	-34.1313	1.13952e-222	1.62455e-221	498.884	SLC30A4
ENSG00000259642	0.124221	2.19284	34.1244	1.36388e-222	1.94249e-221	498.742	ST20-AS1
ENSG00000187607	-0.132219	3.9073	-34.1231	1.41065e-222	2.00712e-221	498.717	ZNF286A
ENSG00000141526	0.172991	7.16919	34.1186	1.58664e-222	2.25531e-221	498.507	SLC16A3
ENSG00000163131	0.120609	10.6216	34.1022	2.43347e-222	3.45562e-221	498.142	CTSS
ENSG00000173744	0.0772072	6.84778	34.0995	2.6096e-222	3.7021e-221	497.986	AGFG1
ENSG00000101391	-0.0755174	4.24306	-34.0921	3.16172e-222	4.48096e-221	497.893	CDK5RAP1
ENSG00000223969	0.146085	1.56607	34.0906	3.2916e-222	4.66047e-221	497.869
ENSG00000240891	-0.118565	4.78747	-34.0774	4.63762e-222	6.55983e-221	497.498	PLCXD2
ENSG00000101935	-0.0924754	4.1311	-34.0543	8.48589e-222	1.19914e-220	496.915	AMMECR1
ENSG00000177156	0.169661	8.25384	34.0531	8.73669e-222	1.23338e-220	496.823	TALDO1
ENSG00000135763	-0.0946716	3.74395	-34.0514	9.14049e-222	1.28912e-220	496.851	URB2
ENSG00000175455	-0.0901486	5.73675	-34.0294	1.62032e-221	2.28297e-220	496.202	CCDC14
ENSG00000259834	-0.148022	5.10767	-34.0059	2.99055e-221	4.20948e-220	495.634
ENSG00000132824	0.0758898	6.96594	34.0054	3.02765e-221	4.25756e-220	495.539	SERINC3
ENSG00000175322	-0.150635	3.22329	-34.0007	3.42287e-221	4.80865e-220	495.521	ZNF519
ENSG00000075711	-0.0668993	5.76259	-34.0004	3.44967e-221	4.8416e-220	495.438	DLG1
ENSG00000108474	-0.11956	3.53661	-33.9842	5.25815e-221	7.37263e-220	495.105	PIGL
ENSG00000236345	0.145419	1.57902	33.9743	6.8013e-221	9.52709e-220	494.844
ENSG00000101224	-0.160544	4.56348	-33.9547	1.13308e-220	1.58565e-219	494.326	CDC25B
ENSG00000174840	-0.062565	4.96521	-33.9167	3.04122e-220	4.25183e-219	493.296	PDE12
ENSG00000108599	0.0543075	6.18275	33.9091	3.70318e-220	5.17228e-219	493.028	AKAP10
ENSG00000100731	0.100725	8.71798	33.9046	4.16543e-220	5.8123e-219	492.96	PCNX1
ENSG00000236088	-0.115348	4.29725	-33.898	4.94824e-220	6.89795e-219	492.854	COX10-AS1
ENSG00000139644	0.0696712	9.00131	33.8762	8.7132e-220	1.21347e-218	492.224	TMBIM6
ENSG00000277701	-0.161952	4.65721	-33.8553	1.50062e-219	2.08787e-218	491.742
ENSG00000182700	-0.117305	3.76987	-33.8498	1.73122e-219	2.40639e-218	491.617	IGIP
ENSG00000261596	0.116838	2.47271	33.8465	1.88714e-219	2.62061e-218	491.511
ENSG00000101464	-0.0987954	2.80859	-33.8449	1.96352e-219	2.72406e-218	491.464	PIGU
ENSG00000143409	0.148183	5.37513	33.8427	2.08142e-219	2.88486e-218	491.312	FAM63A
ENSG00000189067	0.167292	9.11679	33.8272	3.11406e-219	4.31196e-218	490.972	LITAF
ENSG00000171793	-0.0934257	4.11276	-33.812	4.61985e-219	6.39087e-218	490.626	CTPS1
ENSG00000148926	0.214879	4.57743	33.8102	4.83733e-219	6.68532e-218	490.491	ADM
ENSG00000101096	-0.147885	5.44024	-33.8018	6.02018e-219	8.3121e-218	490.319	NFATC2
ENSG00000051620	0.114193	6.62638	33.8007	6.18244e-219	8.52799e-218	490.227	HEBP2
ENSG00000189007	-0.127587	3.31568	-33.766	1.52273e-218	2.09844e-217	489.442	ADAT2
ENSG00000005302	0.0759456	6.13354	33.7519	2.1945e-218	3.0213e-217	488.952	MSL3
ENSG00000136689	0.170912	4.8488	33.7484	2.4007e-218	3.30205e-217	488.878	IL1RN
ENSG00000125900	0.130373	2.01929	33.7476	2.45573e-218	3.37453e-217	488.959	SIRPD
ENSG00000114626	0.170333	6.90176	33.7466	2.51704e-218	3.45549e-217	488.84	ABTB1
ENSG00000257743	0.244359	3.6859	33.7465	2.52762e-218	3.46672e-217	488.86	MGAM2
ENSG00000103494	-0.152661	2.26629	-33.7341	3.48005e-218	4.7685e-217	488.503	RPGRIP1L
ENSG00000166326	-0.0662806	6.3617	-33.731	3.77048e-218	5.16156e-217	488.435	TRIM44
ENSG00000103381	0.165796	8.42756	33.7308	3.79043e-218	5.18396e-217	488.461	CPPED1
ENSG00000151503	-0.0765359	4.74675	-33.7261	4.28493e-218	5.85472e-217	488.369	NCAPD3
ENSG00000137449	0.112173	5.24288	33.7226	4.695e-218	6.40896e-217	488.2	CPEB2
ENSG00000144566	0.0807078	5.70504	33.7159	5.57414e-218	7.60186e-217	488.022	RAB5A
ENSG00000103264	-0.123973	3.32868	-33.713	6.01342e-218	8.19322e-217	488.072	FBXO31
ENSG00000161217	0.0701156	6.48914	33.7035	7.70159e-218	1.04834e-216	487.699	PCYT1A
ENSG00000238105	-0.158265	3.77769	-33.692	1.03653e-217	1.4096e-216	487.532	GOLGA2P5
ENSG00000127804	-0.107455	3.8859	-33.6864	1.19718e-217	1.62655e-216	487.385	METTL16
ENSG00000100055	0.117335	8.29916	33.6786	1.46539e-217	1.98908e-216	487.098	CYTH4
ENSG00000198648	-0.124164	4.38972	-33.6732	1.68476e-217	2.28469e-216	487.029	STK39
ENSG00000186074	0.111508	5.2662	33.665	2.08556e-217	2.82558e-216	486.708	CD300LF
ENSG00000189159	0.123937	5.75429	33.661	2.31503e-217	3.13353e-216	486.603	HN1
ENSG00000128016	0.119662	5.239	33.6586	2.46196e-217	3.32928e-216	486.545	ZFP36
ENSG00000093000	0.0812853	7.55059	33.6511	2.99131e-217	4.04135e-216	486.362	NUP50
ENSG00000167552	0.146231	7.71549	33.6506	3.02681e-217	4.08548e-216	486.366	TUBA1A
ENSG00000234420	-0.0825358	5.78304	-33.6331	4.76765e-217	6.42921e-216	485.92	ZNF37BP
ENSG00000225889	0.161381	4.98664	33.6326	4.82148e-217	6.49574e-216	485.877
ENSG00000213523	0.0827464	4.34007	33.6286	5.3505e-217	7.20175e-216	485.795	SRA1
ENSG00000101695	-0.0888721	5.28498	-33.6253	5.82926e-217	7.83887e-216	485.743	RNF125
ENSG00000130779	0.0748897	6.27966	33.6209	6.53183e-217	8.77548e-216	485.563	CLIP1
ENSG00000047644	0.124684	5.74515	33.6199	6.70518e-217	9.00001e-216	485.54	WWC3
ENSG00000110315	0.121536	6.50694	33.618	7.04755e-217	9.45077e-216	485.496	RNF141
ENSG00000085514	0.14435	4.58305	33.6175	7.1395e-217	9.56521e-216	485.495	PILRA
ENSG00000110448	-0.163121	4.67291	-33.5998	1.1266e-216	1.50797e-215	485.134	CD5
ENSG00000129197	-0.0961982	4.86216	-33.5976	1.193e-216	1.59538e-215	485.048	RPAIN
ENSG00000273247	0.0860671	4.58057	33.5838	1.70414e-216	2.2768e-215	484.629
ENSG00000254876	-0.157208	3.19621	-33.5638	2.86118e-216	3.81913e-215	484.208
ENSG00000204650	-0.144468	3.5773	-33.5617	3.0164e-216	4.0226e-215	484.167	CRHR1-IT1
ENSG00000130713	-0.0961537	4.26619	-33.5532	3.76094e-216	5.01089e-215	483.929	EXOSC2
ENSG00000104375	0.113048	3.75604	33.5484	4.25616e-216	5.66548e-215	483.743	STK3
ENSG00000110876	0.12564	7.65551	33.543	4.89484e-216	6.50965e-215	483.581	SELPLG
ENSG00000132589	0.152874	5.90045	33.5402	5.26328e-216	6.99319e-215	483.488	FLOT2
ENSG00000095787	0.0637239	7.66045	33.5394	5.37395e-216	7.13369e-215	483.477	WAC
ENSG00000287771	0.242827	2.78853	33.5164	9.73443e-216	1.29102e-214	482.944	NA
ENSG00000123066	0.100471	8.48205	33.5041	1.33851e-215	1.77355e-214	482.59	MED13L
ENSG00000141298	0.161827	8.66125	33.4999	1.49161e-215	1.97461e-214	482.498	SSH2
ENSG00000165792	-0.0909078	4.28462	-33.4966	1.6239e-215	2.14776e-214	482.466	METTL17
ENSG00000100523	-0.0868667	6.48022	-33.4937	1.75032e-215	2.31286e-214	482.306	DDHD1
ENSG00000022567	0.167499	6.48746	33.4923	1.81343e-215	2.39406e-214	482.259	SLC45A4
ENSG00000068323	0.127462	5.32387	33.477	2.68993e-215	3.54796e-214	481.856	TFE3
ENSG00000198821	-0.126733	6.78098	-33.4731	2.97768e-215	3.92392e-214	481.785	CD247
ENSG00000204261	0.076666	6.36473	33.4682	3.38116e-215	4.45155e-214	481.621	PSMB8-AS1
ENSG00000245164	-0.157862	6.58059	-33.4626	3.90469e-215	5.13615e-214	481.525	LINC00861
ENSG00000226688	-0.0967601	4.10783	-33.4599	4.18493e-215	5.49975e-214	481.528	ENTPD1-AS1
ENSG00000129187	-0.0734994	4.38831	-33.455	4.74884e-215	6.23518e-214	481.384	DCTD
ENSG00000101457	0.116714	4.04543	33.4535	4.94262e-215	6.48371e-214	481.28	DNTTIP1
ENSG00000167077	-0.12387	3.53053	-33.4459	6.00107e-215	7.86505e-214	481.182	MEI1
ENSG00000196782	0.137664	4.49021	33.4267	9.86062e-215	1.29117e-213	480.572	MAML3
ENSG00000072401	0.172501	5.82557	33.4265	9.92216e-215	1.29805e-213	480.559	UBE2D1
ENSG00000174738	-0.110687	5.52731	-33.4212	1.13565e-214	1.48435e-213	480.475	NR1D2
ENSG00000181847	-0.18794	5.09842	-33.4212	1.13768e-214	1.48566e-213	480.512	TIGIT
ENSG00000060971	0.0800046	5.65858	33.4145	1.35171e-214	1.76357e-213	480.237	ACAA1
ENSG00000153179	0.123395	6.48542	33.4093	1.54291e-214	2.01121e-213	480.113	RASSF3
ENSG00000166938	-0.0833587	4.67358	-33.3961	2.17225e-214	2.82901e-213	479.855	DIS3L
ENSG00000147894	0.121728	7.31762	33.3894	2.57895e-214	3.35565e-213	479.615	C9orf72
ENSG00000164323	-0.123197	5.2668	-33.3848	2.90185e-214	3.7724e-213	479.555	CFAP97
ENSG00000114423	-0.127631	5.54593	-33.3828	3.05577e-214	3.96894e-213	479.489	CBLB
ENSG00000006744	-0.0778115	5.08159	-33.3754	3.69775e-214	4.79844e-213	479.304	ELAC2
ENSG00000168610	0.137304	7.7774	33.3705	4.20032e-214	5.44573e-213	479.139	STAT3
ENSG00000168591	0.0837812	4.57754	33.3689	4.37787e-214	5.67083e-213	479.087	TMUB2
ENSG00000166197	-0.0895699	4.50035	-33.3582	5.75848e-214	7.45252e-213	478.893	NOLC1
ENSG00000075785	0.106273	5.55891	33.3524	6.69708e-214	8.65948e-213	478.64	RAB7A
ENSG00000163932	0.138678	6.03367	33.3377	9.76882e-214	1.262e-212	478.267	PRKCD
ENSG00000109920	-0.0736221	6.44074	-33.3375	9.81526e-214	1.26687e-212	478.28	FNBP4
ENSG00000115594	0.229966	3.52477	33.3334	1.09227e-213	1.40856e-212	478.204	IL1R1
ENSG00000204482	0.121717	7.01966	33.3306	1.17319e-213	1.51155e-212	478.096	LST1
ENSG00000181220	0.142242	5.5827	33.3259	1.3258e-213	1.70666e-212	477.962	ZNF746
ENSG00000138095	-0.0839259	6.11755	-33.3183	1.61186e-213	2.07304e-212	477.796	LRPPRC
ENSG00000134152	0.128806	5.7098	33.3176	1.63986e-213	2.10719e-212	477.75	KATNBL1
ENSG00000233461	0.135304	1.73116	33.3142	1.78973e-213	2.29773e-212	477.787
ENSG00000161298	-0.150835	2.97571	-33.3026	2.41434e-213	3.09687e-212	477.472	ZNF382
ENSG00000139211	-0.136294	3.15213	-33.2822	4.079e-213	5.22748e-212	476.961	AMIGO2
ENSG00000137414	0.1334	7.02928	33.2754	4.86133e-213	6.22457e-212	476.678	FAM8A1
ENSG00000106692	-0.109363	4.63608	-33.2699	5.59425e-213	7.15668e-212	476.621	FKTN
ENSG00000132600	-0.0981893	4.11334	-33.2485	9.70742e-213	1.24077e-211	476.092	PRMT7
ENSG00000175137	0.108653	5.90987	33.2431	1.11497e-212	1.42385e-211	475.833	SH3BP5L
ENSG00000163935	-0.119535	3.97852	-33.2418	1.15241e-212	1.47036e-211	475.928	SFMBT1
ENSG00000118900	0.156775	6.68155	33.2319	1.48714e-212	1.89578e-211	475.558	UBN1
ENSG00000126749	-0.0944323	4.6524	-33.2302	1.55589e-212	1.98167e-211	475.595	EMG1
ENSG00000064651	-0.104322	3.89189	-33.221	1.97121e-212	2.50843e-211	475.392	SLC12A2
ENSG00000075426	0.162795	6.50586	33.2171	2.17553e-212	2.766e-211	475.177	FOSL2
ENSG00000211455	0.101046	6.20222	33.2123	2.46599e-212	3.13255e-211	475.04	STK38L
ENSG00000104814	-0.13388	3.79745	-33.2113	2.52528e-212	3.20504e-211	475.15	MAP4K1
ENSG00000204304	0.106295	6.50589	33.211	2.54553e-212	3.22792e-211	475.01	PBX2
ENSG00000181409	0.208158	4.78563	33.2058	2.9079e-212	3.68418e-211	474.9	AATK
ENSG00000276900	0.15292	3.74714	33.1909	4.27044e-212	5.40574e-211	474.535
ENSG00000141401	0.149879	4.70105	33.1729	6.77093e-212	8.56349e-211	474.045	IMPA2
ENSG00000214029	-0.11712	4.57307	-33.1284	2.12662e-211	2.68728e-210	472.994	ZNF891
ENSG00000218809	0.153736	1.78852	33.1269	2.20703e-211	2.78645e-210	472.972
ENSG00000151413	-0.123058	2.44044	-33.1183	2.75138e-211	3.47068e-210	472.703	NUBPL
ENSG00000197405	0.189999	5.51517	33.1006	4.33274e-211	5.46069e-210	472.186	C5AR1
ENSG00000046651	-0.0905477	5.40386	-33.0946	5.05417e-211	6.36438e-210	472.081	OFD1
ENSG00000115840	-0.0727709	4.24402	-33.0941	5.11958e-211	6.44114e-210	472.117	SLC25A12
ENSG00000105355	0.140855	5.37778	33.0808	7.20594e-211	9.05818e-210	471.674	PLIN3
ENSG00000136444	-0.0922488	4.29861	-33.0798	7.38666e-211	9.27729e-210	471.757	RSAD1
ENSG00000118246	-0.0945973	4.99766	-33.0661	1.05072e-210	1.31851e-209	471.371	FASTKD2
ENSG00000130338	-0.101502	4.98282	-33.0616	1.17823e-210	1.47723e-209	471.259	TULP4
ENSG00000205352	0.101117	4.1589	33.0589	1.26435e-210	1.58384e-209	471.141	PRR13
ENSG00000122507	-0.0929138	4.57459	-33.0556	1.37527e-210	1.72129e-209	471.121	BBS9
ENSG00000110880	0.117634	6.7301	33.0537	1.44488e-210	1.80685e-209	470.982	CORO1C
ENSG00000163788	0.0812649	7.99892	33.0535	1.45024e-210	1.81199e-209	470.996	SNRK
ENSG00000028203	-0.079579	4.84744	-33.0427	1.91444e-210	2.38991e-209	470.773	VEZT
ENSG00000008086	0.126574	4.57274	33.0424	1.92717e-210	2.40373e-209	470.701	CDKL5
ENSG00000084676	0.114257	7.75662	33.0277	2.81426e-210	3.50715e-209	470.335	NCOA1
ENSG00000139626	-0.123671	6.1354	-33.0067	4.81268e-210	5.99243e-209	469.821	ITGB7
ENSG00000137760	-0.109062	3.88335	-32.9983	5.97437e-210	7.43249e-209	469.688	ALKBH8
ENSG00000159399	0.1446	5.96595	32.9945	6.58001e-210	8.1789e-209	469.462	HK2
ENSG00000087995	-0.102561	3.35517	-32.987	7.97249e-210	9.90124e-209	469.406	METTL2A
ENSG00000140743	-0.120712	4.47562	-32.9857	8.25468e-210	1.02429e-208	469.348	CDR2
ENSG00000198270	-0.11965	3.9141	-32.9761	1.05517e-209	1.30819e-208	469.121	TMEM116
ENSG00000147231	-0.179358	2.52184	-32.976	1.05797e-209	1.31054e-208	469.05	CXorf57
ENSG00000130787	-0.166405	4.44703	-32.9599	1.59791e-209	1.97768e-208	468.698	HIP1R
ENSG00000012048	0.100705	4.02496	32.9587	1.64548e-209	2.03482e-208	468.584	BRCA1
ENSG00000258476	0.248797	3.3924	32.9557	1.777e-209	2.19558e-208	468.523
ENSG00000241839	0.131256	6.35125	32.9546	1.83057e-209	2.25984e-208	468.443	PLEKHO2
ENSG00000150457	0.100383	4.08562	32.9536	1.87585e-209	2.31376e-208	468.451	LATS2
ENSG00000181191	-0.119031	3.50067	-32.9507	2.02206e-209	2.49198e-208	468.478	PJA1
ENSG00000103194	0.0990811	6.32771	32.9506	2.02379e-209	2.49198e-208	468.336	USP10
ENSG00000131873	0.131619	6.16229	32.9503	2.04196e-209	2.51221e-208	468.331	CHSY1
ENSG00000131759	0.153931	5.16192	32.9491	2.10279e-209	2.58486e-208	468.312	RARA
ENSG00000198707	-0.128428	4.9558	-32.9441	2.3892e-209	2.93444e-208	468.265	CEP290
ENSG00000133818	-0.189134	3.45528	-32.9061	6.31687e-209	7.75184e-208	467.338	RRAS2
ENSG00000172071	-0.09272	5.03551	-32.8892	9.73226e-209	1.1933e-207	466.847	EIF2AK3
ENSG00000164828	-0.0779012	5.22449	-32.8824	1.15879e-208	1.41961e-207	466.658	SUN1
ENSG00000136891	-0.0807035	4.42663	-32.873	1.47478e-208	1.8052e-207	466.458	TEX10
ENSG00000168495	-0.101034	3.44446	-32.8699	1.59496e-208	1.95065e-207	466.416	POLR3D
ENSG00000132623	-0.16764	2.44854	-32.8685	1.65577e-208	2.02331e-207	466.3	ANKEF1
ENSG00000058056	-0.141386	3.15985	-32.8641	1.84965e-208	2.25832e-207	466.261	USP13
ENSG00000176853	0.0697603	6.72228	32.8538	2.40676e-208	2.93605e-207	465.865	FAM91A1
ENSG00000084234	0.11179	7.59855	32.8448	3.02763e-208	3.69034e-207	465.659	APLP2
ENSG00000198932	-0.159164	4.91354	-32.8371	3.69118e-208	4.49535e-207	465.544	GPRASP1
ENSG00000115085	-0.146365	6.41709	-32.8351	3.88594e-208	4.72855e-207	465.44	ZAP70
ENSG00000156239	-0.124803	3.7566	-32.8344	3.95379e-208	4.80706e-207	465.508	N6AMT1
ENSG00000115827	-0.0877897	4.48959	-32.8337	4.02303e-208	4.88714e-207	465.454	DCAF17
ENSG00000261716	0.101892	5.47203	32.804	8.59991e-208	1.04383e-206	464.591
ENSG00000171488	-0.0849811	6.42867	-32.8007	9.33985e-208	1.13269e-206	464.537	LRRC8C
ENSG00000113303	0.204887	4.31382	32.7944	1.09625e-207	1.32836e-206	464.376	BTNL8
ENSG00000092470	-0.124555	3.27068	-32.7888	1.26767e-207	1.53479e-206	464.345	WDR76
ENSG00000147274	-0.0659473	7.12292	-32.7739	1.85028e-207	2.23829e-206	463.838	RBMX
ENSG00000119927	-0.108051	3.69836	-32.7677	2.16698e-207	2.61922e-206	463.809	GPAM
ENSG00000257878	0.170631	2.23049	32.7674	2.18672e-207	2.64087e-206	463.766
ENSG00000168228	-0.101114	3.30642	-32.7666	2.23165e-207	2.69288e-206	463.782	ZCCHC4
ENSG00000261609	-0.0711164	4.67493	-32.7514	3.29146e-207	3.96842e-206	463.34	GAN
ENSG00000134014	-0.0816909	4.81712	-32.7452	3.85543e-207	4.64451e-206	463.178	ELP3
ENSG00000258890	-0.0865984	4.67167	-32.7409	4.29922e-207	5.17481e-206	463.077	CEP95
ENSG00000076662	0.153706	8.37385	32.7376	4.68123e-207	5.62994e-206	462.949	ICAM3
ENSG00000177191	0.171289	3.45899	32.7362	4.84024e-207	5.81633e-206	462.933	B3GNT8
ENSG00000184220	-0.13481	2.36948	-32.7261	6.26256e-207	7.51924e-206	462.679	CMSS1
ENSG00000165819	-0.0654192	5.30098	-32.7236	6.67788e-207	8.01124e-206	462.599	METTL3
ENSG00000151465	0.08232	5.46911	32.7095	9.57331e-207	1.14753e-205	462.184	CDC123
ENSG00000204592	0.1026	11.1053	32.7037	1.10997e-206	1.32938e-205	462.143	HLA-E
ENSG00000135597	-0.0636853	5.39027	-32.7011	1.18576e-206	1.41899e-205	462.021	REPS1
ENSG00000073910	0.130156	7.90304	32.7005	1.2036e-206	1.43914e-205	461.991	FRY
ENSG00000168010	0.157364	7.6256	32.6982	1.27552e-206	1.52388e-205	461.932	ATG16L2
ENSG00000006695	-0.0937871	3.33501	-32.6967	1.32683e-206	1.58387e-205	462.003	COX10
ENSG00000163602	0.108385	6.50049	32.6926	1.4741e-206	1.75822e-205	461.758	RYBP
ENSG00000187257	0.0681144	6.37389	32.688	1.65341e-206	1.97046e-205	461.636	RSBN1L
ENSG00000102054	-0.0745698	5.4747	-32.6632	3.11552e-206	3.70988e-205	461.056	RBBP7
ENSG00000197818	0.116421	4.69421	32.6622	3.19627e-206	3.80291e-205	460.994	SLC9A8
ENSG00000164241	-0.153527	3.17542	-32.6616	3.24415e-206	3.8567e-205	461.103	C5orf63
ENSG00000086712	-0.0860987	4.33971	-32.6534	3.99876e-206	4.74988e-205	460.872	TXLNG
ENSG00000119900	0.130439	8.73513	32.6505	4.30261e-206	5.10661e-205	460.739	OGFRL1
ENSG00000152582	-0.169027	3.23647	-32.644	5.07161e-206	6.01437e-205	460.66	SPEF2
ENSG00000269837	-0.139345	3.09146	-32.6426	5.26808e-206	6.24225e-205	460.618	IPO5P1
ENSG00000181827	-0.0903753	5.06741	-32.6396	5.67501e-206	6.71892e-205	460.483	RFX7
ENSG00000088298	0.0762749	5.02892	32.6357	6.27647e-206	7.42493e-205	460.315	EDEM2
ENSG00000110713	0.0904849	7.88155	32.615	1.06099e-205	1.2541e-204	459.808	NUP98
ENSG00000273559	0.0638982	4.95146	32.6002	1.54824e-205	1.82854e-204	459.416	CWC25
ENSG00000213246	0.089423	5.43678	32.5942	1.80486e-205	2.12988e-204	459.251	SUPT4H1
ENSG00000168575	-0.0761961	3.89428	-32.5891	2.05316e-205	2.42092e-204	459.254	SLC20A2
ENSG00000230606	-0.159106	4.70173	-32.5885	2.08384e-205	2.45509e-204	459.224
ENSG00000213462	0.157598	6.31112	32.5845	2.30914e-205	2.71831e-204	459.014	ERV3-1
ENSG00000169084	0.106198	3.97512	32.5839	2.34418e-205	2.75732e-204	459.032	DHRSX
ENSG00000255717	-0.108473	5.34872	-32.5805	2.55255e-205	2.99997e-204	458.974	SNHG1
ENSG00000005020	0.149349	6.03307	32.5654	3.74964e-205	4.40332e-204	458.528	SKAP2
ENSG00000113580	0.0640235	8.02908	32.5548	4.90605e-205	5.75664e-204	458.277	NR3C1
ENSG00000010539	0.080981	5.04034	32.5523	5.24028e-205	6.14384e-204	458.193	ZNF200
ENSG00000030066	-0.061497	5.74725	-32.5327	8.61151e-205	1.00882e-203	457.726	NUP160
ENSG00000148606	-0.0689848	4.45519	-32.5269	9.99096e-205	1.16947e-203	457.643	POLR3A
ENSG00000166130	0.145171	4.89586	32.5226	1.11252e-204	1.30118e-203	457.446	IKBIP
ENSG00000144580	-0.0525684	5.11342	-32.5148	1.35592e-204	1.58457e-203	457.296	CNOT9
ENSG00000120798	-0.104206	4.03699	-32.4943	2.2858e-204	2.66911e-203	456.848	NR2C1
ENSG00000172340	-0.0844325	5.14417	-32.4864	2.79384e-204	3.2597e-203	456.587	SUCLG2
ENSG00000197969	-0.0922886	6.91271	-32.4767	3.56864e-204	4.16035e-203	456.292	VPS13A
ENSG00000167676	0.197324	2.84105	32.4741	3.81107e-204	4.43938e-203	456.288	PLIN4
ENSG00000196177	-0.0901864	4.11159	-32.469	4.34825e-204	5.06105e-203	456.199	ACADSB
ENSG00000240303	-0.118528	4.12527	-32.4646	4.85704e-204	5.6487e-203	456.095	ACAD11
ENSG00000197324	0.166013	6.26813	32.4582	5.70854e-204	6.63365e-203	455.812	LRP10
ENSG00000233369	0.146831	7.35996	32.4464	7.70341e-204	8.94462e-203	455.528	GTF2IP4
ENSG00000050405	-0.147244	3.45284	-32.4459	7.81331e-204	9.06494e-203	455.637	LIMA1
ENSG00000149177	0.143936	8.46233	32.4386	9.4016e-204	1.08989e-202	455.355	PTPRJ
ENSG00000164134	-0.0941639	5.69723	-32.4351	1.02644e-203	1.18896e-202	455.267	NAA15
ENSG00000067900	0.0727992	7.59659	32.43	1.16962e-203	1.35373e-202	455.103	ROCK1
ENSG00000159131	-0.0648764	5.1021	-32.4227	1.40543e-203	1.62535e-202	454.967	GART
ENSG00000123505	0.0780945	7.46241	32.414	1.75142e-203	2.02386e-202	454.697	AMD1
ENSG00000111837	0.198148	3.79558	32.4103	1.92822e-203	2.22639e-202	454.628	MAK
ENSG00000119760	-0.074039	5.2294	-32.4082	2.03322e-203	2.34575e-202	454.595	SUPT7L
ENSG00000156313	0.108692	4.61404	32.3962	2.75426e-203	3.17509e-202	454.246	RPGR
ENSG00000070731	0.17537	3.92089	32.3961	2.75879e-203	3.17777e-202	454.265	ST6GALNAC2
ENSG00000178904	0.0954134	4.94796	32.3945	2.8723e-203	3.30589e-202	454.197	DPY19L3
ENSG00000276136	0.103779	3.14583	32.3815	3.9993e-203	4.59935e-202	453.948
ENSG00000130816	-0.0853267	5.72186	-32.3759	4.61213e-203	5.29991e-202	453.762	DNMT1
ENSG00000286488	0.119058	4.31821	32.374	4.83785e-203	5.55488e-202	453.692	NA
ENSG00000148925	0.0783855	5.30353	32.3678	5.65922e-203	6.49284e-202	453.512	BTBD10
ENSG00000197081	0.182611	9.67388	32.3658	5.95439e-203	6.82606e-202	453.548	IGF2R
ENSG00000183323	0.115097	5.04809	32.3483	9.2766e-203	1.06262e-201	453.022	CCDC125
ENSG00000157107	0.131344	5.62813	32.3467	9.65353e-203	1.10492e-201	452.98	FCHO2
ENSG00000076248	-0.132773	2.99364	-32.3464	9.72776e-203	1.11254e-201	453.109	UNG
ENSG00000182307	-0.0784534	3.98067	-32.3407	1.1246e-202	1.28516e-201	452.956	C8orf33
ENSG00000247708	-0.155178	3.61576	-32.3386	1.18476e-202	1.35283e-201	452.923	STX18-AS1
ENSG00000105851	0.0736971	7.4285	32.334	1.33077e-202	1.51836e-201	452.67	PIK3CG
ENSG00000131042	0.14502	5.70685	32.3335	1.35013e-202	1.53923e-201	452.647	LILRB2
ENSG00000151466	0.10083	6.34464	32.3203	1.88508e-202	2.14742e-201	452.309	SCLT1
ENSG00000237803	0.205337	3.57072	32.3178	2.0067e-202	2.28417e-201	452.296	LINC00211
ENSG00000085998	-0.102255	3.66528	-32.3176	2.01684e-202	2.2939e-201	452.388	POMGNT1
ENSG00000236438	0.222254	4.92039	32.3089	2.51338e-202	2.8564e-201	452.042	FAM157A
ENSG00000104343	0.106088	6.19166	32.3049	2.78362e-202	3.16103e-201	451.922	UBE2W
ENSG00000197321	0.147556	6.55664	32.2928	3.77535e-202	4.28386e-201	451.626	SVIL
ENSG00000162511	0.0948176	8.54395	32.2909	3.96313e-202	4.49341e-201	451.61	LAPTM5
ENSG00000139641	-0.0972456	6.84204	-32.2908	3.97691e-202	4.50551e-201	451.588	ESYT1
ENSG00000134243	0.141447	5.68557	32.287	4.38092e-202	4.95932e-201	451.469	SORT1
ENSG00000125538	0.161761	5.32264	32.2869	4.38668e-202	4.96196e-201	451.471	IL1B
ENSG00000131368	-0.0869204	5.0632	-32.2866	4.42021e-202	4.99598e-201	451.535	MRPS25
ENSG00000158156	0.1229	4.6718	32.2865	4.42818e-202	5.00108e-201	451.47	XKR8
ENSG00000005469	-0.122191	3.27264	-32.2811	5.08302e-202	5.73615e-201	451.469	CROT
ENSG00000116903	0.0676036	6.20326	32.2716	6.46823e-202	7.29366e-201	451.072	EXOC8
ENSG00000115165	0.0607599	7.96416	32.2528	1.0403e-201	1.17214e-200	450.625	CYTIP
ENSG00000074695	-0.0997658	5.54638	-32.2525	1.04629e-201	1.17797e-200	450.658	LMAN1
ENSG00000189091	-0.0673682	6.81805	-32.248	1.17301e-201	1.31962e-200	450.496	SF3B3
ENSG00000226950	-0.12	4.21784	-32.2383	1.49851e-201	1.68448e-200	450.371	DANCR
ENSG00000185201	0.210091	8.68634	32.222	2.262e-201	2.54075e-200	449.897	IFITM2
ENSG00000170909	0.133048	3.57598	32.2102	3.05147e-201	3.42485e-200	449.586	OSCAR
ENSG00000226479	0.0825867	5.09934	32.2062	3.37241e-201	3.78212e-200	449.433	TMEM185B
ENSG00000188786	0.0983434	5.3348	32.2045	3.52659e-201	3.95197e-200	449.383	MTF1
ENSG00000155158	-0.110722	5.48694	-32.2031	3.65241e-201	4.0898e-200	449.416	TTC39B
ENSG00000274963	0.125786	2.37742	32.1995	3.99399e-201	4.46881e-200	449.378	RN7SL600P
ENSG00000105656	0.123541	5.02625	32.1991	4.03795e-201	4.51451e-200	449.261	ELL
ENSG00000107164	-0.0560282	4.77128	-32.1962	4.35143e-201	4.86122e-200	449.253	FUBP3
ENSG00000173614	0.0839487	3.78615	32.1933	4.6824e-201	5.22693e-200	449.161	NMNAT1
ENSG00000119812	-0.0891753	3.62399	-32.1854	5.71153e-201	6.37082e-200	449.049	FAM98A
ENSG00000071189	0.0782148	6.97483	32.1833	6.01741e-201	6.70683e-200	448.856	SNX13
ENSG00000108021	-0.0590018	6.79625	-32.177	7.06573e-201	7.86919e-200	448.701	FAM208B
ENSG00000183475	0.0539178	5.10706	32.1716	8.08633e-201	8.99892e-200	448.565	ASB7
ENSG00000117616	0.0809808	7.90639	32.1697	8.49123e-201	9.44225e-200	448.531	RSRP1
ENSG00000198860	-0.104428	4.52215	-32.1656	9.42248e-201	1.04697e-199	448.514	TSEN15
ENSG00000133131	-0.125607	2.93195	-32.1642	9.74781e-201	1.08229e-199	448.511	MORC4
ENSG00000160856	-0.222579	5.40003	-32.1619	1.03493e-200	1.1482e-199	448.411	FCRL3
ENSG00000139173	-0.173949	1.44927	-32.1575	1.15369e-200	1.27897e-199	448.085	TMEM117
ENSG00000198060	0.0742585	4.2667	32.1563	1.19108e-200	1.31941e-199	448.208	2025-03-05
ENSG00000284691	-0.163436	2.51028	-32.1546	1.24346e-200	1.37638e-199	448.223	NA
ENSG00000064932	0.174006	6.08302	32.154	1.26296e-200	1.39689e-199	448.131	SBNO2
ENSG00000088876	-0.0904087	3.27837	-32.1482	1.46219e-200	1.61601e-199	448.117	ZNF343
ENSG00000261371	0.115529	8.39588	32.1427	1.67675e-200	1.85172e-199	447.87	PECAM1
ENSG00000082068	-0.0690752	4.87586	-32.1335	2.11951e-200	2.33891e-199	447.671	WDR70
ENSG00000143486	-0.0764317	4.74951	-32.1148	3.39408e-200	3.74255e-199	447.212	EIF2D
ENSG00000136717	-0.133172	5.13718	-32.1144	3.4272e-200	3.77618e-199	447.208	BIN1
ENSG00000281005	0.102147	3.56093	32.113	3.54899e-200	3.9074e-199	447.146	LINC00921
ENSG00000161638	0.118127	6.87857	32.0863	6.96413e-200	7.6616e-199	446.415	ITGA5
ENSG00000158079	-0.128744	2.81774	-32.0804	8.0844e-200	8.88731e-199	446.394	PTPDC1
ENSG00000128915	-0.0833828	5.68295	-32.0741	9.47966e-200	1.04132e-198	446.145	ICE2
ENSG00000171843	-0.123064	4.89574	-32.0712	1.01918e-199	1.11869e-198	446.126	MLLT3
ENSG00000154511	-0.143468	3.31421	-32.0671	1.13069e-199	1.24015e-198	446.075	FAM69A
ENSG00000128739	-0.0959378	5.12143	-32.0575	1.4377e-199	1.5757e-198	445.76	SNRPN
ENSG00000108100	0.0718453	6.67878	32.0467	1.89097e-199	2.0709e-198	445.406	CCNY
ENSG00000144635	0.0940253	5.80883	32.0255	3.22102e-199	3.52484e-198	444.872	DYNC1LI1
ENSG00000112561	0.111743	4.73203	32.0239	3.3546e-199	3.66824e-198	444.853	TFEB
ENSG00000133943	0.108188	6.85144	32.0197	3.72823e-199	4.07372e-198	444.736	C14orf159
ENSG00000081237	0.0793793	11.1354	32.0163	4.06034e-199	4.43326e-198	444.75	PTPRC
ENSG00000127663	0.133356	6.20144	32.0065	5.19815e-199	5.67128e-198	444.403	KDM4B
ENSG00000071537	0.0852953	7.15194	31.999	6.2767e-199	6.84283e-198	444.218	SEL1L
ENSG00000020426	-0.11676	3.01419	-31.9963	6.72414e-199	7.3251e-198	444.292	MNAT1
ENSG00000284882	0.137248	1.69598	31.9954	6.88454e-199	7.49419e-198	444.257	NA
ENSG00000122359	0.0949326	7.42182	31.989	8.07897e-199	8.78778e-198	443.973	ANXA11
ENSG00000115091	0.0682659	8.85505	31.9725	1.22492e-198	1.33139e-197	443.587	ACTR3
ENSG00000142207	-0.107934	4.30154	-31.9551	1.89484e-198	2.05798e-197	443.233	URB1
ENSG00000151651	0.148435	7.078	31.9544	1.93177e-198	2.09652e-197	443.109	ADAM8
ENSG00000153250	0.0644381	6.88586	31.9523	2.03359e-198	2.20537e-197	443.036	RBMS1
ENSG00000123609	0.113331	5.64104	31.9511	2.09499e-198	2.27026e-197	443.004	NMI
ENSG00000150768	-0.0855314	3.71704	-31.9488	2.21971e-198	2.40361e-197	443.094	DLAT
ENSG00000255398	0.189078	5.79742	31.9371	2.97922e-198	3.22363e-197	442.662	HCAR3
ENSG00000083544	-0.0959331	4.22118	-31.9366	3.02021e-198	3.26553e-197	442.765	TDRD3
ENSG00000112406	0.0595146	7.69375	31.9341	3.2126e-198	3.47096e-197	442.593	HECA
ENSG00000130023	-0.0894878	3.77896	-31.9244	4.09917e-198	4.42551e-197	442.479	ERMARD
ENSG00000134215	0.0760594	6.09024	31.9174	4.89923e-198	5.28532e-197	442.151	VAV3
ENSG00000178996	0.0931928	7.07851	31.9168	4.97263e-198	5.3605e-197	442.15	SNX18
ENSG00000120942	-0.0944574	3.89382	-31.8963	8.32225e-198	8.96471e-197	441.771	UBIAD1
ENSG00000224152	0.148452	2.51529	31.8912	9.45806e-198	1.01806e-196	441.603
ENSG00000153207	0.100227	7.84435	31.8911	9.48196e-198	1.01987e-196	441.524	AHCTF1
ENSG00000114735	-0.10475	4.83333	-31.8898	9.8051e-198	1.05385e-196	441.561	HEMK1
ENSG00000100580	0.0857951	5.7967	31.8857	1.08644e-197	1.16683e-196	441.357	TMED8
ENSG00000164327	0.0971535	8.35022	31.8844	1.12289e-197	1.20509e-196	441.367	RICTOR
ENSG00000171777	0.170357	4.45118	31.8833	1.15208e-197	1.23549e-196	441.326	RASGRP4
ENSG00000109917	-0.0727204	4.79802	-31.8826	1.17413e-197	1.25821e-196	441.37	ZPR1
ENSG00000286030	-0.163978	3.83393	-31.8812	1.21407e-197	1.30004e-196	441.405	NA
ENSG00000104228	-0.0806103	4.80085	-31.8785	1.30094e-197	1.39204e-196	441.272	TRIM35
ENSG00000168672	-0.150464	3.78462	-31.8767	1.36119e-197	1.45543e-196	441.292	FAM84B
ENSG00000135404	0.103318	6.33417	31.8753	1.41127e-197	1.50785e-196	441.1	CD63
ENSG00000087263	-0.0780571	3.69804	-31.8724	1.51575e-197	1.61829e-196	441.175	OGFOD1
ENSG00000112249	-0.0812947	6.79648	-31.8588	2.13123e-197	2.27373e-196	440.706	ASCC3
ENSG00000067560	0.0814179	8.61789	31.846	2.94516e-197	3.13977e-196	440.408	RHOA
ENSG00000144736	-0.0852261	3.87221	-31.8365	3.73962e-197	3.98379e-196	440.268	SHQ1
ENSG00000146112	0.106639	6.34679	31.8295	4.45487e-197	4.74224e-196	439.952	PPP1R18
ENSG00000165138	-0.14833	2.32839	-31.829	4.51378e-197	4.80142e-196	440.027	ANKS6
ENSG00000155016	-0.121513	3.24891	-31.8082	7.60176e-197	8.08022e-196	439.577	CYP2U1
ENSG00000213463	-0.091461	4.90431	-31.8066	7.91439e-197	8.40635e-196	439.467	SYNJ2BP
ENSG00000166888	0.0960546	7.91057	31.7995	9.44851e-197	1.00285e-195	439.228	STAT6
ENSG00000096060	0.169891	6.35638	31.7895	1.21379e-196	1.28735e-195	438.963	FKBP5
ENSG00000151882	-0.148059	2.14097	-31.779	1.57954e-196	1.67403e-195	438.752	CCL28
ENSG00000088543	-0.150101	2.65873	-31.7702	1.9695e-196	2.08579e-195	438.596	C3orf18
ENSG00000158517	0.169713	7.50306	31.7686	2.05326e-196	2.17291e-195	438.459	NCF1
ENSG00000015133	-0.0955987	6.72152	-31.7567	2.76424e-196	2.92318e-195	438.154	CCDC88C
ENSG00000125779	0.0540342	6.03567	31.7544	2.93211e-196	3.09843e-195	438.062	PANK2
ENSG00000101846	0.103538	3.50035	31.7524	3.08047e-196	3.25283e-195	438.093	STS
ENSG00000105483	0.0886684	7.51333	31.7492	3.33827e-196	3.52248e-195	437.957	CARD8
ENSG00000123124	-0.0847021	5.58429	-31.739	4.31137e-196	4.54597e-195	437.737	WWP1
ENSG00000135473	-0.0841532	5.00883	-31.7316	5.18722e-196	5.46548e-195	437.58	PAN2
ENSG00000137078	-0.153976	4.43177	-31.7041	1.03258e-195	1.08718e-194	436.949	SIT1
ENSG00000131069	0.0889999	4.24825	31.6945	1.31201e-195	1.38038e-194	436.608	ACSS2
ENSG00000121957	0.116129	3.64734	31.6887	1.5183e-195	1.59626e-194	436.484	GPSM2
ENSG00000189362	-0.124355	4.00683	-31.6878	1.55181e-195	1.6303e-194	436.552	NEMP2
ENSG00000151353	-0.0786704	4.00239	-31.6793	1.91934e-195	2.01496e-194	436.328	TMEM18
ENSG00000168092	0.055496	5.92994	31.6718	2.31836e-195	2.43209e-194	435.998	PAFAH1B2
ENSG00000282988	0.17379	3.55341	31.6716	2.33042e-195	2.44297e-194	436.053	NA
ENSG00000163964	0.105515	4.84085	31.6624	2.93698e-195	3.07659e-194	435.778	PIGX
ENSG00000175489	0.144864	6.12883	31.6561	3.43681e-195	3.59758e-194	435.619	LRRC25
ENSG00000154309	-0.111212	3.15574	-31.6547	3.55745e-195	3.72117e-194	435.739	DISP1
ENSG00000141968	0.090249	7.11617	31.6499	4.01002e-195	4.19152e-194	435.467	VAV1
ENSG00000049883	-0.106381	3.56139	-31.646	4.41631e-195	4.61287e-194	435.52	PTCD2
ENSG00000196950	-0.106735	5.50268	-31.6441	4.63612e-195	4.83897e-194	435.379	SLC39A10
ENSG00000186073	-0.134634	2.19587	-31.642	4.88827e-195	5.09847e-194	435.35	C15orf41
ENSG00000164483	-0.167118	5.47798	-31.6389	5.2772e-195	5.50016e-194	435.267	SAMD3
ENSG00000266094	0.0656779	7.89744	31.6387	5.3083e-195	5.52859e-194	435.198	RASSF5
ENSG00000111348	0.0882044	8.99187	31.637	5.53808e-195	5.76375e-194	435.189	ARHGDIB
ENSG00000158825	0.172105	2.96406	31.6322	6.24193e-195	6.49161e-194	435.093	CDA
ENSG00000247828	-0.092564	6.39779	-31.6309	6.44924e-195	6.70238e-194	435.014	TMEM161B-AS1
ENSG00000151883	0.074717	8.49321	31.6103	1.08068e-194	1.12229e-193	434.506	PARP8
ENSG00000179240	-0.122018	3.66275	-31.6076	1.15467e-194	1.19827e-193	434.56
ENSG00000170946	-0.109907	4.00718	-31.5952	1.57329e-194	1.63153e-193	434.236	DNAJC24
ENSG00000180539	0.122273	3.26665	31.5938	1.63109e-194	1.69025e-193	434.135	C9orf139
ENSG00000255987	-0.15994	2.85246	-31.5895	1.81651e-194	1.88105e-193	434.096	TOMM20P2
ENSG00000067533	-0.115669	3.52835	-31.5852	2.02276e-194	2.09313e-193	434.002	RRP15
ENSG00000082014	0.120985	3.34402	31.5808	2.2554e-194	2.33219e-193	433.806	SMARCD3
ENSG00000103018	-0.0601036	5.39877	-31.5754	2.58545e-194	2.67156e-193	433.646	CYB5B
ENSG00000188554	0.0772929	7.72085	31.5615	3.65432e-194	3.77334e-193	433.27	NBR1
ENSG00000104915	0.109617	5.28924	31.5504	4.81864e-194	4.97204e-193	432.981	STX10
ENSG00000136104	-0.0831719	6.61442	-31.5353	7.02804e-194	7.2466e-193	432.619	RNASEH2B
ENSG00000121310	-0.145606	4.00126	-31.5251	9.06362e-194	9.33883e-193	432.495	ECHDC2
ENSG00000240445	-0.136018	2.67922	-31.5225	9.67414e-194	9.96078e-193	432.42	FOXO3B
ENSG00000223496	-0.0963748	4.58384	-31.5179	1.08471e-193	1.11605e-192	432.273	EXOSC6
ENSG00000124608	-0.0980928	3.81753	-31.5132	1.22007e-193	1.25443e-192	432.197	AARS2
ENSG00000137207	0.106654	4.72994	31.509	1.35406e-193	1.39121e-192	431.959	YIPF3
ENSG00000140678	0.184295	7.42439	31.5081	1.38697e-193	1.42401e-192	431.953	ITGAX
ENSG00000132694	0.130692	4.96229	31.5022	1.60452e-193	1.6462e-192	431.779	ARHGEF11
ENSG00000118971	-0.0991148	6.71222	-31.5007	1.66937e-193	1.71152e-192	431.759	CCND2
ENSG00000093167	0.0700537	5.65485	31.4964	1.85849e-193	1.90406e-192	431.621	LRRFIP2
ENSG00000002834	0.0964059	7.28085	31.4892	2.21976e-193	2.27258e-192	431.462	LASP1
ENSG00000075914	-0.0855075	3.5962	-31.488	2.28788e-193	2.34067e-192	431.576	EXOSC7
ENSG00000066651	-0.126199	3.50546	-31.4875	2.31957e-193	2.37141e-192	431.568	TRMT11
ENSG00000253719	-0.0524668	6.21469	-31.484	2.52913e-193	2.58382e-192	431.335	ATXN7L3B
ENSG00000101290	0.0832876	7.31378	31.472	3.41401e-193	3.48538e-192	431.03	CDS2
ENSG00000070718	-0.110866	4.63426	-31.4717	3.44067e-193	3.51011e-192	431.124	AP3M2
ENSG00000105520	0.147317	3.16799	31.4686	3.71189e-193	3.78414e-192	431.012	PLPPR2
ENSG00000198216	0.199757	2.77865	31.4588	4.74279e-193	4.8317e-192	430.779	CACNA1E
ENSG00000148411	0.107787	5.52827	31.4564	5.03198e-193	5.12269e-192	430.631	NACC2
ENSG00000160883	0.152795	6.7768	31.4518	5.64262e-193	5.7403e-192	430.536	HK3
ENSG00000147044	-0.0908681	5.12248	-31.4243	1.11958e-192	1.13816e-191	429.91	CASK
ENSG00000152795	-0.0676846	6.94298	-31.4214	1.20403e-192	1.22315e-191	429.773	HNRNPDL
ENSG00000101109	0.0628094	9.17039	31.4138	1.45657e-192	1.47867e-191	429.623	STK4
ENSG00000076321	-0.0659796	4.45777	-31.4134	1.46891e-192	1.49014e-191	429.667	KLHL20
ENSG00000106443	-0.0897553	5.59786	-31.4062	1.75741e-192	1.78157e-191	429.438	PHF14
ENSG00000101546	-0.111628	2.77973	-31.4036	1.87456e-192	1.899e-191	429.473	RBFA
ENSG00000085721	-0.0884239	5.23735	-31.3935	2.41135e-192	2.44107e-191	429.137	RRN3
ENSG00000079616	-0.10072	4.52994	-31.3848	2.99574e-192	3.03054e-191	428.966	KIF22
ENSG00000089154	-0.0852263	5.98033	-31.3835	3.09446e-192	3.12821e-191	428.858	GCN1
ENSG00000143458	-0.0751052	4.73733	-31.3834	3.09901e-192	3.13063e-191	428.906	GABPB2
ENSG00000029639	-0.0889117	3.60968	-31.3812	3.27598e-192	3.30709e-191	428.918	TFB1M
ENSG00000198315	-0.0852696	5.52981	-31.3789	3.47022e-192	3.50073e-191	428.757	ZKSCAN8
ENSG00000155097	0.0807401	5.60188	31.377	3.63962e-192	3.66907e-191	428.652	ATP6V1C1
ENSG00000251369	-0.121158	4.08979	-31.3715	4.17263e-192	4.20346e-191	428.665	ZNF550
ENSG00000196923	0.163361	3.5958	31.3573	5.94643e-192	5.98618e-191	428.226	PDLIM7
ENSG00000168758	-0.141549	3.64151	-31.3467	7.73575e-192	7.78205e-191	428.067	SEMA4C
ENSG00000120051	0.146313	1.71389	31.3449	8.08334e-192	8.12606e-191	428.004	CFAP58
ENSG00000172765	0.116446	5.93681	31.337	9.83573e-192	9.88084e-191	427.659	TMCC1
ENSG00000125347	0.106596	9.03871	31.3214	1.45159e-191	1.45723e-190	427.333	IRF1
ENSG00000065183	-0.0871457	4.80231	-31.3206	1.48109e-191	1.48582e-190	427.348	WDR3
ENSG00000163754	0.0943602	4.59569	31.3197	1.51436e-191	1.51814e-190	427.249	GYG1
ENSG00000139737	-0.109321	4.07634	-31.3151	1.69892e-191	1.70199e-190	427.259	SLAIN1
ENSG00000189144	-0.123341	2.97007	-31.3124	1.81287e-191	1.81488e-190	427.216	ZNF573
ENSG00000111530	-0.0725676	6.70881	-31.3077	2.0419e-191	2.04274e-190	426.949	CAND1
ENSG00000182487	0.162094	6.16055	31.301	2.41133e-191	2.41066e-190	426.775	NCF1B
ENSG00000107372	0.0721356	7.37428	31.3005	2.43814e-191	2.43578e-190	426.767	ZFAND5
ENSG00000147224	-0.0862188	4.52874	-31.2925	2.97854e-191	2.9736e-190	426.666	PRPS1
ENSG00000241399	0.126251	6.68739	31.2919	3.01838e-191	3.01129e-190	426.552	CD302
ENSG00000113319	-0.158319	4.86842	-31.2878	3.344e-191	3.33386e-190	426.561	RASGRF2
ENSG00000173011	0.0617991	5.79566	31.2742	4.68727e-191	4.66983e-190	426.097	TADA2B
ENSG00000197971	0.102856	8.18722	31.2702	5.18551e-191	5.16266e-190	426.039	MBP
ENSG00000121858	0.14295	7.574	31.2699	5.22263e-191	5.19604e-190	426.026	TNFSF10
ENSG00000122484	-0.0974764	5.31767	-31.2687	5.37269e-191	5.34165e-190	426.037	RPAP2
ENSG00000125246	-0.143629	2.22236	-31.2637	6.09071e-191	6.05137e-190	425.942	CLYBL
ENSG00000182173	-0.14298	3.79314	-31.2623	6.29788e-191	6.25289e-190	425.969	TSEN54
ENSG00000162551	0.272292	5.42887	31.2303	1.39471e-190	1.3838e-189	425.038	ALPL
ENSG00000188921	0.0804982	6.79662	31.2199	1.8058e-190	1.79044e-189	424.758	HACD4
ENSG00000159720	0.124011	6.82557	31.214	2.09309e-190	2.07386e-189	424.619	ATP6V0D1
ENSG00000072110	0.168027	7.15219	31.1898	3.81202e-190	3.77442e-189	424.034	ACTN1
ENSG00000183762	0.253722	4.39605	31.1892	3.86901e-190	3.82823e-189	424.027	KREMEN1
ENSG00000175197	0.106415	3.43762	31.1891	3.87839e-190	3.83488e-189	424.066	DDIT3
ENSG00000119318	0.0773204	6.66877	31.175	5.49919e-190	5.43378e-189	423.643	RAD23B
ENSG00000155957	0.0823032	6.23269	31.1674	6.64467e-190	6.56116e-189	423.451	TMBIM4
ENSG00000135677	0.110043	7.78226	31.1619	7.61141e-190	7.51062e-189	423.348	GNS
ENSG00000101160	0.0866891	7.50903	31.16	7.98201e-190	7.87093e-189	423.289	CTSZ
ENSG00000204386	0.0867401	4.83578	31.1594	8.11013e-190	7.99182e-189	423.267	NEU1
ENSG00000113732	0.0855295	6.71442	31.1472	1.09708e-189	1.08034e-188	422.956	ATP6V0E1
ENSG00000054967	0.117615	6.34165	31.1469	1.10495e-189	1.08735e-188	422.951	RELT
ENSG00000080839	-0.0987939	4.72007	-31.1446	1.17067e-189	1.15124e-188	422.993	RBL1
ENSG00000173611	-0.112049	4.08111	-31.1419	1.2512e-189	1.22959e-188	422.967	SCAI
ENSG00000165060	-0.101634	3.13601	-31.1409	1.28129e-189	1.25831e-188	422.971	FXN
ENSG00000184613	-0.199727	5.8628	-31.1344	1.50613e-189	1.47811e-188	422.728	NELL2
ENSG00000113838	-0.0756135	3.61368	-31.129	1.72003e-189	1.68689e-188	422.663	TBCCD1
ENSG00000144445	0.0735173	4.67218	31.123	1.99504e-189	1.95527e-188	422.378	KANSL1L
ENSG00000173200	-0.148537	5.52858	-31.1139	2.50143e-189	2.44991e-188	422.208	PARP15
ENSG00000119048	0.122511	5.90781	31.1059	3.05116e-189	2.9863e-188	421.934	UBE2B
ENSG00000160818	-0.117698	3.39858	-31.0981	3.70227e-189	3.62111e-188	421.911	GPATCH4
ENSG00000131943	-0.0904718	4.12536	-31.0968	3.82584e-189	3.73944e-188	421.844	C19orf12
ENSG00000139890	0.13766	2.23902	31.0818	5.53988e-189	5.41112e-188	421.466	REM2
ENSG00000172349	0.0651967	8.92004	31.0461	1.33947e-188	1.30746e-187	420.502	IL16
ENSG00000152804	0.0922537	4.1876	31.0307	1.9623e-188	1.9141e-187	420.11	HHEX
ENSG00000280832	0.159873	2.78099	31.0183	2.66426e-188	2.59707e-187	419.865	ST3GAL4-AS1
ENSG00000115504	-0.0750711	4.28529	-30.9991	4.28792e-188	4.17696e-187	419.414	EHBP1
ENSG00000270426	0.0914627	3.55776	30.997	4.51621e-188	4.39639e-187	419.316
ENSG00000177105	0.131888	5.55437	30.995	4.74405e-188	4.61507e-187	419.196	RHOG
ENSG00000132912	0.0713169	5.77349	30.9938	4.89006e-188	4.75392e-187	419.156	DCTN4
ENSG00000182183	-0.155754	2.55039	-30.9767	7.45746e-188	7.24497e-187	418.883	FAM159A
ENSG00000185591	0.105636	7.73085	30.9724	8.28544e-188	8.04395e-187	418.661	SP1
ENSG00000100644	0.107849	7.366	30.9491	1.47536e-187	1.43139e-186	418.077	HIF1A
ENSG00000122642	0.143088	1.43514	30.9388	1.89858e-187	1.84077e-186	417.969	FKBP9
ENSG00000132436	-0.122708	3.57087	-30.9327	2.20708e-187	2.13845e-186	417.827	FIGNL1
ENSG00000175073	0.0716137	7.61139	30.9303	2.34545e-187	2.27099e-186	417.612	VCPIP1
ENSG00000156398	-0.152242	2.38677	-30.9302	2.34798e-187	2.27191e-186	417.721	SFXN2
ENSG00000145348	-0.0747883	5.46918	-30.9293	2.40324e-187	2.32382e-186	417.625	TBCK
ENSG00000114374	-0.104399	1.35793	-30.9201	3.01343e-187	2.91191e-186	417.462	USP9Y
ENSG00000110619	0.0571398	5.57901	30.9147	3.44893e-187	3.33051e-186	417.206	CARS
ENSG00000161010	-0.152897	3.38925	-30.9003	4.91024e-187	4.73848e-186	417.034	C5orf45
ENSG00000004487	-0.0682922	5.19759	-30.8996	4.99429e-187	4.81638e-186	416.905	KDM1A
ENSG00000104974	0.128314	5.16274	30.8968	5.35932e-187	5.16496e-186	416.773	LILRA1
ENSG00000163219	0.0882626	8.24701	30.8951	5.58136e-187	5.37536e-186	416.765	ARHGAP25
ENSG00000114491	-0.0911943	4.20256	-30.8942	5.71786e-187	5.50315e-186	416.842	UMPS
ENSG00000245571	-0.109174	2.45565	-30.89	6.33683e-187	6.09482e-186	416.757
ENSG00000186350	0.130769	7.13413	30.8825	7.61903e-187	7.32319e-186	416.438	RXRA
ENSG00000255310	-0.15557	2.79203	-30.8823	7.66715e-187	7.36454e-186	416.576
ENSG00000181481	0.091876	4.28145	30.8753	9.09901e-187	8.73408e-186	416.273	RNF135
ENSG00000116954	0.0697422	4.73378	30.8745	9.2872e-187	8.90881e-186	416.24	RRAGC
ENSG00000004660	0.127535	3.30458	30.8704	1.02712e-186	9.84616e-186	416.199	CAMKK1
ENSG00000255801	0.197029	1.8137	30.868	1.08922e-186	1.04346e-185	416.191
ENSG00000125846	-0.0816697	3.61814	-30.8566	1.4454e-186	1.38375e-185	415.943	ZNF133
ENSG00000078319	-0.102241	2.87585	-30.8358	2.41239e-186	2.30797e-185	415.444	PMS2P1
ENSG00000171791	-0.113018	7.37892	-30.8295	2.8145e-186	2.6909e-185	415.139	BCL2
ENSG00000198556	-0.106973	3.26775	-30.8105	4.49792e-186	4.29755e-185	414.824	ZNF789
ENSG00000118263	0.126464	5.97409	30.8098	4.56987e-186	4.36341e-185	414.629	KLF7
ENSG00000005801	-0.0878601	4.88939	-30.7977	6.16457e-186	5.88218e-185	414.422	ZNF195
ENSG00000147439	0.0761912	4.88458	30.7926	6.98762e-186	6.66313e-185	414.219	BIN3
ENSG00000277443	0.156518	5.70874	30.7905	7.36328e-186	7.01671e-185	414.16	MARCKS
ENSG00000144161	-0.101207	3.35938	-30.767	1.31033e-185	1.24783e-184	413.754	ZC3H8
ENSG00000124275	-0.0782933	4.70917	-30.7432	2.35385e-185	2.24011e-184	413.092	MTRR
ENSG00000148719	0.0793218	5.28358	30.7373	2.72014e-185	2.587e-184	412.85	DNAJB12
ENSG00000101236	0.210275	6.75798	30.7281	3.41183e-185	3.2427e-184	412.648	RNF24
ENSG00000272316	-0.13434	3.89409	-30.7176	4.42401e-185	4.20194e-184	412.526
ENSG00000135709	0.119022	6.64452	30.7145	4.77507e-185	4.5324e-184	412.292	KIAA0513
ENSG00000160613	-0.0823661	6.87843	-30.7106	5.25656e-185	4.98614e-184	412.208	PCSK7
ENSG00000155111	0.113316	5.7339	30.7066	5.79171e-185	5.49016e-184	412.091	CDK19
ENSG00000135250	0.0836399	6.60974	30.7005	6.73302e-185	6.37828e-184	411.942	SRPK2
ENSG00000258215	0.143586	1.05014	30.6988	7.02535e-185	6.65085e-184	412.074
ENSG00000088205	-0.0702396	6.11992	-30.671	1.39031e-184	1.31533e-183	411.247	DDX18
ENSG00000085382	-0.0890615	3.76997	-30.6703	1.41188e-184	1.33487e-183	411.363	HACE1
ENSG00000188917	-0.0698898	4.68187	-30.6576	1.92979e-184	1.82334e-183	410.989	TRMT2B
ENSG00000159882	0.10152	4.50507	30.6395	3.01248e-184	2.84444e-183	410.468	ZNF230
ENSG00000238005	0.157941	2.28234	30.638	3.12472e-184	2.94849e-183	410.528
ENSG00000180549	0.156969	4.10827	30.636	3.28286e-184	3.09569e-183	410.411	FUT7
ENSG00000223705	-0.13133	4.62184	-30.6168	5.25564e-184	4.95277e-183	410.017	NSUN5P1
ENSG00000132581	0.069578	4.78196	30.6149	5.50585e-184	5.18518e-183	409.86	SDF2
ENSG00000133030	-0.0867024	6.88608	-30.6089	6.37543e-184	6.00021e-183	409.718	MPRIP
ENSG00000120063	0.0765616	7.92083	30.6014	7.67141e-184	7.21522e-183	409.538	GNA13
ENSG00000213658	-0.130881	4.24705	-30.5964	8.66822e-184	8.14745e-183	409.54	LAT
ENSG00000264522	-0.103591	3.67778	-30.5922	9.61517e-184	9.03163e-183	409.457	OTUD7B
ENSG00000119723	-0.087267	3.39273	-30.5911	9.86404e-184	9.25939e-183	409.439	COQ6
ENSG00000137713	-0.0681151	4.85666	-30.5862	1.11257e-183	1.04369e-182	409.227	PPP2R1B
ENSG00000282572	0.196959	3.85264	30.5823	1.22446e-183	1.14791e-182	409.092	NA
ENSG00000126945	0.099328	6.4417	30.5802	1.28855e-183	1.20722e-182	408.996	HNRNPH2
ENSG00000213551	-0.092175	4.17633	-30.5447	3.07579e-183	2.87977e-182	408.266	DNAJC9
ENSG00000140718	-0.0935423	5.16972	-30.5405	3.41049e-183	3.19107e-182	408.102	FTO
ENSG00000263956	-0.0996991	4.69284	-30.5377	3.65495e-183	3.41759e-182	408.063	NBPF11
ENSG00000170190	0.115638	3.17596	30.5302	4.39446e-183	4.10642e-182	407.862	SLC16A5
ENSG00000138078	-0.076422	5.26326	-30.5272	4.73056e-183	4.41764e-182	407.763	PREPL
ENSG00000234444	-0.0827323	5.83258	-30.5197	5.67172e-183	5.29312e-182	407.56	ZNF736
ENSG00000159496	0.141554	3.49742	30.5182	5.8966e-183	5.49943e-182	407.544	RGL4
ENSG00000123600	-0.124467	4.07178	-30.5178	5.94816e-183	5.54395e-182	407.623	METTL8
ENSG00000135503	0.0899399	3.94623	30.5101	7.17711e-183	6.68507e-182	407.332	ACVR1B
ENSG00000064012	0.073522	7.74317	30.5041	8.32139e-183	7.74591e-182	407.153	CASP8
ENSG00000114030	0.0686939	6.47576	30.5028	8.59094e-183	7.99167e-182	407.096	KPNA1
ENSG00000007237	0.149684	6.04686	30.5013	8.90129e-183	8.27505e-182	407.07	GAS7
ENSG00000114450	0.107523	6.31112	30.4998	9.23401e-183	8.57885e-182	407.029	GNB4
ENSG00000144036	-0.0884239	4.23456	-30.497	9.90072e-183	9.19234e-182	407.094	EXOC6B
ENSG00000177646	-0.0724783	4.86564	-30.4888	1.20887e-182	1.12166e-181	406.849	ACAD9
ENSG00000196358	0.167722	4.20678	30.4866	1.27696e-182	1.18407e-181	406.737	NTNG2
ENSG00000160991	0.129892	6.51792	30.4862	1.28982e-182	1.19523e-181	406.702	ORAI2
ENSG00000180316	0.140556	2.0573	30.4824	1.41444e-182	1.30987e-181	406.742	PNPLA1
ENSG00000270157	-0.144926	2.88193	-30.473	1.78315e-182	1.65027e-181	406.551
ENSG00000173638	0.16786	5.12719	30.4721	1.82206e-182	1.6852e-181	406.365	SLC19A1
ENSG00000136279	0.0773767	8.09489	30.472	1.82599e-182	1.68776e-181	406.377	DBNL
ENSG00000165609	0.0665146	5.49004	30.4708	1.88053e-182	1.73706e-181	406.315	NUDT5
ENSG00000095319	-0.097249	4.62188	-30.4679	2.01748e-182	1.86237e-181	406.362	NUP188
ENSG00000185905	0.0951991	6.96261	30.4678	2.02312e-182	1.86638e-181	406.252	C16orf54
ENSG00000100445	-0.0997886	3.96758	-30.4654	2.14688e-182	1.97929e-181	406.341	SDR39U1
ENSG00000159322	0.0480361	7.00402	30.465	2.16619e-182	1.99582e-181	406.176	ADPGK
ENSG00000127507	0.173393	6.39347	30.4571	2.62847e-182	2.4202e-181	405.996	ADGRE2
ENSG00000151135	-0.14242	3.83409	-30.4497	3.15108e-182	2.89955e-181	405.975	TMEM263
ENSG00000101442	-0.0963305	3.32666	-30.4475	3.32136e-182	3.0543e-181	405.932	ACTR5
ENSG00000254469	-0.115463	3.41398	-30.4353	4.47551e-182	4.11303e-181	405.634
ENSG00000112996	-0.0855607	5.14173	-30.4338	4.64809e-182	4.26892e-181	405.494	MRPS30
ENSG00000137145	-0.0623122	6.64918	-30.4311	4.96685e-182	4.55878e-181	405.363	DENND4C
ENSG00000162613	-0.0645394	7.10728	-30.423	6.0475e-182	5.54712e-181	405.162	FUBP1
ENSG00000107672	-0.103824	4.20394	-30.4216	6.25945e-182	5.73725e-181	405.26	NSMCE4A
ENSG00000126759	0.13075	6.97732	30.4216	6.26271e-182	5.73725e-181	405.133	CFP
ENSG00000251230	0.170879	1.3864	30.4213	6.30275e-182	5.77027e-181	405.27	MIR3945HG
ENSG00000013810	0.108325	5.50866	30.4025	9.97046e-182	9.12234e-181	404.651	TACC3
ENSG00000185989	-0.0787071	6.61917	-30.4017	1.01811e-181	9.30917e-181	404.653	RASA3
ENSG00000136161	0.0885028	6.10021	30.3893	1.37768e-181	1.25889e-180	404.325	RCBTB2
ENSG00000089351	0.114507	4.77968	30.3875	1.44101e-181	1.31593e-180	404.3	GRAMD1A
ENSG00000113013	-0.0692514	6.62511	-30.3855	1.51289e-181	1.3807e-180	404.252	HSPA9
ENSG00000087589	0.130644	5.48351	30.3693	2.24687e-181	2.04926e-180	403.839	CASS4
ENSG00000256525	-0.0911161	3.60224	-30.3602	2.80789e-181	2.55933e-180	403.79	POLG2
ENSG00000138443	-0.117859	4.32629	-30.36	2.82057e-181	2.56926e-180	403.754	ABI2
ENSG00000133114	-0.0879716	4.33404	-30.3537	3.29041e-181	2.99535e-180	403.589	GPALPP1
ENSG00000113712	0.0438017	6.73924	30.346	3.96826e-181	3.61014e-180	403.268	CSNK1A1
ENSG00000111817	0.0988724	6.10387	30.3422	4.34721e-181	3.95241e-180	403.178	DSE
ENSG00000280128	-0.119406	4.25467	-30.34	4.59532e-181	4.17536e-180	403.271
ENSG00000074319	0.0665628	5.31941	30.3311	5.69873e-181	5.17468e-180	402.911	TSG101
ENSG00000119314	0.0907076	7.98367	30.3296	5.92019e-181	5.37239e-180	402.904	PTBP3
ENSG00000138613	0.0687688	5.03981	30.3256	6.53074e-181	5.92274e-180	402.782	APH1B
ENSG00000176095	0.103691	5.43954	30.3241	6.76576e-181	6.13203e-180	402.739	IP6K1
ENSG00000185477	-0.0919684	7.25611	-30.3234	6.88532e-181	6.23647e-180	402.741	GPRIN3
ENSG00000100629	-0.108571	4.14758	-30.319	7.65504e-181	6.92932e-180	402.766	CEP128
ENSG00000116266	0.0851182	6.20389	30.3175	7.94029e-181	7.18303e-180	402.577	STXBP3
ENSG00000215769	0.0939401	4.54709	30.3143	8.5867e-181	7.76294e-180	402.521
ENSG00000108256	0.0619618	8.15397	30.3109	9.33894e-181	8.43773e-180	402.446	NUFIP2
ENSG00000167333	-0.0868955	3.25683	-30.3066	1.03609e-180	9.35526e-180	402.499	TRIM68
ENSG00000082074	0.0880654	8.74941	30.2979	1.28252e-180	1.15731e-179	402.151	FYB
ENSG00000166272	0.0662955	5.8622	30.2925	1.46173e-180	1.3182e-179	401.963	WBP1L
ENSG00000168792	-0.0920592	4.13132	-30.2867	1.68664e-180	1.52008e-179	401.972	ABHD15
ENSG00000162869	0.0497522	5.51167	30.2859	1.71924e-180	1.54849e-179	401.807	PPP1R21
ENSG00000267519	0.141657	6.32553	30.2821	1.88637e-180	1.69797e-179	401.722	MIR24-2
ENSG00000185753	0.0520001	5.84367	30.2819	1.8934e-180	1.70323e-179	401.706	CXorf38
ENSG00000015676	-0.0623891	5.86377	-30.2699	2.53537e-180	2.27931e-179	401.456	NUDCD3
ENSG00000172840	-0.121321	2.61331	-30.2691	2.58931e-180	2.32635e-179	401.577	PDP2
ENSG00000048740	0.0849579	8.36115	30.2497	4.14503e-180	3.72177e-179	400.968	CELF2
ENSG00000011523	-0.109705	4.28806	-30.2419	5.01562e-180	4.50067e-179	400.88	CEP68
ENSG00000116406	0.0614425	6.79731	30.2272	7.1729e-180	6.43247e-179	400.381	EDEM3
ENSG00000107959	-0.0670543	5.18122	-30.2163	9.35456e-180	8.38373e-179	400.184	PITRM1
ENSG00000198182	-0.144582	2.79148	-30.2128	1.01829e-179	9.12046e-179	400.216	ZNF607
ENSG00000215424	-0.161296	2.84007	-30.2126	1.02408e-179	9.16663e-179	400.211	MCM3AP-AS1
ENSG00000166881	-0.0816305	4.47206	-30.209	1.11922e-179	1.0012e-178	400.056	NEMP1
ENSG00000069702	-0.196582	5.22808	-30.1959	1.53581e-179	1.37302e-178	399.732	TGFBR3
ENSG00000166478	0.0550415	5.21458	30.1849	2.00691e-179	1.79307e-178	399.359	ZNF143
ENSG00000165521	-0.16443	3.01618	-30.1769	2.44362e-179	2.1819e-178	399.347	EML5
ENSG00000127947	0.10506	5.82417	30.1635	3.38426e-179	3.01993e-178	398.83	PTPN12
ENSG00000094841	-0.0775973	3.5779	-30.1484	4.8846e-179	4.35606e-178	398.639	UPRT
ENSG00000084072	-0.095896	4.62573	-30.148	4.92323e-179	4.3878e-178	398.574	PPIE
ENSG00000088179	-0.0953708	7.34987	-30.1396	6.04584e-179	5.38501e-178	398.272	PTPN4
ENSG00000087448	-0.0737895	4.37305	-30.1297	7.67995e-179	6.83629e-178	398.138	KLHL42
ENSG00000037474	-0.0548901	5.63104	-30.1245	8.73005e-179	7.76625e-178	397.925	NSUN2
ENSG00000184939	-0.0952035	5.32073	-30.1156	1.08381e-178	9.63563e-178	397.743	ZFP90
ENSG00000196810	-0.0983698	3.42712	-30.1129	1.1554e-178	1.02658e-177	397.791	CTBP1-AS2
ENSG00000135316	-0.0664221	6.64979	-30.1098	1.24804e-178	1.10821e-177	397.545	SYNCRIP
ENSG00000109332	0.0771184	8.71775	30.1091	1.26735e-178	1.12467e-177	397.562	UBE2D3
ENSG00000172175	-0.075899	6.73801	-30.1048	1.40914e-178	1.24972e-177	397.427	MALT1
ENSG00000122085	-0.0871633	5.48214	-30.0913	1.95428e-178	1.73213e-177	397.144	MTERF4
ENSG00000276234	-0.074554	3.98238	-30.0899	2.02002e-178	1.7893e-177	397.198	TADA2A
ENSG00000154743	-0.105126	3.64043	-30.0878	2.12869e-178	1.88441e-177	397.175	TSEN2
ENSG00000203804	0.155406	4.11568	30.0871	2.16497e-178	1.91535e-177	397.012	ADAMTSL4-AS1
ENSG00000100099	-0.0666859	4.70287	-30.084	2.33217e-178	2.06201e-177	397.001	HPS4
ENSG00000176390	0.0664708	7.05182	30.0801	2.56243e-178	2.26421e-177	396.814	CRLF3
ENSG00000165240	0.0710555	6.10587	30.0791	2.629e-178	2.32162e-177	396.779	ATP7A
ENSG00000259494	-0.107715	3.62355	-30.0786	2.65655e-178	2.34451e-177	396.955	MRPL46
ENSG00000213626	-0.105484	7.10902	-30.0784	2.67113e-178	2.35594e-177	396.794	LBH
ENSG00000169062	-0.0889452	4.33167	-30.0753	2.88499e-178	2.54301e-177	396.823	UPF3A
ENSG00000204569	0.0613721	5.59115	30.0699	3.28774e-178	2.89625e-177	396.558	PPP1R10
ENSG00000205133	0.111862	4.11724	30.0569	4.50023e-178	3.96196e-177	396.287	TRIQK
ENSG00000119541	0.0690097	6.68975	30.0532	4.93069e-178	4.33829e-177	396.155	VPS4B
ENSG00000079950	0.0808673	7.95922	30.0527	4.98569e-178	4.38401e-177	396.174	STX7
ENSG00000065802	-0.0723117	4.84708	-30.0413	6.56922e-178	5.77292e-177	395.96	ASB1
ENSG00000068024	0.104546	5.91047	30.0334	7.95832e-178	6.9894e-177	395.675	HDAC4
ENSG00000164338	-0.101449	3.70944	-30.026	9.51958e-178	8.3555e-177	395.675	UTP15
ENSG00000136319	-0.0686503	4.38773	-30.0251	9.73058e-178	8.53551e-177	395.599	TTC5
ENSG00000167261	0.121837	5.72085	30.019	1.13016e-177	9.90756e-177	395.328	DPEP2
ENSG00000159110	0.0719241	6.64878	30.0157	1.22245e-177	1.07102e-176	395.248	IFNAR2
ENSG00000151612	-0.184548	3.27843	-30.0107	1.38037e-177	1.20864e-176	395.325	ZNF827
ENSG00000100605	0.13495	6.13145	30.0094	1.42661e-177	1.24837e-176	395.101	ITPK1
ENSG00000198399	0.0497619	7.834	30.0093	1.42803e-177	1.24886e-176	395.113	ITSN2
ENSG00000105486	-0.116438	3.65574	-30.0055	1.56499e-177	1.36781e-176	395.186	LIG1
ENSG00000178927	0.105495	6.27543	30.0049	1.58746e-177	1.38661e-176	394.99	C17orf62
ENSG00000100483	0.086189	3.92632	30.0038	1.6326e-177	1.42517e-176	395.017	VCPKMT
ENSG00000146285	-0.0963327	6.05797	-29.9954	1.99884e-177	1.74382e-176	394.8	SCML4
ENSG00000134852	-0.0900419	4.60002	-29.9938	2.07955e-177	1.81314e-176	394.834	CLOCK
ENSG00000250608	0.101659	3.36929	29.9916	2.19389e-177	1.91169e-176	394.752
ENSG00000080608	-0.105974	4.04822	-29.9886	2.35885e-177	2.05419e-176	394.751	PUM3
ENSG00000204427	0.0825153	5.34349	29.9804	2.87909e-177	2.50572e-176	394.397	ABHD16A
ENSG00000076554	-0.159377	4.08684	-29.9798	2.91868e-177	2.53865e-176	394.551	TPD52
ENSG00000237135	0.139216	2.17919	29.9761	3.19225e-177	2.77494e-176	394.434	DDX10P1
ENSG00000198851	-0.170011	3.8483	-29.9701	3.69253e-177	3.20788e-176	394.329	CD3E
ENSG00000101152	0.0867889	6.59804	29.9667	4.00511e-177	3.47735e-176	394.066	DNAJC5
ENSG00000159917	-0.0853772	3.8774	-29.966	4.08e-177	3.54025e-176	394.207	ZNF235
ENSG00000125810	0.157325	8.07427	29.9654	4.13979e-177	3.58997e-176	394.08	CD93
ENSG00000071553	0.0816704	5.39211	29.9618	4.51449e-177	3.91256e-176	393.945	ATP6AP1
ENSG00000130348	-0.105377	4.20707	-29.9607	4.63274e-177	4.01263e-176	394.069	QRSL1
ENSG00000154930	-0.0832637	5.20855	-29.9534	5.53897e-177	4.79469e-176	393.817	ACSS1
ENSG00000133935	-0.106958	2.38405	-29.9408	7.50972e-177	6.49674e-176	393.616	C14orf1
ENSG00000135297	-0.076003	5.20669	-29.9307	9.58595e-177	8.28795e-176	393.264	MTO1
ENSG00000155229	-0.0572845	5.35829	-29.9301	9.71545e-177	8.39489e-176	393.235	MMS19
ENSG00000123552	-0.132051	3.51929	-29.9298	9.79526e-177	8.4588e-176	393.361	USP45
ENSG00000162889	0.0888463	5.90041	29.9246	1.11082e-176	9.58691e-176	393.041	MAPKAPK2
ENSG00000082516	-0.0831278	4.38425	-29.921	1.21337e-176	1.04657e-175	393.087	GEMIN5
ENSG00000112299	0.224831	4.76972	29.9111	1.541e-176	1.32837e-175	392.743	VNN1
ENSG00000173327	0.104103	5.54126	29.9085	1.642e-176	1.41459e-175	392.658	MAP3K11
ENSG00000229852	-0.167131	1.68206	-29.9038	1.83929e-176	1.58361e-175	392.608
ENSG00000203791	-0.0981603	3.72546	-29.8961	2.21111e-176	1.90261e-175	392.532	METTL10
ENSG00000141574	0.164738	5.71624	29.8944	2.30513e-176	1.98233e-175	392.327	SECTM1
ENSG00000178202	-0.130875	2.81865	-29.8901	2.5592e-176	2.19951e-175	392.409	KDELC2
ENSG00000256223	-0.131451	3.14983	-29.8898	2.57644e-176	2.21301e-175	392.404	ZNF10
ENSG00000196284	-0.151265	2.78721	-29.8772	3.4968e-176	3.00177e-175	392.094	SUPT3H
ENSG00000114353	0.0983797	7.65505	29.8742	3.75954e-176	3.22539e-175	391.852	GNAI2
ENSG00000145476	-0.116672	4.99098	-29.8728	3.88691e-176	3.33269e-175	391.897	CYP4V2
ENSG00000237772	0.130968	2.51752	29.868	4.36697e-176	3.74208e-175	391.804
ENSG00000111674	-0.144127	3.30412	-29.8618	5.07498e-176	4.3462e-175	391.727	ENO2
ENSG00000163655	-0.0653407	5.23805	-29.859	5.42708e-176	4.64499e-175	391.526	GMPS
ENSG00000174500	-0.162652	3.87246	-29.857	5.69493e-176	4.87136e-175	391.599	GCSAM
ENSG00000008517	-0.146105	4.65282	-29.8553	5.93315e-176	5.07213e-175	391.51	IL32
ENSG00000244482	0.185582	5.1403	29.845	7.61548e-176	6.50647e-175	391.135	LILRA6
ENSG00000224397	0.169783	4.6623	29.8433	7.94008e-176	6.77979e-175	391.098	LINC01272
ENSG00000143570	0.0814312	4.93741	29.8418	8.22613e-176	7.01989e-175	391.057	SLC39A1
ENSG00000102524	0.148447	6.27861	29.8403	8.51993e-176	7.26632e-175	391.019	TNFSF13B
ENSG00000134987	-0.0801766	5.43541	-29.8396	8.68332e-176	7.4013e-175	391.056	WDR36
ENSG00000141040	-0.161719	3.04312	-29.8388	8.83532e-176	7.52642e-175	391.174	ZNF287
ENSG00000107745	0.07488	4.44653	29.8372	9.18462e-176	7.81937e-175	390.967	MICU1
ENSG00000110651	-0.125265	4.85384	-29.8372	9.20082e-176	7.82855e-175	391.051	CD81
ENSG00000101158	-0.0714497	4.74482	-29.8369	9.25646e-176	7.87125e-175	391.028	NELFCD
ENSG00000114739	-0.149025	3.91792	-29.8344	9.82734e-176	8.3518e-175	391.048	ACVR2B
ENSG00000136827	0.0591154	4.8638	29.8322	1.03701e-175	8.80784e-175	390.833	TOR1A
ENSG00000128694	-0.127028	2.6794	-29.8292	1.11434e-175	9.45916e-175	390.937	OSGEPL1
ENSG00000204519	-0.0976525	4.27558	-29.8231	1.29059e-175	1.09488e-174	390.74	ZNF551
ENSG00000269609	-0.0974503	4.19405	-29.821	1.35891e-175	1.15216e-174	390.693	RPARP-AS1
ENSG00000284428	-0.128798	3.52694	-29.8199	1.39736e-175	1.18407e-174	390.708	NA
ENSG00000156875	0.0633275	5.98906	29.8144	1.59403e-175	1.34993e-174	390.379	MFSD14A
ENSG00000213930	-0.0952142	5.12524	-29.8099	1.77522e-175	1.50249e-174	390.367	GALT
ENSG00000236213	-0.196493	2.75572	-29.8019	2.15443e-175	1.82238e-174	390.274
ENSG00000119514	-0.147251	2.05908	-29.7986	2.33184e-175	1.97129e-174	390.144	GALNT12
ENSG00000083168	0.0818504	8.19993	29.7958	2.49962e-175	2.1119e-174	389.971	KAT6A
ENSG00000182108	-0.0928579	3.84554	-29.7923	2.71886e-175	2.29579e-174	390.022	DEXI
ENSG00000135407	0.146799	3.51841	29.7843	3.29642e-175	2.78185e-174	389.721	AVIL
ENSG00000108578	-0.0827237	3.99954	-29.7841	3.3125e-175	2.79378e-174	389.809	BLMH
ENSG00000115875	-0.0744487	6.47242	-29.7647	5.28825e-175	4.45755e-174	389.21	SRSF7
ENSG00000176624	-0.0850597	6.11709	-29.7639	5.38902e-175	4.53984e-174	389.205	MEX3C
ENSG00000081307	-0.107802	4.45077	-29.7624	5.58435e-175	4.70165e-174	389.268	UBA5
ENSG00000157654	-0.14874	4.86371	-29.7606	5.84367e-175	4.91712e-174	389.216	PALM2-AKAP2
ENSG00000205060	-0.0630194	4.16857	-29.7513	7.30923e-175	6.14673e-174	388.999	SLC35B4
ENSG00000172775	0.0406522	5.98181	29.7404	9.50465e-175	7.98833e-174	388.596	FAM192A
ENSG00000161048	-0.0907207	3.62282	-29.7397	9.66685e-175	8.11993e-174	388.766	NAPEPLD
ENSG00000126858	0.0810629	5.9598	29.7335	1.12293e-174	9.42659e-174	388.431	RHOT1
ENSG00000129347	-0.0946224	4.28028	-29.7334	1.12355e-174	9.42659e-174	388.579	KRI1
ENSG00000009954	-0.0615691	6.23392	-29.7163	1.69679e-174	1.42278e-173	388.047	BAZ1B
ENSG00000154928	0.161206	5.15635	29.7126	1.85613e-174	1.55549e-173	387.94	EPHB1
ENSG00000074935	-0.126003	3.52032	-29.7053	2.21263e-174	1.85318e-173	387.952	TUBE1
ENSG00000164715	0.11327	5.51894	29.7033	2.32343e-174	1.94485e-173	387.707	LMTK2
ENSG00000124831	0.0777425	8.47992	29.702	2.39749e-174	2.00568e-173	387.721	LRRFIP1
ENSG00000023516	-0.0775376	6.30554	-29.6997	2.53142e-174	2.1165e-173	387.653	AKAP11
ENSG00000255163	0.119271	2.72888	29.6888	3.29379e-174	2.75232e-173	387.48	HSPE1P18
ENSG00000135956	0.110262	5.90552	29.6864	3.49317e-174	2.91723e-173	387.3	TMEM127
ENSG00000014257	0.133833	4.78215	29.6861	3.51666e-174	2.93515e-173	387.307	ACPP
ENSG00000134905	0.0780429	6.08712	29.6855	3.56348e-174	2.97251e-173	387.278	CARS2
ENSG00000234663	-0.184603	3.82676	-29.6801	4.05652e-174	3.38184e-173	387.343
ENSG00000104388	0.0722994	5.86604	29.6565	7.17506e-174	5.97825e-173	386.579	RAB2A
ENSG00000124588	0.172934	4.57975	29.6501	8.36862e-174	6.96871e-173	386.45	NQO2
ENSG00000054523	0.139437	5.88614	29.648	8.79863e-174	7.32257e-173	386.382	KIF1B
ENSG00000170846	-0.115683	4.04404	-29.6421	1.01271e-173	8.4233e-173	386.405
ENSG00000171817	-0.174641	3.13736	-29.6407	1.04847e-173	8.71572e-173	386.409	ZNF540
ENSG00000115053	-0.0759952	7.17512	-29.6377	1.12733e-173	9.36593e-173	386.146	NCL
ENSG00000138641	0.0812359	7.09959	29.6287	1.40002e-173	1.16248e-172	385.924	HERC3
ENSG00000197555	0.122191	6.99784	29.6232	1.59769e-173	1.32584e-172	385.798	SIPA1L1
ENSG00000272037	0.127327	1.11377	29.6123	2.07519e-173	1.72111e-172	385.722
ENSG00000089006	-0.0562334	6.08279	-29.6082	2.29076e-173	1.89881e-172	385.448	SNX5
ENSG00000073756	0.141534	4.95386	29.6027	2.6151e-173	2.16641e-172	385.302	PTGS2
ENSG00000089902	0.121236	5.7274	29.5996	2.81259e-173	2.32868e-172	385.218	RCOR1
ENSG00000146122	0.321729	0.997266	29.5976	2.95526e-173	2.4454e-172	385.333	DAAM2
ENSG00000101384	0.110342	2.47019	29.5952	3.12632e-173	2.58547e-172	385.259	JAG1
ENSG00000120697	-0.0839983	4.30007	-29.5946	3.17303e-173	2.6226e-172	385.234	ALG5
ENSG00000187116	0.177134	6.70653	29.5871	3.8009e-173	3.13976e-172	384.94	LILRA5
ENSG00000137513	-0.100885	3.34015	-29.5859	3.91378e-173	3.23116e-172	385.087	NARS2
ENSG00000285006	0.153834	1.60943	29.5838	4.11197e-173	3.39285e-172	385.003	NA
ENSG00000116260	0.108845	4.61581	29.5782	4.71128e-173	3.88513e-172	384.726	QSOX1
ENSG00000139505	0.0842515	6.3845	29.5737	5.25255e-173	4.32901e-172	384.594	MTMR6
ENSG00000168813	-0.0745565	5.54789	-29.5721	5.45738e-173	4.49527e-172	384.611	ZNF507
ENSG00000090097	-0.170437	1.81328	-29.5695	5.80396e-173	4.77802e-172	384.613	PCBP4
ENSG00000178028	-0.0717279	4.51847	-29.5652	6.43617e-173	5.29546e-172	384.507	DMAP1
ENSG00000183019	0.162201	1.50619	29.5433	1.0883e-172	8.94909e-172	384.033	MCEMP1
ENSG00000157036	-0.119633	3.14971	-29.5402	1.17253e-172	9.63624e-172	383.999	EXOG
ENSG00000080561	-0.179125	2.88575	-29.5362	1.29039e-172	1.05988e-171	383.9	MID2
ENSG00000089639	0.12313	5.65899	29.5337	1.3695e-172	1.12422e-171	383.641	GMIP
ENSG00000135378	0.180152	4.40809	29.5278	1.57848e-172	1.29503e-171	383.524	PRRG4
ENSG00000277053	0.124601	6.22553	29.5272	1.60223e-172	1.31377e-171	383.484	GTF2IP1
ENSG00000119509	-0.0721234	4.61447	-29.5196	1.9241e-172	1.57681e-171	383.408	INVS
ENSG00000111229	0.0886598	7.57772	29.508	2.53754e-172	2.07834e-171	383.045	ARPC3
ENSG00000102882	0.118605	4.79261	29.5021	2.92944e-172	2.39796e-171	382.896	MAPK3
ENSG00000133063	0.140998	1.91939	29.5016	2.9646e-172	2.42537e-171	383.029	CHIT1
ENSG00000168040	0.0815627	4.50997	29.4983	3.20542e-172	2.6209e-171	382.818	FADD
ENSG00000179409	-0.0963371	3.72204	-29.4868	4.21936e-172	3.448e-171	382.697	GEMIN4
ENSG00000140575	0.127629	9.71771	29.4856	4.35062e-172	3.55325e-171	382.576	IQGAP1
ENSG00000145241	-0.0792436	6.0807	-29.4842	4.49992e-172	3.67312e-171	382.487	CENPC
ENSG00000261471	0.140762	1.79112	29.4832	4.60035e-172	3.75297e-171	382.593
ENSG00000070190	0.0951778	7.01823	29.4821	4.7248e-172	3.85232e-171	382.412	DAPP1
ENSG00000118855	0.0810194	6.49953	29.4761	5.45983e-172	4.44912e-171	382.257	MFSD1
ENSG00000100522	-0.113549	3.0915	-29.4726	5.93555e-172	4.83404e-171	382.382	GNPNAT1
ENSG00000215196	0.180465	0.417553	29.4609	7.86443e-172	6.40136e-171	382.094
ENSG00000183943	-0.0636463	5.88782	-29.4522	9.67948e-172	7.87431e-171	381.726	PRKX
ENSG00000166313	-0.149197	4.02635	-29.4502	1.0151e-171	8.25323e-171	381.819	APBB1
ENSG00000175938	0.0856173	4.24701	29.442	1.2358e-171	1.0042e-170	381.486	ORAI3
ENSG00000204713	0.0583709	6.51493	29.4395	1.31231e-171	1.06577e-170	381.377	TRIM27
ENSG00000182197	0.0928611	4.3534	29.4379	1.36467e-171	1.10767e-170	381.375	EXT1
ENSG00000242616	0.180783	5.07117	29.4318	1.57755e-171	1.27975e-170	381.213	GNG10
ENSG00000274712	-0.170913	1.65452	-29.4248	1.86528e-171	1.51231e-170	381.117
ENSG00000213719	0.10521	7.96101	29.4217	2.00791e-171	1.62704e-170	380.993	CLIC1
ENSG00000111962	-0.16332	2.61511	-29.4213	2.02766e-171	1.64212e-170	381.142	UST
ENSG00000171453	-0.0962845	3.26113	-29.412	2.5349e-171	2.05176e-170	380.927	POLR1C
ENSG00000197548	0.0865269	5.85099	29.3969	3.6395e-171	2.94418e-170	380.357	ATG7
ENSG00000118596	-0.0878718	6.02963	-29.3867	4.64821e-171	3.75809e-170	380.164	SLC16A7
ENSG00000162415	-0.203852	1.68354	-29.3777	5.75644e-171	4.65149e-170	379.985	ZSWIM5
ENSG00000167851	0.105592	6.69	29.3692	7.05127e-171	5.69459e-170	379.708	CD300A
ENSG00000142065	-0.107802	4.58757	-29.3675	7.34962e-171	5.93223e-170	379.79	ZFP14
ENSG00000280135	-0.141932	2.8764	-29.3406	1.3985e-170	1.12816e-169	379.229
ENSG00000143376	0.129184	6.07496	29.3387	1.46447e-170	1.18072e-169	378.974	SNX27
ENSG00000135363	0.103911	5.37474	29.3267	1.95155e-170	1.57256e-169	378.686	LMO2
ENSG00000267385	0.165859	0.631289	29.3192	2.33234e-170	1.87835e-169	378.71
ENSG00000095002	-0.113651	4.28675	-29.313	2.70499e-170	2.17725e-169	378.512	MSH2
ENSG00000198818	0.0656437	4.77012	29.3054	3.24369e-170	2.60939e-169	378.198	SFT2D1
ENSG00000233013	0.212366	4.90085	29.3011	3.59292e-170	2.88872e-169	378.1	FAM157B
ENSG00000058063	0.0767086	7.91739	29.3003	3.66315e-170	2.94355e-169	378.085	ATP11B
ENSG00000269918	-0.156162	2.27199	-29.2989	3.78721e-170	3.04155e-169	378.203
ENSG00000137054	-0.112519	3.57167	-29.2974	3.92865e-170	3.15339e-169	378.183	POLR1E
ENSG00000153339	0.0582615	7.05966	29.2937	4.28999e-170	3.44151e-169	377.903	TRAPPC8
ENSG00000155275	-0.0791389	3.68353	-29.2904	4.64322e-170	3.72281e-169	378.001	TRMT44
ENSG00000100284	0.114953	5.17019	29.2897	4.72407e-170	3.78554e-169	377.815	TOM1
ENSG00000181666	-0.0965376	4.3417	-29.2883	4.87521e-170	3.90449e-169	377.913	HKR1
ENSG00000179222	-0.12798	2.44081	-29.2877	4.95348e-170	3.96497e-169	377.954	MAGED1
ENSG00000164024	-0.0651772	4.04478	-29.2871	5.02311e-170	4.01849e-169	377.89	METAP1
ENSG00000135074	0.116724	6.21236	29.2791	6.07901e-170	4.86052e-169	377.551	ADAM19
ENSG00000041802	-0.0746026	4.87391	-29.2632	8.88621e-170	7.10111e-169	377.265	LSG1
ENSG00000271856	-0.142651	3.58083	-29.2618	9.17411e-170	7.32712e-169	377.342	LINC01215
ENSG00000048028	-0.115564	5.3101	-29.2601	9.57132e-170	7.64015e-169	377.181	USP28
ENSG00000146833	-0.0480364	5.38209	-29.2575	1.01803e-169	8.12173e-169	377.086	TRIM4
ENSG00000141337	0.0846033	5.30461	29.2563	1.04619e-169	8.34181e-169	377.008	ARSG
ENSG00000215158	-0.103436	4.96676	-29.2545	1.09396e-169	8.71788e-169	377.066
ENSG00000166263	-0.125148	3.67001	-29.2527	1.14247e-169	9.09949e-169	377.113	STXBP4
ENSG00000044446	0.0685056	5.18526	29.2515	1.17376e-169	9.34357e-169	376.898	PHKA2
ENSG00000167555	-0.118019	4.46666	-29.2448	1.3763e-169	1.09498e-168	376.875	ZNF528
ENSG00000147526	0.0749452	7.70663	29.2409	1.51191e-169	1.20221e-168	376.663	TACC1
ENSG00000140526	0.137229	7.95526	29.2344	1.76408e-169	1.40195e-168	376.53	ABHD2
ENSG00000168887	0.0454561	5.92817	29.2166	2.69743e-169	2.14253e-168	376.057	C2orf68
ENSG00000186432	0.0539892	6.94185	29.2123	2.99363e-169	2.37649e-168	375.96	KPNA4
ENSG00000248124	-0.133789	3.8328	-29.208	3.31494e-169	2.63012e-168	376.045	RRN3P1
ENSG00000100347	-0.0657006	4.33018	-29.205	3.56018e-169	2.82315e-168	375.915	SAMM50
ENSG00000160410	0.148107	6.10605	29.2043	3.62207e-169	2.87065e-168	375.779	SHKBP1
ENSG00000255733	-0.238757	3.59843	-29.203	3.73398e-169	2.95772e-168	375.951	IFNG-AS1
ENSG00000119684	-0.0830082	5.13175	-29.2024	3.7848e-169	2.99634e-168	375.806	MLH3
ENSG00000171130	-0.130522	3.55067	-29.2006	3.95616e-169	3.13028e-168	375.884	ATP6V0E2
ENSG00000181016	0.158116	2.1651	29.1969	4.31505e-169	3.41238e-168	375.731	LSMEM1
ENSG00000197579	0.111542	6.49738	29.1883	5.29848e-169	4.1878e-168	375.393	TOPORS
ENSG00000138380	-0.100474	4.0027	-29.1881	5.32858e-169	4.20929e-168	375.549	CARF
ENSG00000086189	-0.0934099	3.93161	-29.1866	5.51227e-169	4.35201e-168	375.52	DIMT1
ENSG00000070614	0.161477	5.25776	29.1749	7.29576e-169	5.75696e-168	375.077	NDST1
ENSG00000075651	0.103294	4.07784	29.171	8.00769e-169	6.31528e-168	375.018	PLD1
ENSG00000269825	-0.125643	3.70843	-29.1669	8.82887e-169	6.95911e-168	375.071
ENSG00000162521	-0.0432247	6.47338	-29.1647	9.30609e-169	7.33128e-168	374.837	RBBP4
ENSG00000182511	0.137862	5.93539	29.1632	9.63734e-169	7.5881e-168	374.804	FES
ENSG00000179981	-0.100066	3.69041	-29.1608	1.0201e-168	8.0275e-168	374.922	TSHZ1
ENSG00000249662	0.152217	1.98266	29.1587	1.07196e-168	8.43104e-168	374.833
ENSG00000260528	0.216834	6.35393	29.157	1.1167e-168	8.77813e-168	374.667	FAM157C
ENSG00000220323	0.0924045	3.95005	29.1553	1.16376e-168	9.14309e-168	374.657	HIST2H2BD
ENSG00000070831	0.0567307	8.82128	29.1514	1.27489e-168	1.00107e-167	374.561	CDC42
ENSG00000137161	0.0867692	5.64514	29.1447	1.4956e-168	1.17374e-167	374.35	CNPY3
ENSG00000175414	-0.15806	3.3353	-29.1384	1.73768e-168	1.36299e-167	374.416	ARL10
ENSG00000285851	0.138827	4.09345	29.1374	1.78164e-168	1.39645e-167	374.217	NA
ENSG00000153896	-0.13516	1.71927	-29.1374	1.78227e-168	1.39645e-167	374.304	ZNF599
ENSG00000172530	0.0739824	5.43703	29.1365	1.81771e-168	1.42345e-167	374.159	BANP
ENSG00000099985	0.148754	2.11265	29.1358	1.84947e-168	1.44754e-167	374.297	OSM
ENSG00000196182	0.130371	5.54929	29.1323	2.01266e-168	1.57441e-167	374.059	STK40
ENSG00000138029	0.0526098	6.2531	29.1241	2.44557e-168	1.91202e-167	373.855	HADHB
ENSG00000241553	0.0730345	7.42827	29.1155	3.00185e-168	2.34566e-167	373.671	ARPC4
ENSG00000162542	-0.104509	3.23191	-29.113	3.18372e-168	2.48643e-167	373.808	TMCO4
ENSG00000174885	0.171578	3.29296	29.102	4.13799e-168	3.22996e-167	373.423	NLRP6
ENSG00000134899	-0.0456922	6.85715	-29.0875	5.82997e-168	4.54819e-167	373	ERCC5
ENSG00000161921	0.149029	3.62482	29.0829	6.51031e-168	5.07621e-167	372.945	CXCL16
ENSG00000109944	-0.177235	1.65697	-29.0781	7.28891e-168	5.68024e-167	372.872	C11orf63
ENSG00000086475	-0.0730065	4.03793	-29.0748	7.89537e-168	6.14954e-167	372.847	SEPHS1
ENSG00000123146	0.138319	7.93966	29.0675	9.39115e-168	7.31064e-167	372.561	ADGRE5
ENSG00000119121	0.170492	4.98596	29.056	1.23282e-167	9.59181e-167	372.257	TRPM6
ENSG00000139675	-0.126808	2.22829	-29.0514	1.37544e-167	1.06957e-166	372.329	HNRNPA1L2
ENSG00000245680	-0.0886027	3.94885	-29.0446	1.61838e-167	1.25782e-166	372.14	ZNF585B
ENSG00000176953	-0.0611661	5.02139	-29.0427	1.69147e-167	1.31391e-166	372.009	NFATC2IP
ENSG00000166405	-0.170796	3.91464	-29.0214	2.80479e-167	2.17755e-166	371.623	RIC3
ENSG00000171608	0.105514	7.50305	29.012	3.5095e-167	2.7232e-166	371.224	PIK3CD
ENSG00000229124	0.0764268	4.45756	29.0081	3.84476e-167	2.98175e-166	371.141	VIM-AS1
ENSG00000241490	-0.17888	2.00356	-28.9894	5.99911e-167	4.65003e-166	370.829
ENSG00000286288	0.165749	2.98623	28.9858	6.52723e-167	5.05668e-166	370.672	NA
ENSG00000109458	0.116484	5.07542	28.9682	9.91392e-167	7.67625e-166	370.17	GAB1
ENSG00000174238	0.0908051	5.80013	28.957	1.29245e-166	1.0002e-165	369.895	PITPNA
ENSG00000172936	0.114932	6.21667	28.9556	1.33639e-166	1.03364e-165	369.868	MYD88
ENSG00000142634	0.108722	6.75503	28.9543	1.37684e-166	1.06437e-165	369.847	EFHD2
ENSG00000137752	0.0974013	7.29508	28.9529	1.42495e-166	1.10097e-165	369.82	CASP1
ENSG00000112130	-0.0810919	3.51505	-28.9492	1.55701e-166	1.20236e-165	369.908	RNF8
ENSG00000165526	-0.0802465	3.96106	-28.9473	1.62537e-166	1.25448e-165	369.838	RPUSD4
ENSG00000185986	-0.12592	2.82179	-28.9371	2.06999e-166	1.59678e-165	369.65	SDHAP3
ENSG00000183309	-0.0558434	4.91021	-28.936	2.12573e-166	1.63891e-165	369.485	ZNF623
ENSG00000182117	0.10421	5.29944	28.932	2.33758e-166	1.80128e-165	369.31	NOP10
ENSG00000105397	0.0938013	7.13506	28.9198	3.12478e-166	2.4066e-165	369.032	TYK2
ENSG00000138363	-0.117647	2.9331	-28.9194	3.15054e-166	2.42515e-165	369.231	ATIC
ENSG00000070413	0.102198	6.14286	28.9067	4.25428e-166	3.27301e-165	368.712	DGCR2
ENSG00000213613	0.117615	2.73201	28.9042	4.52187e-166	3.47703e-165	368.777
ENSG00000184083	-0.10936	2.81543	-28.9039	4.54823e-166	3.49544e-165	368.865	FAM120C
ENSG00000125245	-0.174688	2.87903	-28.9027	4.68045e-166	3.59514e-165	368.835	GPR18
ENSG00000135272	-0.0975294	5.924	-28.9024	4.71794e-166	3.62201e-165	368.661	MDFIC
ENSG00000067992	0.0973981	7.05928	28.8988	5.13525e-166	3.94029e-165	368.533	PDK3
ENSG00000146143	-0.0776298	3.81447	-28.8987	5.14814e-166	3.94809e-165	368.692	PRIM2
ENSG00000136937	-0.0555892	5.68519	-28.8939	5.75824e-166	4.41363e-165	368.447	NCBP1
ENSG00000174132	0.111157	3.15005	28.8796	8.08116e-166	6.19085e-165	368.172	FAM174A
ENSG00000183726	0.0713826	6.31055	28.8758	8.8449e-166	6.77234e-165	367.975	TMEM50A
ENSG00000148110	0.0901423	6.22795	28.8744	9.13772e-166	6.99285e-165	367.944	MFSD14B
ENSG00000184557	0.178219	5.19331	28.8729	9.47517e-166	7.24725e-165	367.924	SOCS3
ENSG00000085662	-0.0965822	4.43784	-28.8641	1.168e-165	8.92896e-165	367.841	AKR1B1
ENSG00000160570	0.0979804	5.70293	28.8623	1.21905e-165	9.31429e-165	367.662	DEDD2
ENSG00000115368	-0.0916532	4.93808	-28.8594	1.30281e-165	9.94896e-165	367.694	WDR75
ENSG00000163069	-0.152321	1.92829	-28.8531	1.51465e-165	1.15606e-164	367.606	SGCB
ENSG00000001167	0.0509398	5.79733	28.8528	1.52543e-165	1.16367e-164	367.43	NFYA
ENSG00000113716	-0.0645207	4.96075	-28.8424	1.94904e-165	1.48604e-164	367.277	HMGXB3
ENSG00000104093	0.114089	8.2911	28.8418	1.97708e-165	1.50662e-164	367.224	DMXL2
ENSG00000007392	-0.0784499	4.89716	-28.8327	2.45103e-165	1.86681e-164	367.056	LUC7L
ENSG00000117139	0.0771702	5.92202	28.8327	2.4538e-165	1.86794e-164	366.955	KDM5B
ENSG00000120656	0.0687743	4.07964	28.8289	2.68324e-165	2.04152e-164	366.93	TAF12
ENSG00000165355	0.0630839	5.55804	28.8216	3.1872e-165	2.42368e-164	366.696	FBXO33
ENSG00000004139	-0.128182	3.69984	-28.8175	3.51024e-165	2.66793e-164	366.802	SARM1
ENSG00000170854	-0.0841058	4.79884	-28.8149	3.73917e-165	2.84043e-164	366.648	MINA
ENSG00000253276	0.106381	4.51649	28.8129	3.91285e-165	2.97081e-164	366.518	CCDC71L
ENSG00000151779	-0.0538168	6.63211	-28.8112	4.08e-165	3.09609e-164	366.465	NBAS
ENSG00000140443	0.158979	6.22005	28.7829	7.95861e-165	6.03618e-164	365.794	IGF1R
ENSG00000107815	-0.109417	2.54974	-28.7799	8.54177e-165	6.47509e-164	365.934	C10orf2
ENSG00000166548	0.0845743	4.89234	28.7694	1.09534e-164	8.29889e-164	365.477	TK2
ENSG00000243667	-0.102434	2.56931	-28.7665	1.17205e-164	8.87542e-164	365.621	WDR92
ENSG00000103507	0.0927935	4.02579	28.7635	1.25781e-164	9.51982e-164	365.384	BCKDK
ENSG00000112697	0.0758575	7.48284	28.758	1.43254e-164	1.08366e-163	365.216	TMEM30A
ENSG00000147853	-0.0891381	4.30956	-28.7368	2.36342e-164	1.7869e-163	364.843	AK3
ENSG00000165209	-0.146712	4.69897	-28.7354	2.44263e-164	1.84583e-163	364.809	STRBP
ENSG00000112715	0.104973	3.11162	28.7345	2.49262e-164	1.88262e-163	364.754	VEGFA
ENSG00000055208	0.0628882	7.0288	28.7267	2.99818e-164	2.26327e-163	364.465	TAB2
ENSG00000232956	-0.0958432	3.74349	-28.7193	3.57193e-164	2.69498e-163	364.475	SNHG15
ENSG00000261997	0.134782	3.74119	28.7187	3.61486e-164	2.72595e-163	364.333
ENSG00000141447	0.105382	3.20776	28.718	3.67537e-164	2.77014e-163	364.359	OSBPL1A
ENSG00000166133	-0.127131	2.41304	-28.7131	4.12746e-164	3.10925e-163	364.356	RPUSD2
ENSG00000125944	-0.0626426	6.87728	-28.7119	4.25209e-164	3.20147e-163	364.125	HNRNPR
ENSG00000244617	0.162594	2.98072	28.7107	4.37474e-164	3.2921e-163	364.176	ASPRV1
ENSG00000165055	-0.0800091	4.15078	-28.7104	4.40457e-164	3.31283e-163	364.231	METTL2B
ENSG00000185101	-0.165102	3.62776	-28.7094	4.50236e-164	3.38462e-163	364.266	ANO9
ENSG00000104490	-0.170379	3.75098	-28.7011	5.48136e-164	4.11843e-163	364.062	NCALD
ENSG00000147124	-0.066586	4.20767	-28.689	7.29121e-164	5.47541e-163	363.715	ZNF41
ENSG00000197771	0.0652404	6.69838	28.6884	7.39727e-164	5.55218e-163	363.558	MCMBP
ENSG00000198879	-0.0808925	5.31225	-28.6856	7.89869e-164	5.92545e-163	363.566	SFMBT2
ENSG00000163545	0.127737	5.31975	28.6846	8.08746e-164	6.06391e-163	363.473	NUAK2
ENSG00000144655	0.126447	4.78097	28.6785	9.33247e-164	6.99379e-163	363.344	CSRNP1
ENSG00000204389	0.165612	7.25981	28.6705	1.1282e-163	8.45038e-163	363.171	HSPA1A
ENSG00000198000	-0.0640915	5.4316	-28.6667	1.23343e-163	9.23379e-163	363.105	NOL8
ENSG00000162086	-0.084531	4.86918	-28.6663	1.24478e-163	9.31394e-163	363.141	ZNF75A
ENSG00000197471	-0.0915197	6.78436	-28.6619	1.38031e-163	1.03227e-162	362.962	SPN
ENSG00000088930	0.0674695	7.0081	28.6618	1.38189e-163	1.03291e-162	362.939	XRN2
ENSG00000138795	-0.14705	6.31912	-28.6406	2.28088e-163	1.704e-162	362.499	LEF1
ENSG00000115687	-0.149128	4.50241	-28.6371	2.47417e-163	1.84745e-162	362.514	PASK
ENSG00000165632	-0.0775177	3.46044	-28.6254	3.2589e-163	2.43215e-162	362.279	TAF3
ENSG00000131797	-0.156229	4.57198	-28.6245	3.3267e-163	2.48146e-162	362.217	CLUHP3
ENSG00000115145	0.0672861	5.75809	28.6218	3.54746e-163	2.64477e-162	361.99	STAM2
ENSG00000050426	-0.0569925	5.05978	-28.6153	4.13113e-163	3.07833e-162	361.915	LETMD1
ENSG00000175265	-0.141112	6.00768	-28.6143	4.23634e-163	3.1551e-162	361.882	GOLGA8A
ENSG00000182149	0.0511807	7.29102	28.6101	4.66962e-163	3.47601e-162	361.725	IST1
ENSG00000186017	-0.13358	2.892	-28.61	4.68092e-163	3.48262e-162	361.945	ZNF566
ENSG00000164088	0.0706762	5.99006	28.6074	4.9811e-163	3.70406e-162	361.649	PPM1M
ENSG00000096968	0.0931315	7.33485	28.6054	5.21458e-163	3.87568e-162	361.627	JAK2
ENSG00000198453	-0.117073	3.14333	-28.5989	6.08499e-163	4.52028e-162	361.679	ZNF568
ENSG00000259673	-0.120659	2.53111	-28.5918	7.1872e-163	5.33632e-162	361.514	IQCH-AS1
ENSG00000094880	-0.0707447	4.46806	-28.5871	8.01589e-163	5.94855e-162	361.305	CDC23
ENSG00000226791	-0.152983	1.70799	-28.5782	9.8828e-163	7.33021e-162	361.115
ENSG00000183918	-0.189014	4.62423	-28.5732	1.11144e-162	8.2395e-162	361.016	SH2D1A
ENSG00000116209	0.0744602	6.72117	28.5727	1.12623e-162	8.34487e-162	360.842	TMEM59
ENSG00000111885	0.113936	6.63151	28.5639	1.38476e-162	1.02552e-161	360.641	MAN1A1
ENSG00000108244	0.219553	5.88906	28.5599	1.52205e-162	1.12661e-161	360.557	KRT23
ENSG00000078070	-0.0679443	3.98835	-28.5554	1.68979e-162	1.25014e-161	360.596	MCCC1
ENSG00000105993	0.0660558	6.55313	28.5551	1.70389e-162	1.25992e-161	360.423	DNAJB6
ENSG00000102743	-0.101041	2.91655	-28.5397	2.44254e-162	1.80518e-161	360.296	SLC25A15
ENSG00000107937	-0.074907	4.64612	-28.5344	2.76738e-162	2.04422e-161	360.057	GTPBP4
ENSG00000198040	-0.119599	4.92796	-28.5333	2.83943e-162	2.09637e-161	360.032	ZNF84
ENSG00000068654	-0.099155	4.36408	-28.5242	3.5203e-162	2.59773e-161	359.849	POLR1A
ENSG00000141279	0.0933361	6.54917	28.5229	3.62262e-162	2.67187e-161	359.674	NPEPPS
ENSG00000173890	0.127225	4.0197	28.5226	3.65524e-162	2.69455e-161	359.712	GPR160
ENSG00000206190	-0.128476	5.092	-28.5183	4.03718e-162	2.97459e-161	359.677	ATP10A
ENSG00000181754	-0.159177	3.12725	-28.5181	4.05848e-162	2.98876e-161	359.79	AMIGO1
ENSG00000184675	-0.102182	3.10286	-28.5172	4.14758e-162	3.05282e-161	359.764	AMER1
ENSG00000188897	0.205876	5.1776	28.5104	4.8621e-162	3.57692e-161	359.4
ENSG00000100478	-0.080923	3.65485	-28.5089	5.0352e-162	3.70238e-161	359.537	AP4S1
ENSG00000180573	0.0974402	7.61184	28.507	5.26889e-162	3.87224e-161	359.324	HIST1H2AC
ENSG00000114062	-0.0608371	6.64788	-28.5043	5.61214e-162	4.12242e-161	359.252	UBE3A
ENSG00000122435	-0.122989	4.06125	-28.5025	5.85366e-162	4.29764e-161	359.373	TRMT13
ENSG00000137501	-0.179276	5.74022	-28.4959	6.83347e-162	5.01445e-161	359.13	SYTL2
ENSG00000089022	-0.0541228	5.24921	-28.4923	7.44594e-162	5.46111e-161	359.016	MAPKAPK5
ENSG00000172354	0.13389	6.38138	28.4841	9.0107e-162	6.60541e-161	358.777	GNB2
ENSG00000089693	0.0913856	4.91679	28.4736	1.15387e-161	8.45428e-161	358.529	MLF2
ENSG00000021574	0.0755063	5.5865	28.4731	1.1665e-161	8.54253e-161	358.504	SPAST
ENSG00000283839	0.115201	2.91901	28.4705	1.24027e-161	9.07812e-161	358.56	NA
ENSG00000013364	0.103406	7.44222	28.4598	1.59445e-161	1.16646e-160	358.217	MVP
ENSG00000144848	0.0857077	5.84507	28.4527	1.88377e-161	1.37743e-160	358.023	ATG3
ENSG00000033627	0.09622	5.0391	28.4506	1.97756e-161	1.44528e-160	357.984	ATP6V0A1
ENSG00000139428	-0.124144	2.35513	-28.4387	2.61595e-161	1.91087e-160	357.921	MMAB
ENSG00000143436	-0.102189	3.38738	-28.4379	2.66398e-161	1.94497e-160	357.896	MRPL9
ENSG00000198093	-0.0902566	4.17338	-28.4354	2.82291e-161	2.05997e-160	357.781	ZNF649
ENSG00000034693	-0.116595	3.33184	-28.433	2.98485e-161	2.17704e-160	357.787	PEX3
ENSG00000013375	-0.0856512	4.19924	-28.4318	3.07616e-161	2.24251e-160	357.691	PGM3
ENSG00000169087	0.0837829	5.07703	28.4268	3.45679e-161	2.51872e-160	357.426	HSPBAP1
ENSG00000172932	0.0937279	5.95352	28.4246	3.63782e-161	2.64929e-160	357.371	ANKRD13D
ENSG00000170915	-0.0923655	4.37765	-28.4229	3.78607e-161	2.75586e-160	357.476	PAQR8
ENSG00000162819	0.0739123	6.24132	28.4194	4.10473e-161	2.98631e-160	357.246	BROX
ENSG00000164823	0.114675	5.54008	28.4122	4.86852e-161	3.5402e-160	357.08	OSGIN2
ENSG00000184903	-0.135739	2.38691	-28.4097	5.15312e-161	3.74528e-160	357.244	IMMP2L
ENSG00000149292	-0.127673	3.73091	-28.4058	5.6511e-161	4.10514e-160	357.134	TTC12
ENSG00000134262	-0.0531554	4.88819	-28.4032	6.00149e-161	4.35748e-160	356.953	AP4B1
ENSG00000184602	0.113092	6.85746	28.4011	6.30221e-161	4.57353e-160	356.832	SNN
ENSG00000188092	-0.097184	4.32412	-28.396	7.11046e-161	5.15749e-160	356.849	GPR89B
ENSG00000130724	0.105593	5.43248	28.3775	1.09659e-160	7.95003e-160	356.269	CHMP2A
ENSG00000159063	-0.0710893	3.81702	-28.3755	1.14765e-160	8.31603e-160	356.4	ALG8
ENSG00000155265	-0.165401	2.86837	-28.3739	1.19104e-160	8.62612e-160	356.418	GOLGA7B
ENSG00000196693	-0.0916979	5.52587	-28.3684	1.35605e-160	9.81625e-160	356.123	ZNF33B
ENSG00000181778	0.155456	1.15196	28.3615	1.59275e-160	1.15239e-159	356.097	TMEM252
[truncated: 12,458 more rows]

## Sheet: RNAseq_PLR
e-Table 3: RNA-seq analysis of PLR
ensemble	logFC	AveExpr	t	P.Value	adj.P.Val	B	symbol
ENSG00000118922	-0.00286927	7.01998	-43.2446	0	0	746.557	KLF12
ENSG00000111371	-0.00220193	8.20621	-41.1551	7.91214e-306	5.7185e-302	686.807	SLC38A1
ENSG00000069493	-0.00269124	7.51868	-40.52	4.98823e-298	2.4035e-294	668.829	CLEC2D
ENSG00000170989	-0.00264361	6.93123	-40.4316	6.03446e-297	2.1807e-293	666.325	S1PR1
ENSG00000107679	-0.00277582	5.92299	-40.0297	4.86725e-292	1.40712e-288	655.059	PLEKHA1
ENSG00000147138	-0.00324031	6.21859	-39.3951	2.48858e-284	5.99539e-281	637.308	GPR174
ENSG00000085788	-0.00216087	5.3486	-39.1987	5.893e-282	1.21691e-278	631.874	DDHD2
ENSG00000118855	0.0020419	6.49927	38.765	9.97275e-277	1.80195e-273	619.776	MFSD1
ENSG00000127334	-0.00219373	7.25418	-38.6277	4.44685e-275	7.14214e-272	615.993	DYRK2
ENSG00000224078	-0.00272705	7.30373	-38.5546	3.35593e-274	4.851e-271	613.98	SNHG14
ENSG00000115365	-0.0022218	4.96763	-38.3118	2.71958e-271	3.57377e-268	607.377	LANCL1
ENSG00000172575	-0.00265986	6.33134	-38.0561	3.08589e-268	3.71721e-265	600.25	RASGRP1
ENSG00000161405	-0.00281946	7.25136	-37.9522	5.34993e-267	5.94871e-264	597.396	IKZF3
ENSG00000122224	-0.00278421	5.08215	-37.9162	1.43594e-266	1.48261e-263	596.504	LY9
ENSG00000180096	-0.00235174	5.30932	-37.8837	3.50001e-266	3.37285e-263	595.583	2025-09-01
ENSG00000204116	-0.00309812	4.01638	-37.8161	2.22609e-265	2.01113e-262	593.948	CHIC1
ENSG00000211772	-0.00282567	7.16005	-37.6794	9.39415e-264	7.98779e-261	589.935	TRBC2
ENSG00000120910	-0.00253276	5.16455	-37.6485	2.18577e-263	1.7553e-260	589.16	PPP3CC
ENSG00000145375	-0.00233124	4.77715	-37.5209	7.13147e-262	5.42555e-259	585.724	SPATA5
ENSG00000105176	-0.00196903	5.45714	-37.444	5.81983e-261	4.20628e-258	583.542	URI1
ENSG00000064601	0.00278796	5.82423	37.2139	3.05999e-258	2.1063e-255	577.22	CTSA
ENSG00000196405	-0.00207677	7.50987	-37.0427	3.20189e-256	2.10379e-253	572.603	EVL
ENSG00000113648	0.00190101	8.36322	37.0245	5.25234e-256	3.30098e-253	572.197	H2AFY
ENSG00000153283	-0.00260426	6.66278	-36.9254	7.7044e-255	4.6403e-252	569.41	CD96
ENSG00000127152	-0.00269578	6.86694	-36.8592	4.62912e-254	2.67656e-251	567.62	BCL11B
ENSG00000168421	-0.00248129	5.84426	-36.7439	1.04825e-252	5.82789e-250	564.523	RHOH
ENSG00000082512	-0.00259267	5.95703	-36.7423	1.09453e-252	5.85978e-250	564.477	TRAF5
ENSG00000066933	-0.00166019	6.13715	-36.305	1.44131e-247	7.44075e-245	552.666	MYO9A
ENSG00000119285	-0.00176736	6.06431	-36.2699	3.69516e-247	1.84185e-244	551.729	HEATR1
ENSG00000182866	-0.0022874	6.85243	-36.1577	7.51525e-246	3.6211e-243	548.725	LCK
ENSG00000245164	-0.00299482	6.58059	-35.9875	7.18584e-244	3.35069e-241	544.173	LINC00861
ENSG00000111615	-0.0021416	5.12987	-35.9383	2.68212e-243	1.21156e-240	542.932	KRR1
ENSG00000113263	-0.00246915	7.60181	-35.9073	6.1496e-243	2.69371e-240	542.029	ITK
ENSG00000134954	-0.00199331	8.6222	-35.7699	2.41213e-241	1.02551e-238	538.411	ETS1
ENSG00000125952	0.00178436	6.74239	35.7485	4.27151e-241	1.76414e-238	537.774	MAX
ENSG00000156642	0.00220328	5.87934	35.7123	1.12055e-240	4.49931e-238	536.788	NPTN
ENSG00000069667	-0.00297954	7.59115	-35.6649	3.96573e-240	1.54931e-237	535.571	RORA
ENSG00000122188	-0.0029324	4.39359	-35.603	2.06688e-239	7.86228e-237	534.103	LAX1
ENSG00000089775	-0.00234574	5.73887	-35.545	9.65804e-239	3.57967e-236	532.39	ZBTB25
ENSG00000118508	0.00274689	4.64326	35.5374	1.18336e-238	4.27636e-236	532.172	RAB32
ENSG00000115419	-0.00149351	7.23762	-35.5275	1.53903e-238	5.42603e-236	531.893	GLS
ENSG00000167984	-0.00221842	6.15597	-35.4966	3.49767e-238	1.20378e-235	531.078	NLRC3
ENSG00000177034	-0.00253498	4.43805	-35.4417	1.50493e-237	5.05903e-235	529.805	MTX3
ENSG00000072858	-0.00234358	5.0626	-35.3272	3.15072e-236	1.03508e-233	526.662	SIDT1
ENSG00000069275	-0.00167042	6.62849	-35.3041	5.80396e-236	1.86436e-233	525.953	NUCKS1
ENSG00000196305	-0.00164978	6.13308	-35.295	7.38889e-236	2.32188e-233	525.717	IARS
ENSG00000198707	-0.00241466	4.95578	-35.2074	7.5276e-235	2.31514e-232	523.516	CEP290
ENSG00000164323	-0.00220606	5.26702	-35.1008	1.2645e-233	3.80798e-231	520.656	CFAP97
ENSG00000182670	-0.00180699	7.21859	-35.0721	2.69503e-233	7.95035e-231	519.824	TTC3
ENSG00000165929	-0.0027901	7.17702	-34.9532	6.23473e-232	1.80246e-229	516.697	TC2N
ENSG00000130024	-0.00207085	5.24933	-34.9478	7.17747e-232	2.03432e-229	516.614	PHF10
ENSG00000083720	-0.0023768	4.4561	-34.8504	9.37413e-231	2.60583e-228	514.161	OXCT1
ENSG00000115085	-0.00237554	6.41747	-34.7926	4.28481e-230	1.16862e-227	512.484	ZAP70
ENSG00000257093	-0.00200401	6.61618	-34.7746	6.88911e-230	1.84411e-227	511.977	KIAA1147
ENSG00000198780	-0.00362115	4.03517	-34.771	7.56553e-230	1.98836e-227	512.185	FAM169A
ENSG00000259330	0.00262256	4.89675	34.6791	8.47548e-229	2.18773e-226	509.476	INAFM2
ENSG00000036549	-0.00169791	5.73406	-34.6126	4.87021e-228	1.23507e-225	507.745	ZZZ3
ENSG00000256235	0.00299394	3.35196	34.608	5.4906e-228	1.36839e-225	507.779	SMIM3
ENSG00000132300	-0.00158603	6.18775	-34.5594	1.96554e-227	4.81557e-225	506.326	PTCD3
ENSG00000111530	-0.00128907	6.70869	-34.5478	2.66596e-227	6.42275e-225	506.015	CAND1
ENSG00000162739	-0.00269972	5.54284	-34.4956	1.0477e-226	2.48271e-224	504.706	SLAMF6
ENSG00000132953	-0.00159282	5.72147	-34.4853	1.37023e-226	3.19462e-224	504.406	XPO4
ENSG00000154473	-0.00151492	6.18597	-34.4422	4.23833e-226	9.72461e-224	503.255	BUB3
ENSG00000124203	-0.0025025	5.71823	-34.3453	5.35759e-225	1.21006e-222	500.759	ZNF831
ENSG00000174373	-0.00160829	6.50972	-34.2506	6.35501e-224	1.41326e-221	498.247	RALGAPA1
ENSG00000135905	-0.00169718	7.93714	-34.2067	1.99903e-223	4.37817e-221	497.138	DOCK10
ENSG00000096433	-0.00266869	4.92357	-34.1701	5.192e-223	1.12015e-220	496.276	ITPR3
ENSG00000145907	-0.0011251	7.29115	-34.1675	5.54838e-223	1.17944e-220	496.09	G3BP1
ENSG00000117020	-0.0024114	5.97247	-34.1415	1.0931e-222	2.28997e-220	495.431	AKT3
ENSG00000198286	-0.00217404	5.22911	-34.1401	1.13391e-222	2.34152e-220	495.449	CARD11
ENSG00000112159	-0.00179572	6.81196	-34.1269	1.5986e-222	3.25461e-220	495.023	MDN1
ENSG00000122435	-0.00249658	4.06136	-34.0872	4.4968e-222	9.02795e-220	494.257	TRMT13
ENSG00000015171	-0.0017525	5.31506	-34.0415	1.47853e-221	2.9277e-219	492.861	ZMYND11
ENSG00000081386	-0.00212052	5.09359	-34.0364	1.69129e-221	3.30372e-219	492.761	ZNF510
ENSG00000196911	-0.00220533	4.95945	-34.025	2.27386e-221	4.38248e-219	492.489	KPNA5
ENSG00000204427	0.00186693	5.34351	33.9743	8.49184e-221	1.61246e-218	491.049	ABHD16A
ENSG00000155561	-0.00147208	6.20715	-33.9739	8.5894e-221	1.61246e-218	491.04	NUP205
ENSG00000185129	-0.00192794	6.12015	-33.9301	2.67999e-220	4.96656e-218	489.923	PURA
ENSG00000110880	0.00268516	6.72976	33.895	6.66895e-220	1.22025e-217	489.014	CORO1C
ENSG00000176225	-0.00189625	5.33613	-33.8727	1.18785e-219	2.1463e-217	488.475	RTTN
ENSG00000135749	-0.00257255	5.47557	-33.79	1.0173e-218	1.81544e-216	486.332	PCNX2
ENSG00000166333	0.00185565	5.56882	33.7566	2.41168e-218	4.25132e-216	485.395	ILK
ENSG00000141293	-0.00285736	3.91852	-33.7491	2.92957e-218	5.10204e-216	485.521	SKAP1
ENSG00000124181	-0.00220593	6.40016	-33.736	4.11763e-218	7.08576e-216	484.887	PLCG1
ENSG00000153107	-0.00157454	5.90177	-33.6131	9.89988e-217	1.68356e-214	481.705	ANAPC1
ENSG00000027075	-0.00207207	7.42101	-33.5816	2.23265e-216	3.75266e-214	480.899	PRKCH
ENSG00000088387	-0.00243676	6.03456	-33.4526	6.24546e-215	1.03768e-212	477.58	DOCK9
ENSG00000277734	-0.00265847	7.18636	-33.4458	7.43377e-215	1.22108e-212	477.395	TRAC
ENSG00000138378	-0.00258056	6.18346	-33.3863	3.44302e-214	5.59201e-212	475.869	STAT4
ENSG00000101856	0.00320203	4.85265	33.3723	4.93908e-214	7.93271e-212	475.507	PGRMC1
ENSG00000153933	-0.00243954	4.67618	-33.223	2.29815e-212	3.65052e-210	471.809	DGKE
ENSG00000175471	0.00263405	6.14957	33.1787	7.17715e-212	1.12767e-209	470.508	MCTP1
ENSG00000164180	-0.00187036	5.29765	-33.1435	1.76945e-211	2.75026e-209	469.68	TMEM161B
ENSG00000105866	-0.00161265	5.89255	-33.1323	2.35892e-211	3.62747e-209	469.336	SP4
ENSG00000139737	-0.00219413	4.07647	-33.1288	2.57682e-211	3.92084e-209	469.487	SLAIN1
ENSG00000173208	-0.00304574	5.27215	-33.1072	4.4929e-211	6.76509e-209	468.786	ABCD2
ENSG00000118058	-0.00164168	7.27433	-33.0929	6.47545e-211	9.64975e-209	468.322	KMT2A
ENSG00000111644	0.00320358	2.19457	33.0889	7.17709e-211	1.05862e-208	468.596	ACRBP
ENSG00000120800	-0.00197796	4.90075	-33.0344	2.9009e-210	4.2356e-208	466.927	UTP20
ENSG00000074696	-0.00200478	4.27555	-33.0318	3.0989e-210	4.47945e-208	466.96	HACD3
ENSG00000198909	0.00211987	6.39481	33.031	3.15848e-210	4.52038e-208	466.727	MAP3K3
ENSG00000140022	0.00414836	4.01637	32.9576	2.07038e-209	2.93405e-207	464.943	STON2
ENSG00000174501	-0.00242415	6.69269	-32.957	2.10127e-209	2.94893e-207	464.847	ANKRD36C
ENSG00000164134	-0.00165054	5.69715	-32.8578	2.65173e-208	3.68565e-206	462.331	NAA15
ENSG00000152795	-0.00137685	6.94297	-32.8185	7.2251e-208	9.94655e-206	461.301	HNRNPDL
ENSG00000013725	-0.0027309	5.19928	-32.8141	8.08538e-208	1.10259e-205	461.29	CD6
ENSG00000259834	-0.00275952	5.10774	-32.7891	1.53118e-207	2.06853e-205	460.673
ENSG00000180354	0.00295761	6.40752	32.716	9.86689e-207	1.32061e-204	458.697	MTURN
ENSG00000059377	0.00285716	7.47448	32.6932	1.76284e-206	2.33778e-204	458.172	TBXAS1
ENSG00000142065	-0.00206179	4.58762	-32.6123	1.38029e-205	1.81382e-203	456.213	ZFP14
ENSG00000175054	-0.00150608	6.91256	-32.6071	1.57748e-205	2.05428e-203	455.918	ATR
ENSG00000127995	-0.00215894	4.75856	-32.5378	9.16679e-205	1.18309e-202	454.307	CASD1
ENSG00000187446	0.00226145	5.2194	32.5164	1.57923e-204	2.02016e-202	453.613	CHP1
ENSG00000119401	-0.00239619	3.61581	-32.5026	2.24089e-204	2.84141e-202	453.629	TRIM32
ENSG00000172673	-0.00338902	6.09583	-32.4994	2.43242e-204	3.05156e-202	453.229	THEMIS
ENSG00000198040	-0.00233789	4.92831	-32.4991	2.44885e-204	3.05156e-202	453.301	ZNF84
ENSG00000056558	-0.00254082	5.29169	-32.483	3.68017e-204	4.54674e-202	452.852	TRAF1
ENSG00000213402	-0.00233522	5.04796	-32.4689	5.26256e-204	6.44664e-202	452.533	PTPRCAP
ENSG00000188042	-0.00223228	6.93776	-32.4527	7.94997e-204	9.65687e-202	452.008	ARL4C
ENSG00000100330	0.0024842	7.34054	32.4318	1.35122e-203	1.62765e-201	451.522	MTMR3
ENSG00000170946	-0.00204409	4.00721	-32.422	1.73166e-203	2.06869e-201	451.486	DNAJC24
ENSG00000015133	-0.00152292	6.72154	-32.4215	1.75126e-203	2.07496e-201	451.216	CCDC88C
ENSG00000116984	-0.00148887	6.53392	-32.4131	2.16651e-203	2.54609e-201	450.992	MTR
ENSG00000123066	0.00163193	8.48154	32.4116	2.25374e-203	2.62724e-201	451.08	MED13L
ENSG00000160014	0.00189671	5.67503	32.3758	5.5711e-203	6.44243e-201	450.044	CALM3
ENSG00000163104	-0.00171531	5.01049	-32.3607	8.18115e-203	9.3856e-201	449.767	SMARCAD1
ENSG00000135976	-0.00255302	6.88846	-32.3579	8.78486e-203	9.99883e-201	449.612	ANKRD36
ENSG00000146376	0.00229988	4.84076	32.35	1.07261e-202	1.2113e-200	449.418	ARHGAP18
ENSG00000168028	-0.00214209	8.43826	-32.3471	1.1519e-202	1.29076e-200	449.398	RPSA
ENSG00000122484	-0.0018715	5.31764	-32.3462	1.18046e-202	1.31258e-200	449.367	RPAP2
ENSG00000151835	-0.00225075	6.4507	-32.3259	1.97185e-202	2.17581e-200	448.811	SACS
ENSG00000168813	-0.00161833	5.54781	-32.3196	2.31104e-202	2.53077e-200	448.667	ZNF507
ENSG00000149357	0.00187778	5.86989	32.3063	3.23985e-202	3.52121e-200	448.281	LAMTOR1
ENSG00000128915	-0.00154734	5.68284	-32.3022	3.58844e-202	3.87097e-200	448.22	ICE2
ENSG00000117174	-0.00218531	3.96372	-32.2743	7.2651e-202	7.77904e-200	447.767	ZNHIT6
ENSG00000033867	-0.00218693	6.22628	-32.2311	2.16588e-201	2.30205e-199	446.414	SLC4A7
ENSG00000134759	-0.00162661	5.82375	-32.2194	2.90904e-201	3.06935e-199	446.12	ELP2
ENSG00000095303	0.00409462	5.35794	32.2185	2.97971e-201	3.12114e-199	446.088	PTGS1
ENSG00000173200	-0.00277488	5.52841	-32.2	4.748e-201	4.93758e-199	445.672	PARP15
ENSG00000198105	-0.00229981	4.02924	-32.1928	5.70557e-201	5.891e-199	445.697	ZNF248
ENSG00000146414	-0.00149904	6.54969	-32.1897	6.16084e-201	6.31596e-199	445.349	SHPRH
ENSG00000196782	0.00258095	4.4896	32.186	6.77354e-201	6.89518e-199	445.298	MAML3
ENSG00000138449	0.00329359	7.01128	32.1751	8.91656e-201	9.01321e-199	445.025	SLC40A1
ENSG00000120594	0.00304282	7.47613	32.1427	2.01829e-200	2.026e-198	444.234	PLXDC2
ENSG00000124762	0.00319238	3.09205	32.1421	2.04941e-200	2.04305e-198	444.38	CDKN1A
ENSG00000085511	-0.00155282	5.57737	-32.1384	2.24695e-200	2.22463e-198	444.088	MAP3K4
ENSG00000168283	-0.00202417	5.06586	-32.1106	4.52935e-200	4.45386e-198	443.46	BMI1
ENSG00000135622	-0.00271676	2.8364	-32.0845	8.75063e-200	8.54664e-198	443.268	SEMA4F
ENSG00000160654	-0.0030898	5.1333	-32.078	1.03068e-199	9.99895e-198	442.652	CD3G
ENSG00000186350	0.00275264	7.13416	32.0581	1.70204e-199	1.6402e-197	442.081	RXRA
ENSG00000107779	-0.0031524	3.31327	-32.0505	2.06082e-199	1.97279e-197	442.297	BMPR1A
ENSG00000174738	-0.00200037	5.52733	-32.045	2.3656e-199	2.24966e-197	441.759	NR1D2
ENSG00000145734	-0.00138806	6.83186	-32.0313	3.34344e-199	3.15879e-197	441.359	BDP1
ENSG00000107738	0.0030144	8.52592	32.0188	4.57656e-199	4.29572e-197	441.189	C10orf54
ENSG00000088179	-0.00191679	7.34966	-32.001	7.16362e-199	6.68065e-197	440.613	PTPN4
ENSG00000101096	-0.00242228	5.43999	-31.9638	1.82468e-198	1.69075e-196	439.722	NFATC2
ENSG00000172175	-0.00143721	6.738	-31.9553	2.25727e-198	2.07827e-196	439.452	MALT1
ENSG00000101162	0.00541356	7.29242	31.8841	1.35233e-197	1.23721e-195	437.752	TUBB1
ENSG00000151612	-0.00319262	3.27825	-31.8782	1.56729e-197	1.42485e-195	437.98	ZNF827
ENSG00000153815	0.00205763	4.58639	31.8768	1.62314e-197	1.4664e-195	437.525	CMIP
ENSG00000108506	-0.00163998	4.38579	-31.8648	2.19426e-197	1.97007e-195	437.356	INTS2
ENSG00000135709	0.00256921	6.64428	31.8634	2.27083e-197	2.02623e-195	437.158	KIAA0513
ENSG00000185340	0.00345653	1.47131	31.7969	1.20478e-196	1.06841e-194	435.978	GAS2L1
ENSG00000143376	0.00210232	6.07431	31.7627	2.84138e-196	2.5044e-194	434.611	SNX27
ENSG00000073849	-0.00163522	6.82727	-31.696	1.50753e-195	1.32069e-193	432.951	ST6GAL1
ENSG00000173258	-0.00310184	4.2576	-31.6816	2.16392e-195	1.88431e-193	432.848	ZNF483
ENSG00000197969	-0.00169408	6.91258	-31.6707	2.83972e-195	2.45797e-193	432.322	VPS13A
ENSG00000138138	-0.00145897	5.18185	-31.669	2.95918e-195	2.54613e-193	432.348	ATAD1
ENSG00000167286	-0.00367575	4.81023	-31.6616	3.56399e-195	3.04837e-193	432.265	CD3D
ENSG00000161911	0.00511938	2.70666	31.6573	3.9725e-195	3.37779e-193	432.251	TREML1
ENSG00000247774	-0.0024712	5.44563	-31.6419	5.82759e-195	4.92618e-193	431.664	PCED1B-AS1
ENSG00000247708	-0.0025766	3.61564	-31.6369	6.61496e-195	5.55926e-193	431.842	STX18-AS1
ENSG00000149311	-0.00126361	9.59483	-31.5846	2.44012e-194	2.03884e-192	430.325	ATM
ENSG00000176783	0.00212655	5.88596	31.5145	1.40543e-193	1.16756e-191	428.408	RUFY1
ENSG00000196950	-0.00193105	5.50271	-31.4992	2.05704e-193	1.69911e-191	428.092	SLC39A10
ENSG00000138434	0.00185949	6.81412	31.4923	2.44103e-193	2.00484e-191	427.882	SSFA2
ENSG00000152409	-0.00203193	4.666	-31.4483	7.30779e-193	5.96803e-191	426.923	JMY
ENSG00000079134	-0.00174421	4.85762	-31.4464	7.65441e-193	6.20198e-191	426.841	THOC1
ENSG00000135414	-0.00281208	3.5081	-31.4463	7.68007e-193	6.20198e-191	427.124	GDF11
ENSG00000171817	-0.00321581	3.13781	-31.4437	8.18964e-193	6.57674e-191	427.16	ZNF540
ENSG00000143761	0.00227351	7.17169	31.4399	9.0144e-193	7.19907e-191	426.606	ARF1
ENSG00000173327	0.00192768	5.54125	31.4236	1.35227e-192	1.07401e-190	426.158	MAP3K11
ENSG00000109680	-0.00330734	3.21664	-31.4105	1.87252e-192	1.47909e-190	426.312	TBC1D19
ENSG00000198393	-0.00182624	5.01943	-31.4071	2.04041e-192	1.60294e-190	425.838	ZNF26
ENSG00000245937	-0.00235385	4.8329	-31.3611	6.40548e-192	5.00493e-190	424.738	LINC01184
ENSG00000162613	-0.00125784	7.10704	-31.3395	1.09402e-191	8.50217e-190	424.075	FUBP1
ENSG00000115875	-0.00144182	6.47245	-31.3107	2.24219e-191	1.7332e-189	423.351	SRSF7
ENSG00000198301	-0.00152109	5.05726	-31.3014	2.82343e-191	2.17089e-189	423.204	SDAD1
ENSG00000115827	-0.00164596	4.48934	-31.2858	4.1535e-191	3.17666e-189	422.897	DCAF17
ENSG00000141040	-0.00291108	3.04355	-31.2584	8.21272e-191	6.24815e-189	422.569	ZNF287
ENSG00000140262	-0.00116548	5.9314	-31.2566	8.59379e-191	6.50383e-189	422.011	TCF12
ENSG00000138078	-0.00150284	5.26318	-31.2474	1.07966e-190	8.12836e-189	421.84	PREPL
ENSG00000107372	0.00144175	7.37404	31.2462	1.11068e-190	8.31856e-189	421.794	ZFAND5
ENSG00000204386	0.00180923	4.83563	31.2135	2.49943e-190	1.86234e-188	420.965	NEU1
ENSG00000135926	0.00198922	6.84542	31.1941	4.04719e-190	3.00011e-188	420.479	TMBIM1
ENSG00000183918	-0.00362709	4.62432	-31.1935	4.10389e-190	3.02662e-188	420.647	SH2D1A
ENSG00000081307	-0.00192185	4.45089	-31.1684	7.64379e-190	5.60868e-188	420.006	UBA5
ENSG00000188559	0.00210727	7.25294	31.1378	1.63297e-189	1.19215e-187	419.107	RALGAPA2
ENSG00000162894	-0.00297314	4.94688	-31.1353	1.73506e-189	1.26031e-187	419.141	FCMR
ENSG00000152495	-0.00308952	6.79054	-31.1304	1.95996e-189	1.41656e-187	418.913	CAMK4
ENSG00000092439	-0.00108348	6.74919	-31.1219	2.42044e-189	1.74067e-187	418.669	TRPM7
ENSG00000232931	-0.00250184	5.58002	-31.1204	2.51095e-189	1.79682e-187	418.691	LINC00342
ENSG00000135108	-0.00152185	4.98121	-31.1121	3.0824e-189	2.19488e-187	418.52	FBXO21
ENSG00000035403	0.00267404	7.55923	31.0779	7.18655e-189	5.09223e-187	417.658	VCL
ENSG00000198589	-0.00153073	7.962	-31.0319	2.24006e-188	1.57952e-186	416.49	LRBA
ENSG00000114374	-0.00241501	1.3537	-31.0142	3.46961e-188	2.43462e-186	416.32	USP9Y
ENSG00000101224	-0.00246577	4.56377	-31.0016	4.74441e-188	3.31307e-186	415.876	CDC25B
ENSG00000184602	0.00281476	6.85742	30.9679	1.08887e-187	7.5671e-186	414.898	SNN
ENSG00000148719	0.00163021	5.28351	30.9643	1.19068e-187	8.23503e-186	414.778	DNAJB12
ENSG00000166260	-0.00192876	4.54856	-30.9636	1.21034e-187	8.33114e-186	414.929	COX11
ENSG00000107742	-0.00206529	6.75628	-30.9307	2.72495e-187	1.86678e-185	413.97	SPOCK2
ENSG00000033327	0.00321566	6.18426	30.8939	6.76496e-187	4.61262e-185	413.05	GAB2
ENSG00000101493	0.00279862	6.54875	30.8873	7.94836e-187	5.39406e-185	412.895	ZNF516
ENSG00000163281	-0.00231322	3.37092	-30.885	8.41038e-187	5.68094e-185	413.235	GNPDA2
ENSG00000151623	-0.00314131	4.86201	-30.8767	1.03354e-186	6.94876e-185	412.781	NR3C2
ENSG00000187607	-0.00239149	3.90741	-30.845	2.25326e-186	1.50791e-184	412.141	ZNF286A
ENSG00000274536	0.00281098	8.91497	30.8233	3.8495e-186	2.56426e-184	411.481	MIR223
ENSG00000133818	-0.0037287	3.45514	-30.8175	4.43702e-186	2.94207e-184	411.592	RRAS2
ENSG00000068323	0.00249828	5.32369	30.8043	6.13633e-186	4.05026e-184	410.839	TFE3
ENSG00000186020	-0.00214045	3.97235	-30.7766	1.21405e-185	7.97688e-184	410.436	ZNF529
ENSG00000185246	-0.00175135	4.77609	-30.7395	3.01981e-185	1.97517e-183	409.376	PRPF39
ENSG00000074935	-0.00244636	3.52044	-30.7307	3.74871e-185	2.44088e-183	409.416	TUBE1
ENSG00000112996	-0.00157405	5.14172	-30.726	4.20829e-185	2.72784e-183	408.996	MRPS30
ENSG00000047648	0.00389093	2.26094	30.7223	4.61249e-185	2.9765e-183	409.193	ARHGAP6
ENSG00000059573	-0.0020689	3.77364	-30.7159	5.39557e-185	3.46636e-183	408.987	ALDH18A1
ENSG00000101160	0.0018935	7.50888	30.6934	9.38142e-185	6.00037e-183	408.172	CTSZ
ENSG00000153162	0.00382791	2.68994	30.6874	1.08604e-184	6.91572e-183	408.258	BMP6
ENSG00000113140	0.00517028	4.69775	30.6678	1.75814e-184	1.11464e-182	407.539	SPARC
ENSG00000168685	-0.00269923	9.27918	-30.652	2.59243e-184	1.6364e-182	407.212	IL7R
ENSG00000163393	0.00298201	5.4486	30.6424	3.27634e-184	2.05911e-182	406.861	SLC22A15
ENSG00000196693	-0.00180845	5.526	-30.6377	3.67672e-184	2.30074e-182	406.799	ZNF33B
ENSG00000169247	0.00438917	1.79795	30.6362	3.81349e-184	2.37604e-182	407.16	SH3TC2
ENSG00000196177	-0.00176825	4.11148	-30.6353	3.89948e-184	2.41918e-182	406.926	ACADSB
ENSG00000214029	-0.00223603	4.57314	-30.6317	4.2587e-184	2.63075e-182	406.776	ZNF891
ENSG00000126226	-0.00173029	5.06398	-30.6175	6.03555e-184	3.7125e-182	406.336	PCID2
ENSG00000156976	-0.00117305	8.11457	-30.5834	1.3934e-183	8.5346e-182	405.474	EIF4A2
ENSG00000165702	0.00360194	2.84462	30.5816	1.45406e-183	8.86854e-182	405.641	GFI1B
ENSG00000152213	0.00248117	5.63179	30.5709	1.89144e-183	1.14877e-181	405.102	ARL11
ENSG00000197746	0.00240159	9.41521	30.5496	3.18486e-183	1.92624e-181	404.802	PSAP
ENSG00000174197	-0.00115024	7.22776	-30.5423	3.80945e-183	2.2944e-181	404.422	MGA
ENSG00000234420	-0.00161998	5.7831	-30.5295	5.20987e-183	3.12484e-181	404.124	ZNF37BP
ENSG00000114062	-0.00112178	6.64777	-30.5221	6.25316e-183	3.7351e-181	403.916	UBE3A
ENSG00000175538	0.00275961	7.03631	30.5216	6.31785e-183	3.75821e-181	403.947	KCNE3
ENSG00000114738	0.00175377	6.65301	30.5173	7.02332e-183	4.16074e-181	403.81	MAPKAPK3
ENSG00000176095	0.00195782	5.43952	30.5149	7.44454e-183	4.39228e-181	403.738	IP6K1
ENSG00000068650	0.0019759	6.38096	30.5015	1.03479e-182	6.08044e-181	403.413	ATP11A
ENSG00000131446	0.00136893	7.18598	30.5009	1.0492e-182	6.14014e-181	403.431	MGAT1
ENSG00000120885	0.00484928	3.84845	30.4921	1.30155e-182	7.58627e-181	403.306	CLU
ENSG00000125245	-0.00335924	2.87936	-30.4859	1.51328e-182	8.78495e-181	403.6	GPR18
ENSG00000076944	0.00228883	5.32748	30.4839	1.58914e-182	9.18841e-181	402.99	STXBP2
ENSG00000023445	-0.00272062	7.47253	-30.4792	1.78597e-182	1.02853e-180	402.902	BIRC3
ENSG00000176463	0.00192182	6.05851	30.4762	1.91866e-182	1.10056e-180	402.786	SLCO3A1
ENSG00000156650	-0.00127292	5.87157	-30.4626	2.67384e-182	1.52768e-180	402.477	KAT6B
ENSG00000154174	-0.0014105	5.25873	-30.4568	3.08213e-182	1.75402e-180	402.387	TOMM70
ENSG00000126759	0.00269286	6.9775	30.4527	3.40654e-182	1.93104e-180	402.263	CFP
ENSG00000116824	-0.00289748	5.55275	-30.4506	3.58903e-182	2.02654e-180	402.239	CD2
ENSG00000106692	-0.00199356	4.63606	-30.4285	6.15351e-182	3.46105e-180	401.789	FKTN
ENSG00000122507	-0.00173459	4.57452	-30.4193	7.71189e-182	4.32075e-180	401.559	BBS9
ENSG00000129158	-0.00196063	3.91931	-30.4108	9.48515e-182	5.29374e-180	401.479	SERGEF
ENSG00000046651	-0.00184185	5.40376	-30.3852	1.77139e-181	9.84824e-180	400.63	OFD1
ENSG00000169704	0.00497222	2.65069	30.375	2.2749e-181	1.25991e-179	400.578	GP9
ENSG00000104154	-0.00315893	2.8488	-30.3672	2.74924e-181	1.5168e-179	400.714	SLC30A4
ENSG00000180573	0.00230759	7.61176	30.3616	3.15257e-181	1.73271e-179	400.071	HIST1H2AC
ENSG00000162777	-0.00166554	6.94382	-30.361	3.20219e-181	1.75332e-179	399.99	DENND2D
ENSG00000211751	-0.00252822	6.65248	-30.3595	3.31982e-181	1.81087e-179	399.972	TRBC1
ENSG00000164163	-0.00176674	5.33017	-30.3572	3.508e-181	1.90632e-179	399.965	ABCE1
ENSG00000051825	-0.00157731	5.44052	-30.3456	4.6575e-181	2.52151e-179	399.656	MPHOSPH9
ENSG00000186260	-0.00223018	3.88982	-30.3259	7.53397e-181	4.06357e-179	399.431	MKL2
ENSG00000169756	0.00233022	6.73788	30.3225	8.18399e-181	4.39775e-179	399.067	LIMS1
ENSG00000113269	0.00242344	7.51373	30.3031	1.31152e-180	7.0215e-179	398.642	RNF130
ENSG00000174175	0.00431368	3.99204	30.2793	2.34164e-180	1.24902e-178	398.094	SELP
ENSG00000118596	-0.00175357	6.02944	-30.2779	2.4239e-180	1.28814e-178	397.986	SLC16A7
ENSG00000173145	-0.00236774	4.20885	-30.2653	3.29579e-180	1.74508e-178	397.896	NOC3L
ENSG00000130429	0.00183922	7.94172	30.2467	5.1837e-180	2.73469e-178	397.29	ARPC1B
ENSG00000055044	-0.00218582	4.83444	-30.2402	6.06969e-180	3.19045e-178	397.178	NOP58
ENSG00000151135	-0.00255173	3.83428	-30.2241	8.97788e-180	4.702e-178	396.978	TMEM263
ENSG00000127824	0.00245133	6.48624	30.2032	1.49421e-179	7.79739e-178	396.156	TUBA4A
ENSG00000142541	-0.00186678	9.49971	-30.197	1.73598e-179	9.02645e-178	396.138	RPL13A
ENSG00000149564	0.00385931	2.0419	30.1875	2.18603e-179	1.13258e-177	396.169	ESAM
ENSG00000066651	-0.00235249	3.50544	-30.1712	3.25498e-179	1.68038e-177	395.751	TRMT11
ENSG00000142875	-0.00213357	6.60233	-30.1496	5.48963e-179	2.82394e-177	394.862	PRKACB
ENSG00000141480	0.00241707	7.43455	30.143	6.44348e-179	3.30286e-177	394.748	ARRB2
ENSG00000110446	0.0023877	5.41068	30.1287	9.13528e-179	4.6661e-177	394.334	SLC15A3
ENSG00000139132	0.00279327	6.19975	30.1266	9.6183e-179	4.89551e-177	394.289	FGD4
ENSG00000138185	0.00263856	7.6126	30.1242	1.01783e-178	5.16237e-177	394.304	ENTPD1
ENSG00000118246	-0.00161874	4.9978	-30.0685	3.93071e-178	1.98666e-176	392.975	FASTKD2
ENSG00000196547	0.00232129	6.80107	30.0607	4.75005e-178	2.3924e-176	392.711	MAN2A2
ENSG00000226950	-0.00221911	4.21795	-30.0521	5.85137e-178	2.93686e-176	392.714	DANCR
ENSG00000198081	-0.00145623	4.86307	-30.0346	8.95258e-178	4.47784e-176	392.161	ZBTB14
ENSG00000135655	0.00189059	9.03919	30.0187	1.31514e-177	6.55528e-176	391.844	USP15
ENSG00000170296	0.00213885	6.67989	30.015	1.43799e-177	7.14301e-176	391.6	GABARAP
ENSG00000135956	0.00194595	5.90515	30.0077	1.71877e-177	8.5085e-176	391.394	TMEM127
ENSG00000070061	-0.00124519	6.13221	-29.984	3.05123e-177	1.50531e-175	390.833	IKBKAP
ENSG00000134987	-0.00135037	5.43529	-29.9627	5.09874e-177	2.50688e-175	390.363	WDR36
ENSG00000112078	0.0015348	7.0327	29.9597	5.48529e-177	2.68779e-175	390.269	KCTD20
ENSG00000187605	0.00177953	6.08711	29.9542	6.27365e-177	3.0637e-175	390.1	TET3
ENSG00000182700	-0.00217576	3.77004	-29.9482	7.25264e-177	3.52986e-175	390.287	IGIP
ENSG00000231074	-0.0016946	6.98501	-29.935	9.97473e-177	4.83841e-175	389.654	HCG18
ENSG00000131437	-0.00235684	3.57842	-29.9324	1.06244e-176	5.13632e-175	389.953	KIF3A
ENSG00000145685	0.00326995	4.2357	29.9317	1.08165e-176	5.21176e-175	389.632	LHFPL2
ENSG00000138095	-0.00137195	6.11756	-29.926	1.24042e-176	5.9569e-175	389.435	LRPPRC
ENSG00000158711	-0.0012029	7.04296	-29.9124	1.72323e-176	8.24812e-175	389.104	ELK4
ENSG00000197324	0.00269528	6.26795	29.8744	4.31976e-176	2.0608e-174	388.189	LRP10
ENSG00000163257	-0.00139537	5.41447	-29.8662	5.26143e-176	2.50177e-174	388.029	DCAF16
ENSG00000078687	-0.0014391	5.29262	-29.8655	5.34901e-176	2.53508e-174	388.022	TNRC6C
ENSG00000168615	0.0021695	4.81337	29.8641	5.53488e-176	2.6146e-174	387.955	ADAM9
ENSG00000123552	-0.00259903	3.51928	-29.8486	8.04561e-176	3.78825e-174	387.947	USP45
ENSG00000163644	-0.0020432	6.17866	-29.8457	8.63487e-176	4.0525e-174	387.511	PPM1K
ENSG00000133030	-0.00139351	6.88626	-29.8383	1.03176e-175	4.82656e-174	387.32	MPRIP
ENSG00000159314	0.00194101	6.58663	29.8353	1.109e-175	5.17118e-174	387.251	ARHGAP27
ENSG00000109323	0.00163276	6.61264	29.8197	1.61725e-175	7.51682e-174	386.867	MANBA
ENSG00000198612	-0.00153067	4.39303	-29.795	2.93524e-175	1.3599e-173	386.444	COPS8
ENSG00000198677	-0.00142589	6.52134	-29.7925	3.11456e-175	1.43419e-173	386.211	TTC37
ENSG00000005249	0.00477146	5.85318	29.7925	3.11544e-175	1.43419e-173	386.233	PRKAR2B
ENSG00000137078	-0.00238526	4.43223	-29.773	4.98686e-175	2.28842e-173	385.942	SIT1
ENSG00000148841	0.00262974	6.637	29.768	5.62484e-175	2.57301e-173	385.634	ITPRIP
ENSG00000196182	0.00242824	5.54923	29.7648	6.07919e-175	2.77207e-173	385.539	STK40
ENSG00000147274	-0.00115173	7.12283	-29.7607	6.70596e-175	3.04826e-173	385.45	RBMX
ENSG00000124177	-0.00128648	6.66111	-29.7557	7.57422e-175	3.43214e-173	385.319	CHD6
ENSG00000092531	0.00205567	7.19358	29.7441	9.99535e-175	4.51509e-173	385.084	SNAP23
ENSG00000138134	-0.00237394	4.49262	-29.7408	1.0845e-174	4.88365e-173	385.149	STAMBPL1
ENSG00000183255	0.00184208	7.08854	29.7378	1.16323e-174	5.22189e-173	384.921	PTTG1IP
ENSG00000128245	0.00192756	4.39733	29.7346	1.25921e-174	5.63528e-173	384.874	YWHAH
ENSG00000177272	-0.00221545	5.05779	-29.731	1.37327e-174	6.10896e-173	384.829	KCNA3
ENSG00000136279	0.00138697	8.09492	29.7309	1.37351e-174	6.10896e-173	384.815	DBNL
ENSG00000145041	-0.00132089	5.09375	-29.7275	1.49364e-174	6.62289e-173	384.71	DCAF1
ENSG00000168944	-0.00102194	6.13254	-29.7244	1.60755e-174	7.10617e-173	384.569	CEP120
ENSG00000255717	-0.00202024	5.34893	-29.7238	1.63291e-174	7.19624e-173	384.618	SNHG1
ENSG00000114268	0.00325996	5.85101	29.7168	1.92989e-174	8.47919e-173	384.386	PFKFB4
ENSG00000153786	0.00167013	6.53109	29.7077	2.40413e-174	1.05308e-172	384.168	ZDHHC7
ENSG00000147416	0.00253715	8.63613	29.6838	4.2698e-174	1.86465e-172	383.744	ATP6V1B2
ENSG00000225190	0.00173951	5.22611	29.681	4.5746e-174	1.99174e-172	383.527	PLEKHM1
ENSG00000188529	-0.00109566	6.88059	-29.6694	6.04621e-174	2.62456e-172	383.249	SRSF10
ENSG00000121406	-0.00202644	4.14654	-29.6669	6.42131e-174	2.77904e-172	383.425	ZNF549
ENSG00000135316	-0.00118572	6.64964	-29.6559	8.36061e-174	3.60754e-172	382.921	SYNCRIP
ENSG00000203618	0.00487751	2.22149	29.6531	8.94386e-174	3.84772e-172	383.16	GP1BB
ENSG00000103423	-0.00147792	4.43677	-29.6481	1.0094e-173	4.32963e-172	382.903	DNAJA3
ENSG00000089737	-0.00121518	6.78717	-29.6276	1.65162e-173	7.06338e-172	382.24	DDX24
ENSG00000173611	-0.00210598	4.08103	-29.6199	1.98767e-173	8.47543e-172	382.312	SCAI
ENSG00000141526	0.0030022	7.16948	29.6181	2.074e-173	8.81753e-172	382.072	SLC16A3
ENSG00000088832	0.00157532	6.25297	29.613	2.34552e-173	9.94266e-172	381.884	FKBP1A
ENSG00000180509	0.00350067	3.50902	29.6028	2.99394e-173	1.26542e-171	381.796	KCNE1
ENSG00000111678	-0.00297415	3.74729	-29.6001	3.19286e-173	1.34556e-171	381.912	C12orf57
ENSG00000124491	0.00475929	7.77677	29.594	3.70032e-173	1.55489e-171	381.554	F13A1
ENSG00000196329	-0.00199105	7.60132	-29.59	4.07202e-173	1.70612e-171	381.368	GIMAP5
ENSG00000103769	0.00122345	6.02192	29.5674	7.00624e-173	2.92703e-171	380.784	RAB11A
ENSG00000117410	0.00247088	6.76053	29.5637	7.65069e-173	3.18705e-171	380.731	ATP6V0B
ENSG00000149781	0.0020756	6.33844	29.5602	8.33341e-173	3.46148e-171	380.638	FERMT3
ENSG00000072135	0.00134542	5.41617	29.5543	9.60017e-173	3.97623e-171	380.476	PTPN18
ENSG00000120798	-0.00188815	4.03693	-29.5523	1.00691e-172	4.15854e-171	380.689	NR2C1
ENSG00000018699	-0.00191561	3.96367	-29.5487	1.09878e-172	4.52501e-171	380.622	TTC27
ENSG00000204420	0.00443551	1.08081	29.5368	1.45845e-172	5.98917e-171	380.63	C6orf25
ENSG00000119280	0.00328306	2.51085	29.5357	1.49747e-172	6.132e-171	380.381	C1orf198
ENSG00000080839	-0.00175166	4.72012	-29.5251	1.93295e-172	7.89289e-171	379.913	RBL1
ENSG00000159593	-0.0022372	3.87911	-29.5026	3.31437e-172	1.34956e-170	379.541	NAE1
ENSG00000035862	0.00290798	4.74443	29.5001	3.52263e-172	1.43033e-170	379.21	TIMP2
ENSG00000005961	0.00636059	4.41277	29.4976	3.7383e-172	1.51364e-170	379.211	ITGA2B
ENSG00000138798	0.00453216	2.43424	29.4908	4.39756e-172	1.77561e-170	379.29	EGF
ENSG00000184677	-0.00145023	6.00003	-29.4758	6.30645e-172	2.53927e-170	378.611	ZBTB40
ENSG00000198315	-0.00139408	5.52964	-29.4685	7.5047e-172	3.01334e-170	378.461	ZKSCAN8
ENSG00000054967	0.00214147	6.34171	29.4632	8.52525e-172	3.41364e-170	378.307	RELT
ENSG00000134744	-0.00138513	6.24808	-29.4478	1.2336e-171	4.92589e-170	377.935	ZCCHC11
ENSG00000139436	0.00127384	7.16362	29.4426	1.39612e-171	5.55716e-170	377.835	GIT2
ENSG00000125354	-0.00153439	6.25407	-29.4425	1.39938e-171	5.55716e-170	377.808	2025-09-06
ENSG00000214176	0.00163421	6.01684	29.4402	1.47658e-171	5.84766e-170	377.746	PLEKHM1P1
ENSG00000166912	0.00165207	6.83827	29.4253	2.11097e-171	8.33717e-170	377.409	MTMR10
ENSG00000080815	0.00174096	7.28633	29.4172	2.56041e-171	1.00847e-169	377.243	PSEN1
ENSG00000106443	-0.00157961	5.59777	-29.4159	2.64684e-171	1.03968e-169	377.21	PHF14
ENSG00000131389	0.00283853	8.25263	29.4155	2.67065e-171	1.04618e-169	377.284	SLC6A6
ENSG00000168497	0.00464582	6.13766	29.4083	3.16814e-171	1.23772e-169	377.016	SDPR
ENSG00000101935	-0.00167289	4.13098	-29.4066	3.30185e-171	1.28648e-169	377.177	AMMECR1
ENSG00000034693	-0.00208477	3.33189	-29.3835	5.73841e-171	2.22981e-169	376.811	PEX3
ENSG00000197603	-0.00195911	4.92782	-29.382	5.95388e-171	2.30733e-169	376.467	C5orf42
ENSG00000175938	0.00179683	4.24695	29.3806	6.15638e-171	2.37943e-169	376.417	ORAI3
ENSG00000171611	0.00390358	1.34579	29.3785	6.47486e-171	2.49584e-169	376.784	PTCRA
ENSG00000163131	0.00208492	10.6212	29.3762	6.84028e-171	2.62969e-169	376.521	CTSS
ENSG00000115977	-0.00149857	6.91994	-29.372	7.56074e-171	2.89895e-169	376.126	AAK1
ENSG00000082781	0.00463595	3.45861	29.3675	8.4071e-171	3.21494e-169	376.177	ITGB5
ENSG00000103187	0.00204363	7.56236	29.3633	9.29993e-171	3.54698e-169	375.978	COTL1
ENSG00000142405	0.00325211	6.78164	29.3628	9.41488e-171	3.58137e-169	375.932	NLRP12
ENSG00000286065	-0.00273446	5.39928	-29.3463	1.39504e-170	5.29271e-169	375.585	NA
ENSG00000126749	-0.00161607	4.65248	-29.3458	1.41326e-170	5.34783e-169	375.632	EMG1
ENSG00000177721	-0.0023883	3.36368	-29.3414	1.5705e-170	5.92731e-169	375.809	ANXA2R
ENSG00000156639	0.00198157	5.41336	29.3181	2.73796e-170	1.03066e-168	374.828	ZFAND3
ENSG00000143799	-0.00138545	6.52895	-29.3159	2.88843e-170	1.08447e-168	374.779	PARP1
ENSG00000109452	-0.00271314	7.16469	-29.307	3.56831e-170	1.33627e-168	374.594	INPP4B
ENSG00000115325	0.00179025	4.5242	29.2947	4.78213e-170	1.78619e-168	374.339	DOK1
ENSG00000104870	0.00269433	6.69155	29.2937	4.90732e-170	1.82823e-168	374.278	FCGRT
ENSG00000167635	-0.00141457	5.80586	-29.2887	5.52889e-170	2.0545e-168	374.156	ZNF146
ENSG00000075711	-0.0011696	5.76231	-29.2861	5.87007e-170	2.17569e-168	374.086	DLG1
ENSG00000140044	0.00275859	4.34944	29.2786	7.02286e-170	2.5963e-168	373.951	JDP2
ENSG00000076685	0.00207313	7.40755	29.2783	7.07541e-170	2.60906e-168	373.939	NT5C2
ENSG00000114423	-0.00231807	5.54563	-29.2573	1.16707e-169	4.29262e-168	373.441	CBLB
ENSG00000139116	-0.00375729	3.84975	-29.2512	1.34962e-169	4.95145e-168	373.585	KIF21A
ENSG00000065534	0.0045101	4.1108	29.2271	2.40037e-169	8.78415e-168	372.756	MYLK
ENSG00000130449	0.00171255	5.69287	29.2163	3.10573e-169	1.13367e-167	372.393	ZSWIM6
ENSG00000101445	-0.00203978	5.64325	-29.2013	4.4372e-169	1.61561e-167	372.091	PPP1R16B
ENSG00000028137	0.00223779	7.91861	29.183	6.85196e-169	2.48857e-167	371.709	TNFRSF1B
ENSG00000078618	0.00180071	7.51343	29.1758	8.14712e-169	2.95155e-167	371.502	NRDC
ENSG00000259719	0.00272553	1.86921	29.1725	8.80319e-169	3.18125e-167	371.889
ENSG00000071073	-0.00141026	7.46087	-29.1711	9.10682e-169	3.28277e-167	371.354	MGAT4A
ENSG00000205981	-0.00205631	3.69699	-29.1664	1.0186e-168	3.66266e-167	371.552	DNAJC19
ENSG00000168769	0.00223088	8.57378	29.1462	1.64573e-168	5.90299e-167	370.883	TET2
ENSG00000162413	0.00216012	5.99393	29.1456	1.66946e-168	5.97329e-167	370.722	KLHL21
ENSG00000186017	-0.00256565	2.89229	-29.1447	1.70785e-168	6.09554e-167	371.246	ZNF566
ENSG00000254470	0.00311116	6.51763	29.1424	1.80055e-168	6.41057e-167	370.67	AP5B1
ENSG00000198860	-0.00177687	4.52193	-29.1416	1.83632e-168	6.52186e-167	370.797	TSEN15
ENSG00000175182	0.00181108	3.37949	29.1378	2.0127e-168	7.13078e-167	370.777	FAM131A
ENSG00000285693	0.00257482	3.14292	29.1192	3.13097e-168	1.10656e-166	370.35	NA
ENSG00000129226	0.00245548	6.57656	29.1131	3.62225e-168	1.27706e-166	369.972	CD68
ENSG00000130935	-0.00136082	5.08489	-29.1077	4.11374e-168	1.44682e-166	369.907	NOL11
ENSG00000197872	0.00211886	6.92667	29.0996	4.98287e-168	1.74518e-166	369.661	FAM49A
ENSG00000089154	-0.00114881	5.98051	-29.0996	4.98623e-168	1.74518e-166	369.644	GCN1
ENSG00000005436	-0.00202744	3.59524	-29.0961	5.41916e-168	1.89212e-166	369.906	GCFC2
ENSG00000064933	-0.0020308	4.02016	-29.0871	6.71694e-168	2.3396e-166	369.599	PMS1
ENSG00000147316	-0.00148583	5.17276	-29.0851	7.04507e-168	2.44799e-166	369.358	MCPH1
ENSG00000177663	0.00270503	7.58477	29.0763	8.6825e-168	3.00972e-166	369.155	IL17RA
ENSG00000023516	-0.00142078	6.3053	-29.0703	1.00043e-167	3.45961e-166	368.941	AKAP11
ENSG00000198042	-0.00164347	4.10492	-29.0613	1.23777e-167	4.27015e-166	368.96	MAK16
ENSG00000143409	0.00270515	5.375	29.0425	1.93411e-167	6.65658e-166	368.278	FAM63A
ENSG00000067533	-0.00205446	3.52843	-29.0176	3.4974e-167	1.20083e-165	368.06	RRP15
ENSG00000132334	0.00205634	7.87973	29.0071	4.4828e-167	1.53552e-165	367.526	PTPRE
ENSG00000129351	-0.00101793	6.83585	-29.0017	5.09245e-167	1.74022e-165	367.315	ILF3
ENSG00000188785	-0.00198233	4.53379	-28.9993	5.39892e-167	1.8406e-165	367.423	ZNF548
ENSG00000109762	-0.0030408	3.56125	-28.9954	5.9194e-167	2.01329e-165	367.558	SNX25
ENSG00000144535	-0.00158356	4.66579	-28.9822	8.09257e-167	2.74597e-165	366.983	DIS3L2
ENSG00000138380	-0.00203522	4.00249	-28.9694	1.09563e-166	3.70897e-165	366.812	CARF
ENSG00000145996	-0.00150251	4.87658	-28.9546	1.55608e-166	5.25539e-165	366.298	CDKAL1
ENSG00000084070	0.00304864	7.18125	28.9493	1.76503e-166	5.94721e-165	366.123	SMAP2
ENSG00000126001	-0.0013666	5.68782	-28.9405	2.17363e-166	7.30693e-165	365.888	CEP250
ENSG00000164338	-0.00173783	3.70938	-28.9302	2.77568e-166	9.30915e-165	365.939	UTP15
ENSG00000247287	-0.00311385	2.77804	-28.9291	2.84322e-166	9.5136e-165	366.194
ENSG00000113649	-0.00137329	5.52506	-28.9265	3.02846e-166	1.011e-164	365.566	TCERG1
ENSG00000175414	-0.0028328	3.33522	-28.9262	3.05022e-166	1.01592e-164	365.971	ARL10
ENSG00000169045	-0.00131473	8.45729	-28.9191	3.60972e-166	1.19951e-164	365.432	HNRNPH1
ENSG00000130787	-0.002604	4.44801	-28.9143	4.04053e-166	1.33958e-164	365.45	HIP1R
ENSG00000107672	-0.00185477	4.20412	-28.9118	4.28673e-166	1.41796e-164	365.403	NSMCE4A
ENSG00000134243	0.00282135	5.68475	28.9051	5.0213e-166	1.65714e-164	365.023	SORT1
ENSG00000129317	-0.00152107	5.52543	-28.9038	5.17985e-166	1.70557e-164	365.046	PUS7L
ENSG00000142046	0.00284612	4.10751	28.8951	6.36611e-166	2.09141e-164	364.876	TMEM91
ENSG00000115368	-0.00163511	4.93816	-28.8876	7.59556e-166	2.48966e-164	364.716	WDR75
ENSG00000146859	0.00317013	6.87613	28.8779	9.5625e-166	3.12728e-164	364.418	TMEM140
ENSG00000065675	-0.00212582	5.70497	-28.8763	9.92698e-166	3.23915e-164	364.384	PRKCQ
ENSG00000168795	-0.00178125	3.80046	-28.8661	1.26328e-165	4.11277e-164	364.407	ZBTB5
ENSG00000206344	0.00285367	6.7954	28.8623	1.38191e-165	4.48888e-164	364.041	HCG27
ENSG00000085733	0.00468001	3.79294	28.8576	1.54592e-165	5.01039e-164	364.029	CTTN
ENSG00000236088	-0.00207623	4.2971	-28.8461	2.02963e-165	6.56337e-164	363.845	COX10-AS1
ENSG00000115762	0.00122896	6.94189	28.8445	2.10456e-165	6.79049e-164	363.61	PLEKHB2
ENSG00000175215	0.00168094	7.0044	28.8302	2.95007e-165	9.49738e-164	363.283	CTDSP2
ENSG00000154511	-0.00250406	3.31431	-28.8188	3.86487e-165	1.24148e-163	363.425	FAM69A
ENSG00000100439	0.0021986	4.07581	28.8103	4.72543e-165	1.51455e-163	362.882	ABHD4
ENSG00000247828	-0.00168841	6.39767	-28.7989	6.18074e-165	1.9766e-163	362.529	TMEM161B-AS1
ENSG00000079805	0.00127943	6.93114	28.7844	8.70622e-165	2.77811e-163	362.193	DNM2
ENSG00000181722	-0.0013167	6.92692	-28.7783	1.00594e-164	3.20283e-163	362.036	ZBTB20
ENSG00000089220	-0.00175534	5.15354	-28.7574	1.64576e-164	5.22847e-163	361.624	PEBP1
ENSG00000130684	-0.0017747	4.93483	-28.7563	1.68941e-164	5.35536e-163	361.616	ZNF337
ENSG00000130921	-0.00183188	3.98158	-28.7544	1.76565e-164	5.58478e-163	361.738	C12orf65
ENSG00000205045	-0.00260436	5.30125	-28.7459	2.15964e-164	6.81608e-163	361.352	SLFN12L
ENSG00000127804	-0.00176112	3.88582	-28.7382	2.58614e-164	8.14437e-163	361.371	METTL16
ENSG00000157350	0.00206291	6.38488	28.727	3.36915e-164	1.05872e-162	360.828	ST3GAL2
ENSG00000180479	-0.0029665	2.45437	-28.7258	3.46386e-164	1.08612e-162	361.461	ZNF571
ENSG00000175489	0.00290783	6.12877	28.7112	4.89678e-164	1.5321e-162	360.461	LRRC25
ENSG00000186074	0.00230821	5.26591	28.711	4.91316e-164	1.5339e-162	360.445	CD300LF
ENSG00000198113	0.0020305	3.19503	28.709	5.14707e-164	1.60347e-162	360.655	TOR4A
ENSG00000154146	0.00358497	2.06171	28.7014	6.16012e-164	1.91494e-162	360.604	NRGN
ENSG00000115561	0.00132251	6.38374	28.6863	8.78976e-164	2.72652e-162	359.859	CHMP3
ENSG00000147231	-0.00322503	2.52198	-28.6857	8.90978e-164	2.75783e-162	360.519	CXorf57
ENSG00000114316	0.00174459	7.17644	28.6731	1.1996e-163	3.70519e-162	359.59	USP4
ENSG00000105339	0.00272437	7.95029	28.6686	1.33412e-163	4.11188e-162	359.549	DENND3
ENSG00000136404	0.00266844	4.67166	28.6662	1.41289e-163	4.34537e-162	359.422	TM6SF1
ENSG00000214212	0.00246747	4.94494	28.6647	1.46114e-163	4.48424e-162	359.377	C19orf38
ENSG00000137760	-0.00174823	3.88329	-28.6576	1.72975e-163	5.29736e-162	359.474	ALKBH8
ENSG00000139083	0.00174376	5.14675	28.6556	1.81332e-163	5.54156e-162	359.146	ETV6
ENSG00000070614	0.00332889	5.25764	28.6554	1.82238e-163	5.55748e-162	359.146	NDST1
ENSG00000161011	0.00195437	7.30644	28.6552	1.82951e-163	5.56749e-162	359.181	SQSTM1
ENSG00000047644	0.00208315	5.74493	28.6493	2.10155e-163	6.38191e-162	358.985	WWC3
ENSG00000135363	0.00234483	5.37429	28.6397	2.63211e-163	7.97633e-162	358.764	LMO2
ENSG00000169991	-0.00203931	4.74916	-28.6381	2.73173e-163	8.2517e-162	358.87	IFFO2
ENSG00000140199	0.00211325	8.02249	28.6381	2.73439e-163	8.2517e-162	358.83	SLC12A6
ENSG00000275023	-0.00149782	6.06876	-28.6349	2.94922e-163	8.88144e-162	358.669	MLLT6
ENSG00000106351	-0.00232073	3.547	-28.6238	3.82616e-163	1.14984e-161	358.769	AGFG2
ENSG00000114626	0.0029514	6.90197	28.6217	4.02628e-163	1.20747e-161	358.385	ABTB1
ENSG00000171310	0.00209701	7.26313	28.6207	4.11913e-163	1.23275e-161	358.368	CHST11
ENSG00000158417	-0.00146888	4.66039	-28.6161	4.58883e-163	1.37049e-161	358.346	EIF5B
ENSG00000251369	-0.00221398	4.09004	-28.6145	4.75968e-163	1.41858e-161	358.438	ZNF550
ENSG00000102218	0.00220184	6.39675	28.6096	5.34236e-163	1.58897e-161	358.067	RP2
ENSG00000065615	0.00175893	7.06828	28.6018	6.42196e-163	1.90615e-161	357.908	CYB5R4
ENSG00000142188	-0.00191168	4.69477	-28.6009	6.55544e-163	1.94178e-161	358.002	TMEM50B
ENSG00000182022	0.00301741	8.1593	28.5958	7.39387e-163	2.18565e-161	357.858	CHST15
ENSG00000235568	0.00311643	6.30651	28.595	7.53652e-163	2.22327e-161	357.734	NFAM1
ENSG00000186416	-0.00178774	3.52755	-28.5947	7.59093e-163	2.23476e-161	358.078	NKRF
ENSG00000100523	-0.00157081	6.47995	-28.5939	7.73262e-163	2.27185e-161	357.696	DDHD1
ENSG00000102230	0.0041973	0.331985	28.5891	8.65695e-163	2.53826e-161	358.31	PCYT1B
ENSG00000177119	0.00188265	6.64667	28.5784	1.11196e-162	3.25371e-161	357.342	ANO6
ENSG00000109920	-0.00128971	6.44057	-28.5751	1.20136e-162	3.5082e-161	357.252	FNBP4
ENSG00000105887	0.00168856	7.95207	28.5581	1.79106e-162	5.2197e-161	356.943	MTPN
ENSG00000196670	-0.00166597	5.30729	-28.5552	1.91779e-162	5.57781e-161	356.851	ZFP62
ENSG00000136628	-0.00118502	6.48059	-28.553	2.02197e-162	5.869e-161	356.731	EPRS
ENSG00000136869	0.00313143	9.02088	28.5453	2.42399e-162	7.0218e-161	356.74	TLR4
ENSG00000108960	0.00365842	5.03529	28.5352	3.06647e-162	8.86516e-161	356.34	MMD
ENSG00000107077	-0.00112865	6.66172	-28.5331	3.22478e-162	9.30423e-161	356.263	KDM4C
ENSG00000147459	0.00281259	8.32061	28.5269	3.73344e-162	1.07504e-160	356.249	DOCK5
ENSG00000071794	-0.00181883	4.316	-28.5209	4.28994e-162	1.23282e-160	356.187	HLTF
ENSG00000064651	-0.00188427	3.89186	-28.5159	4.83165e-162	1.38575e-160	356.149	SLC12A2
ENSG00000181827	-0.00160264	5.06722	-28.5035	6.45908e-162	1.84883e-160	355.657	RFX7
ENSG00000136897	-0.00212688	3.96878	-28.4989	7.18892e-162	2.05367e-160	355.741	MRPL50
ENSG00000127922	-0.00211224	3.48934	-28.4983	7.29761e-162	2.08061e-160	355.83	SHFM1
ENSG00000172197	0.00170357	5.35761	28.4954	7.8146e-162	2.22362e-160	355.375	MBOAT1
ENSG00000170832	0.00248638	8.17953	28.4894	8.98642e-162	2.55204e-160	355.36	USP32
ENSG00000241553	0.00146461	7.42806	28.4804	1.10982e-161	3.14559e-160	355.08	ARPC4
ENSG00000133961	0.00231728	6.69119	28.4658	1.56389e-161	4.42388e-160	354.707	NUMB
ENSG00000147224	-0.00139983	4.52888	-28.4644	1.61536e-161	4.55276e-160	354.807	PRPS1
ENSG00000071553	0.00160957	5.392	28.4644	1.61575e-161	4.55276e-160	354.655	ATP6AP1
ENSG00000042088	-0.00152888	4.53198	-28.4468	2.43794e-161	6.85611e-160	354.402	TDP1
ENSG00000255310	-0.00273117	2.7921	-28.4413	2.77126e-161	7.77837e-160	354.702
ENSG00000003402	0.00195968	9.74487	28.4374	3.04258e-161	8.52335e-160	354.252	CFLAR
ENSG00000166091	0.00449504	1.87521	28.4332	3.35181e-161	9.37144e-160	354.332	CMTM5
ENSG00000091490	-0.00216308	6.20331	-28.4325	3.40732e-161	9.50826e-160	353.928	SEL1L3
ENSG00000163026	-0.00182907	3.42613	-28.4285	3.74062e-161	1.04182e-159	354.208	WDCP
ENSG00000166900	0.00284675	7.13092	28.4264	3.93545e-161	1.09398e-159	353.814	STX3
ENSG00000198700	-0.00122894	5.51616	-28.4257	4.00078e-161	1.11001e-159	353.779	IPO9
ENSG00000111300	-0.00146453	4.98833	-28.4053	6.44875e-161	1.78576e-159	353.365	NAA25
ENSG00000084234	0.00220528	7.59825	28.381	1.13887e-160	3.14769e-159	352.776	APLP2
ENSG00000100316	-0.00185492	9.18644	-28.3771	1.24614e-160	3.43758e-159	352.738	RPL3
ENSG00000132182	-0.00135955	6.27654	-28.3672	1.57054e-160	4.32421e-159	352.394	NUP210
ENSG00000172315	-0.00148761	4.68261	-28.3662	1.60952e-160	4.42313e-159	352.492	TP53RK
ENSG00000174953	-0.00109966	5.93663	-28.3543	2.12686e-160	5.83373e-159	352.09	DHX36
ENSG00000168461	0.00292829	7.43557	28.342	2.83408e-160	7.75883e-159	351.865	RAB31
ENSG00000133706	-0.00122842	6.57067	-28.3385	3.07343e-160	8.39819e-159	351.711	LARS
ENSG00000213977	0.00243417	3.49491	28.3365	3.22263e-160	8.78927e-159	351.846	TAX1BP3
ENSG00000112249	-0.00130071	6.79614	-28.3346	3.36918e-160	9.17165e-159	351.623	ASCC3
ENSG00000011295	-0.00165304	4.5601	-28.3341	3.40402e-160	9.24909e-159	351.764	TTC19
ENSG00000159433	-0.0031084	4.36262	-28.328	3.92984e-160	1.06577e-158	351.694	STARD9
ENSG00000125944	-0.00103526	6.87701	-28.3244	4.26899e-160	1.15559e-158	351.389	HNRNPR
ENSG00000135838	0.00302303	6.28261	28.323	4.41319e-160	1.19239e-158	351.362	NPL
ENSG00000060558	0.00230397	3.62254	28.321	4.6288e-160	1.24831e-158	351.469	GNA15
ENSG00000147526	0.00132141	7.70623	28.3192	4.82215e-160	1.29803e-158	351.327	TACC1
ENSG00000134852	-0.0016787	4.59966	-28.319	4.84774e-160	1.30249e-158	351.409	CLOCK
ENSG00000173334	0.0027428	4.95445	28.3188	4.86511e-160	1.30473e-158	351.266	TRIB1
ENSG00000130775	0.00242851	8.14883	28.3187	4.8817e-160	1.30676e-158	351.363	THEMIS2
ENSG00000151702	0.00111662	7.45235	28.3179	4.97205e-160	1.32848e-158	351.277	FLI1
ENSG00000133114	-0.00161083	4.33413	-28.2893	9.70451e-160	2.58817e-158	350.756	GPALPP1
ENSG00000131069	0.00182354	4.24784	28.289	9.75818e-160	2.59769e-158	350.642	ACSS2
ENSG00000112365	-0.00137038	5.13338	-28.2878	1.00407e-159	2.66797e-158	350.602	ZBTB24
ENSG00000177889	-0.00113004	5.53412	-28.2808	1.18118e-159	3.13285e-158	350.397	UBE2N
ENSG00000186635	0.00227619	7.31602	28.2748	1.36074e-159	3.60247e-158	350.279	ARAP1
ENSG00000072422	0.00401416	2.55114	28.271	1.485e-159	3.92426e-158	350.459	RHOBTB1
ENSG00000137462	0.00348119	8.47371	28.2548	2.16966e-159	5.72308e-158	349.914	TLR2
ENSG00000119760	-0.0013099	5.22945	-28.2545	2.18418e-159	5.75087e-158	349.812	SUPT7L
ENSG00000067182	0.00262075	6.17097	28.2452	2.71275e-159	7.12959e-158	349.539	TNFRSF1A
ENSG00000085721	-0.00137682	5.23726	-28.2367	3.30558e-159	8.6719e-158	349.403	RRN3
ENSG00000167232	-0.00217882	6.41029	-28.2196	4.92994e-159	1.29098e-157	348.966	ZNF91
ENSG00000112685	-0.00130458	5.91806	-28.2174	5.18866e-159	1.35628e-157	348.901	EXOC2
ENSG00000109103	0.00178217	5.91291	28.2084	6.39189e-159	1.66778e-157	348.675	UNC119
ENSG00000175893	-0.00243977	5.05656	-28.1935	9.05568e-159	2.35856e-157	348.457	ZDHHC21
ENSG00000144040	0.0019381	4.3034	28.1913	9.53045e-159	2.47775e-157	348.365	SFXN5
ENSG00000049323	0.00442748	4.09405	28.1896	9.90732e-159	2.5711e-157	348.338	LTBP1
ENSG00000132436	-0.00209939	3.57081	-28.1843	1.12125e-158	2.9046e-157	348.483	FIGNL1
ENSG00000136169	-0.00144634	4.94628	-28.177	1.32762e-158	3.43306e-157	348.047	SETDB2
ENSG00000117984	0.00249849	7.15769	28.1734	1.44668e-158	3.73424e-157	347.919	CTSD
ENSG00000198585	0.00202338	5.66952	28.1726	1.47184e-158	3.79241e-157	347.837	NUDT16
ENSG00000163932	0.00256332	6.03331	28.1659	1.72003e-158	4.42403e-157	347.692	PRKCD
ENSG00000226688	-0.00175772	4.10764	-28.1647	1.77022e-158	4.54504e-157	347.902	ENTPD1-AS1
ENSG00000086712	-0.00145755	4.33983	-28.1604	1.95404e-158	5.00809e-157	347.753	TXLNG
ENSG00000166439	0.00123984	7.44743	28.1569	2.11984e-158	5.4234e-157	347.529	RNF169
ENSG00000143515	-0.00183499	6.74335	-28.1519	2.38219e-158	6.08384e-157	347.377	ATP8B2
ENSG00000163737	0.0050562	5.2051	28.1388	3.23067e-158	8.23622e-157	347.095	PF4
ENSG00000107771	-0.00148435	6.4814	-28.1378	3.30576e-158	8.41281e-157	347.043	CCSER2
ENSG00000238105	-0.00273543	3.77786	-28.1244	4.5139e-158	1.14672e-156	347.07	GOLGA2P5
ENSG00000197063	0.00197889	3.31282	28.1238	4.57719e-158	1.16076e-156	346.948	MAFG
ENSG00000167703	0.00281923	6.27899	28.1193	5.08592e-158	1.28751e-156	346.621	SLC43A2
ENSG00000103994	0.00184614	8.28154	28.1173	5.32532e-158	1.34576e-156	346.678	ZNF106
ENSG00000163931	0.00268874	8.54523	28.1146	5.67105e-158	1.43063e-156	346.645	TKT
ENSG00000131089	-0.00186493	4.18875	-28.1137	5.7992e-158	1.46041e-156	346.7	ARHGEF9
ENSG00000167996	0.00281847	7.66025	28.1027	7.48088e-158	1.88063e-156	346.312	FTH1
ENSG00000090376	0.00314335	7.34458	28.1012	7.74069e-158	1.94256e-156	346.258	IRAK3
ENSG00000151893	0.0016912	7.13746	28.09	1.00561e-157	2.51925e-156	345.961	CACUL1
ENSG00000163719	0.00114264	5.7395	28.0881	1.05109e-157	2.62863e-156	345.872	MTMR14
ENSG00000068383	0.00189858	4.57261	28.0876	1.0624e-157	2.65234e-156	345.92	INPP5A
ENSG00000162889	0.00175553	5.9002	28.0856	1.11365e-157	2.77549e-156	345.816	MAPKAPK2
ENSG00000100596	0.00180986	7.21496	28.0839	1.15831e-157	2.88183e-156	345.827	SPTLC2
ENSG00000062716	0.00227689	8.55139	28.0823	1.20174e-157	2.98472e-156	345.893	VMP1
ENSG00000128694	-0.00235251	2.67932	-28.0822	1.20578e-157	2.98962e-156	346.34	OSGEPL1
ENSG00000126261	-0.00112139	5.76425	-28.0755	1.40656e-157	3.48147e-156	345.611	UBA2
ENSG00000204424	0.00427073	1.61471	28.0741	1.45588e-157	3.5974e-156	346.015	LY6G6F
ENSG00000182511	0.00273114	5.93549	28.065	1.79782e-157	4.43473e-156	345.362	FES
ENSG00000156017	-0.00174139	4.049	-28.0648	1.80436e-157	4.44326e-156	345.595	CARNMT1
ENSG00000104763	0.00219718	8.2724	28.0631	1.87913e-157	4.61953e-156	345.423	ASAH1
ENSG00000183161	-0.00180763	3.74101	-28.0626	1.8998e-157	4.66241e-156	345.612	FANCF
ENSG00000101150	0.00214751	6.62758	28.0568	2.17327e-157	5.32452e-156	345.169	TPD52L2
ENSG00000257923	0.00155743	5.28824	28.0521	2.42649e-157	5.93484e-156	345.048	CUX1
ENSG00000179604	0.00261575	1.46451	28.0454	2.82973e-157	6.90943e-156	345.519	CDC42EP4
ENSG00000102265	0.0026922	4.60809	28.0226	4.81056e-157	1.17263e-155	344.407	TIMP1
ENSG00000088833	0.00194185	5.87443	28.0212	4.9684e-157	1.20906e-155	344.321	NSFL1C
ENSG00000139146	-0.00132156	5.32419	-28.0161	5.59247e-157	1.35864e-155	344.268	FAM60A
ENSG00000092470	-0.00219405	3.27062	-28.0158	5.62676e-157	1.36468e-155	344.646	WDR76
ENSG00000160613	-0.00133157	6.87853	-28.0045	7.31228e-157	1.7705e-155	343.956	PCSK7
ENSG00000121060	0.00282342	7.56378	28.0038	7.4372e-157	1.79774e-155	344.005	TRIM25
ENSG00000159267	-0.00221286	3.91342	-27.9964	8.83291e-157	2.13155e-155	344.047	HLCS
ENSG00000255529	-0.00153535	5.18073	-27.9784	1.33855e-156	3.2248e-155	343.421	POLR2M
ENSG00000184205	-0.00253296	3.40311	-27.9776	1.36333e-156	3.27902e-155	343.747	TSPYL2
ENSG00000164038	-0.00246117	2.92476	-27.967	1.74425e-156	4.18823e-155	343.619	SLC9B2
ENSG00000165879	0.00279175	5.93678	27.9646	1.84505e-156	4.42293e-155	343.019	FRAT1
ENSG00000065150	-0.00129293	5.72222	-27.9586	2.11834e-156	5.06965e-155	342.904	IPO5
ENSG00000124374	-0.00285912	3.27445	-27.9576	2.1665e-156	5.17633e-155	343.331	PAIP2B
ENSG00000110931	0.00226957	6.30139	27.9561	2.24383e-156	5.35224e-155	342.826	CAMKK2
ENSG00000139946	0.00244988	6.4611	27.9523	2.4511e-156	5.837e-155	342.746	PELI2
ENSG00000156531	-0.00142104	4.8399	-27.9496	2.60929e-156	6.20351e-155	342.788	PHF6
ENSG00000181450	-0.00214509	4.57242	-27.9474	2.74682e-156	6.51975e-155	342.798	ZNF678
ENSG00000101307	0.00296366	6.24134	27.9431	3.03083e-156	7.18206e-155	342.535	SIRPB1
ENSG00000148498	0.00375142	1.65226	27.9347	3.68784e-156	8.72466e-155	342.825	PARD3
ENSG00000111203	-0.00144904	4.60791	-27.9314	3.97806e-156	9.39589e-155	342.392	ITFG2
ENSG00000184014	0.00225594	7.9622	27.9279	4.31097e-156	1.01656e-154	342.27	DENND5A
ENSG00000011600	0.00267335	7.225	27.9242	4.70272e-156	1.10713e-154	342.141	TYROBP
ENSG00000121892	-0.000919056	7.03011	-27.9188	5.3235e-156	1.25124e-154	341.967	PDS5A
ENSG00000197442	0.00167464	7.33125	27.9155	5.74284e-156	1.34761e-154	341.931	MAP3K5
ENSG00000108559	-0.00181069	4.73461	-27.915	5.81055e-156	1.36129e-154	342.004	NUP88
ENSG00000067560	0.00161326	8.61756	27.9082	6.80569e-156	1.59185e-154	341.855	RHOA
ENSG00000198270	-0.00222226	3.91412	-27.9047	7.37947e-156	1.72327e-154	341.926	TMEM116
ENSG00000168724	-0.0012605	5.02871	-27.9038	7.53419e-156	1.75656e-154	341.698	DNAJC21
ENSG00000167460	0.00174605	7.51377	27.9034	7.60208e-156	1.76953e-154	341.667	TPM4
ENSG00000164114	-0.00329146	2.36399	-27.8971	8.80494e-156	2.04623e-154	342.155	MAP9
ENSG00000197548	0.00151967	5.85057	27.8968	8.85239e-156	2.05395e-154	341.441	ATG7
ENSG00000167699	-0.00133579	4.82337	-27.895	9.22669e-156	2.13737e-154	341.519	GLOD4
ENSG00000100722	-0.00109529	5.20463	-27.8936	9.54115e-156	2.20668e-154	341.437	ZC3H14
ENSG00000213463	-0.00160672	4.90434	-27.884	1.19132e-155	2.75089e-154	341.267	SYNJ2BP
ENSG00000175322	-0.00263987	3.22333	-27.8729	1.53871e-155	3.54737e-154	341.37	ZNF519
ENSG00000113719	0.00268032	7.30426	27.8646	1.86458e-155	4.2918e-154	340.766	ERGIC1
ENSG00000146285	-0.00186288	6.05802	-27.8623	1.96802e-155	4.52269e-154	340.673	SCML4
ENSG00000135677	0.00219088	7.78166	27.8585	2.14889e-155	4.9305e-154	340.653	GNS
ENSG00000166261	-0.00167681	3.81854	-27.8516	2.51861e-155	5.76965e-154	340.707	ZNF202
ENSG00000177674	0.00217451	5.09018	27.8477	2.75886e-155	6.31003e-154	340.337	AGTRAP
ENSG00000164151	-0.00103955	5.96431	-27.8437	3.02569e-155	6.90937e-154	340.23	ICE1
ENSG00000186106	-0.00180469	3.69937	-27.8393	3.34413e-155	7.62451e-154	340.454	ANKRD46
ENSG00000146094	0.00294767	5.32828	27.8389	3.37753e-155	7.68852e-154	340.132	DOK3
ENSG00000198851	-0.00290746	3.84827	-27.8324	3.92692e-155	8.9251e-154	340.302	CD3E
ENSG00000164713	0.0022727	4.95112	27.8318	3.98059e-155	9.03289e-154	339.966	BRI3
ENSG00000048740	0.00114859	8.36067	27.8282	4.31878e-155	9.78495e-154	339.981	CELF2
ENSG00000064999	0.00156348	4.54546	27.8205	5.16857e-155	1.1692e-153	339.748	ANKS1A
ENSG00000008277	-0.00355736	2.58279	-27.8177	5.51285e-155	1.24513e-153	340.29	ADAM22
ENSG00000136717	-0.00189823	5.13768	-27.8141	5.98843e-155	1.35043e-153	339.641	BIN1
ENSG00000050405	-0.00255222	3.45283	-27.8031	7.70973e-155	1.73589e-153	339.699	LIMA1
ENSG00000197961	-0.00161734	5.66479	-27.798	8.67404e-155	1.94997e-153	339.214	ZNF121
ENSG00000164466	-0.00171788	4.94619	-27.7937	9.58369e-155	2.15112e-153	339.18	SFXN1
ENSG00000169914	-0.00179024	3.93884	-27.7905	1.03142e-154	2.31149e-153	339.274	OTUD3
ENSG00000118960	0.0013545	4.7725	27.7855	1.15942e-154	2.59433e-153	338.927	HS1BP3
ENSG00000152582	-0.00314831	3.23636	-27.7792	1.33878e-154	2.99104e-153	339.217	SPEF2
ENSG00000122965	-0.00141276	4.98923	-27.7775	1.39209e-154	3.10535e-153	338.79	RBM19
ENSG00000105849	-0.00190511	3.55463	-27.7771	1.40574e-154	3.13097e-153	339.053	TWISTNB
ENSG00000140006	-0.00270067	3.52798	-27.7606	2.05639e-154	4.57309e-153	338.699	WDR89
ENSG00000114353	0.00188472	7.65492	27.7591	2.13174e-154	4.73338e-153	338.347	GNAI2
ENSG00000158691	-0.0020739	3.60271	-27.7562	2.27851e-154	5.0515e-153	338.566	ZSCAN12
ENSG00000180304	0.00246244	6.64874	27.7477	2.77116e-154	6.13431e-153	338.033	OAZ2
ENSG00000223705	-0.00228162	4.62217	-27.7458	2.89531e-154	6.39933e-153	338.133	NSUN5P1
ENSG00000179335	0.00118943	6.57976	27.7416	3.18701e-154	7.03333e-153	337.875	CLK3
ENSG00000149273	-0.00164419	8.37799	-27.7312	4.04752e-154	8.91874e-153	337.709	RPS3
ENSG00000144909	0.00172125	6.24329	27.7263	4.53681e-154	9.98167e-153	337.516	OSBPL11
ENSG00000103502	0.00225569	5.68806	27.7241	4.77548e-154	1.04908e-152	337.472	CDIPT
ENSG00000155099	0.0025813	5.42804	27.7235	4.83847e-154	1.06131e-152	337.455	TMEM55A
ENSG00000256223	-0.00240099	3.1501	-27.7161	5.73611e-154	1.2563e-152	337.765	ZNF10
ENSG00000090905	-0.00117316	6.10025	-27.7143	5.98044e-154	1.30783e-152	337.247	TNRC6A
ENSG00000165512	-0.00224112	4.00332	-27.704	7.5779e-154	1.65466e-152	337.28	ZNF22
ENSG00000163947	-0.00130601	6.36242	-27.702	7.93395e-154	1.72979e-152	336.96	ARHGEF3
ENSG00000135297	-0.00141372	5.2066	-27.7008	8.15952e-154	1.77629e-152	336.999	MTO1
ENSG00000132155	0.00209235	7.73066	27.6959	9.1327e-154	1.98516e-152	336.9	RAF1
ENSG00000198205	-0.00217585	3.77729	-27.692	1.00018e-153	2.17081e-152	337.058	ZXDA
ENSG00000074695	-0.00161948	5.54632	-27.6698	1.66664e-153	3.6119e-152	336.268	LMAN1
ENSG00000272316	-0.00241466	3.89407	-27.665	1.86048e-153	4.02593e-152	336.416
ENSG00000163564	-0.00299639	5.4203	-27.6586	2.15525e-153	4.65681e-152	336.045	PYHIN1
ENSG00000137207	0.00209874	4.72988	27.6555	2.31368e-153	4.99168e-152	335.929	YIPF3
ENSG00000116701	0.00286944	9.51331	27.6551	2.33442e-153	5.02892e-152	336.111	NCF2
ENSG00000166523	0.00404397	5.67644	27.6494	2.66277e-153	5.72773e-152	335.764	CLEC4E
ENSG00000083123	-0.00211482	3.17893	-27.6455	2.9105e-153	6.25131e-152	336.13	BCKDHB
ENSG00000159128	0.00252354	7.13524	27.6401	3.29686e-153	7.07063e-152	335.586	IFNGR2
ENSG00000118961	-0.00182319	3.93312	-27.6376	3.4904e-153	7.47463e-152	335.76	LDAH
ENSG00000100647	0.00210259	5.68847	27.6349	3.71782e-153	7.94986e-152	335.416	SUSD6
ENSG00000120868	0.00208695	7.34916	27.6234	4.84329e-153	1.03412e-151	335.208	APAF1
ENSG00000177125	0.0021249	6.77204	27.6224	4.94824e-153	1.05497e-151	335.153	ZBTB34
ENSG00000103507	0.00186906	4.0257	27.6222	4.97569e-153	1.05926e-151	335.252	BCKDK
ENSG00000156804	-0.00238855	3.86634	-27.6074	6.98857e-153	1.48559e-151	335.1	FBXO32
ENSG00000118971	-0.00159421	6.71205	-27.6048	7.426e-153	1.57625e-151	334.731	CCND2
ENSG00000150347	-0.00182871	5.82645	-27.6035	7.65139e-153	1.62171e-151	334.724	ARID5B
ENSG00000132694	0.00224403	4.96189	27.5993	8.41183e-153	1.78028e-151	334.62	ARHGEF11
ENSG00000254004	-0.0023243	3.55476	-27.5937	9.57509e-153	2.02351e-151	334.846	ZNF260
ENSG00000083544	-0.00162432	4.22096	-27.5891	1.06339e-152	2.24399e-151	334.581	TDRD3
ENSG00000075407	-0.00157	5.25467	-27.5879	1.09449e-152	2.30625e-151	334.412	ZNF37A
ENSG00000027697	0.00204772	7.59323	27.5833	1.21654e-152	2.5597e-151	334.306	IFNGR1
ENSG00000166963	0.0031203	1.5626	27.5795	1.32631e-152	2.7866e-151	334.707	MAP1A
ENSG00000165733	-0.0014078	5.21661	-27.5783	1.36321e-152	2.85998e-151	334.187	BMS1
ENSG00000139154	-0.00155067	4.63562	-27.5672	1.76117e-152	3.68952e-151	334.013	AEBP2
ENSG00000112531	0.00192193	7.90624	27.5552	2.31444e-152	4.84157e-151	333.681	QKI
ENSG00000167395	0.00145845	5.87938	27.5459	2.86489e-152	5.98438e-151	333.381	ZNF646
ENSG00000161010	-0.00271758	3.38943	-27.5422	3.12111e-152	6.5102e-151	333.723	C5orf45
ENSG00000141298	0.00237743	8.66073	27.5372	3.49927e-152	7.28846e-151	333.333	SSH2
ENSG00000095002	-0.00198619	4.2868	-27.5369	3.52474e-152	7.33096e-151	333.39	MSH2
ENSG00000104814	-0.00191339	3.79759	-27.5367	3.5451e-152	7.3627e-151	333.471	MAP4K1
ENSG00000168010	0.00243924	7.62553	27.5333	3.83048e-152	7.94399e-151	333.164	ATG16L2
ENSG00000204592	0.0019638	11.1052	27.5304	4.09411e-152	8.47856e-151	333.361	HLA-E
ENSG00000169564	0.001635	6.10268	27.5293	4.20107e-152	8.68761e-151	332.991	PCBP1
ENSG00000170242	-0.00103592	6.64442	-27.5272	4.40841e-152	9.10337e-151	332.949	USP47
ENSG00000102393	0.00193788	4.05209	27.5238	4.76139e-152	9.81825e-151	332.978	GLA
ENSG00000239998	0.0030978	6.10924	27.5236	4.77978e-152	9.84212e-151	332.877	LILRA2
ENSG00000160593	0.0023558	9.55492	27.5123	6.19939e-152	1.27471e-150	332.83	JAML
ENSG00000101152	0.00157754	6.59798	27.5095	6.60446e-152	1.35607e-150	332.554	DNAJC5
ENSG00000149308	-0.00108615	6.5354	-27.5092	6.6554e-152	1.36459e-150	332.537	NPAT
ENSG00000131127	-0.00187845	5.77807	-27.5063	7.10681e-152	1.45508e-150	332.519	ZNF141
ENSG00000166579	0.00191191	6.95026	27.5036	7.56144e-152	1.54598e-150	332.436	NDEL1
ENSG00000184465	-0.0020092	4.14324	-27.5005	8.12529e-152	1.65891e-150	332.582	WDR27
ENSG00000100226	0.00195251	5.60989	27.4927	9.71067e-152	1.9798e-150	332.155	GTPBP1
ENSG00000138735	0.00419035	4.72235	27.4919	9.88508e-152	2.01252e-150	332.188	PDE5A
ENSG00000186687	-0.00179089	4.27286	-27.4818	1.24671e-151	2.53462e-150	332.127	LYRM7
ENSG00000243943	-0.00123446	5.25147	-27.4756	1.4374e-151	2.9182e-150	331.823	ZNF512
ENSG00000258890	-0.00162145	4.67166	-27.473	1.52366e-151	3.089e-150	331.845	CEP95
ENSG00000150977	0.00192749	5.32926	27.4589	2.10552e-151	4.26265e-150	331.386	RILPL2
ENSG00000006534	0.00236123	4.32666	27.4561	2.24558e-151	4.53984e-150	331.397	ALDH3B1
ENSG00000113456	-0.00157459	3.7789	-27.454	2.35741e-151	4.75927e-150	331.575	RAD1
ENSG00000198799	-0.00120244	5.09435	-27.4522	2.45218e-151	4.94369e-150	331.302	LRIG2
ENSG00000070413	0.00182283	6.143	27.4498	2.59243e-151	5.21916e-150	331.183	DGCR2
ENSG00000189164	-0.00232334	2.9652	-27.4479	2.70694e-151	5.44212e-150	331.657	ZNF527
ENSG00000110876	0.00222539	7.65542	27.4476	2.72606e-151	5.47295e-150	331.204	SELPLG
ENSG00000086730	0.0024419	6.78094	27.4421	3.09162e-151	6.19824e-150	331.028	LAT2
ENSG00000140382	-0.00118581	5.03316	-27.4404	3.21382e-151	6.43432e-150	331.041	HMG20A
ENSG00000181007	-0.00282074	3.13444	-27.4331	3.7972e-151	7.59177e-150	331.29	ZFP82
ENSG00000197694	-0.00143954	7.00732	-27.4278	4.29184e-151	8.56886e-150	330.685	SPTAN1
ENSG00000178105	-0.00155803	4.49819	-27.4225	4.83966e-151	9.64928e-150	330.721	DDX10
ENSG00000273015	-0.00167078	5.29498	-27.415	5.75119e-151	1.14509e-149	330.456
ENSG00000136156	0.00242984	10.0216	27.4126	6.07522e-151	1.20794e-149	330.587	ITM2B
ENSG00000047932	-0.00107463	5.6025	-27.4033	7.50707e-151	1.49059e-149	330.148	GOPC
ENSG00000112977	0.00204893	4.35619	27.3953	9.01754e-151	1.78805e-149	330.002	DAP
ENSG00000203791	-0.0018056	3.72545	-27.3951	9.05192e-151	1.7924e-149	330.252	METTL10
ENSG00000103313	0.00306317	7.47468	27.3939	9.31971e-151	1.84291e-149	329.975	MEFV
ENSG00000172795	0.00141783	8.27504	27.3884	1.05666e-150	2.08661e-149	329.884	DCP2
ENSG00000145241	-0.00145082	6.08064	-27.3788	1.31421e-150	2.59167e-149	329.572	CENPC
ENSG00000111727	-0.00132272	4.53108	-27.376	1.40308e-150	2.76315e-149	329.645	HCFC2
ENSG00000174282	-0.00139235	5.06733	-27.3752	1.42817e-150	2.80874e-149	329.55	ZBTB4
ENSG00000011105	0.0040144	1.50287	27.3745	1.45037e-150	2.84852e-149	329.955	TSPAN9
ENSG00000243406	-0.00223972	2.9325	-27.3723	1.52463e-150	2.99029e-149	329.942	MRPS31P5
ENSG00000120699	-0.00195891	3.73184	-27.3694	1.63044e-150	3.1935e-149	329.666	EXOSC8
ENSG00000149269	0.00241573	7.05843	27.3668	1.72834e-150	3.38067e-149	329.325	PAK1
ENSG00000196209	0.0028578	5.67501	27.3531	2.36225e-150	4.61437e-149	328.97	SIRPB2
ENSG00000154237	0.00193013	4.41042	27.352	2.42484e-150	4.73024e-149	329.012	LRRK1
ENSG00000109016	0.00158233	3.69915	27.3486	2.62211e-150	5.10817e-149	329.051	DHRS7B
ENSG00000173210	0.00418563	1.41176	27.3377	3.36007e-150	6.53699e-149	329.141	ABLIM3
ENSG00000161955	0.00226577	5.09276	27.3367	3.43912e-150	6.68179e-149	328.606	TNFSF13
ENSG00000170144	-0.000986052	6.85712	-27.3339	3.66113e-150	7.10358e-149	328.538	HNRNPA3
ENSG00000022277	0.00185712	6.74942	27.322	4.80632e-150	9.31304e-149	328.278	RTFDC1
ENSG00000119655	0.00187787	5.84216	27.3213	4.8833e-150	9.44955e-149	328.239	NPC2
ENSG00000106665	0.00223073	2.31502	27.3183	5.23552e-150	1.01176e-148	328.623	CLIP2
ENSG00000198373	0.00165865	6.07712	27.3172	5.36524e-150	1.03544e-148	328.146	WWP2
ENSG00000176624	-0.00149894	6.11684	-27.314	5.77195e-150	1.11245e-148	328.092	MEX3C
ENSG00000142657	0.00300978	7.45867	27.305	7.09379e-150	1.36539e-148	327.948	PGD
ENSG00000136630	0.00312499	3.95186	27.2956	8.77148e-150	1.68606e-148	327.765	HLX
ENSG00000013375	-0.00155324	4.19906	-27.292	9.53695e-150	1.83076e-148	327.796	PGM3
ENSG00000260916	0.00216754	7.75522	27.2917	9.60418e-150	1.84123e-148	327.653	CCPG1
ENSG00000144741	-0.00184286	3.56881	-27.2895	1.00847e-149	1.93078e-148	327.879	SLC25A26
ENSG00000149474	-0.00151232	4.34361	-27.2872	1.06231e-149	2.03118e-148	327.658	KAT14
ENSG00000174903	0.00172922	4.83778	27.2852	1.11229e-149	2.12393e-148	327.459	RAB1B
ENSG00000198053	0.00297286	6.43653	27.2803	1.24535e-149	2.37486e-148	327.327	SIRPA
ENSG00000185215	0.00262057	7.62403	27.2751	1.40236e-149	2.67076e-148	327.272	TNFAIP2
ENSG00000008130	0.00282839	7.60932	27.274	1.43673e-149	2.73262e-148	327.249	NADK
ENSG00000162086	-0.00155458	4.86927	-27.2716	1.51896e-149	2.88523e-148	327.222	ZNF75A
ENSG00000167193	0.00146441	5.94004	27.2597	1.99215e-149	3.77906e-148	326.829	CRK
ENSG00000115318	0.00252507	2.39434	27.2593	2.00678e-149	3.80184e-148	327.238	LOXL3
ENSG00000005801	-0.00165407	4.88931	-27.2544	2.24643e-149	4.25027e-148	326.833	ZNF195
ENSG00000169180	0.0025259	8.73884	27.2525	2.34225e-149	4.42577e-148	326.84	XPO6
ENSG00000168827	-0.00109393	5.29494	-27.2512	2.41574e-149	4.55869e-148	326.697	GFM1
ENSG00000144677	0.00427604	3.0569	27.2503	2.46764e-149	4.65055e-148	326.858	CTDSPL
ENSG00000135372	-0.00142853	4.59272	-27.2459	2.72189e-149	5.12303e-148	326.674	NAT10
ENSG00000171827	-0.00186562	3.59114	-27.2451	2.77791e-149	5.22168e-148	326.863	ZNF570
ENSG00000163946	-0.000833362	7.05305	-27.2445	2.81102e-149	5.27704e-148	326.506	FAM208A
ENSG00000105397	0.00158623	7.13524	27.2408	3.06037e-149	5.7377e-148	326.449	TYK2
ENSG00000088205	-0.00108453	6.11989	-27.2352	3.47897e-149	6.51405e-148	326.289	DDX18
ENSG00000213782	-0.00125881	4.80374	-27.2336	3.60426e-149	6.73991e-148	326.358	DDX47
ENSG00000129657	0.00308034	8.24836	27.2178	5.16042e-149	9.63746e-148	326.024	SEC14L1
ENSG00000213903	0.00270997	5.40374	27.1963	8.43209e-149	1.57272e-147	325.401	LTB4R
ENSG00000144711	0.00167897	7.12354	27.1948	8.71601e-149	1.62358e-147	325.401	IQSEC1
ENSG00000163812	0.00118969	6.3786	27.1815	1.17827e-148	2.192e-147	325.06	ZDHHC3
ENSG00000116584	0.00131645	7.16696	27.1796	1.23103e-148	2.28722e-147	325.054	ARHGEF2
ENSG00000090238	0.00281992	5.87336	27.1719	1.46695e-148	2.72205e-147	324.864	YPEL3
ENSG00000105514	0.00293119	6.51941	27.1702	1.524e-148	2.82429e-147	324.829	RAB3D
ENSG00000137038	-0.00209216	3.54771	-27.1631	1.79154e-148	3.31584e-147	325.016	TMEM261
ENSG00000106780	0.00283987	7.95961	27.1614	1.86123e-148	3.44042e-147	324.718	MEGF9
ENSG00000175137	0.0019776	5.90995	27.1602	1.9131e-148	3.53178e-147	324.58	SH3BP5L
ENSG00000145819	0.00228974	8.07116	27.1533	2.23935e-148	4.12881e-147	324.532	ARHGAP26
ENSG00000165233	0.00189254	3.93385	27.1524	2.28326e-148	4.2044e-147	324.545	CARD19
ENSG00000117620	-0.00151433	4.97501	-27.1511	2.35549e-148	4.33188e-147	324.475	SLC35A3
ENSG00000118420	-0.00239112	2.76221	-27.1491	2.46365e-148	4.52504e-147	324.916	UBE3D
ENSG00000009790	-0.00118499	7.29864	-27.1484	2.50223e-148	4.59007e-147	324.332	TRAF3IP3
ENSG00000197050	-0.0021364	3.50843	-27.1468	2.59398e-148	4.75234e-147	324.656	ZNF420
ENSG00000148358	0.00118852	5.32181	27.1406	2.98578e-148	5.46321e-147	324.137	GPR107
ENSG00000156239	-0.00219287	3.75676	-27.1369	3.2514e-148	5.94172e-147	324.384	N6AMT1
ENSG00000137393	0.002566	6.5034	27.1335	3.50806e-148	6.40266e-147	323.99	RNF144B
ENSG00000118263	0.00182076	5.97369	27.1298	3.82272e-148	6.96815e-147	323.883	KLF7
ENSG00000161013	0.00143199	4.68043	27.114	5.4633e-148	9.94609e-147	323.587	MGAT4B
ENSG00000185379	-0.00167166	4.11268	-27.1119	5.73064e-148	1.04197e-146	323.718	RAD51D
ENSG00000028203	-0.0013355	4.84741	-27.104	6.86162e-148	1.24604e-146	323.411	VEZT
ENSG00000103494	-0.00264795	2.26629	-27.0993	7.63511e-148	1.38476e-146	323.922	RPGRIP1L
ENSG00000100605	0.0026146	6.13117	27.0963	8.17407e-148	1.48065e-146	323.14	ITPK1
ENSG00000135506	0.00163995	6.70417	27.0938	8.64917e-148	1.56287e-146	323.087	OS9
ENSG00000106829	0.00152641	6.71625	27.0938	8.64958e-148	1.56287e-146	323.085	TLE4
ENSG00000005893	0.00239145	8.16027	27.0873	1.00255e-147	1.80922e-146	323.042	LAMP2
ENSG00000213741	-0.00279965	6.38986	-27.083	1.10506e-147	1.99173e-146	322.862	RPS29
ENSG00000268027	-0.0031023	3.41507	-27.0823	1.12325e-147	2.02199e-146	323.253
ENSG00000083223	0.00205425	8.37064	27.0761	1.29292e-147	2.32453e-146	322.8	ZCCHC6
ENSG00000160883	0.00273311	6.77686	27.0674	1.57191e-147	2.82261e-146	322.515	HK3
ENSG00000187699	0.00388566	4.66166	27.0561	2.03081e-147	3.6421e-146	322.274	C2orf88
ENSG00000147394	0.0034065	4.79303	27.0494	2.36495e-147	4.2361e-146	322.098	ZNF185
ENSG00000188283	-0.00156827	4.05874	-27.0492	2.37624e-147	4.25106e-146	322.31	ZNF383
ENSG00000131759	0.00269554	5.16189	27.0467	2.51262e-147	4.48949e-146	322.031	RARA
ENSG00000111859	0.0020232	6.83876	27.0454	2.58788e-147	4.61825e-146	322.003	NEDD9
ENSG00000033627	0.00181717	5.03866	27.0436	2.69733e-147	4.80764e-146	321.948	ATP6V0A1
ENSG00000197461	0.00359562	1.67901	27.0414	2.83381e-147	5.04467e-146	322.379	PDGFA
ENSG00000198478	0.00484294	5.33041	27.0319	3.51724e-147	6.2536e-146	321.702	SH3BGRL2
ENSG00000167461	0.00129256	5.64155	27.027	3.93407e-147	6.98611e-146	321.553	RAB8A
ENSG00000165025	0.0020498	7.98038	27.0128	5.41704e-147	9.60777e-146	321.339	SYK
ENSG00000177954	-0.00392967	7.65445	-27.0089	5.91922e-147	1.04856e-145	321.211	RPS27
ENSG00000213186	-0.00209598	3.77293	-27.0025	6.84375e-147	1.21085e-145	321.327	TRIM59
ENSG00000165322	-0.00150583	5.20145	-26.9941	8.27635e-147	1.46253e-145	320.891	ARHGAP12
ENSG00000130066	0.00226603	7.98694	26.9901	9.06515e-147	1.59996e-145	320.83	SAT1
ENSG00000163785	-0.00121477	5.0471	-26.9882	9.46203e-147	1.66797e-145	320.764	RYK
ENSG00000189042	-0.00209395	3.4492	-26.9838	1.0459e-146	1.84147e-145	320.975	ZNF567
ENSG00000123836	0.00283178	4.56794	26.9831	1.06182e-146	1.86724e-145	320.607	PFKFB2
ENSG00000088298	0.00134799	5.02878	26.9787	1.17293e-146	2.0601e-145	320.49	EDEM2
ENSG00000102144	0.00139809	8.43037	26.9757	1.25432e-146	2.20039e-145	320.525	PGK1
ENSG00000122417	-0.00184399	5.43514	-26.9748	1.27958e-146	2.24198e-145	320.448	ODF2L
ENSG00000213625	0.001587	5.15974	26.9748	1.28172e-146	2.24301e-145	320.387	LEPROT
ENSG00000128311	0.00272549	3.41369	26.9689	1.46432e-146	2.55946e-145	320.439	TST
ENSG00000176994	0.00094493	6.48938	26.9654	1.58551e-146	2.76794e-145	320.166	SMCR8
ENSG00000142892	-0.00153967	4.47421	-26.9624	1.69662e-146	2.95834e-145	320.275	PIGK
ENSG00000120805	-0.00157485	4.0785	-26.9586	1.84904e-146	3.22023e-145	320.255	ARL1
ENSG00000116017	0.00251924	4.96365	26.9576	1.88924e-146	3.28627e-145	320.017	ARID3A
ENSG00000163811	-0.00138325	5.09858	-26.9544	2.03344e-146	3.53286e-145	320.003	WDR43
ENSG00000011422	0.00299589	5.48286	26.9515	2.16912e-146	3.76405e-145	319.86	PLAUR
ENSG00000167842	-0.00157532	4.06039	-26.9452	2.50072e-146	4.33428e-145	319.957	MIS12
ENSG00000002919	0.00188195	4.73827	26.944	2.57157e-146	4.45173e-145	319.717	SNX11
ENSG00000140718	-0.00136433	5.16943	-26.9358	3.09606e-146	5.3533e-145	319.567	FTO
ENSG00000128000	-0.0015629	6.10731	-26.9351	3.14046e-146	5.42358e-145	319.507	ZNF780B
ENSG00000061918	0.00357625	3.01975	26.9316	3.4036e-146	5.871e-145	319.649	GUCY1B3
ENSG00000120686	-0.00133566	5.33056	-26.9294	3.57619e-146	6.16136e-145	319.423	UFM1
ENSG00000089902	0.00193077	5.72693	26.9292	3.5887e-146	6.17555e-145	319.346	RCOR1
ENSG00000170846	-0.00193304	4.0442	-26.9196	4.46046e-146	7.66659e-145	319.397
ENSG00000072864	0.00173997	5.92034	26.9157	4.87233e-146	8.36454e-145	319.039	NDE1
ENSG00000136867	0.00308133	6.36774	26.9121	5.27939e-146	9.05262e-145	318.981	SLC31A2
ENSG00000143418	0.00133031	6.3974	26.9096	5.59413e-146	9.58094e-145	318.907	CERS2
ENSG00000185909	0.00340752	2.68438	26.9076	5.84446e-146	9.99783e-145	319.16	KLHDC8B
ENSG00000111875	-0.00170363	4.42082	-26.907	5.9258e-146	1.0125e-144	319.036	ASF1A
ENSG00000100578	-0.00106901	5.62702	-26.9018	6.66345e-146	1.13719e-144	318.759	KIAA0586
ENSG00000101265	0.00258081	9.63327	26.9014	6.73033e-146	1.14725e-144	318.956	RASSF2
ENSG00000140455	0.0011355	7.04692	26.8939	7.97362e-146	1.35758e-144	318.578	USP3
ENSG00000108774	0.00191797	5.74667	26.8844	9.86737e-146	1.67803e-144	318.339	RAB5C
ENSG00000112118	-0.0013373	5.09619	-26.8771	1.16399e-145	1.97714e-144	318.255	MCM3
ENSG00000070882	-0.00186208	5.15127	-26.8743	1.2401e-145	2.10394e-144	318.195	OSBPL3
ENSG00000111321	0.0023958	4.26357	26.8705	1.35247e-145	2.29191e-144	318.105	LTBR
ENSG00000169567	-0.00244791	4.86955	-26.8701	1.36499e-145	2.31041e-144	318.153	HINT1
ENSG00000172159	0.00306017	2.61779	26.864	1.5637e-145	2.64367e-144	318.209	FRMD3
ENSG00000107736	0.00225717	5.56246	26.8604	1.69752e-145	2.86654e-144	317.8	CDH23
ENSG00000131724	0.0031718	6.88596	26.855	1.91595e-145	3.23163e-144	317.721	IL13RA1
ENSG00000171700	0.00191165	5.84523	26.8537	1.97545e-145	3.3281e-144	317.652	RGS19
ENSG00000169403	0.00303106	8.09919	26.8441	2.44854e-145	4.12033e-144	317.554	PTAFR
ENSG00000079785	-0.00126969	5.10446	-26.8399	2.69331e-145	4.52695e-144	317.413	DDX1
ENSG00000139178	0.00222559	5.27786	26.8382	2.8029e-145	4.70568e-144	317.301	C1RL
ENSG00000066084	0.00184227	7.50703	26.8351	3.00073e-145	5.03197e-144	317.291	DIP2B
ENSG00000221869	0.00337858	5.55402	26.8345	3.04633e-145	5.10188e-144	317.227	CEBPD
ENSG00000177666	0.00212216	4.02068	26.8344	3.04948e-145	5.10188e-144	317.331	PNPLA2
ENSG00000001561	-0.00290166	4.35495	-26.8343	3.05772e-145	5.10975e-144	317.438	ENPP4
ENSG00000174206	-0.00201964	3.30824	-26.833	3.14575e-145	5.25078e-144	317.619	C12orf66
ENSG00000071127	0.00132688	8.02087	26.826	3.68587e-145	6.14524e-144	317.115	WDR1
ENSG00000117090	-0.00254455	4.32534	-26.8207	4.15667e-145	6.9222e-144	317.137	SLAMF1
ENSG00000134686	0.00365059	6.34098	26.8178	4.43376e-145	7.37515e-144	316.864	PHC2
ENSG00000136937	-0.000952928	5.68495	-26.8087	5.43711e-145	9.03373e-144	316.656	NCBP1
ENSG00000153310	0.00160428	7.79403	26.808	5.52702e-145	9.17257e-144	316.7	FAM49B
ENSG00000073910	0.00212376	7.90246	26.8049	5.927e-145	9.8251e-144	316.644	FRY
ENSG00000130338	-0.00175515	4.98269	-26.8044	5.99642e-145	9.92879e-144	316.639	TULP4
ENSG00000196262	-0.00131839	7.5763	-26.8017	6.37909e-145	1.05503e-143	316.51	PPIA
ENSG00000168234	-0.00188303	5.43489	-26.8014	6.42121e-145	1.06078e-143	316.529	TTC39C
ENSG00000140479	0.00428717	2.37548	26.7897	8.34809e-145	1.37753e-143	316.55	PCSK6
ENSG00000020426	-0.00210947	3.01422	-26.7888	8.52167e-145	1.40457e-143	316.693	MNAT1
ENSG00000168256	0.00133311	4.01969	26.7886	8.55828e-145	1.409e-143	316.314	NKIRAS2
ENSG00000173638	0.00281072	5.12735	26.7836	9.58265e-145	1.57585e-143	316.101	SLC19A1
ENSG00000188315	0.00227215	4.6503	26.7808	1.02101e-144	1.67712e-143	316.045	C3orf62
ENSG00000124126	0.00261328	8.87572	26.7764	1.12714e-144	1.84935e-143	316.08	PREX1
ENSG00000143549	0.00114112	8.63795	26.7694	1.31779e-144	2.15972e-143	315.888	TPM3
ENSG00000114735	-0.00162813	4.83352	-26.7692	1.32548e-144	2.16985e-143	315.863	HEMK1
ENSG00000120709	0.00250598	5.65832	26.7677	1.37004e-144	2.24026e-143	315.711	FAM53C
ENSG00000110934	0.00139038	8.05134	26.7673	1.3816e-144	2.25661e-143	315.801	BIN2
ENSG00000215158	-0.00186574	4.9665	-26.7626	1.53651e-144	2.50681e-143	315.704
ENSG00000119801	0.00140029	6.72029	26.7551	1.81862e-144	2.96371e-143	315.444	YPEL5
ENSG00000136238	0.00170286	6.81469	26.7532	1.89785e-144	3.08936e-143	315.409	RAC1
ENSG00000136021	0.00112304	6.3782	26.7521	1.94722e-144	3.16616e-143	315.362	SCYL2
ENSG00000160570	0.0018778	5.70314	26.7501	2.03425e-144	3.30395e-143	315.323	DEDD2
ENSG00000085514	0.00266796	4.5828	26.7491	2.08241e-144	3.37836e-143	315.343	PILRA
ENSG00000167995	0.00298807	5.29646	26.7476	2.15381e-144	3.49028e-143	315.267	BEST1
ENSG00000166716	0.0012516	5.72693	26.7395	2.58431e-144	4.18323e-143	315.073	ZNF592
ENSG00000100697	0.00159126	8.21725	26.7357	2.81131e-144	4.54559e-143	315.104	DICER1
ENSG00000147364	-0.00153336	4.33454	-26.7347	2.88108e-144	4.65318e-143	315.163	FBXO25
ENSG00000267322	-0.00255141	6.00827	-26.7322	3.04391e-144	4.91069e-143	314.962	SNHG22
ENSG00000135503	0.00177554	3.94581	26.7278	3.36105e-144	5.41627e-143	314.947	ACVR1B
ENSG00000171824	-0.00101726	5.30113	-26.7271	3.41225e-144	5.49266e-143	314.849	EXOSC10
ENSG00000138443	-0.00182697	4.32618	-26.726	3.49739e-144	5.62345e-143	314.982	ABI2
ENSG00000119522	0.00168187	5.0079	26.721	3.91365e-144	6.28575e-143	314.68	DENND1A
ENSG00000157557	0.00270011	5.95794	26.7095	5.07338e-144	8.13936e-143	314.405	ETS2
ENSG00000030066	-0.00102465	5.74715	-26.7058	5.50647e-144	8.82439e-143	314.34	NUP160
ENSG00000140995	0.00218628	6.40217	26.7045	5.67246e-144	9.08034e-143	314.305	DEF8
ENSG00000185950	0.00293932	4.8555	26.704	5.74116e-144	9.18014e-143	314.303	IRS2
ENSG00000099875	0.00201772	6.17117	26.7014	6.08065e-144	9.71224e-143	314.235	MKNK2
ENSG00000182831	0.00136849	8.80544	26.6951	7.00909e-144	1.11828e-142	314.233	C16orf72
ENSG00000176055	-0.00225248	2.89453	-26.6925	7.4337e-144	1.18472e-142	314.561	MBLAC2
ENSG00000259494	-0.00191503	3.62346	-26.6892	7.99421e-144	1.27265e-142	314.302	MRPL46
ENSG00000169891	0.00337224	5.84798	26.688	8.21174e-144	1.30584e-142	313.935	REPS2
ENSG00000107341	0.00203658	5.73555	26.6781	1.02697e-143	1.63131e-142	313.694	UBE2R2
ENSG00000248124	-0.00253596	3.833	-26.6775	1.03965e-143	1.64963e-142	314.015	RRN3P1
ENSG00000177885	0.0018596	7.87508	26.6756	1.08502e-143	1.71973e-142	313.735	GRB2
ENSG00000111252	0.00141774	6.18623	26.6753	1.09337e-143	1.73107e-142	313.634	SH2B3
ENSG00000163625	0.003122	8.06879	26.6693	1.2509e-143	1.97831e-142	313.625	WDFY3
ENSG00000135272	-0.00172371	5.92405	-26.6682	1.28332e-143	2.02736e-142	313.511	MDFIC
ENSG00000125485	-0.00190667	3.41265	-26.6674	1.30595e-143	2.06087e-142	313.868	DDX31
ENSG00000130844	-0.00213994	3.59079	-26.6553	1.71412e-143	2.70203e-142	313.559	ZNF331
ENSG00000111424	0.00243563	3.01258	26.6491	1.96807e-143	3.09896e-142	313.328	VDR
ENSG00000142687	0.00152635	5.60014	26.6479	2.02107e-143	3.17895e-142	313.019	KIAA0319L
ENSG00000168310	0.00160921	5.42023	26.6438	2.21836e-143	3.48548e-142	312.928	IRF2
ENSG00000140396	0.00156118	7.8022	26.6429	2.26341e-143	3.55241e-142	312.99	NCOA2
ENSG00000171262	-0.00192463	3.66961	-26.6357	2.65844e-143	4.16788e-142	313.091	FAM98B
ENSG00000171456	-0.0010148	5.94588	-26.6301	3.01474e-143	4.72135e-142	312.632	ASXL1
ENSG00000001461	-0.00151509	5.6944	-26.624	3.45423e-143	5.40377e-142	312.52	NIPAL3
ENSG00000160685	0.00193709	6.07084	26.6237	3.48251e-143	5.44212e-142	312.492	ZBTB7B
ENSG00000134830	0.00291413	6.66618	26.6235	3.49385e-143	5.45395e-142	312.504	C5AR2
ENSG00000109743	0.00277164	5.75869	26.6192	3.8442e-143	5.99437e-142	312.383	BST1
ENSG00000132912	0.00133241	5.77309	26.6183	3.92822e-143	6.11879e-142	312.352	DCTN4
ENSG00000109911	-0.0014993	5.32229	-26.6158	4.14864e-143	6.45517e-142	312.375	ELP4
ENSG00000117676	0.00190195	7.48188	26.6152	4.2102e-143	6.54393e-142	312.353	RPS6KA1
ENSG00000121316	0.00308451	7.72032	26.6128	4.4418e-143	6.89648e-142	312.336	PLBD1
ENSG00000012232	0.00234384	5.93983	26.6118	4.54431e-143	7.04807e-142	312.213	EXTL3
ENSG00000155926	0.00216332	8.66737	26.6051	5.27648e-143	8.17487e-142	312.218	SLA
ENSG00000164172	-0.00211939	2.94682	-26.6051	5.28458e-143	8.17865e-142	312.584	MOCS2
ENSG00000100461	0.00167255	6.8134	26.6046	5.34079e-143	8.2568e-142	312.072	RBM23
ENSG00000057935	-0.00213052	3.14466	-26.5968	6.36403e-143	9.82822e-142	312.362	MTA3
ENSG00000166681	0.00295758	2.98383	26.5846	8.35038e-143	1.2882e-141	311.875	BEX3
ENSG00000152465	-0.00232358	4.41188	-26.5837	8.5342e-143	1.31516e-141	311.798	NMT2
ENSG00000185591	0.00159075	7.73038	26.5719	1.11026e-142	1.70914e-141	311.398	SP1
ENSG00000133318	0.00241553	6.76627	26.5633	1.34497e-142	2.06825e-141	311.16	RTN3
ENSG00000120458	-0.00175432	3.7439	-26.562	1.38509e-142	2.12769e-141	311.42	MSANTD2
ENSG00000011198	0.00303138	7.19851	26.56	1.45025e-142	2.22542e-141	311.115	ABHD5
ENSG00000133812	0.00192053	6.59912	26.5588	1.48798e-142	2.28088e-141	311.043	SBF2
ENSG00000161298	-0.00262899	2.97591	-26.5569	1.55314e-142	2.37825e-141	311.525	ZNF382
ENSG00000023902	0.0014854	6.66908	26.5547	1.63057e-142	2.49416e-141	310.95	PLEKHO1
ENSG00000131876	-0.00179874	3.94487	-26.554	1.65673e-142	2.5315e-141	311.198	SNRPA1
ENSG00000095319	-0.001367	4.62179	-26.5539	1.65985e-142	2.53359e-141	311.058	NUP188
ENSG00000140564	0.0032439	5.67507	26.5537	1.67066e-142	2.54741e-141	310.947	FURIN
ENSG00000147854	-0.0011371	6.44285	-26.552	1.73212e-142	2.63833e-141	310.884	UHRF2
ENSG00000119862	0.00346105	4.11672	26.5506	1.78767e-142	2.72008e-141	310.934	LGALSL
ENSG00000188786	0.00158185	5.33428	26.5491	1.85058e-142	2.81285e-141	310.812	MTF1
ENSG00000136527	-0.000947323	7.55133	-26.5453	2.01254e-142	3.05581e-141	310.761	TRA2B
ENSG00000167526	-0.00148787	8.9116	-26.5449	2.03181e-142	3.08182e-141	310.832	RPL13
ENSG00000163694	0.00305169	6.31697	26.5431	2.11788e-142	3.20901e-141	310.691	RBM47
ENSG00000156162	-0.00197095	3.66238	-26.5423	2.15359e-142	3.2597e-141	311.003	DPY19L4
ENSG00000185963	0.00159241	6.47148	26.539	2.32069e-142	3.50895e-141	310.59	BICD2
ENSG00000119927	-0.00177721	3.69838	-26.5345	2.56529e-142	3.87474e-141	310.817	GPAM
ENSG00000180626	-0.00245248	4.30288	-26.5286	2.92499e-142	4.41344e-141	310.586	ZNF594
ENSG00000185418	-0.00175039	4.22933	-26.5206	3.50224e-142	5.27892e-141	310.397	TARSL2
ENSG00000075624	0.00190145	10.6466	26.5179	3.71664e-142	5.59625e-141	310.422	ACTB
ENSG00000073921	0.00186844	9.09233	26.5141	4.04306e-142	6.08142e-141	310.215	PICALM
ENSG00000150457	0.00193539	4.08524	26.5121	4.23122e-142	6.35783e-141	310.093	LATS2
ENSG00000177932	-0.0021508	3.87061	-26.5096	4.47454e-142	6.71646e-141	310.24	ZNF354C
ENSG00000109929	-0.00183716	4.03109	-26.5026	5.2369e-142	7.85264e-141	310.033	SC5D
ENSG00000166888	0.00174044	7.91058	26.4976	5.8487e-142	8.76092e-141	309.752	STAT6
ENSG00000116754	-0.00104538	7.24789	-26.4931	6.46861e-142	9.67948e-141	309.583	SRSF11
ENSG00000154310	-0.00156253	5.99958	-26.4849	7.77189e-142	1.16176e-140	309.394	TNIK
ENSG00000137177	0.00267932	6.51074	26.4721	1.03349e-141	1.5433e-140	309.113	KIF13A
ENSG00000184678	0.0017751	6.07588	26.4716	1.04551e-141	1.55964e-140	309.082	HIST2H2BE
ENSG00000248049	-0.00216946	3.72038	-26.471	1.0609e-141	1.58096e-140	309.407	UBA6-AS1
ENSG00000234663	-0.00320646	3.82644	-26.4692	1.10496e-141	1.64493e-140	309.377
ENSG00000081059	-0.00270215	5.90954	-26.4647	1.22099e-141	1.81578e-140	308.982	TCF7
ENSG00000155465	0.00209868	6.32157	26.4602	1.34936e-141	2.00462e-140	308.835	SLC7A7
ENSG00000076513	0.00183986	7.95993	26.4501	1.69103e-141	2.50964e-140	308.698	ANKRD13A
ENSG00000167553	0.00189823	4.7154	26.445	1.89584e-141	2.8107e-140	308.527	TUBA1C
ENSG00000156599	0.000872083	6.14978	26.4397	2.13335e-141	3.15959e-140	308.36	ZDHHC5
ENSG00000163714	-0.000924368	6.82596	-26.4342	2.41203e-141	3.56867e-140	308.255	U2SURP
ENSG00000178338	-0.00208882	3.38049	-26.4337	2.43649e-141	3.60117e-140	308.651	ZNF354B
ENSG00000124243	-0.00302952	3.35705	-26.4317	2.5483e-141	3.76259e-140	308.648	BCAS4
ENSG00000100991	0.00115667	6.5719	26.4309	2.59497e-141	3.82758e-140	308.177	TRPC4AP
ENSG00000149136	-0.00115719	5.0349	-26.4298	2.65727e-141	3.91548e-140	308.229	SSRP1
ENSG00000132471	0.00270056	5.33106	26.428	2.76588e-141	4.07136e-140	308.129	WBP2
ENSG00000053918	0.00175991	4.30428	26.4239	3.03605e-141	4.46451e-140	308.116	KCNQ1
ENSG00000136045	-0.00136886	4.55331	-26.4223	3.14438e-141	4.61911e-140	308.133	PWP1
ENSG00000079616	-0.00151299	4.53032	-26.4192	3.36751e-141	4.94186e-140	308.073	KIF22
ENSG00000164934	-0.00153931	4.46482	-26.4168	3.55274e-141	5.2084e-140	308.032	DCAF13
ENSG00000156931	0.00144126	7.43638	26.4103	4.10647e-141	6.01409e-140	307.768	VPS8
ENSG00000276649	0.00269879	2.55233	26.4102	4.11878e-141	6.02601e-140	308.085
ENSG00000197372	-0.00216529	3.87486	-26.4069	4.42749e-141	6.47112e-140	307.943	ZNF675
ENSG00000137076	0.00244083	8.92317	26.4054	4.57884e-141	6.68557e-140	307.783	TLN1
ENSG00000093183	-0.00123021	5.10087	-26.4043	4.69718e-141	6.85144e-140	307.655	SEC22C
ENSG00000196284	-0.00282895	2.78716	-26.4029	4.8493e-141	7.06619e-140	308.138	SUPT3H
ENSG00000132286	-0.00139933	4.43399	-26.4005	5.11197e-141	7.44144e-140	307.664	TIMM10B
ENSG00000005339	0.00152561	6.45711	26.4004	5.12816e-141	7.4575e-140	307.499	CREBBP
ENSG00000103047	-0.00122386	5.10697	-26.3994	5.24008e-141	7.61261e-140	307.543	TANGO6
ENSG00000160208	-0.00159608	4.28444	-26.3914	6.26246e-141	9.08874e-140	307.502	RRP1B
ENSG00000108846	0.00394283	3.68657	26.3906	6.37673e-141	9.2453e-140	307.42	ABCC3
ENSG00000113742	0.00220059	6.9795	26.3803	8.01274e-141	1.16056e-139	307.086	CPEB4
ENSG00000256771	-0.00226619	3.74075	-26.3792	8.2161e-141	1.18883e-139	307.359	ZNF253
ENSG00000230606	-0.00280021	4.70173	-26.3762	8.78995e-141	1.27059e-139	307.133
ENSG00000188229	0.00192089	5.6915	26.3665	1.09011e-140	1.57418e-139	306.747	TUBB4B
ENSG00000123106	-0.00159361	4.79253	-26.3624	1.1936e-140	1.7219e-139	306.773	CCDC91
ENSG00000111328	0.00217145	3.84919	26.3603	1.25282e-140	1.80554e-139	306.735	CDK2AP1
ENSG00000189144	-0.00221679	2.96986	-26.3577	1.32536e-140	1.9063e-139	307.071	ZNF573
ENSG00000169860	0.00248788	2.2819	26.3577	1.32538e-140	1.9063e-139	306.978	P2RY1
ENSG00000068885	-0.00163155	4.26303	-26.3551	1.40597e-140	2.02021e-139	306.698	IFT80
ENSG00000127980	-0.00123287	4.93633	-26.3524	1.49246e-140	2.14235e-139	306.523	PEX1
ENSG00000177156	0.00315521	8.25373	26.3419	1.88674e-140	2.70564e-139	306.329	TALDO1
ENSG00000035928	-0.001006	5.75287	-26.3407	1.93818e-140	2.77665e-139	306.185	RFC1
ENSG00000122643	0.00180748	5.27458	26.3398	1.97408e-140	2.82527e-139	306.16	NT5C3A
ENSG00000160211	0.00244181	5.29015	26.3391	2.00857e-140	2.87179e-139	306.149	G6PD
ENSG00000103522	-0.00207002	4.14084	-26.3359	2.15769e-140	3.08195e-139	306.307	IL21R
ENSG00000137504	-0.00127735	6.61768	-26.3338	2.26043e-140	3.22551e-139	306.026	CREBZF
ENSG00000082996	0.00186656	7.05386	26.3313	2.38906e-140	3.4057e-139	305.994	RNF13
ENSG00000164181	0.00408034	3.41405	26.3285	2.54041e-140	3.61789e-139	306.079	ELOVL7
ENSG00000172354	0.00250813	6.38152	26.3253	2.73029e-140	3.88448e-139	305.849	GNB2
ENSG00000156273	0.00222513	8.72272	26.3149	3.43587e-140	4.88353e-139	305.753	BACH1
ENSG00000105372	-0.00138895	8.08933	-26.3083	3.98391e-140	5.65692e-139	305.511	RPS19
ENSG00000136709	-0.000835845	6.61899	-26.3073	4.06809e-140	5.77078e-139	305.426	WDR33
ENSG00000158195	0.00188475	6.39547	26.3056	4.2295e-140	5.99386e-139	305.397	WASF2
ENSG00000060491	0.00157842	6.22032	26.3038	4.40361e-140	6.23449e-139	305.362	OGFR
ENSG00000108175	0.00194179	4.73274	26.3031	4.47256e-140	6.32592e-139	305.374	ZMIZ1
ENSG00000132825	0.00186023	5.16039	26.3011	4.67361e-140	6.60382e-139	305.295	PPP1R3D
ENSG00000165832	-0.00174262	3.66992	-26.3001	4.77666e-140	6.74283e-139	305.599	TRUB1
ENSG00000147403	-0.00151818	8.76906	-26.2979	5.02034e-140	7.0799e-139	305.319	RPL10
ENSG00000128266	0.00405101	3.35195	26.2923	5.68764e-140	8.01315e-139	305.279	GNAZ
ENSG00000006007	0.00233835	5.98372	26.2921	5.71081e-140	8.03795e-139	305.089	GDE1
ENSG00000151746	-0.00236816	3.26514	-26.2899	5.99583e-140	8.43091e-139	305.493	BICD1
ENSG00000074416	0.00326415	2.61222	26.2894	6.05646e-140	8.50788e-139	305.344	MGLL
ENSG00000143384	0.00189522	10.5826	26.2882	6.22372e-140	8.73435e-139	305.299	MCL1
ENSG00000163312	-0.00136885	4.36386	-26.2876	6.31656e-140	8.85605e-139	305.167	HELQ
ENSG00000169442	-0.00316024	6.24329	-26.2856	6.5915e-140	9.23257e-139	304.992	CD52
ENSG00000116991	0.00396576	5.58016	26.2827	7.03217e-140	9.84027e-139	304.887	SIPA1L2
ENSG00000122482	-0.00125122	6.4073	-26.2802	7.4328e-140	1.03908e-138	304.835	ZNF644
ENSG00000089094	-0.00132628	4.53946	-26.2787	7.6863e-140	1.07348e-138	304.94	KDM2B
ENSG00000261371	0.00213622	8.3956	26.2771	7.96e-140	1.11064e-138	304.889	PECAM1
ENSG00000253719	-0.000912783	6.21471	-26.2767	8.03457e-140	1.11996e-138	304.746	ATXN7L3B
ENSG00000101557	-0.0016367	4.18834	-26.2741	8.50969e-140	1.18504e-138	304.91	USP14
ENSG00000082458	-0.00314469	2.71357	-26.2713	9.06892e-140	1.26171e-138	305.242	DLG3
ENSG00000163956	0.00150002	6.13741	26.2645	1.05501e-139	1.46637e-138	304.476	LRPAP1
ENSG00000197056	-0.00169984	3.90271	-26.2638	1.07094e-139	1.48707e-138	304.742	ZMYM1
ENSG00000119535	0.00312446	9.83347	26.2617	1.12142e-139	1.55568e-138	304.669	CSF3R
ENSG00000138029	0.00104762	6.25283	26.2608	1.14418e-139	1.58573e-138	304.386	HADHB
ENSG00000158773	0.00134994	6.28847	26.2468	1.56063e-139	2.16082e-138	304.081	USF1
ENSG00000160712	0.00253307	8.51481	26.2385	1.87908e-139	2.59924e-138	304.043	IL6R
ENSG00000168591	0.00147826	4.57745	26.2366	1.95809e-139	2.70595e-138	303.914	TMUB2
ENSG00000175455	-0.00145282	5.73662	-26.2344	2.05712e-139	2.84008e-138	303.836	CCDC14
ENSG00000124608	-0.0014145	3.81798	-26.2319	2.17547e-139	3.00061e-138	304.04	AARS2
ENSG00000269335	0.00161262	4.08583	26.2312	2.20978e-139	3.04503e-138	303.862	IKBKG
ENSG00000135870	0.00121519	7.60929	26.2251	2.53059e-139	3.48378e-138	303.661	RC3H1
ENSG00000197249	0.00296584	7.11047	26.2238	2.60534e-139	3.58327e-138	303.624	SERPINA1
ENSG00000204946	-0.00151441	4.15446	-26.2227	2.66616e-139	3.66343e-138	303.773	ZNF783
ENSG00000198755	-0.00164112	7.7969	-26.2206	2.79448e-139	3.83611e-138	303.547	RPL10A
ENSG00000127920	0.00381568	3.83761	26.2186	2.92107e-139	4.00608e-138	303.584	GNG11
ENSG00000174099	0.00285237	2.12409	26.2103	3.51305e-139	4.81338e-138	303.715	MSRB3
ENSG00000146802	-0.00123078	5.38573	-26.2055	3.90833e-139	5.3499e-138	303.222	TMEM168
ENSG00000158769	0.00239239	5.87488	26.2029	4.14065e-139	5.66255e-138	303.108	F11R
ENSG00000148288	0.00233846	4.37829	26.2013	4.2916e-139	5.86344e-138	303.14	GBGT1
ENSG00000178802	-0.00167439	4.13009	-26.1967	4.74447e-139	6.47605e-138	303.211	MPI
ENSG00000106608	-0.00140905	3.97334	-26.1956	4.86432e-139	6.63338e-138	303.206	URGCP
ENSG00000183283	0.00174218	8.48339	26.1931	5.1387e-139	7.00093e-138	303.027	DAZAP2
ENSG00000111640	0.00161677	9.25807	26.1931	5.14685e-139	7.00543e-138	303.081	GAPDH
ENSG00000120899	0.00138707	6.85161	26.1844	6.23471e-139	8.47816e-138	302.719	PTK2B
ENSG00000288156	0.00196325	4.90667	26.1813	6.67385e-139	9.06677e-138	302.662	NA
ENSG00000116750	-0.00136907	4.70468	-26.1758	7.54854e-139	1.02455e-137	302.643	UCHL5
ENSG00000122376	-0.001742	4.75951	-26.1752	7.65234e-139	1.03766e-137	302.632	FAM35A
ENSG00000197457	-0.00205108	4.2408	-26.1734	7.95021e-139	1.07704e-137	302.683	STMN3
ENSG00000157540	0.000919019	8.03823	26.173	8.0364e-139	1.0877e-137	302.532	DYRK1A
ENSG00000129450	0.0025907	5.24819	26.1705	8.49255e-139	1.14836e-137	302.399	SIGLEC9
ENSG00000101019	-0.00146722	4.45926	-26.169	8.77339e-139	1.18523e-137	302.525	UQCC1
ENSG00000100266	0.00263879	7.01783	26.1634	9.93633e-139	1.34108e-137	302.275	PACSIN2
ENSG00000112242	0.00195899	4.88488	26.1629	1.00331e-138	1.35287e-137	302.246	E2F3
ENSG00000140941	0.00174392	5.61303	26.1591	1.09122e-138	1.47005e-137	302.138	MAP1LC3B
ENSG00000000938	0.00206746	8.16758	26.1585	1.10585e-138	1.48837e-137	302.241	FGR
ENSG00000198453	-0.00212537	3.14362	-26.1541	1.21975e-138	1.64014e-137	302.503	ZNF568
ENSG00000125505	0.00299574	6.15613	26.1531	1.24786e-138	1.67638e-137	302.022	MBOAT7
ENSG00000145349	-0.00179071	5.5428	-26.1525	1.2641e-138	1.69661e-137	302.044	CAMK2D
ENSG00000172216	0.00264625	5.82845	26.1494	1.35282e-138	1.814e-137	301.931	CEBPB
ENSG00000139626	-0.00161258	6.13562	-26.1474	1.41426e-138	1.89464e-137	301.906	ITGB7
ENSG00000168610	0.00216531	7.77686	26.1449	1.49524e-138	2.00127e-137	301.912	STAT3
ENSG00000095787	0.00103438	7.66011	26.1422	1.58823e-138	2.12376e-137	301.829	WAC
ENSG00000173020	0.00132416	7.44261	26.1365	1.80181e-138	2.40714e-137	301.693	GRK2
ENSG00000087053	-0.00164743	4.06747	-26.1304	2.06434e-138	2.75531e-137	301.748	MTMR2
ENSG00000163600	-0.00278354	4.02469	-26.1287	2.14329e-138	2.85804e-137	301.774	ICOS
ENSG00000241839	0.0023411	6.35091	26.1223	2.46798e-138	3.28798e-137	301.337	PLEKHO2
ENSG00000091106	0.00260549	5.63118	26.1208	2.55336e-138	3.39861e-137	301.29	NLRC4
ENSG00000100106	0.00184945	5.22908	26.1183	2.69704e-138	3.58654e-137	301.255	TRIOBP
ENSG00000096968	0.00161288	7.33408	26.1106	3.19448e-138	4.24414e-137	301.119	JAK2
ENSG00000059728	0.00317857	9.20494	26.1049	3.62261e-138	4.80852e-137	301.151	MXD1
ENSG00000099331	0.00156916	7.12363	26.0969	4.32678e-138	5.73794e-137	300.801	MYO9B
ENSG00000122359	0.00146757	7.42169	26.0953	4.48453e-138	5.94169e-137	300.78	ANXA11
ENSG00000068366	0.00202463	7.15619	26.0939	4.62163e-138	6.11773e-137	300.743	ACSL4
ENSG00000137040	-0.00145991	5.37896	-26.0847	5.6691e-138	7.49742e-137	300.56	RANBP6
ENSG00000198932	-0.00268139	4.91392	-26.0844	5.70824e-138	7.54228e-137	300.636	GPRASP1
ENSG00000091317	0.00204896	8.4192	26.0819	6.03352e-138	7.96479e-137	300.565	CMTM6
ENSG00000134287	0.00150569	5.29842	26.0758	6.8955e-138	9.09438e-137	300.303	ARF3
ENSG00000100364	0.00174351	5.15452	26.0741	7.17052e-138	9.44849e-137	300.274	KIAA0930
ENSG00000019991	0.00229577	3.77261	26.0733	7.29025e-138	9.5975e-137	300.387	HGF
ENSG00000166272	0.00124956	5.86206	26.072	7.50277e-138	9.86829e-137	300.205	WBP1L
ENSG00000137161	0.00164029	5.64514	26.067	8.38323e-138	1.10163e-136	300.102	CNPY3
ENSG00000198900	0.00143486	5.94955	26.0631	9.12871e-138	1.19851e-136	300.012	TOP1
ENSG00000135404	0.00184393	6.33388	26.0514	1.18314e-137	1.55193e-136	299.764	CD63
ENSG00000138767	-0.00101212	7.43134	-26.0511	1.19105e-137	1.5609e-136	299.779	CNOT6L
ENSG00000113569	-0.00105695	5.2592	-26.0507	1.20166e-137	1.57337e-136	299.796	NUP155
ENSG00000087206	0.00149345	5.77289	26.047	1.30466e-137	1.70668e-136	299.652	UIMC1
ENSG00000137767	0.00204913	6.60204	26.0467	1.31195e-137	1.71467e-136	299.672	SQRDL
ENSG00000171488	-0.00142682	6.42854	-26.037	1.62593e-137	2.12311e-136	299.448	LRRC8C
ENSG00000155545	-0.00152172	4.36621	-26.036	1.66196e-137	2.1682e-136	299.612	MIER3
ENSG00000139173	-0.00319948	1.44873	-26.0346	1.71482e-137	2.23514e-136	300.347	TMEM117
ENSG00000196937	-0.00267123	3.81353	-26.0323	1.80533e-137	2.351e-136	299.667	FAM3C
ENSG00000187098	0.00251108	1.75347	26.0298	1.90817e-137	2.48269e-136	299.849	MITF
ENSG00000115840	-0.00128486	4.2438	-26.027	2.02643e-137	2.63418e-136	299.42	SLC25A12
ENSG00000119321	0.00133634	6.83471	26.0262	2.06526e-137	2.68224e-136	299.22	FKBP15
ENSG00000248323	0.00287932	7.60327	26.0232	2.20732e-137	2.86416e-136	299.22	LUCAT1
ENSG00000205189	-0.00187797	4.30873	-26.0201	2.36086e-137	3.06064e-136	299.289	ZBTB10
ENSG00000161638	0.00203331	6.87857	26.0107	2.90461e-137	3.7622e-136	298.89	ITGA5
ENSG00000146350	-0.00200289	3.67027	-26.0035	3.40863e-137	4.41108e-136	299.046	TBC1D32
ENSG00000145332	0.00181243	5.32432	26.0013	3.57571e-137	4.62315e-136	298.658	KLHL8
ENSG00000197894	-0.00141831	5.16517	-25.9961	4.01199e-137	5.18261e-136	298.615	ADH5
ENSG00000198169	-0.00173787	3.42124	-25.9956	4.05104e-137	5.22837e-136	298.923	ZNF251
ENSG00000087086	0.00267027	10.7904	25.9911	4.47348e-137	5.76843e-136	298.764	FTL
ENSG00000189362	-0.00214105	4.00679	-25.9906	4.52942e-137	5.83537e-136	298.698	NEMP2
ENSG00000134698	0.0020955	7.85925	25.9902	4.56838e-137	5.88031e-136	298.502	AGO4
ENSG00000259207	0.00626022	6.54588	25.9803	5.67983e-137	7.30445e-136	298.263	ITGB3
ENSG00000101236	0.00300358	6.75729	25.9768	6.13921e-137	7.8882e-136	298.153	RNF24
ENSG00000153071	0.00233229	3.50529	25.9698	7.16772e-137	9.20154e-136	298.148	DAB2
ENSG00000094916	-0.00158842	5.54484	-25.9563	9.64511e-137	1.23709e-135	297.709	CBX5
ENSG00000198223	0.00259119	6.00435	25.9541	1.01292e-136	1.29803e-135	297.616	CSF2RA
ENSG00000144567	0.0019898	6.51739	25.9533	1.02993e-136	1.31866e-135	297.614	FAM134A
ENSG00000107745	0.00143575	4.44612	25.9491	1.12923e-136	1.44451e-135	297.574	MICU1
ENSG00000171940	0.00143296	8.19506	25.936	1.50668e-136	1.92565e-135	297.324	ZNF217
ENSG00000117597	-0.00163065	4.81888	-25.9324	1.63345e-136	2.08583e-135	297.26	DIEXF
ENSG00000198948	0.00383638	4.71541	25.9321	1.64186e-136	2.09471e-135	297.178	MFAP3L
ENSG00000240303	-0.0021233	4.1251	-25.9321	1.64517e-136	2.09709e-135	297.382	ACAD11
ENSG00000135469	-0.00234143	2.3101	-25.9302	1.71417e-136	2.18312e-135	297.799	COQ10A
ENSG00000117906	-0.00197093	3.52724	-25.9287	1.77136e-136	2.25396e-135	297.423	RCN2
ENSG00000140992	0.00117868	5.55421	25.9276	1.81416e-136	2.30639e-135	297.03	PDPK1
ENSG00000039319	0.00174754	7.06822	25.9255	1.90149e-136	2.41529e-135	297.021	ZFYVE16
ENSG00000150681	0.00261362	6.95965	25.9248	1.92868e-136	2.44768e-135	297.019	RGS18
ENSG00000164116	0.00335134	3.37301	25.9226	2.02368e-136	2.56599e-135	297.112	GUCY1A3
ENSG00000134900	-0.0010383	7.09485	-25.9178	2.25341e-136	2.85478e-135	296.829	TPP2
ENSG00000100034	0.00245032	7.01277	25.9157	2.35845e-136	2.98524e-135	296.812	PPM1F
ENSG00000152133	-0.00195547	4.01987	-25.9142	2.43751e-136	3.08261e-135	297.001	GPATCH11
ENSG00000178562	-0.0026302	6.22738	-25.9051	2.97921e-136	3.76437e-135	296.574	CD28
ENSG00000163162	0.00250246	8.80055	25.9018	3.19991e-136	4.03971e-135	296.634	RNF149
ENSG00000006530	-0.00166821	4.88222	-25.9016	3.21391e-136	4.05384e-135	296.572	AGK
ENSG00000118454	-0.00139003	4.49543	-25.8928	3.89964e-136	4.9145e-135	296.429	ANKRD13C
ENSG00000006459	0.00150105	7.76739	25.8928	3.90646e-136	4.91881e-135	296.344	KDM7A
ENSG00000142784	0.00198451	5.55406	25.8906	4.10065e-136	5.15883e-135	296.221	WDTC1
ENSG00000114021	-0.00177086	4.10373	-25.8887	4.27282e-136	5.37075e-135	296.42	NIT2
ENSG00000033100	0.00117373	5.03633	25.8873	4.40763e-136	5.53539e-135	296.185	CHPF2
ENSG00000132849	-0.00220814	6.16182	-25.8812	5.03811e-136	6.3217e-135	296.041	PATJ
ENSG00000189007	-0.00213313	3.31603	-25.8797	5.20736e-136	6.5284e-135	296.414	ADAT2
ENSG00000104324	0.00221718	6.51719	25.877	5.51897e-136	6.91307e-135	295.934	CPQ
ENSG00000133131	-0.00218767	2.93211	-25.874	5.89577e-136	7.37864e-135	296.394	MORC4
ENSG00000084676	0.00174082	7.7561	25.8738	5.93222e-136	7.41784e-135	295.929	NCOA1
ENSG00000132485	-0.00145177	6.202	-25.8654	7.12464e-136	8.89515e-135	295.693	ZRANB2
ENSG00000151651	0.00238229	7.0783	25.8654	7.12596e-136	8.89515e-135	295.718	ADAM8
ENSG00000148411	0.00202183	5.52829	25.8643	7.29874e-136	9.10295e-135	295.645	NACC2
ENSG00000100393	0.00130675	6.62514	25.8549	8.97898e-136	1.11889e-134	295.444	EP300
ENSG00000049883	-0.00182527	3.56121	-25.8539	9.18284e-136	1.14331e-134	295.778	PTCD2
ENSG00000012779	0.00275701	7.65351	25.8465	1.07933e-135	1.34266e-134	295.337	ALOX5
ENSG00000185477	-0.00167575	7.2559	-25.8409	1.22171e-135	1.51847e-134	295.149	GPRIN3
ENSG00000183023	0.00282392	6.57913	25.8401	1.24233e-135	1.54278e-134	295.135	SLC8A1
ENSG00000074266	-0.00136384	4.46501	-25.8336	1.43315e-135	1.77821e-134	295.134	EED
ENSG00000165521	-0.00302494	3.01633	-25.832	1.4836e-135	1.83923e-134	295.479	EML5
ENSG00000277701	-0.00275856	4.65717	-25.83	1.55201e-135	1.9224e-134	295.068
ENSG00000075426	0.002523	6.50547	25.829	1.58436e-135	1.96078e-134	294.886	FOSL2
ENSG00000083845	-0.00171976	7.32612	-25.8276	1.63737e-135	2.02465e-134	294.875	RPS5
ENSG00000078902	0.00178047	4.53796	25.8221	1.84464e-135	2.279e-134	294.78	TOLLIP
ENSG00000108349	0.00174487	6.11965	25.819	1.97402e-135	2.43676e-134	294.647	CASC3
ENSG00000256594	-0.00169181	6.30579	-25.8153	2.14042e-135	2.63991e-134	294.584
ENSG00000121310	-0.00231629	4.00152	-25.8149	2.16197e-135	2.66422e-134	294.839	ECHDC2
ENSG00000184787	-0.00106924	6.12735	-25.8139	2.21158e-135	2.72303e-134	294.54	UBE2G2
ENSG00000070831	0.000921059	8.82099	25.8133	2.2395e-135	2.75506e-134	294.67	CDC42
ENSG00000088053	0.00382456	0.744316	25.8118	2.31363e-135	2.84383e-134	295.144	GP6
ENSG00000127663	0.00209883	6.20159	25.8071	2.56755e-135	3.15326e-134	294.395	KDM4B
ENSG00000136891	-0.00135453	4.42653	-25.8059	2.63306e-135	3.23098e-134	294.532	TEX10
ENSG00000171777	0.00273464	4.451	25.8043	2.72885e-135	3.34568e-134	294.389	RASGRP4
ENSG00000113048	-0.00124392	4.68796	-25.8012	2.91659e-135	3.57283e-134	294.385	MRPS27
ENSG00000112715	0.00227202	3.11147	25.7991	3.05752e-135	3.74229e-134	294.477	VEGFA
ENSG00000247626	-0.00178792	3.61738	-25.7957	3.29291e-135	4.02699e-134	294.49	MARS2
ENSG00000135040	-0.00121259	4.65588	-25.795	3.34828e-135	4.09125e-134	294.252	NAA35
ENSG00000123684	0.00169183	7.77727	25.7941	3.41293e-135	4.16671e-134	294.182	LPGAT1
ENSG00000161921	0.00287817	3.62433	25.7937	3.44073e-135	4.19711e-134	294.248	CXCL16
ENSG00000105373	-0.00168497	6.65143	-25.7917	3.59806e-135	4.38532e-134	294.08	GLTSCR2
ENSG00000285851	0.00197533	4.09283	25.7903	3.71049e-135	4.51854e-134	294.13	NA
ENSG00000086848	-0.00156259	3.67295	-25.7902	3.71946e-135	4.52565e-134	294.342	ALG9
ENSG00000110719	0.00208682	6.86897	25.7881	3.8896e-135	4.72869e-134	294.019	TCIRG1
ENSG00000066654	-0.000981349	6.16317	-25.7838	4.27946e-135	5.1979e-134	293.883	THUMPD1
ENSG00000161048	-0.00161584	3.62265	-25.7837	4.28274e-135	5.1979e-134	294.216	NAPEPLD
ENSG00000180488	-0.00128051	4.56129	-25.7804	4.60851e-135	5.5886e-134	293.952	FAM73A
ENSG00000229754	0.00399993	3.85324	25.7773	4.93536e-135	5.97994e-134	293.861	CXCR2P1
ENSG00000130703	0.00192264	6.57506	25.7731	5.41297e-135	6.55314e-134	293.652	OSBPL2
ENSG00000143363	0.00150372	4.62318	25.7727	5.44999e-135	6.59244e-134	293.683	PRUNE1
ENSG00000172340	-0.00136791	5.14426	-25.7725	5.47677e-135	6.61929e-134	293.707	SUCLG2
ENSG00000066336	0.00276998	5.18364	25.769	5.9198e-135	7.14876e-134	293.581	SPI1
ENSG00000169508	-0.00261854	5.50763	-25.7654	6.39823e-135	7.72006e-134	293.559	GPR183
ENSG00000108819	0.00159446	5.87796	25.7582	7.50195e-135	9.04426e-134	293.321	PPP1R9B
ENSG00000151413	-0.0021587	2.44036	-25.755	8.04599e-135	9.69207e-134	293.911	NUBPL
ENSG00000106070	0.00349778	2.74173	25.7436	1.0328e-134	1.24306e-133	293.28	GRB10
ENSG00000172071	-0.00144099	5.03556	-25.7434	1.03592e-134	1.24578e-133	293.085	EIF2AK3
ENSG00000213551	-0.00148043	4.17629	-25.7426	1.05525e-134	1.26797e-133	293.196	DNAJC9
ENSG00000171302	0.00203132	5.4568	25.7375	1.1803e-134	1.41705e-133	292.863	CANT1
ENSG00000010671	0.00143368	6.21372	25.7372	1.18815e-134	1.42528e-133	292.852	BTK
ENSG00000197555	0.00197093	6.99713	25.7346	1.2564e-134	1.50591e-133	292.833	SIPA1L1
ENSG00000108021	-0.000919606	6.79594	-25.7331	1.2981e-134	1.5546e-133	292.77	FAM208B
ENSG00000130956	-0.0024543	3.12899	-25.7311	1.35624e-134	1.62288e-133	293.222	HABP4
ENSG00000172936	0.00207057	6.21626	25.7284	1.4399e-134	1.72157e-133	292.667	MYD88
ENSG00000128383	0.00332078	6.89988	25.7257	1.52766e-134	1.82499e-133	292.649	APOBEC3A
ENSG00000180787	-0.00206044	3.38799	-25.7193	1.75768e-134	2.09804e-133	292.873	ZFP3
ENSG00000172243	0.00238185	7.81695	25.719	1.76747e-134	2.10799e-133	292.553	CLEC7A
ENSG00000132600	-0.00140198	4.11353	-25.7163	1.87715e-134	2.23695e-133	292.63	PRMT7
ENSG00000116044	0.00123552	6.48754	25.7126	2.03671e-134	2.42509e-133	292.319	NFE2L2
ENSG00000085382	-0.00157487	3.76989	-25.712	2.06359e-134	2.45508e-133	292.609	HACE1
ENSG00000071994	-0.00101603	5.56388	-25.71	2.1543e-134	2.56089e-133	292.293	PDCD2
ENSG00000108788	0.00118577	5.46047	25.7083	2.23702e-134	2.65703e-133	292.221	MLX
ENSG00000109586	0.00124303	5.41727	25.7069	2.30339e-134	2.73363e-133	292.197	GALNT7
ENSG00000008294	0.00167765	7.69396	25.7051	2.39888e-134	2.84461e-133	292.227	SPAG9
ENSG00000245848	0.00218473	4.85813	25.7015	2.5978e-134	3.07797e-133	292.108	CEBPA
ENSG00000109184	-0.00153811	4.23615	-25.7007	2.6383e-134	3.12339e-133	292.27	DCUN1D4
ENSG00000092871	0.001444	5.88524	25.698	2.80035e-134	3.31253e-133	291.992	RFFL
ENSG00000108840	0.00171443	4.97235	25.6967	2.88147e-134	3.40569e-133	292.007	HDAC5
ENSG00000204160	0.00276099	7.23684	25.6953	2.96891e-134	3.50618e-133	291.999	ZDHHC18
ENSG00000267554	-0.00273823	3.40839	-25.6912	3.24847e-134	3.83051e-133	292.28
ENSG00000197329	0.00256414	7.50154	25.6912	3.24884e-134	3.83051e-133	291.924	PELI1
ENSG00000170190	0.0022176	3.17623	25.69	3.33574e-134	3.92976e-133	292.093	SLC16A5
ENSG00000265625	0.0019291	3.24946	25.6834	3.85276e-134	4.53515e-133	291.939
ENSG00000116685	0.0015084	5.13686	25.6806	4.10309e-134	4.82589e-133	291.644	KIAA2013
ENSG00000168404	0.00177782	5.99103	25.6792	4.22482e-134	4.96502e-133	291.582	MLKL
ENSG00000143499	-0.00166478	4.72876	-25.6763	4.50103e-134	5.28533e-133	291.66	SMYD2
ENSG00000172432	0.00143557	4.6324	25.6751	4.62695e-134	5.42878e-133	291.552	GTPBP2
ENSG00000168228	-0.00174741	3.30655	-25.6728	4.86208e-134	5.70002e-133	291.87	ZCCHC4
ENSG00000134324	-0.00160022	5.74915	-25.6703	5.13849e-134	6.0192e-133	291.424	LPIN1
ENSG00000124214	0.00176506	5.44308	25.6647	5.80215e-134	6.7911e-133	291.273	STAU1
ENSG00000134815	0.00229958	5.52541	25.6614	6.24011e-134	7.2978e-133	291.208	DHX34
ENSG00000151693	0.00314128	1.44354	25.6566	6.9305e-134	8.09865e-133	291.673	ASAP2
ENSG00000129353	0.00202108	6.64188	25.6557	7.06509e-134	8.24566e-133	291.094	SLC44A2
ENSG00000119509	-0.00127243	4.61427	-25.6557	7.06771e-134	8.24566e-133	291.211	INVS
ENSG00000072110	0.00297477	7.15212	25.6543	7.28947e-134	8.49752e-133	291.099	ACTN1
ENSG00000232593	-0.0019371	4.46307	-25.654	7.33691e-134	8.54593e-133	291.227	KANTR
ENSG00000119682	0.00143744	6.92059	25.6489	8.20033e-134	9.54394e-133	290.948	AREL1
ENSG00000104442	-0.00137599	4.34395	-25.6487	8.23724e-134	9.57919e-133	291.112	ARMC1
ENSG00000089639	0.00196774	5.65897	25.6477	8.40649e-134	9.76815e-133	290.907	GMIP
ENSG00000162688	-0.00130932	4.78936	-25.6474	8.46986e-134	9.83388e-133	291.01	AGL
ENSG00000156675	0.00256273	8.32401	25.6455	8.83074e-134	1.02447e-132	290.985	RAB11FIP1
ENSG00000121350	-0.00159444	4.43727	-25.6425	9.42976e-134	1.09308e-132	290.969	PYROXD1
ENSG00000149177	0.00234076	8.46186	25.6413	9.66913e-134	1.11993e-132	290.903	PTPRJ
ENSG00000132824	0.00130063	6.96574	25.6403	9.88579e-134	1.14411e-132	290.764	SERINC3
ENSG00000204131	0.00222214	7.12279	25.6394	1.00914e-133	1.16697e-132	290.765	NHSL2
ENSG00000174125	0.00239092	8.50251	25.6375	1.05139e-133	1.21486e-132	290.822	TLR1
ENSG00000245680	-0.00177362	3.9486	-25.6313	1.20472e-133	1.39092e-132	290.815	ZNF585B
ENSG00000060971	0.00131994	5.65863	25.6236	1.42401e-133	1.64279e-132	290.371	ACAA1
ENSG00000006634	-0.00178095	3.42584	-25.6217	1.48535e-133	1.71218e-132	290.723	DBF4
ENSG00000123908	0.00168222	6.89599	25.6213	1.49835e-133	1.72578e-132	290.351	AGO2
ENSG00000243335	-0.00161681	5.2314	-25.6211	1.50336e-133	1.73018e-132	290.389	KCTD7
ENSG00000165819	-0.00116292	5.30091	-25.6108	1.88221e-133	2.16447e-132	290.146	METTL3
ENSG00000102921	0.00173983	6.51551	25.6103	1.90289e-133	2.1865e-132	290.092	N4BP1
ENSG00000064225	0.00226488	4.04963	25.6068	2.05751e-133	2.3623e-132	290.112	ST3GAL6
ENSG00000188167	0.00140161	4.07904	25.6001	2.3808e-133	2.7313e-132	289.987	TMPPE
ENSG00000157036	-0.00199273	3.14948	-25.5994	2.41724e-133	2.77091e-132	290.315	EXOG
ENSG00000123405	0.00316225	7.2711	25.5941	2.71361e-133	3.10818e-132	289.803	NFE2
ENSG00000065882	0.00167428	6.95895	25.5935	2.7492e-133	3.14645e-132	289.744	TBC1D1
ENSG00000110448	-0.00243279	4.67344	-25.5882	3.08339e-133	3.52613e-132	289.779	CD5
ENSG00000163655	-0.00111273	5.23784	-25.5861	3.23039e-133	3.69133e-132	289.611	GMPS
ENSG00000088726	0.00332291	1.31649	25.5855	3.27025e-133	3.73393e-132	290.112	TMEM40
ENSG00000164933	-0.00144466	4.12736	-25.5852	3.29169e-133	3.75544e-132	289.769	SLC25A32
ENSG00000164073	-0.00110684	4.8779	-25.5821	3.52075e-133	4.0136e-132	289.57	MFSD8
ENSG00000180353	0.00170565	8.78904	25.576	4.02637e-133	4.58638e-132	289.493	HCLS1
ENSG00000179240	-0.00216585	3.66279	-25.5751	4.10947e-133	4.67736e-132	289.669
ENSG00000014123	-0.00128029	5.31146	-25.5677	4.82222e-133	5.48428e-132	289.22	UFL1
ENSG00000135334	0.0015182	4.37889	25.5551	6.34979e-133	7.2159e-132	288.959	AKIRIN2
ENSG00000135604	0.00266459	6.2778	25.5533	6.60907e-133	7.50464e-132	288.852	STX11
ENSG00000164815	-0.00155366	3.6283	-25.5506	7.00901e-133	7.95253e-132	289.119	ORC5
ENSG00000002834	0.00167297	7.28056	25.5479	7.43292e-133	8.42476e-132	288.772	LASP1
ENSG00000055483	-0.00171679	3.91883	-25.5478	7.43687e-133	8.42476e-132	289.003	USP36
ENSG00000115590	0.00410511	5.74903	25.545	7.9211e-133	8.96629e-132	288.673	IL1R2
ENSG00000070190	0.0018329	7.01781	25.5405	8.72517e-133	9.86873e-132	288.599	DAPP1
ENSG00000197321	0.00217686	6.55617	25.5321	1.04691e-132	1.1832e-131	288.397	SVIL
ENSG00000140332	0.00240913	6.55512	25.5315	1.06097e-132	1.19815e-131	288.387	TLE3
ENSG00000025156	-0.00197075	3.56314	-25.5313	1.06607e-132	1.20297e-131	288.734	HSF2
ENSG00000198821	-0.00203984	6.7812	-25.5297	1.10539e-132	1.24637e-131	288.349	CD247
ENSG00000100030	0.00169635	8.70662	25.5293	1.11304e-132	1.25402e-131	288.472	MAPK1
ENSG00000197208	0.00334206	4.8318	25.5248	1.22903e-132	1.38362e-131	288.247	SLC22A4
ENSG00000172081	0.00204775	5.58084	25.5036	1.95005e-132	2.19361e-131	287.769	MOB3A
ENSG00000164241	-0.00261226	3.17542	-25.5028	1.9851e-132	2.23131e-131	288.23	C5orf63
ENSG00000197852	0.00307549	6.62055	25.5	2.10619e-132	2.36558e-131	287.711	FAM212B
ENSG00000102043	-0.00240723	2.27614	-25.4925	2.48242e-132	2.78597e-131	288.241	MTMR8
ENSG00000113013	-0.000940582	6.62493	-25.4911	2.55668e-132	2.86709e-131	287.492	HSPA9
ENSG00000266028	0.00166192	5.58909	25.4907	2.58071e-132	2.8918e-131	287.476	SRGAP2
ENSG00000086189	-0.00157147	3.93163	-25.4866	2.81882e-132	3.15616e-131	287.669	DIMT1
ENSG00000110713	0.00160577	7.88132	25.4844	2.95846e-132	3.30995e-131	287.433	NUP98
ENSG00000197008	-0.00229911	3.60984	-25.484	2.98739e-132	3.33973e-131	287.698	ZNF138
ENSG00000120129	0.00337772	7.36107	25.4827	3.07489e-132	3.43489e-131	287.38	DUSP1
ENSG00000186431	0.00338688	4.81654	25.4815	3.1535e-132	3.51999e-131	287.31	FCAR
ENSG00000148660	0.00148081	6.16708	25.4811	3.17971e-132	3.54651e-131	287.268	CAMK2G
ENSG00000198648	-0.00210427	4.38951	-25.4797	3.28176e-132	3.65751e-131	287.437	STK39
ENSG00000119684	-0.00133275	5.13178	-25.4781	3.39805e-132	3.78419e-131	287.282	MLH3
ENSG00000084110	0.00311961	6.09792	25.4779	3.41243e-132	3.79728e-131	287.211	HAL
ENSG00000173153	0.00131818	4.51458	25.4767	3.49681e-132	3.88818e-131	287.265	ESRRA
ENSG00000143595	0.00445196	0.618265	25.4747	3.65329e-132	4.05906e-131	287.777	AQP10
ENSG00000213347	0.0026637	4.45256	25.4738	3.72386e-132	4.13428e-131	287.179	MXD3
ENSG00000074319	0.00125122	5.31923	25.4726	3.82405e-132	4.24226e-131	287.091	TSG101
ENSG00000143337	0.00117135	6.99268	25.4677	4.25404e-132	4.71566e-131	287.006	TOR1AIP1
ENSG00000141380	-0.000837241	5.76753	-25.4623	4.78515e-132	5.30033e-131	286.88	SS18
ENSG00000089157	-0.0016077	8.75245	-25.457	5.37259e-132	5.94646e-131	286.852	RPLP0
ENSG00000087253	0.00264287	6.79518	25.4499	6.26344e-132	6.92717e-131	286.629	LPCAT2
ENSG00000152942	-0.00125186	4.26308	-25.4492	6.35782e-132	7.02617e-131	286.777	RAD17
ENSG00000142347	0.00246877	8.86095	25.4397	7.82817e-132	8.64448e-131	286.543	MYO1F
ENSG00000171843	-0.00197581	4.89607	-25.4378	8.15989e-132	9.00391e-131	286.461	MLLT3
ENSG00000030582	0.00263543	6.41818	25.4351	8.64264e-132	9.52931e-131	286.304	GRN
ENSG00000143622	0.00177084	6.14657	25.4342	8.80724e-132	9.7034e-131	286.254	RIT1
ENSG00000188921	0.00134236	6.79629	25.4331	9.02793e-132	9.93897e-131	286.248	HACD4
ENSG00000267731	-0.00431733	2.66889	-25.4274	1.02171e-131	1.12395e-130	286.742
ENSG00000110057	0.00215167	5.57871	25.4268	1.03634e-131	1.13919e-130	286.115	UNC93B1
ENSG00000132341	-0.00113192	6.08658	-25.4235	1.11215e-131	1.2216e-130	286.032	RAN
ENSG00000138796	-0.00162532	3.69119	-25.4187	1.23346e-131	1.35381e-130	286.246	HADH
ENSG00000104974	0.00242817	5.1623	25.417	1.28117e-131	1.4051e-130	285.891	LILRA1
ENSG00000151882	-0.00266374	2.1411	-25.4104	1.47919e-131	1.62106e-130	286.502	CCL28
ENSG00000143207	0.00154972	7.21777	25.4072	1.58489e-131	1.73558e-130	285.709	RFWD2
ENSG00000146828	0.00200334	6.24301	25.4017	1.78357e-131	1.95166e-130	285.558	SLC12A9
ENSG00000254477	0.00275841	1.42785	25.3979	1.94033e-131	2.1216e-130	286.122
ENSG00000108306	0.00122685	5.66896	25.389	2.35188e-131	2.56964e-130	285.269	FBXL20
ENSG00000147044	-0.0016538	5.12244	-25.3877	2.42089e-131	2.64305e-130	285.332	CASK
ENSG00000125304	0.00139503	6.62011	25.3851	2.56025e-131	2.79309e-130	285.2	TM9SF2
ENSG00000216490	0.00217752	8.01404	25.3827	2.69477e-131	2.93763e-130	285.246	IFI30
ENSG00000146223	-0.000924981	6.24506	-25.3811	2.79059e-131	3.03979e-130	285.106	RPL7L1
ENSG00000240891	-0.00207702	4.78717	-25.3789	2.9292e-131	3.18837e-130	285.191	PLCXD2
ENSG00000145191	-0.00100931	5.25928	-25.3785	2.95397e-131	3.21292e-130	285.099	EIF2B5
ENSG00000113319	-0.00272047	4.86869	-25.3775	3.01609e-131	3.27801e-130	285.185	RASGRF2
ENSG00000058600	-0.00127115	4.83362	-25.3757	3.13888e-131	3.40891e-130	285.097	POLR3E
ENSG00000177888	-0.00168757	4.77359	-25.3745	3.21863e-131	3.49289e-130	285.107	ZBTB41
ENSG00000113749	0.00300437	5.8792	25.3727	3.35036e-131	3.63312e-130	284.925	HRH2
ENSG00000198189	0.00199081	7.37815	25.371	3.47814e-131	3.76885e-130	284.942	HSD17B11
ENSG00000100284	0.00209149	5.17037	25.3698	3.56991e-131	3.8654e-130	284.883	TOM1
ENSG00000170909	0.00255717	3.57599	25.3659	3.88383e-131	4.20215e-130	284.939	OSCAR
ENSG00000070540	0.00234414	4.67075	25.3658	3.89281e-131	4.20872e-130	284.808	WIPI1
ENSG00000100814	-0.00208455	3.1303	-25.3654	3.9241e-131	4.23937e-130	285.235	CCNB1IP1
ENSG00000171862	0.00209159	9.07335	25.3561	4.80193e-131	5.18386e-130	284.745	PTEN
ENSG00000138107	0.00107709	6.05673	25.3511	5.34696e-131	5.76793e-130	284.447	ACTR1A
ENSG00000204519	-0.00164688	4.27572	-25.3495	5.54197e-131	5.97384e-130	284.63	ZNF551
ENSG00000089123	-0.00168636	3.28796	-25.349	5.59773e-131	6.02944e-130	284.835	TASP1
ENSG00000132205	0.00215249	6.02088	25.3466	5.8948e-131	6.3447e-130	284.355	EMILIN2
ENSG00000125753	0.002532	7.83643	25.3464	5.92441e-131	6.37182e-130	284.448	VASP
ENSG00000198182	-0.00255853	2.79173	-25.3444	6.18212e-131	6.64405e-130	284.893	ZNF607
ENSG00000183718	-0.00117417	5.66286	-25.3438	6.26623e-131	6.72945e-130	284.324	TRIM52
ENSG00000159348	0.00157348	4.70456	25.3424	6.45506e-131	6.92709e-130	284.309	CYB5R1
ENSG00000163291	-0.00167425	3.51783	-25.3377	7.14831e-131	7.66534e-130	284.53	PAQR3
ENSG00000163519	-0.00279651	4.98898	-25.3355	7.50565e-131	8.04257e-130	284.267	TRAT1
ENSG00000162711	0.00227308	5.40913	25.3346	7.65048e-131	8.19168e-130	284.097	NLRP3
ENSG00000113460	-0.00200976	3.08959	-25.3314	8.19095e-131	8.7639e-130	284.505	BRIX1
ENSG00000139266	-0.00218531	2.75395	-25.3289	8.66113e-131	9.26011e-130	284.556	2025-03-09
ENSG00000160785	0.00189094	5.24051	25.3257	9.28275e-131	9.91738e-130	283.908	SLC25A44
ENSG00000138614	-0.00124938	4.27845	-25.3215	1.0152e-130	1.08381e-129	284.007	VWA9
ENSG00000109466	0.00253985	5.87768	25.3209	1.02997e-130	1.09876e-129	283.798	KLHL2
ENSG00000186174	-0.0020784	3.72536	-25.319	1.07176e-130	1.1425e-129	284.078	BCL9L
ENSG00000144840	-0.00153233	3.98238	-25.3137	1.2034e-130	1.28188e-129	283.904	RABL3
ENSG00000034152	0.00335832	6.08038	25.31	1.30252e-130	1.38644e-129	283.593	MAP2K3
ENSG00000168374	0.00114005	5.24902	25.3082	1.35511e-130	1.44136e-129	283.534	ARF4
ENSG00000116260	0.00206599	4.61581	25.3057	1.43128e-130	1.52126e-129	283.523	QSOX1
ENSG00000102032	0.00198905	2.78473	25.303	1.51523e-130	1.6093e-129	283.771	RENBP
ENSG00000237441	0.00174219	5.71118	25.3026	1.52818e-130	1.62186e-129	283.405	RGL2
ENSG00000048828	0.00105464	7.1953	25.2974	1.71188e-130	1.81549e-129	283.324	FAM120A
ENSG00000159720	0.00222222	6.82541	25.2946	1.82056e-130	1.92934e-129	283.261	ATP6V0D1
ENSG00000035664	0.00288271	5.64572	25.2918	1.93367e-130	2.04771e-129	283.173	DAPK2
ENSG00000058056	-0.00229188	3.15974	-25.289	2.05242e-130	2.17187e-129	283.594	USP13
ENSG00000205133	0.00192246	4.11685	25.288	2.10014e-130	2.22074e-129	283.196	TRIQK
ENSG00000015479	-0.00103529	7.80165	-25.2813	2.42516e-130	2.56255e-129	282.99	MATR3
ENSG00000269918	-0.00273598	2.27171	-25.273	2.90326e-130	3.06549e-129	283.494
ENSG00000099204	-0.00188903	6.92267	-25.2666	3.33165e-130	3.51526e-129	282.641	ABLIM1
ENSG00000103549	0.00154073	6.27882	25.2637	3.54608e-130	3.73878e-129	282.57	RNF40
ENSG00000148606	-0.00107597	4.45505	-25.2596	3.87749e-130	4.08521e-129	282.629	POLR3A
ENSG00000121864	-0.00143344	4.26638	-25.2497	4.80671e-130	5.06052e-129	282.465	ZNF639
ENSG00000154309	-0.00186866	3.15574	-25.2495	4.82543e-130	5.07654e-129	282.72	DISP1
ENSG00000145675	-0.00120978	7.26507	-25.2487	4.90974e-130	5.16148e-129	282.259	PIK3R1
ENSG00000003436	0.00311495	1.75096	25.2468	5.11119e-130	5.36935e-129	282.703	TFPI
ENSG00000181826	0.00262936	5.4627	25.2441	5.41867e-130	5.68823e-129	282.141	RELL1
ENSG00000169740	-0.00231403	3.03809	-25.2433	5.51218e-130	5.78219e-129	282.621	ZNF32
ENSG00000005007	0.00166508	6.29336	25.2429	5.56831e-130	5.83683e-129	282.121	UPF1
ENSG00000049860	0.00137018	5.84399	25.2414	5.74959e-130	6.02249e-129	282.077	HEXB
ENSG00000172932	0.00147761	5.95357	25.2408	5.82455e-130	6.09659e-129	282.077	ANKRD13D
ENSG00000143748	-0.00141366	4.26071	-25.2392	6.02356e-130	6.30033e-129	282.238	NVL
ENSG00000197959	0.00281726	3.58947	25.2374	6.26812e-130	6.55139e-129	282.167	DNM3
ENSG00000278600	0.00212957	5.28152	25.2357	6.50471e-130	6.79375e-129	281.965
ENSG00000116514	0.00211831	4.94726	25.2321	7.02908e-130	7.33613e-129	281.902	RNF19B
ENSG00000102054	-0.00103409	5.47469	-25.2319	7.05608e-130	7.35899e-129	281.913	RBBP7
ENSG00000112062	0.00230598	8.16104	25.2246	8.26254e-130	8.61103e-129	281.838	MAPK14
ENSG00000120333	-0.00133161	3.99728	-25.2182	9.49242e-130	9.88566e-129	281.831	MRPS14
ENSG00000065802	-0.00124573	4.84705	-25.2156	1.00281e-129	1.0436e-128	281.629	ASB1
ENSG00000196172	-0.00289191	2.80744	-25.2124	1.07431e-129	1.11721e-128	282.031	ZNF681
ENSG00000103264	-0.00162208	3.32882	-25.2097	1.14009e-129	1.18476e-128	281.807	FBXO31
ENSG00000284428	-0.00214015	3.52702	-25.2037	1.29605e-129	1.34586e-128	281.653	NA
ENSG00000170871	0.0017477	7.52942	25.2	1.40579e-129	1.45877e-128	281.252	KIAA0232
ENSG00000143226	0.00303194	9.68558	25.199	1.43515e-129	1.48817e-128	281.414	FCGR2A
ENSG00000165030	0.00287784	5.24092	25.1974	1.4863e-129	1.5401e-128	281.141	NFIL3
ENSG00000099308	0.00189819	5.75622	25.1954	1.55112e-129	1.60612e-128	281.095	MAST3
ENSG00000137509	0.00157771	6.73256	25.1953	1.55464e-129	1.60862e-128	281.105	PRCP
ENSG00000131408	0.00151604	4.7383	25.1931	1.62924e-129	1.6846e-128	281.107	NR1H2
ENSG00000137337	-0.00202823	3.05795	-25.1926	1.6487e-129	1.7035e-128	281.523	MDC1
ENSG00000106348	0.00233647	5.78441	25.191	1.70705e-129	1.76253e-128	281.003	IMPDH1
ENSG00000136040	0.00278777	9.05468	25.1909	1.70829e-129	1.76255e-128	281.188	PLXNC1
ENSG00000142192	0.0019891	5.71955	25.1898	1.75247e-129	1.80684e-128	280.967	APP
ENSG00000100522	-0.00187127	3.09148	-25.1866	1.87449e-129	1.93127e-128	281.381	GNPNAT1
ENSG00000184939	-0.00174056	5.32082	-25.1751	2.40152e-129	2.47251e-128	280.72	ZFP90
ENSG00000183309	-0.00101343	4.91012	-25.1678	2.81371e-129	2.89482e-128	280.584	ZNF623
ENSG00000185869	-0.00254794	2.45683	-25.1659	2.9319e-129	3.01427e-128	281.117	ZNF829
ENSG00000075785	0.00156493	5.55851	25.1644	3.03052e-129	3.11345e-128	280.417	RAB7A
ENSG00000129197	-0.00161229	4.86222	-25.159	3.40251e-129	3.49313e-128	280.419	RPAIN
ENSG00000081665	-0.00128302	5.85796	-25.153	3.87258e-129	3.9729e-128	280.2	ZNF506
ENSG00000103365	-0.00145867	6.33956	-25.1477	4.33761e-129	4.44682e-128	280.072	GGA2
ENSG00000047188	-0.00119578	5.714	-25.1437	4.72574e-129	4.84129e-128	280.003	YTHDC2
ENSG00000109381	0.0011777	6.88193	25.1399	5.13499e-129	5.25682e-128	279.913	ELF2
ENSG00000101361	-0.00123514	5.55248	-25.1291	6.48137e-129	6.63045e-128	279.697	NOP56
ENSG00000122406	-0.00183257	7.95344	-25.1284	6.58453e-129	6.73122e-128	279.7	RPL5
ENSG00000135127	-0.00253664	2.96684	-25.1261	6.91424e-129	7.06327e-128	280.139	BICDL1
ENSG00000101916	0.00266693	7.83798	25.1259	6.94568e-129	7.09038e-128	279.693	TLR8
ENSG00000144749	-0.00202342	4.73978	-25.1257	6.97054e-129	7.10753e-128	279.741	LRIG1
ENSG00000204577	0.00319204	6.23261	25.1257	6.97232e-129	7.10753e-128	279.606	LILRB3
ENSG00000135365	0.00165355	5.91908	25.121	7.71488e-129	7.85896e-128	279.482	PHF21A
ENSG00000114503	-0.00117429	5.09023	-25.1194	7.99272e-129	8.13625e-128	279.532	NCBP2
ENSG00000132357	0.00200167	4.04093	25.1162	8.55317e-129	8.70064e-128	279.493	CARD6
ENSG00000196923	0.00287833	3.59594	25.1112	9.52386e-129	9.68125e-128	279.445	PDLIM7
ENSG00000138964	0.00107376	6.83934	25.1082	1.01609e-128	1.03215e-127	279.23	PARVG
ENSG00000134899	-0.000787795	6.85697	-25.1046	1.09764e-128	1.11422e-127	279.142	ERCC5
ENSG00000137486	0.00140276	6.59737	25.1021	1.15849e-128	1.17516e-127	279.092	ARRB1
ENSG00000198055	0.00134611	6.60954	25.1013	1.17873e-128	1.19485e-127	279.083	GRK6
ENSG00000204977	-0.0011287	5.26356	-25.1002	1.20796e-128	1.22362e-127	279.101	TRIM13
ENSG00000118900	0.0024344	6.68124	25.0915	1.4548e-128	1.47263e-127	278.879	UBN1
ENSG00000152382	-0.00164279	3.10318	-25.0907	1.48042e-128	1.49752e-127	279.303	TADA1
ENSG00000166441	-0.00156649	8.05637	-25.0882	1.56437e-128	1.58133e-127	278.843	RPL27A
ENSG00000101084	0.00177148	5.92159	25.0864	1.62411e-128	1.64056e-127	278.74	C20orf24
ENSG00000138463	0.00188992	4.81228	25.0852	1.66589e-128	1.68159e-127	278.751	DIRC2
ENSG00000165138	-0.00241528	2.32874	-25.0845	1.69096e-128	1.70571e-127	279.414	ANKS6
ENSG00000198000	-0.00114852	5.43148	-25.0835	1.72984e-128	1.74371e-127	278.725	NOL8
ENSG00000162367	0.00389649	5.21007	25.083	1.74703e-128	1.75981e-127	278.707	TAL1
ENSG00000032444	0.00145277	4.98224	25.077	1.98727e-128	2.00042e-127	278.593	PNPLA6
ENSG00000114450	0.00200118	6.31041	25.0768	1.99556e-128	2.00736e-127	278.546	GNB4
ENSG00000102858	0.00207223	3.992	25.0749	2.08226e-128	2.09312e-127	278.634	MGRN1
ENSG00000128059	-0.00176364	3.23585	-25.0736	2.13844e-128	2.1481e-127	278.911	PPAT
ENSG00000139977	-0.0014352	4.6131	-25.0668	2.47836e-128	2.48782e-127	278.473	NAA30
ENSG00000160185	-0.00254378	4.56914	-25.061	2.80634e-128	2.8151e-127	278.395	UBASH3A
ENSG00000135828	0.00153526	6.34103	25.06	2.86403e-128	2.87099e-127	278.179	RNASEL
ENSG00000165801	0.00316012	5.65079	25.0597	2.88639e-128	2.89139e-127	278.176	ARHGEF40
ENSG00000169239	-0.00143461	5.1657	-25.0554	3.16508e-128	3.16837e-127	278.154	CA5B
ENSG00000181191	-0.00174167	3.50067	-25.0451	3.95057e-128	3.95193e-127	278.235	PJA1
ENSG00000137692	-0.00153018	3.92055	-25.0448	3.97417e-128	3.97279e-127	278.125	DCUN1D5
ENSG00000169692	0.00189022	3.4427	25.038	4.59596e-128	4.5912e-127	277.927	AGPAT2
ENSG00000140416	0.00253956	4.56629	25.0272	5.79962e-128	5.7896e-127	277.524	TPM1
ENSG00000130939	0.00114748	5.28762	25.0247	6.12071e-128	6.10592e-127	277.426	UBE4B
ENSG00000143669	0.00172264	10.0995	25.0246	6.13371e-128	6.11468e-127	277.677	LYST
ENSG00000101849	0.00194356	5.84314	25.0224	6.42796e-128	6.40359e-127	277.367	TBL1X
ENSG00000145247	-0.00257523	2.52159	-25.0219	6.49401e-128	6.46494e-127	278.016	OCIAD2
ENSG00000261326	-0.0018573	4.0424	-25.0075	8.852e-128	8.80631e-127	277.313	LINC01355
ENSG00000144118	0.00264194	6.77835	25.0074	8.86769e-128	8.81585e-127	277.082	RALB
ENSG00000175792	-0.00140533	4.08291	-25.0071	8.93516e-128	8.87682e-127	277.281	RUVBL1
ENSG00000136444	-0.00131759	4.29883	-25.0007	1.02384e-127	1.01646e-126	277.101	RSAD1
ENSG00000075420	0.00204557	7.22027	24.9967	1.11568e-127	1.10688e-126	276.869	FNDC3B
ENSG00000116120	-0.00150002	4.17654	-24.9909	1.26345e-127	1.25262e-126	276.918	FARSB
ENSG00000163602	0.00184262	6.50013	24.987	1.37536e-127	1.36263e-126	276.622	RYBP
ENSG00000103490	0.00222532	5.2359	24.9863	1.39586e-127	1.382e-126	276.623	PYCARD
ENSG00000170006	0.00240733	9.17813	24.9855	1.41878e-127	1.40373e-126	276.777	TMEM154
ENSG00000238160	0.00272706	4.41112	24.9842	1.45874e-127	1.44228e-126	276.616
ENSG00000127526	0.00110748	4.58869	24.9829	1.49939e-127	1.48145e-126	276.587	SLC35E1
ENSG00000170266	0.00128324	5.69148	24.9827	1.50866e-127	1.4896e-126	276.513	GLB1
ENSG00000112208	-0.00234205	2.74725	-24.9802	1.58989e-127	1.56873e-126	277.045	BAG2
ENSG00000058866	0.002108	3.88205	24.9798	1.60535e-127	1.5829e-126	276.59	DGKG
ENSG00000099810	-0.00141345	4.95825	-24.9777	1.67692e-127	1.65234e-126	276.514	MTAP
ENSG00000103037	-0.00191867	3.32595	-24.9734	1.84153e-127	1.8133e-126	276.747	SETD6
ENSG00000127947	0.00163256	5.82358	24.9728	1.86425e-127	1.83443e-126	276.304	PTPN12
ENSG00000018280	0.00321837	7.46746	24.9712	1.92787e-127	1.89574e-126	276.354	SLC11A1
ENSG00000113532	0.00193833	7.83397	24.9657	2.16941e-127	2.1318e-126	276.245	ST8SIA4
ENSG00000187601	-0.00213594	2.73266	-24.9616	2.37154e-127	2.32885e-126	276.649	MAGEH1
ENSG00000141564	-0.00138515	4.26721	-24.9615	2.37446e-127	2.33013e-126	276.266	RPTOR
ENSG00000145348	-0.00127634	5.46905	-24.9601	2.44774e-127	2.40041e-126	276.078	TBCK
ENSG00000147853	-0.00154415	4.3096	-24.9553	2.71285e-127	2.65859e-126	276.133	AK3
ENSG00000011523	-0.00192831	4.2883	-24.9498	3.05251e-127	2.98943e-126	276.036	CEP68
ENSG00000105486	-0.00187056	3.65602	-24.9396	3.80095e-127	3.71989e-126	275.94	LIG1
ENSG00000123124	-0.00137833	5.58432	-24.9382	3.91327e-127	3.82722e-126	275.605	WWP1
ENSG00000130023	-0.00159131	3.7789	-24.9357	4.12939e-127	4.03586e-126	275.817	ERMARD
ENSG00000138018	-0.00138476	4.5387	-24.9292	4.74867e-127	4.63797e-126	275.528	EPT1
ENSG00000115970	-0.00089391	6.42407	-24.9247	5.22242e-127	5.09724e-126	275.28	THADA
ENSG00000181220	0.00211612	5.58253	24.9245	5.24797e-127	5.11872e-126	275.274	ZNF746
ENSG00000115756	0.00159674	3.95827	24.924	5.30324e-127	5.16914e-126	275.405	HPCAL1
ENSG00000147439	0.00130472	4.88458	24.9238	5.32104e-127	5.18299e-126	275.3	BIN3
ENSG00000110172	-0.00126011	5.88658	-24.9214	5.61007e-127	5.46085e-126	275.234	CHORDC1
ENSG00000182183	-0.0024915	2.55095	-24.9207	5.69651e-127	5.54125e-126	275.842	FAM159A
ENSG00000284691	-0.00257019	2.51072	-24.9148	6.46014e-127	6.27985e-126	275.72	NA
ENSG00000169313	0.00324882	2.66309	24.9128	6.74637e-127	6.55368e-126	275.339	P2RY12
ENSG00000198455	-0.00199342	3.09478	-24.9081	7.44716e-127	7.22959e-126	275.414	ZXDB
ENSG00000025039	0.00238527	4.7082	24.9022	8.44955e-127	8.1972e-126	274.833	RRAGD
ENSG00000196562	0.00282418	6.91208	24.896	9.66659e-127	9.3716e-126	274.705	SULF2
ENSG00000103196	0.00409933	6.47861	24.8927	1.03693e-126	1.00461e-125	274.632	CRISPLD2
ENSG00000181852	0.000894901	5.88606	24.892	1.0517e-126	1.01824e-125	274.573	RNF41
ENSG00000078177	-0.00150304	5.65518	-24.8903	1.09203e-126	1.05658e-125	274.586	N4BP2
ENSG00000143119	0.00130351	8.48619	24.8901	1.0965e-126	1.06019e-125	274.668	CD53
ENSG00000177191	0.00308545	3.45911	24.8874	1.16119e-126	1.12199e-125	274.667	B3GNT8
ENSG00000105355	0.00247022	5.37765	24.8816	1.31466e-126	1.26943e-125	274.365	PLIN3
ENSG00000188641	0.00154655	8.2537	24.8787	1.39899e-126	1.34996e-125	274.409	DPYD
ENSG00000241878	0.0024291	5.70353	24.8764	1.46804e-126	1.41564e-125	274.247	PISD
ENSG00000165792	-0.0015285	4.28466	-24.8756	1.49379e-126	1.43952e-125	274.429	METTL17
ENSG00000100445	-0.00167952	3.96771	-24.8612	2.03274e-126	1.95758e-125	274.187	SDR39U1
ENSG00000198925	0.00191834	4.34443	24.8597	2.10094e-126	2.02191e-125	273.968	ATG9A
ENSG00000078369	0.00116712	7.47489	24.8591	2.12573e-126	2.04329e-125	273.93	GNB1
ENSG00000140632	0.00103124	5.88581	24.8591	2.12598e-126	2.04329e-125	273.869	GLYR1
ENSG00000109458	0.0020802	5.07506	24.8538	2.3835e-126	2.28927e-125	273.777	GAB1
ENSG00000160856	-0.0039267	5.39999	-24.8519	2.47989e-126	2.38027e-125	273.833	FCRL3
ENSG00000005469	-0.00196149	3.27268	-24.8516	2.49348e-126	2.39172e-125	274.154	CROT
ENSG00000119812	-0.00152997	3.62388	-24.8392	3.25063e-126	3.11591e-125	273.79	FAM98A
ENSG00000174748	-0.00126418	8.56858	-24.8384	3.30723e-126	3.16806e-125	273.53	RPL15
ENSG00000076554	-0.00288984	4.08698	-24.8337	3.65588e-126	3.49972e-125	273.625	TPD52
ENSG00000186265	-0.00309773	4.65578	-24.8334	3.68113e-126	3.52156e-125	273.527	BTLA
ENSG00000186073	-0.00233051	2.19575	-24.8316	3.82521e-126	3.65697e-125	274.028	C15orf41
ENSG00000188906	0.00281319	10.2887	24.8313	3.85353e-126	3.68161e-125	273.573	LRRK2
ENSG00000188554	0.00138481	7.72054	24.8302	3.94388e-126	3.76544e-125	273.332	NBR1
ENSG00000011376	-0.00118702	4.48381	-24.8291	4.03446e-126	3.84938e-125	273.394	LARS2
ENSG00000137955	-0.00132051	5.40985	-24.8277	4.15538e-126	3.96214e-125	273.261	RABGGTB
ENSG00000254087	0.00252282	8.4632	24.8232	4.57773e-126	4.36197e-125	273.256	LYN
ENSG00000130713	-0.00147879	4.26637	-24.8223	4.66255e-126	4.43987e-125	273.296	EXOSC2
ENSG00000137575	0.0026188	8.91589	24.8217	4.7238e-126	4.49523e-125	273.26	SDCBP
ENSG00000198721	-0.00156013	4.15776	-24.8184	5.06788e-126	4.81949e-125	273.238	ECI2
ENSG00000178467	-0.00126086	4.45788	-24.8158	5.36007e-126	5.094e-125	273.118	P4HTM
ENSG00000144161	-0.00173716	3.35939	-24.8138	5.5926e-126	5.3115e-125	273.32	ZC3H8
ENSG00000105778	0.00076135	6.74434	24.8091	6.18266e-126	5.86804e-125	272.818	AVL9
ENSG00000101986	0.00184153	2.56983	24.8082	6.30173e-126	5.97713e-125	273.189	ABCD1
ENSG00000173171	0.00222304	5.17938	24.8051	6.73861e-126	6.38731e-125	272.736	MTX1
ENSG00000147874	-0.00100387	5.14536	-24.805	6.74518e-126	6.38936e-125	272.789	HAUS6
ENSG00000231500	-0.00254517	7.76334	-24.8049	6.76497e-126	6.40391e-125	272.775	RPS18
ENSG00000166266	-0.00106755	5.36281	-24.8035	6.97255e-126	6.59609e-125	272.745	CUL5
ENSG00000065183	-0.00126453	4.80225	-24.8011	7.3312e-126	6.93084e-125	272.757	WDR3
ENSG00000134516	0.00105909	8.91666	24.7961	8.16954e-126	7.71835e-125	272.689	DOCK2
ENSG00000014216	0.00174669	5.57598	24.7907	9.15177e-126	8.64068e-125	272.43	CAPN1
ENSG00000118564	0.00190975	8.87557	24.7899	9.31303e-126	8.78719e-125	272.568	FBXL5
ENSG00000225342	0.00229962	4.19106	24.7824	1.09279e-125	1.03042e-124	272.335
ENSG00000090612	-0.00175581	4.79202	-24.7743	1.29925e-125	1.22429e-124	272.209	ZNF268
ENSG00000111785	-0.00156386	4.16005	-24.7685	1.47109e-125	1.38532e-124	272.173	RIC8B
ENSG00000119004	-0.00113844	5.43048	-24.7669	1.52081e-125	1.43121e-124	271.954	CYP20A1
ENSG00000136868	0.00200246	4.64468	24.7656	1.5642e-125	1.47108e-124	271.925	SLC31A1
ENSG00000052723	-0.00102686	5.29165	-24.765	1.58504e-125	1.48971e-124	271.93	SIKE1
ENSG00000142556	-0.00158237	3.68446	-24.7459	2.38312e-125	2.23834e-124	271.79	ZNF614
ENSG00000197808	-0.00233234	2.39349	-24.7434	2.51094e-125	2.35686e-124	272.086	ZNF461
ENSG00000205268	-0.0011352	7.54055	-24.7414	2.61863e-125	2.45634e-124	271.401	PDE7A
ENSG00000007392	-0.00137487	4.89717	-24.737	2.87606e-125	2.69608e-124	271.376	LUC7L
ENSG00000116127	-0.00136888	6.77338	-24.7331	3.12591e-125	2.92839e-124	271.198	ALMS1
ENSG00000169896	0.00247032	6.86543	24.7315	3.23566e-125	3.02924e-124	271.193	ITGAM
ENSG00000182095	0.00195506	4.76867	24.7302	3.32763e-125	3.11333e-124	271.198	TNRC18
ENSG00000196437	-0.00209336	2.73661	-24.728	3.48492e-125	3.25838e-124	271.657	ZNF569
ENSG00000166949	-0.00171449	5.05151	-24.7266	3.59364e-125	3.35785e-124	271.146	SMAD3
ENSG00000136100	-0.000895202	5.81034	-24.7248	3.73029e-125	3.48329e-124	271.032	VPS36
ENSG00000104687	0.00139303	5.95634	24.7239	3.79988e-125	3.54598e-124	270.991	GSR
ENSG00000181163	-0.00161447	7.27945	-24.7215	4.00039e-125	3.73069e-124	270.97	NPM1
ENSG00000170903	-0.00120087	4.54754	-24.7183	4.28819e-125	3.99651e-124	271.028	MSANTD4
ENSG00000127831	0.00413594	0.980807	24.7143	4.66925e-125	4.34884e-124	271.395	VIL1
ENSG00000173559	0.00208656	9.00156	24.7066	5.49921e-125	5.11855e-124	270.806	NABP1
ENSG00000073584	-0.000803154	6.24731	-24.702	6.06772e-125	5.64407e-124	270.533	SMARCE1
ENSG00000148219	-0.00258962	2.05864	-24.7	6.32642e-125	5.88093e-124	271.275	ASTN2
ENSG00000171105	0.00194089	3.79951	24.6969	6.75172e-125	6.27225e-124	270.571	INSR
ENSG00000100368	0.00296219	8.14653	24.6967	6.78636e-125	6.30037e-124	270.542	CSF2RB
ENSG00000108474	-0.00187742	3.5366	-24.6948	7.06635e-125	6.5561e-124	270.751	PIGL
ENSG00000110395	0.00182309	6.71898	24.694	7.18517e-125	6.66206e-124	270.384	CBL
ENSG00000204650	-0.00239332	3.57742	-24.6919	7.50904e-125	6.9579e-124	270.703	CRHR1-IT1
ENSG00000176407	0.000968466	5.85579	24.6916	7.56824e-125	7.00826e-124	270.3	KCMF1
ENSG00000185104	-0.000991889	5.17052	-24.6881	8.15257e-125	7.54452e-124	270.293	FAF1
ENSG00000136925	-0.00122695	4.07835	-24.6839	8.91313e-125	8.24308e-124	270.377	TSTD2
ENSG00000156052	0.00201548	7.31226	24.6817	9.34464e-125	8.63662e-124	270.153	GNAQ
ENSG00000156026	0.00136367	4.19003	24.6797	9.73856e-125	8.99495e-124	270.165	MCU
ENSG00000140350	0.00124471	7.0586	24.6776	1.01934e-124	9.409e-124	270.041	ANP32A
ENSG00000138678	0.0028803	5.40228	24.6745	1.0877e-124	1.00337e-123	269.953	GPAT3
ENSG00000103356	-0.0015158	3.66424	-24.6708	1.17736e-124	1.08537e-123	270.2	EARS2
ENSG00000156502	-0.00138341	3.89749	-24.6704	1.18656e-124	1.09316e-123	270.132	SUPV3L1
ENSG00000047578	0.00140539	4.44568	24.6693	1.21641e-124	1.11995e-123	269.918	KIAA0556
ENSG00000135426	-0.00226023	5.13563	-24.6678	1.25454e-124	1.15432e-123	269.91	TESPA1
ENSG00000087266	0.00136715	6.45359	24.6643	1.35072e-124	1.24203e-123	269.737	SH3BP2
ENSG00000092929	0.00169227	6.02254	24.6625	1.40371e-124	1.28993e-123	269.708	UNC13D
ENSG00000197081	0.00273764	9.67339	24.6608	1.45741e-124	1.33843e-123	269.895	IGF2R
ENSG00000135913	-0.000918359	5.16081	-24.6589	1.51562e-124	1.39101e-123	269.677	USP37
ENSG00000136560	0.00117702	6.78403	24.6545	1.66566e-124	1.52773e-123	269.537	TANK
ENSG00000111540	0.00145856	5.21858	24.6539	1.68494e-124	1.54444e-123	269.522	RAB5B
ENSG00000135821	0.00303009	9.82898	24.6535	1.7017e-124	1.55881e-123	269.762	GLUL
ENSG00000148843	-0.00120088	5.04426	-24.6524	1.73914e-124	1.5921e-123	269.56	PDCD11
ENSG00000153317	0.00202001	6.25225	24.6468	1.95923e-124	1.79245e-123	269.368	ASAP1
ENSG00000204310	0.00166662	2.75542	24.6468	1.9616e-124	1.79348e-123	269.726	AGPAT1
ENSG00000228242	0.00295061	4.15859	24.6461	1.98851e-124	1.81694e-123	269.432
ENSG00000124198	-0.000884411	6.13074	-24.6458	2.00199e-124	1.82809e-123	269.34	ARFGEF2
ENSG00000143570	0.00144722	4.93738	24.6399	2.26997e-124	2.07149e-123	269.241	SLC39A1
ENSG00000163513	0.00126044	8.46714	24.6373	2.39901e-124	2.18787e-123	269.281	TGFBR2
ENSG00000185101	-0.00248722	3.62839	-24.6367	2.42762e-124	2.21256e-123	269.509	ANO9
ENSG00000117280	-0.00135613	5.79133	-24.6365	2.43783e-124	2.22046e-123	269.163	RAB29
ENSG00000100485	0.00172071	6.96027	24.6288	2.87259e-124	2.61481e-123	269.007	SOS2
ENSG00000151881	-0.00223294	2.51746	-24.6278	2.93237e-124	2.66755e-123	269.59	TMEM267
ENSG00000148180	0.00287217	6.30105	24.6243	3.16232e-124	2.87493e-123	268.901	GSN
ENSG00000164022	-0.00145173	4.834	-24.6239	3.1883e-124	2.89672e-123	268.991	AIMP1
ENSG00000104915	0.00175348	5.28938	24.6228	3.26042e-124	2.96039e-123	268.87	STX10
ENSG00000159322	0.00086599	7.00383	24.6212	3.37597e-124	3.06338e-123	268.836	ADPGK
ENSG00000113593	-0.00118241	5.39325	-24.6196	3.4909e-124	3.16568e-123	268.832	PPWD1
ENSG00000127081	-0.00161256	5.15157	-24.6193	3.51303e-124	3.18375e-123	268.863	ZNF484
ENSG00000132405	0.00208285	7.35	24.6171	3.67944e-124	3.33247e-123	268.785	TBC1D14
ENSG00000151687	-0.001913	3.22399	-24.6162	3.75388e-124	3.39777e-123	269.151	ANKAR
ENSG00000123643	0.00211577	4.66495	24.6158	3.78291e-124	3.4219e-123	268.741	SLC36A1
ENSG00000166181	-0.000785461	6.30199	-24.6131	4.01147e-124	3.62638e-123	268.645	API5
ENSG00000182220	0.00113674	6.70089	24.609	4.3762e-124	3.95362e-123	268.568	ATP6AP2
ENSG00000049245	0.00148197	5.94222	24.6063	4.6346e-124	4.18446e-123	268.494	VAMP3
ENSG00000159753	-0.0022567	2.98975	-24.6042	4.84519e-124	4.37186e-123	268.956	CARMIL2
ENSG00000114573	0.00226299	7.44876	24.6032	4.94224e-124	4.45665e-123	268.503	ATP6V1A
ENSG00000126581	0.00103207	6.33935	24.603	4.97263e-124	4.48125e-123	268.426	BECN1
ENSG00000171206	0.00155072	4.38952	24.5985	5.46751e-124	4.92417e-123	268.422	TRIM8
ENSG00000184500	0.00444791	2.45674	24.5942	5.99203e-124	5.3932e-123	268.569	PROS1
ENSG00000156671	0.00118613	6.15243	24.5902	6.51781e-124	5.86278e-123	268.154	SAMD8
ENSG00000104805	0.00228946	5.81298	24.5875	6.90696e-124	6.20896e-123	268.117	NUCB1
ENSG00000197841	-0.00233196	3.66562	-24.5863	7.07742e-124	6.35824e-123	268.427	ZNF181
ENSG00000261997	0.00239488	3.74004	24.5823	7.70926e-124	6.92158e-123	268.143
ENSG00000130827	-0.00241048	2.81529	-24.5817	7.81251e-124	7.00992e-123	268.537	PLXNA3
ENSG00000144935	-0.00340448	2.08005	-24.5796	8.15896e-124	7.31624e-123	268.732	TRPC1
ENSG00000139537	-0.00382326	1.63147	-24.5767	8.66966e-124	7.76937e-123	268.792	CCDC65
ENSG00000184613	-0.0034791	5.8633	-24.5763	8.75933e-124	7.84487e-123	267.947	NELL2
ENSG00000198464	-0.00207567	4.10594	-24.5758	8.84809e-124	7.91945e-123	268.109	ZNF480
ENSG00000126883	0.00151262	6.21191	24.5753	8.94404e-124	8.00037e-123	267.839	NUP214
ENSG00000246263	0.00218696	4.44257	24.5704	9.92359e-124	8.87109e-123	267.808	UBR5-AS1
ENSG00000139644	0.00117141	9.00107	24.568	1.04334e-123	9.32104e-123	267.855	TMBIM6
ENSG00000100599	0.00160579	4.86664	24.5676	1.05229e-123	9.3952e-123	267.727	RIN3
ENSG00000111647	0.0016287	6.51668	24.5624	1.17412e-123	1.04765e-122	267.58	UHRF1BP1L
ENSG00000134250	0.0017104	8.34629	24.5576	1.29994e-123	1.1592e-122	267.593	NOTCH2
ENSG00000024048	0.00180839	8.51077	24.556	1.34435e-123	1.19807e-122	267.575	UBR2
ENSG00000175155	0.00104767	5.92092	24.5558	1.35197e-123	1.20411e-122	267.42	YPEL2
ENSG00000188895	0.00219677	7.77371	24.5544	1.39251e-123	1.23945e-122	267.49	MSL1
ENSG00000059588	-0.00170492	5.17	-24.5544	1.39345e-123	1.23952e-122	267.485	TARBP1
ENSG00000163728	-0.00116424	6.61695	-24.5495	1.54592e-123	1.37431e-122	267.307	TTC14
ENSG00000136167	0.00179448	10.9211	24.546	1.66295e-123	1.47744e-122	267.552	LCP1
ENSG00000105202	-0.00162001	4.71351	-24.5431	1.76938e-123	1.57103e-122	267.302	FBL
ENSG00000171858	-0.00283606	5.18359	-24.5412	1.83933e-123	1.63214e-122	267.237	RPS21
ENSG00000142669	0.00191285	5.22064	24.5411	1.84324e-123	1.6346e-122	267.143	SH3BGRL3
ENSG00000109332	0.00121703	8.71755	24.5394	1.91152e-123	1.69412e-122	267.231	UBE2D3
ENSG00000006652	0.00217505	6.7117	24.5389	1.93303e-123	1.71213e-122	267.095	IFRD1
ENSG00000141506	0.00130792	6.78534	24.5357	2.06916e-123	1.83158e-122	267.022	PIK3R5
ENSG00000107937	-0.00116089	4.64598	-24.5325	2.21548e-123	1.9599e-122	267.071	GTPBP4
ENSG00000111817	0.0018992	6.10356	24.5214	2.79935e-123	2.4749e-122	266.702	DSE
ENSG00000134996	0.00163547	6.92137	24.5198	2.89684e-123	2.55953e-122	266.696	OSTF1
ENSG00000029639	-0.00157156	3.60973	-24.5194	2.92175e-123	2.57996e-122	267.006	TFB1M
ENSG00000166750	-0.00183656	7.63962	-24.514	3.27731e-123	2.89216e-122	266.58	SLFN5
ENSG00000090372	0.00163437	3.81598	24.5134	3.31349e-123	2.9223e-122	266.71	STRN4
ENSG00000137642	0.00246682	10.9946	24.5131	3.33999e-123	2.94388e-122	266.869	SORL1
ENSG00000148730	0.00110756	7.04189	24.5014	4.27677e-123	3.76725e-122	266.309	EIF4EBP2
ENSG00000145649	-0.0042587	4.73993	-24.4976	4.63183e-123	4.07753e-122	266.393	GZMA
ENSG00000135473	-0.00136217	5.00885	-24.4963	4.76429e-123	4.19159e-122	266.261	PAN2
ENSG00000185920	-0.00335271	2.90298	-24.4943	4.97234e-123	4.37115e-122	266.694	PTCH1
ENSG00000107625	-0.00131154	4.70251	-24.4942	4.97444e-123	4.37115e-122	266.26	DDX50
ENSG00000167645	0.00174367	2.70542	24.492	5.21174e-123	4.5769e-122	266.463	YIF1B
ENSG00000078596	-0.00283951	4.72633	-24.4913	5.29258e-123	4.64506e-122	266.244	ITM2A
ENSG00000108839	0.00395609	1.14834	24.4871	5.78294e-123	5.07235e-122	266.546	ALOX12
ENSG00000117139	0.00106944	5.92172	24.4829	6.31654e-123	5.53703e-122	265.883	KDM5B
ENSG00000163349	0.0015626	7.78941	24.4773	7.12437e-123	6.24138e-122	265.854	HIPK1
ENSG00000245498	-0.00257993	1.99969	-24.4747	7.52385e-123	6.58736e-122	266.515
ENSG00000121064	0.00179174	6.18071	24.4741	7.61329e-123	6.65929e-122	265.705	SCPEP1
ENSG00000173120	0.000954396	6.75086	24.4741	7.61522e-123	6.65929e-122	265.714	KDM2A
ENSG00000101336	0.00271932	8.44915	24.4729	7.80717e-123	6.82301e-122	265.824	HCK
ENSG00000136942	-0.00253037	5.91654	-24.4728	7.82667e-123	6.83592e-122	265.742	RPL35
ENSG00000176170	0.00274094	1.19133	24.4718	7.99581e-123	6.97943e-122	266.335	SPHK1
ENSG00000008086	0.00189765	4.57208	24.4705	8.22409e-123	7.17436e-122	265.68	CDKL5
ENSG00000109046	0.00135601	7.48621	24.4691	8.46941e-123	7.38392e-122	265.654	WSB1
ENSG00000102804	0.00201572	5.32276	24.4668	8.89362e-123	7.74908e-122	265.556	TSC22D1
ENSG00000125779	0.00098308	6.03538	24.4631	9.61784e-123	8.37505e-122	265.461	PANK2
ENSG00000110848	-0.00297105	3.37838	-24.4629	9.64763e-123	8.39593e-122	265.893	CD69
ENSG00000206530	-0.00207444	3.8314	-24.4628	9.66568e-123	8.40658e-122	265.78	CFAP44
ENSG00000197381	-0.00194455	4.25707	-24.4618	9.87939e-123	8.58729e-122	265.667	ADARB1
ENSG00000087074	0.00223101	5.44317	24.4601	1.02357e-122	8.89169e-122	265.414	PPP1R15A
ENSG00000181481	0.0017405	4.28117	24.4561	1.1142e-122	9.67316e-122	265.409	RNF135
ENSG00000203710	0.00324604	8.0261	24.456	1.11525e-122	9.6764e-122	265.445	CR1
ENSG00000104973	0.00210772	5.11376	24.4518	1.21938e-122	1.05735e-121	265.249	MED25
ENSG00000213809	-0.00348688	5.9239	-24.4512	1.23492e-122	1.07019e-121	265.283	KLRK1
ENSG00000186205	0.00355515	5.09894	24.4481	1.31865e-122	1.14207e-121	265.173	2025-03-01
ENSG00000159086	-0.00111861	5.67919	-24.4418	1.5074e-122	1.30476e-121	265.055	PAXBP1
ENSG00000122694	0.00195299	7.01949	24.4356	1.71851e-122	1.4866e-121	264.928	GLIPR2
ENSG00000245910	-0.00186652	3.82138	-24.4271	2.05534e-122	1.77691e-121	265.017	SNHG6
ENSG00000227486	-0.00316698	2.28365	-24.4244	2.17339e-122	1.87784e-121	265.381
ENSG00000189077	0.00215229	4.14264	24.4239	2.19923e-122	1.89903e-121	264.75	TMEM120A
ENSG00000133816	0.00292123	7.6374	24.4218	2.29687e-122	1.98217e-121	264.696	MICAL2
ENSG00000066136	0.00114584	4.71248	24.4201	2.38021e-122	2.05286e-121	264.617	NFYC
ENSG00000144566	0.00127536	5.70477	24.4191	2.43517e-122	2.09901e-121	264.539	RAB5A
ENSG00000127084	0.00150367	6.86552	24.4167	2.5597e-122	2.20503e-121	264.519	FGD3
ENSG00000069702	-0.00353372	5.2277	-24.4166	2.56598e-122	2.20912e-121	264.605	TGFBR3
ENSG00000233184	-0.00240096	3.53116	-24.4151	2.64534e-122	2.2761e-121	264.855
ENSG00000164938	0.0017527	7.38188	24.4121	2.8212e-122	2.42596e-121	264.451	TP53INP1
ENSG00000156482	-0.00182222	8.03336	-24.4109	2.89128e-122	2.48475e-121	264.43	RPL30
ENSG00000033800	0.00108995	7.33132	24.4108	2.89597e-122	2.4873e-121	264.413	PIAS1
ENSG00000256525	-0.00167263	3.60208	-24.4098	2.95892e-122	2.53985e-121	264.695	POLG2
ENSG00000108100	0.00136538	6.67857	24.4087	3.03233e-122	2.60132e-121	264.335	CCNY
ENSG00000158517	0.00304296	7.5029	24.4047	3.29877e-122	2.82821e-121	264.323	NCF1
ENSG00000167261	0.00222988	5.72107	24.4036	3.37658e-122	2.89321e-121	264.217	DPEP2
ENSG00000261609	-0.0011785	4.6747	-24.4025	3.45526e-122	2.95887e-121	264.322	GAN
ENSG00000105640	-0.00129407	8.11426	-24.3992	3.69856e-122	3.16535e-121	264.201	RPL18A
ENSG00000269609	-0.00161792	4.1942	-24.3981	3.7919e-122	3.24331e-121	264.322	RPARP-AS1
ENSG00000169905	0.000872171	6.63966	24.3971	3.86695e-122	3.30555e-121	264.086	TOR1AIP2
ENSG00000109854	0.00157414	4.89811	24.3964	3.92784e-122	3.35561e-121	264.093	HTATIP2
ENSG00000121957	0.00213126	3.64692	24.3962	3.94556e-122	3.36876e-121	264.228	GPSM2
ENSG00000163681	0.000951582	6.32431	24.3948	4.05908e-122	3.46364e-121	264.028	SLMAP
ENSG00000158079	-0.00217706	2.81771	-24.3829	5.22125e-122	4.4527e-121	264.35	PTPDC1
ENSG00000157954	0.00163391	5.98244	24.3798	5.57124e-122	4.74837e-121	263.713	WIPI2
ENSG00000196954	0.00195684	7.84667	24.3772	5.88208e-122	5.01034e-121	263.753	CASP4
ENSG00000111581	-0.00117815	4.91376	-24.3765	5.97835e-122	5.08934e-121	263.743	NUP107
ENSG00000075223	0.00238535	3.5546	24.3762	6.01297e-122	5.1158e-121	263.822	SEMA3C
ENSG00000189190	-0.00307049	4.62764	-24.3733	6.39212e-122	5.43518e-121	263.764	ZNF600
ENSG00000067225	0.00129218	6.13492	24.3715	6.63896e-122	5.64175e-121	263.538	PKM
ENSG00000128309	0.00193227	3.35173	24.3681	7.13318e-122	6.05817e-121	263.702	MPST
ENSG00000111605	-0.00147417	6.04043	-24.3675	7.22835e-122	6.1354e-121	263.49	CPSF6
ENSG00000126804	-0.00117159	6.0555	-24.3632	7.90148e-122	6.70281e-121	263.385	ZBTB1
ENSG00000108861	0.00181854	5.19564	24.3572	8.97197e-122	7.60644e-121	263.248	DUSP3
ENSG00000108061	0.0012515	7.19286	24.3571	8.9977e-122	7.62378e-121	263.276	SHOC2
ENSG00000124731	0.00336799	7.42071	24.3536	9.68585e-122	8.20205e-121	263.245	TREM1
ENSG00000165914	0.00261881	1.91483	24.3357	1.41168e-121	1.19472e-120	263.3	TTC7B
ENSG00000064763	0.00243566	5.18655	24.3344	1.44937e-121	1.2259e-120	262.769	FAR2
ENSG00000185716	-0.00141841	4.02482	-24.3318	1.53118e-121	1.29434e-120	262.958	C16orf52
ENSG00000136048	0.00201363	3.81275	24.3292	1.61636e-121	1.36555e-120	262.797	DRAM1
ENSG00000164284	-0.00160834	4.19373	-24.3283	1.64851e-121	1.39189e-120	262.862	GRPEL2
ENSG00000133422	-0.00132027	4.98323	-24.3262	1.72337e-121	1.45425e-120	262.68	MORC2
ENSG00000075651	0.00189381	4.07731	24.323	1.84382e-121	1.55498e-120	262.63	PLD1
ENSG00000139746	-0.00110949	6.13605	-24.3223	1.86934e-121	1.57558e-120	262.523	RBM26
ENSG00000254876	-0.00259732	3.19628	-24.3212	1.91308e-121	1.61152e-120	262.963
ENSG00000010810	-0.00127978	7.22772	-24.3187	2.01657e-121	1.6977e-120	262.451	FYN
ENSG00000128534	-0.00128694	6.21526	-24.3186	2.02174e-121	1.70106e-120	262.449	LSM8
ENSG00000274712	-0.0031386	1.65434	-24.3175	2.06791e-121	1.73889e-120	263.311
ENSG00000087995	-0.00159007	3.35519	-24.3143	2.21423e-121	1.86086e-120	262.745	METTL2A
ENSG00000148019	-0.00271073	5.5948	-24.3075	2.55571e-121	2.14659e-120	262.266	CEP78
ENSG00000266094	0.00114214	7.89714	24.3065	2.60942e-121	2.19043e-120	262.256	RASSF5
ENSG00000186104	-0.00164106	3.89771	-24.3058	2.64549e-121	2.21942e-120	262.442	CYP2R1
ENSG00000166432	-0.00170931	4.91698	-24.2965	3.21794e-121	2.6981e-120	262.082	ZMAT1
ENSG00000197006	0.00204028	6.74092	24.2961	3.24413e-121	2.71849e-120	261.985	METTL9
ENSG00000082014	0.00225359	3.34383	24.296	3.25453e-121	2.72562e-120	262.173	SMARCD3
ENSG00000124767	-0.00133269	4.59627	-24.2956	3.2823e-121	2.74729e-120	262.093	GLO1
ENSG00000177169	0.00206399	3.95077	24.2949	3.32882e-121	2.78462e-120	262.072	ULK1
ENSG00000162511	0.0015418	8.54376	24.2914	3.58659e-121	2.99851e-120	261.994	LAPTM5
ENSG00000145901	0.00170123	6.30294	24.2905	3.64769e-121	3.04782e-120	261.848	TNIP1
ENSG00000080608	-0.00168315	4.04821	-24.2898	3.70568e-121	3.09449e-120	262.079	PUM3
ENSG00000165097	0.0016273	4.97006	24.2881	3.84142e-121	3.20599e-120	261.81	KDM1B
ENSG00000170113	-0.00191852	4.18586	-24.2857	4.03934e-121	3.36922e-120	261.974	NIPA1
ENSG00000146112	0.00177587	6.34663	24.285	4.09774e-121	3.41597e-120	261.731	PPP1R18
ENSG00000123545	-0.00252523	2.19373	-24.2821	4.35328e-121	3.6269e-120	262.391	NDUFAF4
ENSG00000085998	-0.00139153	3.6655	-24.2815	4.41427e-121	3.67559e-120	261.969	POMGNT1
ENSG00000143971	-0.00210486	3.60306	-24.2715	5.44544e-121	4.5316e-120	261.796	ETAA1
ENSG00000139291	-0.00151385	4.72631	-24.267	5.98202e-121	4.97526e-120	261.481	TMEM19
ENSG00000135185	-0.00154857	4.48595	-24.2636	6.42613e-121	5.34156e-120	261.45	TMEM243
ENSG00000155636	-0.00145093	3.76226	-24.2628	6.5324e-121	5.42677e-120	261.564	RBM45
ENSG00000119596	-0.0010116	6.02916	-24.2621	6.63211e-121	5.50644e-120	261.252	YLPM1
ENSG00000163002	-0.00179053	3.0982	-24.2592	7.05482e-121	5.85404e-120	261.655	NUP35
ENSG00000162341	0.00164955	3.97431	24.2573	7.33445e-121	6.08259e-120	261.284	TPCN2
ENSG00000128594	0.00319717	5.36969	24.2538	7.89332e-121	6.54232e-120	261.078	LRRC4
ENSG00000146909	-0.00129278	4.34678	-24.2533	7.98234e-121	6.61231e-120	261.243	NOM1
ENSG00000101367	0.000922147	6.47398	24.2491	8.71855e-121	7.21802e-120	260.97	MAPRE1
ENSG00000118412	-0.00132883	5.84237	-24.2489	8.75645e-121	7.24525e-120	260.995	CASP8AP2
ENSG00000106591	-0.00184715	3.54327	-24.2486	8.8004e-121	7.27745e-120	261.323	MRPL32
ENSG00000043143	-0.00107747	5.92684	-24.2478	8.96418e-121	7.40865e-120	260.963	JADE2
ENSG00000180891	0.00227829	2.84177	24.2469	9.12948e-121	7.54095e-120	261.26	CUEDC1
ENSG00000232334	0.00267448	1.98086	24.2464	9.22766e-121	7.6177e-120	261.421
ENSG00000140526	0.00232217	7.95482	24.2452	9.45509e-121	7.80099e-120	260.993	ABHD2
ENSG00000092847	0.000989918	6.14473	24.2426	9.98457e-121	8.23314e-120	260.828	AGO1
ENSG00000125630	-0.00126571	4.71515	-24.2416	1.01889e-120	8.39686e-120	260.942	POLR1B
ENSG00000144867	-0.00130479	4.46486	-24.2404	1.04685e-120	8.62235e-120	260.955	SRPRB
ENSG00000204186	-0.0026278	3.71054	-24.2374	1.11419e-120	9.1718e-120	261.088	ZDBF2
ENSG00000163297	0.00158758	7.35954	24.2277	1.36609e-120	1.1239e-119	260.572	ANTXR2
ENSG00000110429	-0.000901851	6.15249	-24.2202	1.59748e-120	1.31352e-119	260.374	FBXO3
ENSG00000133943	0.00181559	6.85111	24.2173	1.69741e-120	1.39489e-119	260.329	C14orf159
ENSG00000275835	-0.00180212	3.77487	-24.2134	1.84173e-120	1.51263e-119	260.542	TUBGCP5
ENSG00000105520	0.00262391	3.16814	24.2122	1.8902e-120	1.55155e-119	260.445	PLPPR2
ENSG00000131653	0.00116671	4.35712	24.2115	1.91666e-120	1.57238e-119	260.29	TRAF7
ENSG00000162819	0.00113349	6.24095	24.2105	1.95995e-120	1.60698e-119	260.161	BROX
ENSG00000204147	-0.00346052	1.69228	-24.2074	2.09206e-120	1.71432e-119	260.986	ASAH2B
ENSG00000254772	-0.00142175	9.27262	-24.2072	2.10097e-120	1.72066e-119	260.232	EEF1G
ENSG00000179981	-0.00159226	3.6901	-24.201	2.38951e-120	1.95585e-119	260.286	TSHZ1
ENSG00000175548	-0.00188925	4.02637	-24.1996	2.46359e-120	2.01535e-119	260.202	ALG10B
ENSG00000175265	-0.00263413	6.00795	-24.1966	2.62262e-120	2.14423e-119	259.913	GOLGA8A
ENSG00000120526	-0.00178801	3.87318	-24.1959	2.66038e-120	2.17387e-119	260.149	NUDCD1
ENSG00000243646	0.0019039	6.27542	24.1953	2.69332e-120	2.19955e-119	259.846	IL10RB
ENSG00000255733	-0.00426924	3.59787	-24.188	3.137e-120	2.56044e-119	260.131	IFNG-AS1
ENSG00000090097	-0.00260743	1.81384	-24.188	3.14119e-120	2.56241e-119	260.509	PCBP4
ENSG00000255112	0.00140308	6.74066	24.1879	3.14312e-120	2.56254e-119	259.704	CHMP1B
ENSG00000014257	0.00240663	4.78147	24.1825	3.52315e-120	2.87075e-119	259.604	ACPP
ENSG00000198736	0.00306476	6.81741	24.1814	3.60167e-120	2.93308e-119	259.596	MSRB1
ENSG00000136153	-0.0023341	3.37129	-24.1798	3.7271e-120	3.03352e-119	259.957	LMO7
ENSG00000170892	0.00258928	5.6629	24.1782	3.8555e-120	3.13626e-119	259.491	TSEN34
ENSG00000160013	0.00234854	1.91679	24.1776	3.90518e-120	3.17488e-119	260.016	PTGIR
ENSG00000111358	-0.00138203	3.78898	-24.1753	4.09363e-120	3.32622e-119	259.724	GTF2H3
ENSG00000119041	-0.00119227	4.95279	-24.1697	4.60217e-120	3.73733e-119	259.403	GTF3C3
ENSG00000163069	-0.00282877	1.92802	-24.1662	4.95904e-120	4.02487e-119	260.056	SGCB
ENSG00000112561	0.00178193	4.73214	24.1657	5.00419e-120	4.05923e-119	259.28	TFEB
ENSG00000139324	-0.00140536	3.95308	-24.1651	5.07214e-120	4.11205e-119	259.475	TMTC3
ENSG00000158615	0.000921409	7.46476	24.1634	5.25482e-120	4.25776e-119	259.224	PPP1R15B
ENSG00000152404	-0.00133654	5.39635	-24.1626	5.34984e-120	4.33232e-119	259.213	CWF19L2
ENSG00000110651	-0.00163496	4.85427	-24.1571	5.99751e-120	4.85408e-119	259.168	CD81
ENSG00000001497	-0.00117267	4.38096	-24.1513	6.76972e-120	5.47601e-119	259.098	LAS1L
ENSG00000079277	0.00201316	6.0687	24.15	6.95468e-120	5.62248e-119	258.893	MKNK1
ENSG00000225648	-0.002358	2.44122	-24.143	8.054e-120	6.50758e-119	259.416	SBDSP1
ENSG00000198604	0.0016361	7.56416	24.1428	8.08765e-120	6.53111e-119	258.811	BAZ1A
ENSG00000185115	-0.00128688	4.13266	-24.1405	8.48591e-120	6.84891e-119	258.923	NSMCE3
ENSG00000184113	0.00371548	0.831744	24.1355	9.43235e-120	7.60852e-119	259.202	CLDN5
ENSG00000167785	-0.00167093	4.02585	-24.1325	1.00447e-119	8.09796e-119	258.786	ZNF558
ENSG00000148690	-0.00174866	4.08157	-24.1318	1.01736e-119	8.19728e-119	258.767	FRA10AC1
ENSG00000182173	-0.00220275	3.79332	-24.1291	1.07783e-119	8.67969e-119	258.775	TSEN54
ENSG00000147654	-0.00156357	3.34141	-24.1274	1.1156e-119	8.9788e-119	258.828	EBAG9
ENSG00000225873	0.003228	2.51545	24.1267	1.13204e-119	9.10606e-119	258.748	LINC00694
ENSG00000006744	-0.000957485	5.08162	-24.1246	1.18286e-119	9.50957e-119	258.437	ELAC2
ENSG00000141574	0.00308634	5.71588	24.1227	1.23225e-119	9.90116e-119	258.341	SECTM1
ENSG00000116209	0.00100349	6.72115	24.1216	1.25953e-119	1.01147e-118	258.315	TMEM59
ENSG00000180539	0.00214893	3.26688	24.1185	1.34526e-119	1.07972e-118	258.49	C9orf139
ENSG00000157500	-0.00108254	5.78029	-24.1181	1.35737e-119	1.08883e-118	258.254	APPL1
ENSG00000165006	0.00213374	5.85241	24.1157	1.4274e-119	1.14438e-118	258.181	UBAP1
ENSG00000086200	-0.00119364	4.34912	-24.1144	1.46554e-119	1.1743e-118	258.335	IPO11
ENSG00000099785	0.00315819	6.17222	24.1143	1.46798e-119	1.1756e-118	258.181	2025-03-02
ENSG00000124201	0.00179428	7.87321	24.1125	1.52415e-119	1.21991e-118	258.203	ZNFX1
ENSG00000133103	-0.00136571	4.37337	-24.112	1.54238e-119	1.23382e-118	258.283	COG6
ENSG00000181754	-0.00264791	3.12746	-24.1098	1.61481e-119	1.29105e-118	258.57	AMIGO1
ENSG00000138641	0.00118748	7.09914	24.103	1.86178e-119	1.48767e-118	257.943	HERC3
ENSG00000146263	-0.00132896	4.46154	-24.1027	1.87276e-119	1.49562e-118	258.072	MMS22L
ENSG00000022567	0.00263516	6.48735	24.1008	1.94783e-119	1.55471e-118	257.887	SLC45A4
ENSG00000123505	0.00129224	7.46211	24.1002	1.9705e-119	1.57194e-118	257.91	AMD1
ENSG00000174840	-0.00103426	4.9651	-24.0944	2.22667e-119	1.77532e-118	257.822	PDE12
ENSG00000163545	0.00199048	5.31965	24.0934	2.27185e-119	1.81034e-118	257.724	NUAK2
ENSG00000113966	-0.00256265	1.81111	-24.0931	2.28973e-119	1.82358e-118	258.533	ARL6
ENSG00000196189	0.00276121	5.68446	24.0862	2.6448e-119	2.10521e-118	257.566	SEMA4A
ENSG00000159459	-0.000792754	6.37807	-24.0855	2.683e-119	2.13444e-118	257.548	UBR1
ENSG00000108848	-0.00108413	7.15402	-24.0734	3.45426e-119	2.7465e-118	257.316	LUC7L3
ENSG00000185262	0.0021951	4.32872	24.0715	3.59067e-119	2.85339e-118	257.338	UBALD2
ENSG00000021355	0.00187955	6.97365	24.0692	3.76556e-119	2.99073e-118	257.244	SERPINB1
ENSG00000198034	-0.00134573	8.94589	-24.0587	4.69474e-119	3.72666e-118	257.108	RPS4X
ENSG00000027001	-0.00192814	2.51806	-24.0528	5.3128e-119	4.21495e-118	257.507	MIPEP
ENSG00000170734	-0.00139724	4.70075	-24.0506	5.55663e-119	4.40599e-118	256.953	POLH
ENSG00000143162	0.00272692	5.94527	24.0485	5.80692e-119	4.60192e-118	256.793	CREG1
ENSG00000007237	0.00247156	6.04649	24.0446	6.2967e-119	4.98733e-118	256.7	GAS7
ENSG00000183785	0.00389604	1.87962	24.0433	6.46658e-119	5.11908e-118	257.102	TUBA8
ENSG00000198093	-0.00148662	4.17342	-24.0358	7.56634e-119	5.9864e-118	256.735	ZNF649
ENSG00000171960	-0.00153439	3.5609	-24.0344	7.79101e-119	6.16078e-118	256.836	PPIH
ENSG00000178971	-0.00124104	5.49911	-24.0289	8.74577e-119	6.91198e-118	256.408	CTC1
ENSG00000140367	-0.00137515	4.50345	-24.026	9.27656e-119	7.32747e-118	256.475	UBE2Q2
ENSG00000156860	0.00151878	4.40267	24.0168	1.1242e-118	8.8751e-118	256.205	FBRS
ENSG00000181444	0.00254032	3.00141	24.0159	1.14582e-118	9.04084e-118	256.377	ZNF467
ENSG00000072062	0.00190397	3.7315	24.0133	1.21102e-118	9.55009e-118	256.213	PRKACA
ENSG00000076321	-0.00108798	4.45772	-24.0116	1.25309e-118	9.87648e-118	256.168	KLHL20
ENSG00000256751	0.00291155	3.38768	24.0115	1.25584e-118	9.89271e-118	256.2	PLBD1-AS1
ENSG00000004139	-0.00185752	3.69992	-24.0074	1.36749e-118	1.07664e-117	256.255	SARM1
ENSG00000204304	0.00180188	6.50573	24.002	1.52957e-118	1.20359e-117	255.82	PBX2
ENSG00000118217	0.00152109	7.50882	24.0016	1.54246e-118	1.21308e-117	255.861	ATF6
ENSG00000131236	0.00164109	8.80739	24.0006	1.57726e-118	1.23976e-117	255.94	CAP1
ENSG00000166340	0.00164119	5.10556	23.9998	1.60219e-118	1.25868e-117	255.781	TPP1
ENSG00000185697	-0.0033938	5.63029	-23.9865	2.11604e-118	1.66145e-117	255.573	MYBL1
ENSG00000132623	-0.00271665	2.44854	-23.9838	2.23595e-118	1.75465e-117	256.117	ANKEF1
ENSG00000114648	0.00102794	4.97128	23.9836	2.24579e-118	1.76141e-117	255.458	KLHL18
ENSG00000137054	-0.00176858	3.572	-23.9814	2.34951e-118	1.84176e-117	255.744	POLR1E
ENSG00000269837	-0.00229345	3.0916	-23.976	2.63246e-118	2.06245e-117	255.767	IPO5P1
ENSG00000180104	0.00100676	5.1897	23.9751	2.67904e-118	2.0978e-117	255.27	EXOC3
ENSG00000141551	0.0013392	5.67208	23.9724	2.83441e-118	2.21827e-117	255.194	CSNK1D
ENSG00000158470	0.00290723	6.7577	23.9713	2.89992e-118	2.26831e-117	255.206	B4GALT5
ENSG00000129355	0.00250397	5.73706	23.9651	3.30352e-118	2.58261e-117	255.049	CDKN2D
ENSG00000165359	-0.00100663	5.75984	-23.9624	3.49454e-118	2.73046e-117	255.003	INTS6L
ENSG00000169299	0.00156204	5.91668	23.9619	3.52949e-118	2.75628e-117	254.97	PGM2
ENSG00000104093	0.0020331	8.29028	23.961	3.59922e-118	2.80922e-117	255.081	DMXL2
ENSG00000156508	-0.00163552	12.4253	-23.9577	3.84905e-118	3.00259e-117	255.274	EEF1A1
ENSG00000166881	-0.00142651	4.47197	-23.9555	4.03165e-118	3.14334e-117	255.01	NEMP1
ENSG00000171051	0.00340588	9.13483	23.9511	4.422e-118	3.44582e-117	254.959	FPR1
ENSG00000067082	0.00137848	8.23966	23.9497	4.54704e-118	3.54135e-117	254.833	KLF6
ENSG00000105723	0.00150986	3.58697	23.947	4.81196e-118	3.74566e-117	254.869	GSK3A
ENSG00000101695	-0.00145199	5.2848	-23.9452	4.99116e-118	3.88306e-117	254.695	RNF125
ENSG00000163041	0.00222791	9.52483	23.9449	5.02638e-118	3.90836e-117	254.846	H3F3A
ENSG00000135148	0.00185411	5.8328	23.9436	5.16328e-118	4.01265e-117	254.59	TRAFD1
ENSG00000101596	0.00191617	10.4177	23.943	5.22897e-118	4.06151e-117	254.869	SMCHD1
ENSG00000143797	0.00231834	6.14372	23.9376	5.85802e-118	4.54768e-117	254.479	MBOAT2
ENSG00000284948	0.00282028	3.98871	23.9349	6.18372e-118	4.79794e-117	254.544	NA
ENSG00000149923	0.00160908	5.69112	23.9314	6.657e-118	5.16239e-117	254.347	PPP4C
ENSG00000125459	-0.00182499	3.30318	-23.9288	7.02542e-118	5.44517e-117	254.714	MSTO1
ENSG00000108582	0.00265484	8.14377	23.9284	7.08239e-118	5.48638e-117	254.402	CPD
ENSG00000197122	0.00221975	2.07657	23.9281	7.13034e-118	5.52057e-117	254.776	SRC
ENSG00000168806	-0.00164	3.75338	-23.9277	7.18637e-118	5.56097e-117	254.582	LCMT2
ENSG00000177311	-0.00156108	6.6849	-23.9262	7.41518e-118	5.73496e-117	254.243	ZBTB38
ENSG00000260711	-0.00298281	3.54345	-23.9209	8.279e-118	6.39962e-117	254.53
ENSG00000117298	0.00240474	6.75811	23.9194	8.54533e-118	6.60196e-117	254.121	ECE1
ENSG00000163611	-0.00148514	4.429	-23.9189	8.63116e-118	6.66471e-117	254.262	SPICE1
ENSG00000012822	0.00125472	6.37349	23.9179	8.81485e-118	6.80292e-117	254.062	CALCOCO1
ENSG00000157625	0.000963023	5.69451	23.9164	9.0902e-118	7.01167e-117	254.025	TAB3
ENSG00000254469	-0.00188929	3.41371	-23.9162	9.13832e-118	7.04503e-117	254.429
ENSG00000107099	0.00133013	9.18903	23.9151	9.33956e-118	7.19634e-117	254.186	DOCK8
ENSG00000095383	0.00185676	3.94009	23.913	9.75773e-118	7.51455e-117	254.099	TBC1D2
ENSG00000090487	0.00131379	6.06319	23.9091	1.058e-117	8.14345e-117	253.872	SPG21
ENSG00000197070	0.00127835	4.35768	23.9068	1.11028e-117	8.54129e-117	253.942	ARRDC1
ENSG00000232956	-0.00158432	3.74368	-23.9052	1.14793e-117	8.82624e-117	254.11	SNHG15
ENSG00000134313	0.0010884	7.64362	23.9024	1.21625e-117	9.34657e-117	253.803	KIDINS220
ENSG00000135823	0.00105588	5.95198	23.8989	1.30698e-117	1.00384e-116	253.659	STX6
ENSG00000117151	0.00203662	6.47609	23.8978	1.33742e-117	1.02668e-116	253.658	CTBS
ENSG00000120697	-0.00144046	4.29995	-23.897	1.36102e-117	1.04424e-116	253.823	ALG5
ENSG00000117868	-0.00118297	7.03802	-23.8945	1.43216e-117	1.09824e-116	253.589	ESYT2
ENSG00000137492	-0.00106138	5.97882	-23.8939	1.45114e-117	1.11221e-116	253.582	THAP12
ENSG00000180596	0.00176631	6.07546	23.8908	1.54691e-117	1.18498e-116	253.504	HIST1H2BC
ENSG00000187764	0.0013674	7.10487	23.8868	1.68308e-117	1.28861e-116	253.449	SEMA4D
ENSG00000173041	-0.00209283	3.4212	-23.8864	1.69475e-117	1.29686e-116	253.803	ZNF680
ENSG00000132510	0.00254985	4.82344	23.8831	1.81501e-117	1.38814e-116	253.383	KDM6B
ENSG00000146433	-0.00149866	5.61865	-23.8816	1.87537e-117	1.43329e-116	253.341	TMEM181
ENSG00000068654	-0.00140289	4.36395	-23.8815	1.87601e-117	1.43329e-116	253.489	POLR1A
ENSG00000109756	0.00199747	6.86387	23.8729	2.24703e-117	1.71584e-116	253.155	RAPGEF2
ENSG00000157107	0.00201	5.62784	23.8715	2.30859e-117	1.76192e-116	253.101	FCHO2
ENSG00000166938	-0.00130118	4.6735	-23.8679	2.48847e-117	1.89819e-116	253.157	DIS3L
ENSG00000169220	0.0017569	5.90305	23.8657	2.60609e-117	1.98687e-116	253	RGS14
ENSG00000072518	0.00156472	4.74962	23.8653	2.62803e-117	2.00254e-116	253.015	MARK2
ENSG00000162408	-0.00130889	4.77411	-23.8619	2.82209e-117	2.14928e-116	253.016	NOL9
ENSG00000166669	-0.00195862	4.40049	-23.8606	2.90034e-117	2.20771e-116	253.07	ATF7IP2
ENSG00000169228	0.00204277	5.80695	23.8584	3.03589e-117	2.30967e-116	252.826	RAB24
ENSG00000215301	0.00122793	9.29173	23.8549	3.26164e-117	2.48012e-116	252.944	DDX3X
ENSG00000169084	0.00175523	3.97475	23.854	3.32308e-117	2.5255e-116	252.871	DHRSX
ENSG00000155961	-0.00148019	3.6271	-23.8538	3.33969e-117	2.5368e-116	253.069	RAB39B
ENSG00000123600	-0.00223062	4.07158	-23.851	3.53688e-117	2.68517e-116	252.94	METTL8
ENSG00000167077	-0.00189908	3.53082	-23.8494	3.65587e-117	2.77405e-116	253.012	MEI1
ENSG00000141968	0.0015006	7.11619	23.8493	3.66518e-117	2.77965e-116	252.673	VAV1
ENSG00000155158	-0.0018446	5.48692	-23.8465	3.88189e-117	2.94246e-116	252.641	TTC39B
ENSG00000181896	-0.00127046	6.11175	-23.8453	3.98304e-117	3.01755e-116	252.57	ZNF101
ENSG00000111196	-0.00187794	3.11661	-23.8419	4.27187e-117	3.23467e-116	252.957	MAGOHB
ENSG00000196961	0.00291667	6.0989	23.833	5.13589e-117	3.88687e-116	252.329	AP2A1
ENSG00000080561	-0.00311524	2.88585	-23.8317	5.27132e-117	3.98728e-116	252.866	MID2
ENSG00000072609	0.000932976	5.63879	23.8312	5.33039e-117	4.02985e-116	252.263	CHFR
ENSG00000176928	-0.00279447	4.75036	-23.8301	5.45017e-117	4.11826e-116	252.427	GCNT4
ENSG00000146143	-0.0013511	3.81422	-23.8218	6.47443e-117	4.88965e-116	252.357	PRIM2
ENSG00000144848	0.0012415	5.84467	23.8207	6.63463e-117	5.00802e-116	252.041	ATG3
ENSG00000181274	0.00275834	7.38981	23.8118	7.97658e-117	6.01782e-116	251.932	FRAT2
ENSG00000129003	-0.00105031	8.93118	-23.802	9.76855e-117	7.36591e-116	251.781	VPS13C
ENSG00000111913	0.00165394	9.69519	23.8017	9.81745e-117	7.39892e-116	251.881	FAM65B
ENSG00000112182	-0.00289774	5.01377	-23.8005	1.00777e-116	7.59109e-116	251.772	BACH2
ENSG00000203804	0.00255564	4.11545	23.7973	1.07541e-116	8.09637e-116	251.666	ADAMTSL4-AS1
ENSG00000084733	0.00102423	6.85093	23.7888	1.28347e-116	9.65774e-116	251.404	RAB10
ENSG00000162736	0.00159293	4.72489	23.7879	1.30683e-116	9.82844e-116	251.412	NCSTN
ENSG00000134982	0.00118712	7.29626	23.7853	1.38009e-116	1.0374e-115	251.356	APC
ENSG00000139318	0.00199872	6.92579	23.7845	1.40406e-116	1.05487e-115	251.33	DUSP6
ENSG00000177105	0.00223519	5.5542	23.7815	1.49207e-116	1.12041e-115	251.246	RHOG
ENSG00000168214	0.00163088	7.10486	23.7793	1.56266e-116	1.17281e-115	251.227	RBPJ
ENSG00000163608	-0.000945927	5.16504	-23.777	1.63919e-116	1.22961e-115	251.208	NEPRO
ENSG00000158710	0.00264484	8.41961	23.7756	1.6873e-116	1.26503e-115	251.257	TAGLN2
ENSG00000180917	-0.0013555	5.45479	-23.7719	1.81938e-116	1.36336e-115	251.093	CMTR2
ENSG00000150768	-0.00134441	3.71702	-23.7713	1.84245e-116	1.37993e-115	251.338	DLAT
ENSG00000163577	-0.00244674	2.50584	-23.76	2.32925e-116	1.74362e-115	251.423	EIF5A2
ENSG00000171566	-0.00113393	4.87894	-23.7565	2.50203e-116	1.87199e-115	250.821	PLRG1
ENSG00000164483	-0.00288178	5.47755	-23.7547	2.5965e-116	1.94167e-115	250.762	SAMD3
ENSG00000280128	-0.00209985	4.2546	-23.753	2.6914e-116	2.01159e-115	250.872
ENSG00000130725	0.00185419	4.32777	23.7524	2.72555e-116	2.03606e-115	250.716	UBE2M
ENSG00000241490	-0.00323968	2.00382	-23.7522	2.73485e-116	2.04159e-115	251.434
ENSG00000136026	0.00267937	5.37064	23.7522	2.73577e-116	2.04159e-115	250.635	CKAP4
ENSG00000148572	0.00245436	6.09949	23.7517	2.76781e-116	2.06443e-115	250.624	NRBF2
ENSG00000163935	-0.00194962	3.97852	-23.7514	2.78395e-116	2.0754e-115	250.894	SFMBT1
ENSG00000058799	0.00163616	4.73762	23.7498	2.87441e-116	2.14173e-115	250.621	YIPF1
ENSG00000143436	-0.00151342	3.38752	-23.7493	2.90678e-116	2.16473e-115	250.96	MRPL9
ENSG00000125347	0.00194443	9.03815	23.7488	2.93607e-116	2.18542e-115	250.741	IRF1
ENSG00000181029	0.00183913	4.83228	23.7481	2.97794e-116	2.21545e-115	250.6	TRAPPC5
ENSG00000109133	0.00123393	6.64953	23.7465	3.08023e-116	2.29036e-115	250.523	TMEM33
ENSG00000113732	0.00123034	6.71441	23.746	3.11396e-116	2.31425e-115	250.516	ATP6V0E1
ENSG00000198858	0.00358327	7.949	23.7432	3.29765e-116	2.44951e-115	250.572	R3HDM4
ENSG00000281649	-0.000938994	6.34628	-23.7412	3.43371e-116	2.54927e-115	250.41	EBLN3
ENSG00000005238	0.00253478	5.5827	23.7341	3.98178e-116	2.95465e-115	250.265	FAM214B
ENSG00000137752	0.00173176	7.29446	23.7229	5.01643e-116	3.7205e-115	250.078	CASP1
ENSG00000005700	-0.00101297	5.71333	-23.7205	5.27186e-116	3.90794e-115	250.002	IBTK
ENSG00000135597	-0.00103054	5.39011	-23.72	5.32919e-116	3.94841e-115	250.01	REPS1
ENSG00000151353	-0.00135124	4.00245	-23.707	6.96051e-116	5.15442e-115	249.949	TMEM18
ENSG00000113360	-0.0014618	4.187	-23.7042	7.3813e-116	5.46322e-115	249.858	DROSHA
ENSG00000132879	-0.00203472	2.82685	-23.7033	7.52051e-116	5.5634e-115	250.16	FBXO44
ENSG00000250334	0.0038078	3.34283	23.7024	7.65567e-116	5.66049e-115	249.802	LINC00989
ENSG00000135049	0.00146722	7.62876	23.7012	7.85646e-116	5.80599e-115	249.647	AGTPBP1
ENSG00000175768	-0.00210668	3.03338	-23.6976	8.45139e-116	6.24246e-115	250.001	TOMM5
ENSG00000174444	-0.00149662	9.39025	-23.694	9.10966e-116	6.72523e-115	249.579	RPL4
ENSG00000151806	-0.00132808	4.29103	-23.69	9.8899e-116	7.29753e-115	249.544	GUF1
ENSG00000073331	0.00262071	7.24115	23.6874	1.04385e-115	7.69841e-115	249.352	ALPK1
ENSG00000158828	0.00317521	6.90639	23.6859	1.07684e-115	7.93762e-115	249.317	PINK1
ENSG00000174842	-0.00201531	2.5757	-23.6834	1.13463e-115	8.35936e-115	249.818	GLMN
ENSG00000033170	-0.00176893	4.55526	-23.6799	1.21936e-115	8.97905e-115	249.307	FUT8
ENSG00000160991	0.00227758	6.51811	23.6776	1.27841e-115	9.4091e-115	249.11	ORAI2
ENSG00000175029	0.00169426	5.71129	23.6751	1.34497e-115	9.89394e-115	249.035	CTBP2
ENSG00000100852	-0.00159473	6.07403	-23.6729	1.40951e-115	1.03634e-114	249.022	ARHGAP5
ENSG00000064932	0.0026826	6.08319	23.665	1.65758e-115	1.21811e-114	248.868	SBNO2
ENSG00000124275	-0.00129153	4.70905	-23.6633	1.71749e-115	1.2615e-114	248.923	MTRR
ENSG00000158156	0.00213654	4.67161	23.6631	1.72344e-115	1.26523e-114	248.84	XKR8
ENSG00000203709	0.00125777	7.33306	23.6626	1.73982e-115	1.2766e-114	248.829	C1orf132
ENSG00000113851	-0.00102382	6.32492	-23.661	1.79963e-115	1.31982e-114	248.76	CRBN
ENSG00000185359	0.0011895	5.09781	23.6568	1.96349e-115	1.43926e-114	248.699	HGS
ENSG00000161791	-0.00169604	4.68814	-23.6527	2.13779e-115	1.56623e-114	248.718	FMNL3
ENSG00000151690	-0.00130817	5.33962	-23.6513	2.20059e-115	1.61142e-114	248.601	MFSD6
ENSG00000169918	-0.00335497	1.94709	-23.648	2.35339e-115	1.72244e-114	249.321	OTUD7A
ENSG00000151065	-0.00165112	3.31042	-23.6471	2.39621e-115	1.7529e-114	248.881	DCP1B
ENSG00000185187	-0.00139985	4.3376	-23.6461	2.44624e-115	1.78859e-114	248.631	SIGIRR
ENSG00000113916	0.00315609	7.36486	23.6453	2.49004e-115	1.81969e-114	248.5	BCL6
ENSG00000105993	0.00123874	6.55277	23.6429	2.61164e-115	1.9076e-114	248.383	DNAJB6
ENSG00000173535	0.00318842	8.39578	23.6373	2.93357e-115	2.14165e-114	248.408	TNFRSF10C
ENSG00000057704	0.00278345	6.44122	23.6316	3.29642e-115	2.40534e-114	248.164	TMCC3
ENSG00000159917	-0.00148448	3.87739	-23.6218	4.04126e-115	2.94735e-114	248.223	ZNF235
ENSG00000213246	0.00139091	5.43668	23.6197	4.2129e-115	3.07097e-114	247.901	SUPT4H1
ENSG00000167642	0.00145131	4.76022	23.6181	4.35813e-115	3.17524e-114	247.916	SPINT2
ENSG00000149925	0.00150713	7.27473	23.6178	4.38386e-115	3.19237e-114	247.91	ALDOA
ENSG00000117335	0.00164501	8.85572	23.6135	4.78599e-115	3.48346e-114	247.935	CD46
ENSG00000087460	0.00191673	8.37581	23.6096	5.18526e-115	3.77217e-114	247.828	GNAS
ENSG00000204482	0.00202857	7.01948	23.6009	6.20697e-115	4.51317e-114	247.554	LST1
ENSG00000101384	0.00226675	2.46971	23.5987	6.49739e-115	4.72196e-114	247.88	JAG1
ENSG00000269825	-0.00222478	3.70821	-23.5968	6.75897e-115	4.90959e-114	247.771
ENSG00000105063	0.00137624	5.85203	23.5967	6.7677e-115	4.91346e-114	247.439	PPP6R1
ENSG00000166860	-0.00146334	3.69533	-23.5964	6.81569e-115	4.94582e-114	247.741	ZBTB39
ENSG00000025708	0.00276338	6.82959	23.5922	7.42125e-115	5.38255e-114	247.385	TYMP
ENSG00000115233	-0.00130664	4.05915	-23.5915	7.53457e-115	5.46199e-114	247.558	PSMD14
ENSG00000171049	0.00349577	7.60162	23.5842	8.75741e-115	6.34528e-114	247.264	FPR2
ENSG00000187266	0.00239596	2.32745	23.5788	9.78964e-115	7.08964e-114	247.475	EPOR
ENSG00000167173	0.00238736	4.91099	23.573	1.1012e-114	7.97092e-114	246.987	C15orf39
ENSG00000224032	-0.00163443	3.53953	-23.5716	1.13487e-114	8.21047e-114	247.273	EPB41L4A-AS1
[truncated: 12,457 more rows]

## Sheet: RNAseq_SII
e-Table 4: RNA-seq analysis of SII
	ensemble	logFC	AveExpr	t	P.Value	adj.P.Val	B	symbol
1	ENSG00000003402	0.000481257	9.74487	45.8524	0	0	821.506	CFLAR
2	ENSG00000062716	0.000541173	8.55139	45.3081	0	0	805.465	VMP1
3	ENSG00000109466	0.000642355	5.87768	46.551	0	0	841.94	KLHL2
4	ENSG00000111371	-0.000367094	8.20621	-43.1241	0	0	741.845	SLC38A1
5	ENSG00000113263	-0.000449315	7.60181	-43.7248	0	0	759.218	ITK
6	ENSG00000115590	0.000993271	5.74903	44.2567	0	0	774.686	IL1R2
7	ENSG00000118922	-0.000491502	7.01998	-47.2233	0	0	861.856	KLF12
8	ENSG00000132155	0.000467222	7.73066	42.8085	0	0	732.788	RAF1
9	ENSG00000132825	0.000443021	5.16039	43.6348	0	0	756.594	PPP1R3D
10	ENSG00000135905	-0.000338098	7.93714	-42.6471	0	0	728.1	DOCK10
11	ENSG00000145375	-0.000425619	4.77715	-43.6237	0	0	756.448	SPATA5
12	ENSG00000152213	0.000542108	5.63179	45.9578	0	0	824.44	ARL11
13	ENSG00000155099	0.000574213	5.42804	42.8839	0	0	734.904	TMEM55A
14	ENSG00000163162	0.000601504	8.80055	44.3489	0	0	777.459	RNF149
15	ENSG00000167193	0.000336634	5.94004	44.4852	0	0	781.297	CRK
16	ENSG00000170989	-0.000468445	6.93123	-43.0412	0	0	739.461	S1PR1
17	ENSG00000172575	-0.00048222	6.33134	-45.9101	0	0	823.09	RASGRP1
18	ENSG00000177125	0.000474761	6.77204	43.0009	0	0	738.29	ZBTB34
19	ENSG00000274536	0.000605657	8.91497	42.6576	0	0	728.521	MIR223
20	ENSG00000085788	-0.000379725	5.3486	-42.5568	0	0	725.594	DDHD2
21	ENSG00000257093	-0.000379841	6.61618	-42.3619	0	0	719.922	KIAA1147
22	ENSG00000167984	-0.00042352	6.15597	-42.3604	0	0	719.902	NLRC3
23	ENSG00000112062	0.000549865	8.16104	42.3356	0	0	719.231	MAPK14
24	ENSG00000122224	-0.000495082	5.08215	-42.3185	0	0	718.811	LY9
25	ENSG00000134954	-0.0003845	8.6222	-42.2349	0	0	716.289	ETS1
26	ENSG00000127152	-0.000487915	6.86694	-42.0351	0	0	710.572	BCL11B
27	ENSG00000065615	0.00042349	7.06828	42.0283	0	0	710.369	CYB5R4
28	ENSG00000155561	-0.000298092	6.20715	-42.0111	0	0	709.875	NUP205
29	ENSG00000143384	0.00044207	10.5826	41.9765	0	0	709.076	MCL1
30	ENSG00000168421	-0.000434688	5.84426	-41.8205	0	0	704.476	RHOH
31	ENSG00000027075	-0.000386519	7.42101	-41.6493	0	0	699.533	PRKCH
32	ENSG00000082512	-0.000449241	5.95703	-41.5687	0	0	697.296	TRAF5
33	ENSG00000173281	0.000715996	7.28432	41.5495	0	3.38362e-308	696.738	PPP1R3B
34	ENSG00000174125	0.000605377	8.50251	41.4755	0	2.69647e-307	694.682	TLR1
35	ENSG00000196405	-0.000406936	7.50987	-41.3993	0	2.29538e-306	692.416	EVL
36	ENSG00000127334	-0.000379857	7.25418	-41.3394	3.05155e-308	1.22528e-305	690.717	DYRK2
37	ENSG00000136869	0.000670775	9.02088	41.275	1.90121e-307	7.42756e-305	689.017	TLR4
38	ENSG00000156642	0.000375395	5.87934	41.2566	3.21256e-307	1.22204e-304	688.342	NPTN
39	ENSG00000076685	0.000447979	7.40755	41.1842	2.50869e-306	9.29824e-304	686.335	NT5C2
40	ENSG00000114316	0.000368067	7.17644	41.1806	2.77899e-306	1.00426e-303	686.217	USP4
41	ENSG00000155926	0.000467074	8.66737	41.0314	1.91782e-304	6.76148e-302	682.064	SLA
42	ENSG00000161405	-0.000501722	7.25136	-40.9929	5.70764e-304	1.96438e-301	680.894	IKZF3
43	ENSG00000159128	0.00052626	7.13524	40.9151	5.16832e-303	1.7374e-300	678.704	IFNGR2
44	ENSG00000188895	0.000540336	7.77371	40.8897	1.06297e-302	3.49211e-300	678.011	MSL1
45	ENSG00000147138	-0.000542261	6.21859	-40.8799	1.40027e-302	4.49799e-300	677.741	GPR174
46	ENSG00000150403	0.000416973	5.4371	40.769	3.23105e-301	1.0051e-298	674.527	TMCO3
47	ENSG00000143226	0.000692903	9.68558	40.7686	3.26805e-301	1.0051e-298	674.706	FCGR2A
48	ENSG00000175538	0.000542502	7.03631	40.7272	1.05611e-300	3.18044e-298	673.383	KCNE3
49	ENSG00000165030	0.000652753	5.24092	40.6932	2.7581e-300	8.13641e-298	672.397	NFIL3
50	ENSG00000113269	0.000479381	7.51373	40.61	2.89159e-299	8.35959e-297	670.089	RNF130
51	ENSG00000078618	0.000368724	7.51343	40.5876	5.44489e-299	1.54325e-296	669.446	NRDC
52	ENSG00000137462	0.000734733	8.47371	40.5171	3.98981e-298	1.10909e-295	667.537	TLR2
53	ENSG00000206344	0.00062509	6.7954	40.4921	8.05621e-298	2.19722e-295	666.746	HCG27
54	ENSG00000119285	-0.000339953	6.06431	-40.4491	2.7134e-297	7.26336e-295	665.54	HEATR1
55	ENSG00000153107	-0.000310598	5.90177	-40.4405	3.4559e-297	9.08273e-295	665.299	ANAPC1
56	ENSG00000163393	0.000617055	5.4486	40.3615	3.20155e-296	8.26399e-294	663.037	SLC22A15
57	ENSG00000284930	0.000640492	3.71115	40.34	5.87839e-296	1.49074e-293	662.497	NA
58	ENSG00000067082	0.00032638	8.23966	40.3288	8.05312e-296	2.00703e-293	662.179	KLF6
59	ENSG00000133318	0.000558308	6.76627	40.3099	1.369e-295	3.35404e-293	661.606	RTN3
60	ENSG00000059377	0.000531244	7.47448	40.2823	2.98407e-295	7.08134e-293	660.854	TBXAS1
61	ENSG00000198223	0.000567503	6.00435	40.2822	2.98832e-295	7.08134e-293	660.807	CSF2RA
62	ENSG00000113719	0.000570021	7.30426	40.2547	6.48384e-295	1.51168e-292	660.074	ERGIC1
63	ENSG00000165879	0.000596991	5.93678	40.2503	7.33436e-295	1.68283e-292	659.912	FRAT1
64	ENSG00000196305	-0.000319179	6.13308	-40.2207	1.68688e-294	3.80998e-292	659.099	IARS
65	ENSG00000109743	0.000589452	5.75869	40.1972	3.27298e-294	7.27861e-292	658.412	BST1
66	ENSG00000097033	0.000409924	7.21199	40.1903	3.97284e-294	8.70112e-292	658.242	SH3GLB1
67	ENSG00000138434	0.000369018	6.81412	40.1765	5.85648e-294	1.26351e-291	657.837	SSFA2
68	ENSG00000167995	0.000664054	5.29646	40.1593	9.48267e-294	2.01576e-291	657.353	BEST1
69	ENSG00000148572	0.000586818	6.09949	40.1164	3.16634e-293	6.63324e-291	656.148	NRBF2
70	ENSG00000109381	0.000310494	6.88193	40.1029	4.63674e-293	9.57487e-291	655.766	ELF2
71	ENSG00000118217	0.000387155	7.50882	40.0956	5.6849e-293	1.1574e-290	655.592	ATF6
72	ENSG00000138185	0.00060743	7.6126	40.0265	3.9659e-292	7.9621e-290	653.676	ENTPD1
73	ENSG00000198589	-0.000318724	7.962	-40.0246	4.18161e-292	8.28017e-290	653.572	LRBA
74	ENSG00000196954	0.000473943	7.84667	39.8894	1.85552e-290	3.62452e-288	649.83	CASP4
75	ENSG00000101916	0.000615234	7.83798	39.8796	2.44202e-290	4.70658e-288	649.568	TLR8
76	ENSG00000084110	0.000708907	6.09792	39.8594	4.30357e-290	8.18527e-288	648.945	HAL
77	ENSG00000103569	0.000818751	8.94494	39.8465	6.18119e-290	1.16038e-287	648.718	AQP9
78	ENSG00000151726	0.000934635	9.60235	39.8436	6.70014e-290	1.24167e-287	648.687	ACSL1
79	ENSG00000122188	-0.000511599	4.39359	-39.8292	1.00272e-289	1.83472e-287	648.33	LAX1
80	ENSG00000170871	0.000416693	7.52942	39.8154	1.47726e-289	2.66922e-287	647.736	KIAA0232
81	ENSG00000153310	0.000386783	7.79403	39.8065	1.8952e-289	3.38211e-287	647.496	FAM49B
82	ENSG00000102218	0.000480148	6.39675	39.7861	3.35977e-289	5.92262e-287	646.88	RP2
83	ENSG00000186431	0.000747275	4.81654	39.7588	7.21315e-289	1.25622e-286	646.128	FCAR
84	ENSG00000153283	-0.00045018	6.66278	-39.689	5.09153e-288	8.76167e-286	644.188	CD96
85	ENSG00000116984	-0.000311705	6.53392	-39.6863	5.49237e-288	9.34026e-286	644.093	MTR
86	ENSG00000113648	0.000339747	8.36322	39.6557	1.29389e-287	2.17478e-285	643.299	H2AFY
87	ENSG00000115271	0.000752114	8.47522	39.6403	1.98947e-287	3.30549e-285	642.913	GCA
88	ENSG00000136040	0.000650687	9.05468	39.6378	2.13286e-287	3.50346e-285	642.866	PLXNC1
89	ENSG00000163235	0.000689673	4.71283	39.5059	8.52263e-286	1.38421e-283	639.056	TGFA
90	ENSG00000188315	0.000506449	4.6503	39.4467	4.44923e-285	7.14596e-283	637.401	C3orf62
91	ENSG00000100485	0.000468504	6.96027	39.4448	4.68986e-285	7.44966e-283	637.356	SOS2
92	ENSG00000107679	-0.000450179	5.92299	-39.4343	6.28193e-285	9.87014e-283	637.111	PLEKHA1
93	ENSG00000185950	0.000630606	4.8555	39.3306	1.13314e-283	1.76124e-281	634.161	IRS2
94	ENSG00000123836	0.000592363	4.56794	39.2604	8.01851e-283	1.23306e-280	632.214	PFKFB2
95	ENSG00000113916	0.000803171	7.36486	39.2066	3.58615e-282	5.45662e-280	630.766	BCL6
96	ENSG00000174130	0.000592861	7.42258	39.1915	5.46515e-282	8.22904e-280	630.327	TLR6
97	ENSG00000120910	-0.000432869	5.16455	-39.1603	1.30364e-281	1.9427e-279	629.532	PPP3CC
98	ENSG00000175471	0.000491101	6.14957	39.112	4.99437e-281	7.3667e-279	628.066	MCTP1
99	ENSG00000243646	0.000431281	6.27542	39.1065	5.81664e-281	8.49288e-279	627.912	IL10RB
100	ENSG00000173334	0.0005396	4.95445	39.076	1.35768e-280	1.96253e-278	627.07	TRIB1
101	ENSG00000011198	0.000672951	7.19851	39.0654	1.82541e-280	2.6125e-278	626.818	ABHD5
102	ENSG00000160593	0.000488021	9.55492	39.0434	3.36704e-280	4.77163e-278	626.31	JAML
103	ENSG00000166900	0.000640362	7.13092	38.9672	2.79095e-279	3.91681e-277	624.086	STX3
104	ENSG00000101265	0.000541531	9.63327	38.8993	1.83828e-278	2.55504e-276	622.322	RASSF2
105	ENSG00000139178	0.000504992	5.27786	38.8788	3.25325e-278	4.47865e-276	621.587	C1RL
106	ENSG00000188042	-0.00041252	6.93776	-38.8675	4.44366e-278	6.05973e-276	621.291	ARL4C
107	ENSG00000121316	0.000656256	7.72032	38.8597	5.52329e-278	7.4616e-276	621.132	PLBD1
108	ENSG00000116793	0.000394682	4.50405	38.8522	6.80778e-278	9.11171e-276	620.875	PHTF1
109	ENSG00000114268	0.000640895	5.85101	38.8181	1.75078e-277	2.32179e-275	619.915	PFKFB4
110	ENSG00000158615	0.000226029	7.46476	38.8114	2.10871e-277	2.77104e-275	619.74	PPP1R15B
111	ENSG00000072858	-0.000443843	5.0626	-38.8054	2.48802e-277	3.24003e-275	619.695	SIDT1
112	ENSG00000143207	0.000376713	7.21777	38.7841	4.49649e-277	5.80328e-275	618.987	RFWD2
113	ENSG00000079277	0.000483149	6.0687	38.7809	4.90622e-277	6.27605e-275	618.874	MKNK1
114	ENSG00000116991	0.000854339	5.58016	38.7051	4.00488e-276	5.07812e-274	616.795	SIPA1L2
115	ENSG00000171862	0.000506883	9.07335	38.7046	4.06974e-276	5.11549e-274	616.886	PTEN
116	ENSG00000136404	0.000521953	4.67166	38.6433	2.21918e-275	2.76536e-273	615.079	TM6SF1
117	ENSG00000120129	0.000728118	7.36107	38.6331	2.94216e-275	3.63495e-273	614.846	DUSP1
118	ENSG00000154845	0.000552943	7.35086	38.6298	3.22695e-275	3.95301e-273	614.736	PPP4R1
119	ENSG00000184787	-0.00022551	6.12735	-38.616	4.72594e-275	5.74063e-273	614.32	UBE2G2
120	ENSG00000119401	-0.00044034	3.61581	-38.5936	8.77166e-275	1.05662e-272	614.067	TRIM32
121	ENSG00000144909	0.000356334	6.24329	38.5868	1.05918e-274	1.25536e-272	613.497	OSBPL11
122	ENSG00000120800	-0.00039357	4.90075	-38.5868	1.05952e-274	1.25536e-272	613.656	UTP20
123	ENSG00000139132	0.000555289	6.19975	38.5826	1.18958e-274	1.398e-272	613.394	FGD4
124	ENSG00000140044	0.000527067	4.34944	38.5751	1.4634e-274	1.70592e-272	613.212	JDP2
125	ENSG00000135766	0.000558783	6.9193	38.5717	1.60579e-274	1.85693e-272	613.114	EGLN1
126	ENSG00000085511	-0.000297697	5.57737	-38.535	4.42984e-274	5.08202e-272	612.13	MAP3K4
127	ENSG00000213903	0.000547157	5.40374	38.4968	1.2727e-273	1.44857e-271	611.018	LTB4R
128	ENSG00000105835	0.000757801	11.4449	38.4808	1.97976e-273	2.23574e-271	610.875	NAMPT
129	ENSG00000173171	0.000511449	5.17938	38.4641	3.14563e-273	3.52481e-271	610.115	MTX1
130	ENSG00000166523	0.000826985	5.67644	38.438	6.46805e-273	7.19197e-271	609.411	CLEC4E
131	ENSG00000006652	0.000535502	6.7117	38.4303	7.99511e-273	8.82209e-271	609.199	IFRD1
132	ENSG00000116701	0.000572468	9.51331	38.3936	2.20041e-272	2.40962e-270	608.33	NCF2
133	ENSG00000197208	0.000706991	4.8318	38.3875	2.60351e-272	2.82961e-270	608.016	SLC22A4
134	ENSG00000157557	0.00055257	5.95794	38.3869	2.64834e-272	2.85685e-270	607.985	ETS2
135	ENSG00000162739	-0.000463713	5.54284	-38.3829	2.9573e-272	3.1665e-270	607.967	SLAMF6
136	ENSG00000163694	0.000681998	6.31697	38.3738	3.79885e-272	4.03767e-270	607.642	RBM47
137	ENSG00000181274	0.000630576	7.38981	38.3701	4.20657e-272	4.4384e-270	607.576	FRAT2
138	ENSG00000021355	0.000451143	6.97365	38.2931	3.52339e-271	3.69062e-269	605.418	SERPINB1
139	ENSG00000123700	0.000729556	7.09424	38.2848	4.42689e-271	4.60364e-269	605.218	KCNJ2
140	ENSG00000174197	-0.000229251	7.22776	-38.2736	6.01972e-271	6.21536e-269	604.859	MGA
141	ENSG00000144118	0.000575035	6.77835	38.26	8.77179e-271	8.99264e-269	604.51	RALB
142	ENSG00000136867	0.000627011	6.36774	38.2328	1.85424e-270	1.88753e-268	603.753	SLC31A2
143	ENSG00000155744	0.000614274	7.67681	38.227	2.17743e-270	2.20103e-268	603.64	FAM126B
144	ENSG00000165071	0.000451468	7.0222	38.2202	2.62686e-270	2.63689e-268	603.411	TMEM71
145	ENSG00000135108	-0.000308239	4.98121	-38.2036	4.14552e-270	4.13265e-268	603.051	FBXO21
146	ENSG00000123684	0.000403614	7.77727	38.2028	4.232e-270	4.18997e-268	602.962	LPGAT1
147	ENSG00000080815	0.000341682	7.28633	38.1932	5.5191e-270	5.42712e-268	602.67	PSEN1
148	ENSG00000115561	0.000277548	6.38374	38.169	1.07353e-269	1.0485e-267	601.973	CHMP3
149	ENSG00000115828	0.000773936	6.44635	38.1687	1.08342e-269	1.05106e-267	602.003	QPCT
150	ENSG00000177410	0.000424254	5.75731	38.1607	1.34941e-269	1.30038e-267	601.744	ZFAS1
151	ENSG00000119535	0.000704521	9.83347	38.1316	3.00379e-269	2.87548e-267	601.146	CSF3R
152	ENSG00000148841	0.000534943	6.637	38.1199	4.14939e-269	3.94602e-267	600.647	ITPRIP
153	ENSG00000141293	-0.000520737	3.91852	-38.0865	1.04029e-268	9.82835e-267	600.044	SKAP1
154	ENSG00000158470	0.000655823	6.7577	38.0503	2.81581e-268	2.64303e-266	598.746	B4GALT5
155	ENSG00000058799	0.000371078	4.73762	38.0274	5.27118e-268	4.9158e-266	598.103	YIPF1
156	ENSG00000110422	0.000386047	8.32281	38.0101	8.48173e-268	7.85919e-266	597.688	HIPK3
157	ENSG00000110934	0.00028342	8.05134	37.9906	1.45233e-267	1.33716e-265	597.13	BIN2
158	ENSG00000124181	-0.000443138	6.40016	-37.9894	1.49752e-267	1.37004e-265	597.081	PLCG1
159	ENSG00000151948	0.000688869	6.23644	37.9854	1.67551e-267	1.52324e-265	596.951	GLT1D1
160	ENSG00000066933	-0.000299266	6.13715	-37.9757	2.18127e-267	1.97065e-265	596.696	MYO9A
161	ENSG00000179456	0.000342306	6.39936	37.9579	3.5637e-267	3.19959e-265	596.174	ZBTB18
162	ENSG00000198585	0.000393747	5.66952	37.9245	8.89606e-267	7.93781e-265	595.255	NUDT16
163	ENSG00000101150	0.000424239	6.62758	37.9192	1.03147e-266	9.14719e-265	595.125	TPD52L2
164	ENSG00000136156	0.000506909	10.0216	37.9134	1.20887e-266	1.0655e-264	595.139	ITM2B
165	ENSG00000217128	0.000459527	7.03988	37.913	1.22205e-266	1.07059e-264	594.971	FNIP1
166	ENSG00000277734	-0.000513902	7.18636	-37.9012	1.68621e-266	1.46833e-264	594.649	TRAC
167	ENSG00000124177	-0.00027553	6.66111	-37.8119	1.95511e-265	1.69228e-263	592.178	CHD6
168	ENSG00000142405	0.0006394	6.78164	37.8056	2.32498e-265	2.00045e-263	592.035	NLRP12
169	ENSG00000069493	-0.000425731	7.51868	-37.7847	4.11576e-265	3.52031e-263	591.447	CLEC2D
170	ENSG00000091317	0.000486037	8.4192	37.7726	5.74086e-265	4.88142e-263	591.188	CMTM6
171	ENSG00000132405	0.000468262	7.35	37.7631	7.45066e-265	6.29821e-263	590.876	TBC1D14
172	ENSG00000225873	0.000700628	2.51545	37.7605	7.98662e-265	6.71201e-263	590.952	LINC00694
173	ENSG00000169180	0.000580398	8.73884	37.7601	8.07692e-265	6.74866e-263	590.875	XPO6
174	ENSG00000012779	0.000588335	7.65351	37.7544	9.46014e-265	7.85899e-263	590.664	ALOX5
175	ENSG00000104763	0.000455305	8.2724	37.737	1.51965e-264	1.25523e-262	590.206	ASAH1
176	ENSG00000100504	0.000749098	8.06795	37.7366	1.53805e-264	1.26321e-262	590.212	PYGL
177	ENSG00000186205	0.000778697	5.09894	37.7007	4.11168e-264	3.35788e-262	589.145	2025-03-01
178	ENSG00000183255	0.000342418	7.08854	37.6879	5.8283e-264	4.73303e-262	588.799	PTTG1IP
179	ENSG00000065675	-0.000421583	5.70497	-37.6746	8.39543e-264	6.77966e-262	588.49	PRKCQ
180	ENSG00000140262	-0.000223457	5.9314	-37.5956	7.28248e-263	5.84823e-261	586.279	TCF12
181	ENSG00000118564	0.000483284	8.87557	37.5882	8.91389e-263	7.1188e-261	586.169	FBXL5
182	ENSG00000110931	0.000469661	6.30139	37.5864	9.37579e-263	7.44654e-261	586.009	CAMKK2
183	ENSG00000125735	0.00049331	5.55881	37.5692	1.49954e-262	1.18447e-260	585.532	TNFSF14
184	ENSG00000278600	0.000513605	5.28152	37.565	1.68272e-262	1.32194e-260	585.419
185	ENSG00000005893	0.000507461	8.16027	37.5395	3.37574e-262	2.63764e-260	584.803	LAMP2
186	ENSG00000121060	0.000601015	7.56378	37.5347	3.8478e-262	2.99032e-260	584.654	TRIM25
187	ENSG00000182022	0.000618907	8.1593	37.5161	6.40293e-262	4.94943e-260	584.175	CHST15
188	ENSG00000124203	-0.000460886	5.71823	-37.4911	1.26563e-261	9.73118e-260	583.482	ZNF831
189	ENSG00000134698	0.000473392	7.85925	37.4114	1.11437e-260	8.52287e-259	581.291	AGO4
190	ENSG00000134830	0.000609628	6.66618	37.3914	1.9231e-260	1.46307e-258	580.708	C5AR2
191	ENSG00000134759	-0.00029756	5.82375	-37.3905	1.97096e-260	1.49163e-258	580.7	ELP2
192	ENSG00000111052	0.000655236	5.94101	37.39	2.00018e-260	1.50586e-258	580.655	LIN7A
193	ENSG00000180509	0.000664421	3.50902	37.3092	1.80984e-259	1.3555e-257	578.528	KCNE1
194	ENSG00000096063	0.000516778	6.26473	37.3051	2.01965e-259	1.50485e-257	578.338	SRPK1
195	ENSG00000130449	0.00034173	5.69287	37.2756	4.51162e-259	3.34438e-257	577.519	ZSWIM6
196	ENSG00000083223	0.000441111	8.37064	37.2547	7.98398e-259	5.88818e-257	577.043	ZCCHC6
197	ENSG00000168461	0.000565315	7.43557	37.2365	1.30948e-258	9.60841e-257	576.515	RAB31
198	ENSG00000087157	0.000518691	6.54264	37.2238	1.85173e-258	1.35186e-256	576.133	PGS1
199	ENSG00000120594	0.000557249	7.47613	37.2187	2.12344e-258	1.54243e-256	576.033	PLXDC2
200	ENSG00000145996	-0.000301233	4.87658	-37.1849	5.32692e-258	3.85003e-256	575.191	CDKAL1
201	ENSG00000111913	0.000404731	9.69519	37.1761	6.76774e-258	4.86705e-256	574.975	FAM65B
202	ENSG00000221869	0.000676265	5.55402	37.1622	9.9016e-258	7.08553e-256	574.456	CEBPD
203	ENSG00000132300	-0.00028677	6.18775	-37.1576	1.12127e-257	7.9842e-256	574.339	PTCD3
204	ENSG00000137575	0.000582881	8.91589	37.1508	1.34991e-257	9.56518e-256	574.259	SDCBP
205	ENSG00000106780	0.000646833	7.95961	37.1437	1.63567e-257	1.15335e-255	574.023	MEGF9
206	ENSG00000132953	-0.000301861	5.72147	-37.1387	1.87303e-257	1.3143e-255	573.859	XPO4
207	ENSG00000018280	0.000732203	7.46746	37.1232	2.85881e-257	1.99633e-255	573.453	SLC11A1
208	ENSG00000143119	0.000286891	8.48619	37.0754	1.04562e-256	7.26654e-255	572.162	CD53
209	ENSG00000008294	0.000384978	7.69396	37.0749	1.06216e-256	7.34617e-255	572.116	SPAG9
210	ENSG00000131389	0.000601059	8.25263	37.0713	1.16873e-256	8.04473e-255	572.07	SLC6A6
211	ENSG00000135334	0.000312914	4.37889	37.0475	2.2309e-256	1.52832e-254	571.371	AKIRIN2
212	ENSG00000117151	0.000517438	6.47609	37.0237	4.26407e-256	2.90741e-254	570.693	CTBS
213	ENSG00000228242	0.000649513	4.15859	36.9709	1.78503e-255	1.21139e-253	569.292
214	ENSG00000103047	-0.000258833	5.10697	-36.9663	2.02445e-255	1.36745e-253	569.213	TANGO6
215	ENSG00000059728	0.000702463	9.20494	36.9605	2.36983e-255	1.5933e-253	569.121	MXD1
216	ENSG00000198189	0.000474044	7.37815	36.9497	3.1738e-255	2.12395e-253	568.715	HSD17B11
217	ENSG00000162777	-0.000296893	6.94382	-36.9252	6.16649e-255	4.10768e-253	568.012	DENND2D
218	ENSG00000176225	-0.000349683	5.33613	-36.9042	1.09124e-254	7.23573e-253	567.533	RTTN
219	ENSG00000260916	0.000501702	7.75522	36.8571	3.90323e-254	2.57631e-252	566.226	CCPG1
220	ENSG00000156671	0.00032179	6.15243	36.8503	4.69681e-254	3.08602e-252	565.973	SAMD8
221	ENSG00000138449	0.000565422	7.01128	36.8464	5.22639e-254	3.41844e-252	565.907	SLC40A1
222	ENSG00000287255	0.000769697	1.2945	36.8378	6.59158e-254	4.29195e-252	565.955	NA
223	ENSG00000168615	0.000410985	4.81337	36.8262	9.0174e-254	5.84514e-252	565.34	ADAM9
224	ENSG00000238160	0.000618699	4.41112	36.8258	9.12066e-254	5.88567e-252	565.346
225	ENSG00000130703	0.000410372	6.57506	36.7921	2.27001e-253	1.45836e-251	564.413	OSBPL2
226	ENSG00000115365	-0.000372285	4.96763	-36.7915	2.31114e-253	1.47821e-251	564.532	LANCL1
227	ENSG00000090376	0.00065727	7.34458	36.7902	2.3925e-253	1.52351e-251	564.411	IRAK3
228	ENSG00000170837	0.000639634	3.98105	36.7694	4.19742e-253	2.66113e-251	563.844	GPR27
229	ENSG00000172795	0.000342633	8.27504	36.7656	4.64963e-253	2.93495e-251	563.759	DCP2
230	ENSG00000254470	0.000620535	6.51763	36.7269	1.32426e-252	8.32269e-251	562.668	AP5B1
231	ENSG00000172216	0.000553566	5.82845	36.7148	1.83776e-252	1.14999e-250	562.324	CEBPB
232	ENSG00000067182	0.000540406	6.17097	36.7123	1.96528e-252	1.22449e-250	562.257	TNFRSF1A
233	ENSG00000128594	0.000700049	5.36969	36.6967	2.99843e-252	1.86019e-250	561.837	LRRC4
234	ENSG00000163513	0.000288646	8.46714	36.664	7.25178e-252	4.47968e-250	561.018	TGFBR2
235	ENSG00000104324	0.000477779	6.51719	36.6447	1.22186e-251	7.51572e-250	560.433	CPQ
236	ENSG00000025039	0.000508813	4.7082	36.6394	1.41096e-251	8.64212e-250	560.293	RRAGD
237	ENSG00000168769	0.000492196	8.57378	36.6261	2.02062e-251	1.23241e-249	560.019	TET2
238	ENSG00000285693	0.0004864	3.14292	36.6226	2.21918e-251	1.34783e-249	559.966	NA
239	ENSG00000160712	0.000523348	8.51481	36.5743	8.19391e-251	4.95577e-249	558.621	IL6R
240	ENSG00000134686	0.000758211	6.34098	36.5706	9.05444e-251	5.45341e-249	558.45	PHC2
241	ENSG00000197852	0.000662575	6.62055	36.5641	1.07733e-250	6.46176e-249	558.275	FAM212B
242	ENSG00000140563	0.000530542	7.8871	36.5477	1.67654e-250	1.00142e-248	557.874	MCTP2
243	ENSG00000132334	0.000408254	7.87973	36.5297	2.72762e-250	1.62254e-248	557.376	PTPRE
244	ENSG00000180096	-0.000449234	5.30932	-36.5207	3.47397e-250	2.05804e-248	557.195	2025-09-01
245	ENSG00000062282	0.000750308	6.76762	36.4796	1.05343e-249	6.21525e-248	556.009	DGAT2
246	ENSG00000107738	0.000559028	8.52592	36.4696	1.37855e-249	8.10037e-248	555.805	C10orf54
247	ENSG00000256751	0.000639113	3.38768	36.4576	1.90459e-249	1.11461e-247	555.474	PLBD1-AS1
248	ENSG00000197329	0.00054092	7.50154	36.4278	4.25031e-249	2.47735e-247	554.625	PELI1
249	ENSG00000119979	0.000367656	5.96922	36.4261	4.45066e-249	2.5837e-247	554.519	FAM45A
250	ENSG00000116044	0.000272337	6.48754	36.4238	4.74138e-249	2.74146e-247	554.459	NFE2L2
251	ENSG00000102580	0.000445447	6.80089	36.4104	6.80273e-249	3.91767e-247	554.119	DNAJC3
252	ENSG00000169826	0.000311868	6.12974	36.3623	2.48076e-248	1.42299e-246	552.802	CSGALNACT2
253	ENSG00000145332	0.000392309	5.32432	36.3247	6.83183e-248	3.90332e-246	551.794	KLHL8
254	ENSG00000137393	0.00050201	6.5034	36.3074	1.08802e-247	6.19188e-246	551.344	RNF144B
255	ENSG00000101445	-0.000421825	5.64325	-36.2951	1.51606e-247	8.594e-246	551.078	PPP1R16B
256	ENSG00000039319	0.000434196	7.06822	36.2865	1.90973e-247	1.07833e-245	550.795	ZFYVE16
257	ENSG00000069667	-0.000489207	7.59115	-36.2614	3.74831e-247	2.10824e-245	550.124	RORA
258	ENSG00000144535	-0.000328552	4.66579	-36.2567	4.25801e-247	2.38564e-245	550.132	DIS3L2
259	ENSG00000173559	0.00054215	9.00156	36.2531	4.68763e-247	2.6162e-245	550	NABP1
260	ENSG00000131724	0.000632914	6.88596	36.2434	6.07697e-247	3.37856e-245	549.648	IL13RA1
261	ENSG00000135749	-0.000460014	5.47557	-36.2204	1.12973e-246	6.25678e-245	549.096	PCNX2
262	ENSG00000133961	0.000527018	6.69119	36.2121	1.41065e-246	7.76216e-245	548.791	NUMB
263	ENSG00000089775	-0.000393423	5.73887	-36.212	1.41228e-246	7.76216e-245	548.844	ZBTB25
264	ENSG00000163041	0.000490073	9.52483	36.2061	1.65523e-246	9.063e-245	548.764	H3F3A
265	ENSG00000138378	-0.000445559	6.18346	-36.1882	2.67622e-246	1.4598e-244	548.18	STAT4
266	ENSG00000183023	0.000632696	6.57913	36.1259	1.42676e-245	7.7533e-244	546.484	SLC8A1
267	ENSG00000143622	0.000387595	6.14657	36.1246	1.47585e-245	7.99005e-244	546.42	RIT1
268	ENSG00000111261	0.00078144	4.5927	36.1098	2.19802e-245	1.18554e-243	546.054	MANSC1
269	ENSG00000130684	-0.000335131	4.93483	-36.1088	2.25758e-245	1.21314e-243	546.129	ZNF337
270	ENSG00000033327	0.000643146	6.18426	36.1017	2.72946e-245	1.46127e-243	545.826	GAB2
271	ENSG00000091106	0.000515543	5.63118	36.0723	6.01434e-245	3.20802e-243	545.019	NLRC4
272	ENSG00000059804	0.000637278	8.34901	36.0559	9.34202e-245	4.96466e-243	544.683	SLC2A3
273	ENSG00000135049	0.000374466	7.62876	36.0523	1.02729e-244	5.43938e-243	544.528	AGTPBP1
274	ENSG00000102921	0.000392448	6.51551	36.0479	1.15677e-244	6.10261e-243	544.37	N4BP1
275	ENSG00000068366	0.000453137	7.15619	36.0103	3.17083e-244	1.6667e-242	543.389	ACSL4
276	ENSG00000145491	0.000598911	2.78208	36.0078	3.3869e-244	1.77383e-242	543.457	ROPN1L
277	ENSG00000184014	0.000478508	7.9622	36	4.17514e-244	2.17876e-242	543.152	DENND5A
278	ENSG00000180953	0.000563431	4.19319	35.9365	2.28371e-243	1.18745e-241	541.426	ST20
279	ENSG00000211772	-0.000493392	7.16005	-35.8997	6.11272e-243	3.167e-241	540.425	TRBC2
280	ENSG00000083720	-0.000420639	4.4561	-35.8576	1.88753e-242	9.74438e-241	539.499	OXCT1
281	ENSG00000196352	0.000565665	7.53825	35.8563	1.95103e-242	1.00363e-240	539.298	CD55
282	ENSG00000126883	0.0003404	6.21191	35.8373	3.25025e-242	1.66604e-240	538.726	NUP214
283	ENSG00000197622	0.000270392	9.22391	35.7763	1.65645e-241	8.46075e-240	537.217	CDC42SE1
284	ENSG00000182670	-0.000321696	7.21859	-35.7711	1.90126e-241	9.67702e-240	536.973	TTC3
285	ENSG00000183621	0.000530033	4.67316	35.7669	2.12724e-241	1.07892e-239	536.87	ZNF438
286	ENSG00000136026	0.000569902	5.37064	35.7619	2.43329e-241	1.22983e-239	536.722	CKAP4
287	ENSG00000072952	0.000729866	5.57268	35.7604	2.53201e-241	1.27527e-239	536.691	MRVI1
288	ENSG00000141562	0.000390363	5.22503	35.7601	2.55287e-241	1.28131e-239	536.671	NARF
289	ENSG00000196083	0.000686299	6.76361	35.7547	2.95259e-241	1.47681e-239	536.56	IL1RAP
290	ENSG00000124731	0.000727407	7.42071	35.7421	4.12858e-241	2.05788e-239	536.256	TREM1
291	ENSG00000101084	0.000396366	5.92159	35.702	1.20407e-240	5.98105e-239	535.115	C20orf24
292	ENSG00000135976	-0.000443408	6.88846	-35.6941	1.48438e-240	7.34819e-239	534.936	ANKRD36
293	ENSG00000169299	0.000356674	5.91668	35.692	1.57214e-240	7.75605e-239	534.846	PGM2
294	ENSG00000089737	-0.000268595	6.78717	-35.6791	2.21618e-240	1.08962e-238	534.512	DDX24
295	ENSG00000143815	0.000436987	8.00954	35.666	3.14492e-240	1.54101e-238	534.227	LBR
296	ENSG00000215114	0.000532649	6.44519	35.6606	3.6323e-240	1.77381e-238	534.029	UBXN2B
297	ENSG00000073921	0.000399533	9.09233	35.6497	4.85676e-240	2.36379e-238	533.845	PICALM
298	ENSG00000006530	-0.00034268	4.88222	-35.6319	7.81432e-240	3.79047e-238	533.391	AGK
299	ENSG00000121406	-0.000377277	4.14654	-35.6317	7.8534e-240	3.79669e-238	533.506	ZNF549
300	ENSG00000088387	-0.000436649	6.03456	-35.6265	9.01498e-240	4.34372e-238	533.167	DOCK9
301	ENSG00000117020	-0.000406368	5.97247	-35.6221	1.01368e-239	4.86801e-238	533.049	AKT3
302	ENSG00000203710	0.000755292	8.0261	35.6216	1.02611e-239	4.91142e-238	533.078	CR1
303	ENSG00000086730	0.000479466	6.78094	35.6211	1.04008e-239	4.96186e-238	532.987	LAT2
304	ENSG00000239998	0.000593647	6.10924	35.6023	1.71993e-239	8.17815e-238	532.475	LILRA2
305	ENSG00000108582	0.000608927	8.14377	35.5791	3.18893e-239	1.51135e-237	531.935	CPD
306	ENSG00000246263	0.000518318	4.44257	35.5769	3.38117e-239	1.59722e-237	531.816	UBR5-AS1
307	ENSG00000156052	0.000461908	7.31226	35.5708	3.97752e-239	1.8728e-237	531.661	GNAQ
308	ENSG00000113532	0.000428957	7.83397	35.5699	4.07035e-239	1.91029e-237	531.659	ST8SIA4
309	ENSG00000163625	0.000720024	8.06879	35.5657	4.5523e-239	2.12956e-237	531.586	WDFY3
310	ENSG00000100030	0.000352204	8.70662	35.5614	5.10414e-239	2.38001e-237	531.469	MAPK1
311	ENSG00000172197	0.000319046	5.35761	35.5291	1.20768e-238	5.61318e-237	530.509	MBOAT1
312	ENSG00000133706	-0.000256009	6.57067	-35.5239	1.38414e-238	6.41272e-237	530.385	LARS
313	ENSG00000109220	0.000315446	4.68051	35.4732	5.33965e-238	2.46596e-236	529.05	CHIC2
314	ENSG00000151893	0.000360303	7.13746	35.4523	9.3213e-238	4.29106e-236	528.493	CACUL1
315	ENSG00000145860	0.000250733	6.62592	35.4444	1.14836e-237	5.26968e-236	528.261	RNF145
316	ENSG00000139370	0.000426792	6.74528	35.4344	1.49924e-237	6.8581e-236	528.011	SLC15A4
317	ENSG00000138411	0.000683782	3.47324	35.4301	1.67789e-237	7.65107e-236	527.973	HECW2
318	ENSG00000100938	0.000296062	5.8952	35.4197	2.21327e-237	1.00606e-235	527.597	GMPR2
319	ENSG00000248323	0.000661218	7.60327	35.4029	3.46294e-237	1.56918e-235	527.228	LUCAT1
320	ENSG00000170836	0.000263572	4.41841	35.3987	3.87175e-237	1.74894e-235	527.098	PPM1D
321	ENSG00000154473	-0.000251685	6.18597	-35.3916	4.66788e-237	2.102e-235	526.88	BUB3
322	ENSG00000171051	0.00072618	9.13483	35.3886	5.05376e-237	2.2687e-235	526.939	FPR1
323	ENSG00000197442	0.000342699	7.33125	35.3856	5.47907e-237	2.45201e-235	526.73	MAP3K5
324	ENSG00000162702	0.000420008	6.37528	35.3788	6.56885e-237	2.93064e-235	526.523	ZNF281
325	ENSG00000198814	0.000602639	6.72341	35.3777	6.76022e-237	3.00674e-235	526.518	GK
326	ENSG00000143515	-0.000384623	6.74335	-35.3302	2.38873e-236	1.05917e-234	525.247	ATP8B2
327	ENSG00000147416	0.000471296	8.63613	35.3248	2.7569e-236	1.21869e-234	525.19	ATP6V1B2
328	ENSG00000160588	0.000547552	6.80084	35.3202	3.11232e-236	1.3716e-234	524.99	MPZL3
329	ENSG00000174501	-0.000428738	6.69269	-35.2991	5.44928e-236	2.3942e-234	524.434	ANKRD36C
330	ENSG00000127954	0.000727139	8.60057	35.2586	1.59527e-235	6.98779e-234	523.457	STEAP4
331	ENSG00000173110	0.000666564	6.87444	35.2475	2.14067e-235	9.34843e-234	523.08	HSPA6
332	ENSG00000107341	0.000439454	5.73555	35.242	2.47805e-235	1.07892e-233	522.887	UBE2R2
333	ENSG00000204054	0.000474246	5.23871	35.241	2.53996e-235	1.10256e-233	522.868	LINC00963
334	ENSG00000168214	0.00039699	7.10486	35.1974	8.07424e-235	3.4944e-233	521.734	RBPJ
335	ENSG00000169967	0.000390747	8.35693	35.1937	8.91111e-235	3.84508e-233	521.692	MAP3K2
336	ENSG00000018699	-0.000370726	3.96367	-35.1792	1.30841e-234	5.6289e-233	521.521	TTC27
337	ENSG00000204160	0.00058767	7.23684	35.1497	2.85919e-234	1.2264e-232	520.495	ZDHHC18
338	ENSG00000073849	-0.000329403	6.82727	-35.1458	3.16216e-234	1.35234e-232	520.356	ST6GAL1
339	ENSG00000100296	0.00036129	5.45334	35.1272	5.186e-234	2.21132e-232	519.847	THOC5
340	ENSG00000101493	0.000550234	6.54875	35.1244	5.5831e-234	2.37364e-232	519.798	ZNF516
341	ENSG00000120696	0.000474721	5.39497	35.1227	5.84129e-234	2.47613e-232	519.731	KBTBD7
342	ENSG00000177272	-0.000435141	5.05779	-35.1153	7.10627e-234	3.00354e-232	519.681	KCNA3
343	ENSG00000118508	0.000449258	4.64326	35.1123	7.6904e-234	3.24095e-232	519.477	RAB32
344	ENSG00000188559	0.000464357	7.25294	35.1032	9.78152e-234	4.11023e-232	519.254	RALGAPA2
345	ENSG00000173535	0.000696201	8.39578	35.0964	1.16876e-233	4.89694e-232	519.153	TNFRSF10C
346	ENSG00000166579	0.000436307	6.95026	35.0812	1.74753e-233	7.30073e-232	518.66	NDEL1
347	ENSG00000119471	0.000481985	5.66888	35.0637	2.77815e-233	1.1573e-231	518.173	HSDL2
348	ENSG00000182866	-0.000445386	6.85243	-35.0611	2.97852e-233	1.2372e-231	518.128	LCK
349	ENSG00000140749	0.000534763	7.9369	35.0461	4.42633e-233	1.83331e-231	517.783	IGSF6
350	ENSG00000135414	-0.000491227	3.5081	-35.0451	4.54954e-233	1.87896e-231	518.09	GDF11
351	ENSG00000087253	0.000546194	6.79518	35.0325	6.34146e-233	2.61156e-231	517.375	LPCAT2
352	ENSG00000136371	0.000433283	4.34244	35.0252	7.68527e-233	3.15598e-231	517.194	MTHFS
353	ENSG00000171940	0.000298408	8.19506	34.9994	1.52008e-232	6.2246e-231	516.539	ZNF217
354	ENSG00000198700	-0.000257675	5.51616	-34.9992	1.52887e-232	6.2429e-231	516.525	IPO9
355	ENSG00000138678	0.00058698	5.40228	34.9661	3.66708e-232	1.49317e-230	515.6	GPAT3
356	ENSG00000134324	-0.00031732	5.74915	-34.9489	5.76594e-232	2.3412e-230	515.194	LPIN1
357	ENSG00000111058	0.000708154	4.8855	34.9069	1.74614e-231	7.07016e-230	514.054	ACSS3
358	ENSG00000171049	0.00073974	7.60162	34.9025	1.96248e-231	7.92394e-230	513.995	FPR2
359	ENSG00000056558	-0.000464338	5.29169	-34.8939	2.46592e-231	9.92892e-230	513.815	TRAF1
360	ENSG00000170892	0.00054604	5.6629	34.8919	2.59817e-231	1.04324e-229	513.646	TSEN34
361	ENSG00000187554	0.000683399	4.97806	34.8792	3.62505e-231	1.45153e-229	513.32	TLR5
362	ENSG00000178105	-0.000331356	4.49819	-34.8671	4.99537e-231	1.9947e-229	513.179	DDX10
363	ENSG00000101019	-0.000304262	4.45926	-34.8624	5.64603e-231	2.2483e-229	513.052	UQCC1
364	ENSG00000147316	-0.000286903	5.17276	-34.861	5.8695e-231	2.33087e-229	512.921	MCPH1
365	ENSG00000146828	0.00047148	6.24301	34.8552	6.84121e-231	2.70931e-229	512.681	SLC12A9
366	ENSG00000185862	0.000460727	7.65854	34.8506	7.70704e-231	3.04386e-229	512.605	EVI2B
367	ENSG00000135775	-0.000224021	4.99586	-34.8498	7.88028e-231	3.10342e-229	512.626	COG2
368	ENSG00000198053	0.000628689	6.43653	34.8497	7.90079e-231	3.10342e-229	512.55	SIRPA
369	ENSG00000107566	0.000372626	4.39241	34.8229	1.60012e-230	6.26822e-229	511.858	ERLIN1
370	ENSG00000125485	-0.000402285	3.41265	-34.8122	2.12305e-230	8.29423e-229	511.949	DDX31
371	ENSG00000137177	0.000544242	6.51074	34.7976	3.11759e-230	1.21468e-228	511.172	KIF13A
372	ENSG00000070061	-0.000245455	6.13221	-34.7916	3.64858e-230	1.41775e-228	511.016	IKBKAP
373	ENSG00000117174	-0.000405112	3.96372	-34.7772	5.33372e-230	2.067e-228	510.923	ZNHIT6
374	ENSG00000224078	-0.000425168	7.30373	-34.7766	5.42398e-230	2.09635e-228	510.623	SNHG14
375	ENSG00000166439	0.000263078	7.44743	34.7387	1.4682e-229	5.65942e-228	509.633	RNF169
376	ENSG00000171236	0.000794301	5.68833	34.7058	3.49086e-229	1.34203e-227	508.765	LRG1
377	ENSG00000165115	0.000590449	4.94904	34.7026	3.80472e-229	1.45881e-227	508.666	KIF27
378	ENSG00000142166	0.000393869	7.15527	34.6791	7.058e-229	2.69903e-227	508.062	IFNAR1
379	ENSG00000100365	0.000632717	6.5043	34.6729	8.29548e-229	3.16388e-227	507.904	NCF4
380	ENSG00000144802	0.00032672	6.7495	34.6703	8.88815e-229	3.38101e-227	507.814	NFKBIZ
381	ENSG00000163947	-0.00026412	6.36242	-34.6621	1.10271e-228	4.18365e-227	507.602	ARHGEF3
382	ENSG00000151694	0.0003019	5.98566	34.6551	1.32453e-228	5.01205e-227	507.399	ADAM17
383	ENSG00000136630	0.000576107	3.95186	34.6491	1.55321e-228	5.86203e-227	507.311	HLX
384	ENSG00000106070	0.000703447	2.74173	34.6471	1.63527e-228	6.15569e-227	507.362	GRB10
385	ENSG00000204577	0.000664278	6.23261	34.645	1.72845e-228	6.48955e-227	507.164	LILRB3
386	ENSG00000146094	0.000634259	5.32828	34.6273	2.75305e-228	1.03097e-226	506.696	DOK3
387	ENSG00000164938	0.00041365	7.38188	34.6163	3.66872e-228	1.37032e-226	506.426	TP53INP1
388	ENSG00000170525	0.00064009	5.49239	34.6124	4.06507e-228	1.51445e-226	506.297	PFKFB3
389	ENSG00000163681	0.000231175	6.32431	34.5952	6.3979e-228	2.37742e-226	505.826	SLMAP
390	ENSG00000086848	-0.000313949	3.67295	-34.5942	6.55726e-228	2.43039e-226	506.138	ALG9
391	ENSG00000140199	0.000486837	8.02249	34.5913	7.07279e-228	2.61476e-226	505.807	SLC12A6
392	ENSG00000051825	-0.000305385	5.44052	-34.5691	1.26876e-227	4.67855e-226	505.226	MPHOSPH9
393	ENSG00000065135	0.000288675	7.35305	34.5455	2.35957e-227	8.67876e-226	504.554	GNAI3
394	ENSG00000159267	-0.000426914	3.91342	-34.5392	2.77885e-227	1.0195e-225	504.675	HLCS
395	ENSG00000146414	-0.000280571	6.54969	-34.5308	3.46576e-227	1.26322e-225	504.158	SHPRH
396	ENSG00000113368	0.000533862	5.6492	34.5308	3.46721e-227	1.26322e-225	504.146	LMNB1
397	ENSG00000142046	0.000515737	4.10751	34.5308	3.46938e-227	1.26322e-225	504.197	TMEM91
398	ENSG00000182541	0.000654779	7.07205	34.5287	3.65752e-227	1.32838e-225	504.138	LIMK2
399	ENSG00000042088	-0.000297039	4.53198	-34.5261	3.91822e-227	1.4195e-225	504.201	TDP1
400	ENSG00000113742	0.00047459	6.9795	34.513	5.52626e-227	1.99705e-225	503.705	CPEB4
401	ENSG00000135932	0.000323963	7.59636	34.5065	6.55636e-227	2.3634e-225	503.546	CAB39
402	ENSG00000125304	0.000311322	6.62011	34.4982	8.13909e-227	2.92663e-225	503.295	TM9SF2
403	ENSG00000213347	0.000564541	4.45256	34.4891	1.03367e-226	3.70762e-225	503.088	MXD3
404	ENSG00000197872	0.000394282	6.92667	34.4711	1.65782e-226	5.93163e-225	502.6	FAM49A
405	ENSG00000145907	-0.000207497	7.29115	-34.4478	3.05117e-226	1.089e-224	501.973	G3BP1
406	ENSG00000111647	0.000384211	6.51668	34.4447	3.31068e-226	1.17872e-224	501.895	UHRF1BP1L
407	ENSG00000163297	0.000347657	7.35954	34.4402	3.72829e-226	1.32414e-224	501.801	ANTXR2
408	ENSG00000198736	0.000658894	6.81741	34.4354	4.22693e-226	1.49756e-224	501.687	MSRB1
409	ENSG00000087074	0.000468035	5.44317	34.4334	4.45986e-226	1.57622e-224	501.595	PPP1R15A
410	ENSG00000213390	0.000342156	5.70175	34.3978	1.13267e-225	3.99334e-224	500.652	ARHGAP19
411	ENSG00000163644	-0.000379348	6.17866	-34.396	1.18481e-225	4.16703e-224	500.66	PPM1K
412	ENSG00000126226	-0.000298367	5.06398	-34.3906	1.36651e-225	4.79438e-224	500.58	PCID2
413	ENSG00000166912	0.000370439	6.83827	34.3869	1.50608e-225	5.27126e-224	500.388	MTMR10
414	ENSG00000160654	-0.000534681	5.1333	-34.3793	1.83719e-225	6.41462e-224	500.34	CD3G
415	ENSG00000088833	0.000387076	5.87443	34.3781	1.89492e-225	6.60027e-224	500.141	NSFL1C
416	ENSG00000113649	-0.000275514	5.52506	-34.3306	6.57305e-225	2.28398e-223	498.966	TCERG1
417	ENSG00000135828	0.000312926	6.34103	34.3241	7.78103e-225	2.69724e-223	498.731	RNASEL
418	ENSG00000214456	0.000639949	2.73924	34.3119	1.07245e-224	3.70867e-223	498.582	PLIN5
419	ENSG00000156026	0.000282855	4.19003	34.307	1.21625e-224	4.19593e-223	498.354	MCU
420	ENSG00000170345	0.000651605	5.77984	34.2981	1.53715e-224	5.29035e-223	498.066	FOS
421	ENSG00000125827	0.000390462	7.49104	34.2961	1.61775e-224	5.55455e-223	498.043	TMX4
422	ENSG00000022277	0.00034924	6.74942	34.2769	2.67755e-224	9.17156e-223	497.509	RTFDC1
423	ENSG00000117335	0.000391169	8.85572	34.2652	3.6268e-224	1.23937e-222	497.302	CD46
424	ENSG00000170852	0.000256865	6.76783	34.2579	4.39126e-224	1.49707e-222	497.008	KBTBD2
425	ENSG00000151702	0.000214163	7.45235	34.2573	4.46173e-224	1.51751e-222	497.012	FLI1
426	ENSG00000167434	0.000735039	2.77451	34.2293	9.26847e-224	3.14497e-222	496.413	CA4
427	ENSG00000286076	0.000661974	1.83802	34.2048	1.75899e-223	5.95462e-222	495.887	NA
428	ENSG00000198604	0.00038885	7.56416	34.2044	1.77739e-223	6.00283e-222	495.65	BAZ1A
429	ENSG00000057704	0.000596546	6.44122	34.2002	1.98533e-223	6.68949e-222	495.516	TMCC3
430	ENSG00000112195	0.000563085	5.84133	34.1994	2.0244e-223	6.80529e-222	495.484	TREML2
431	ENSG00000117090	-0.000489036	4.32534	-34.1883	2.70833e-223	9.08328e-222	495.453	SLAMF1
432	ENSG00000117410	0.000467861	6.76053	34.1813	3.24646e-223	1.08629e-221	495.028	ATP6V0B
433	ENSG00000011295	-0.000307934	4.5601	-34.1744	3.88539e-223	1.29707e-221	495.003	TTC19
434	ENSG00000082996	0.000426006	7.05386	34.1737	3.95505e-223	1.31729e-221	494.833	RNF13
435	ENSG00000168795	-0.000323672	3.80046	-34.1725	4.08291e-223	1.35675e-221	495.084	ZBTB5
436	ENSG00000131089	-0.000361659	4.18875	-34.1718	4.15631e-223	1.37797e-221	495.004	ARHGEF9
437	ENSG00000181826	0.000515272	5.4627	34.1661	4.82364e-223	1.59555e-221	494.61	RELL1
438	ENSG00000027697	0.000496233	7.59323	34.1638	5.12296e-223	1.69069e-221	494.605	IFNGR1
439	ENSG00000107077	-0.000230729	6.66172	-34.1626	5.29438e-223	1.74329e-221	494.518	KDM4C
440	ENSG00000170006	0.000517601	9.17813	34.1544	6.54457e-223	2.15004e-221	494.441	TMEM154
441	ENSG00000232931	-0.000435513	5.58002	-34.1532	6.76082e-223	2.21605e-221	494.364	LINC00342
442	ENSG00000112242	0.000436937	4.88488	34.1474	7.86011e-223	2.57054e-221	494.132	E2F3
443	ENSG00000130150	0.000464065	6.13221	34.1473	7.88004e-223	2.57124e-221	494.122	MOSPD2
444	ENSG00000101558	0.000309698	7.06538	34.14	9.53415e-223	3.10397e-221	493.944	VAPA
445	ENSG00000158201	0.000372311	6.12935	34.1199	1.61069e-222	5.23204e-221	493.401	ABHD3
446	ENSG00000010810	-0.000269506	7.22772	-34.1029	2.50731e-222	8.12626e-221	492.965	FYN
447	ENSG00000257335	0.000928608	7.85377	34.081	4.43593e-222	1.43448e-220	492.499	MGAM
448	ENSG00000170832	0.000463025	8.17953	34.0567	8.36297e-222	2.69836e-220	491.838	USP32
449	ENSG00000117597	-0.000332118	4.81888	-34.0531	9.19737e-222	2.96098e-220	491.813	DIEXF
450	ENSG00000188906	0.000605166	10.2887	34.0374	1.38321e-221	4.44319e-220	491.468	LRRK2
451	ENSG00000144228	0.000439914	7.16778	34.0364	1.41848e-221	4.54636e-220	491.261	SPOPL
452	ENSG00000092531	0.000367924	7.19358	34.036	1.43342e-221	4.58408e-220	491.246	SNAP23
453	ENSG00000182831	0.000355178	8.80544	34.0292	1.71259e-221	5.46479e-220	491.142	C16orf72
454	ENSG00000162413	0.000432599	5.99393	34.0253	1.89572e-221	6.03582e-220	490.942	KLHL21
455	ENSG00000286065	-0.000486938	5.39928	-34.0165	2.38425e-221	7.57459e-220	490.828	NA
456	ENSG00000002919	0.000363853	4.73827	34.0115	2.71175e-221	8.59613e-220	490.599	SNX11
457	ENSG00000013725	-0.000524428	5.19928	-34.0081	2.96349e-221	9.37358e-220	490.645	CD6
458	ENSG00000173757	0.00040046	7.79868	33.9887	4.91115e-221	1.55001e-219	490.045	STAT5B
459	ENSG00000001461	-0.00031067	5.6944	-33.9846	5.46938e-221	1.72244e-219	489.935	NIPAL3
460	ENSG00000093134	0.00071177	6.41452	33.9689	8.21844e-221	2.58255e-219	489.502	VNN3
461	ENSG00000109586	0.0002771	5.41727	33.9437	1.58436e-220	4.96787e-219	488.816	GALNT7
462	ENSG00000100368	0.000603587	8.14653	33.9341	2.03255e-220	6.35942e-219	488.661	CSF2RB
463	ENSG00000119682	0.000314559	6.92059	33.9193	2.98761e-220	9.3274e-219	488.197	AREL1
464	ENSG00000112303	0.000747944	9.18995	33.9051	4.32358e-220	1.34693e-218	487.978	VNN2
465	ENSG00000128383	0.000651189	6.89988	33.9002	4.89978e-220	1.52315e-218	487.731	APOBEC3A
466	ENSG00000085063	0.000404686	6.16385	33.8807	8.13439e-220	2.52323e-218	487.182	CD59
467	ENSG00000157540	0.000204537	8.03823	33.8566	1.52368e-219	4.71623e-218	486.603	DYRK1A
468	ENSG00000087206	0.000310336	5.77289	33.8546	1.60483e-219	4.95679e-218	486.496	UIMC1
469	ENSG00000235750	0.000367285	7.25416	33.8383	2.44813e-219	7.54535e-218	486.111	KIAA0040
470	ENSG00000177663	0.000554829	7.58477	33.8321	2.87901e-219	8.8545e-218	485.981	IL17RA
471	ENSG00000103994	0.00036198	8.28154	33.8252	3.43488e-219	1.05417e-217	485.819	ZNF106
472	ENSG00000111300	-0.000287302	4.98833	-33.8251	3.44789e-219	1.05592e-217	485.859	NAA25
473	ENSG00000268170	0.000762114	2.12852	33.8194	3.99312e-219	1.22031e-217	485.817
474	ENSG00000100266	0.000509846	7.01783	33.8192	4.02034e-219	1.22603e-217	485.619	PACSIN2
475	ENSG00000012232	0.00048026	5.93983	33.8162	4.3489e-219	1.32344e-217	485.51	EXTL3
476	ENSG00000076513	0.000348615	7.95993	33.8153	4.44381e-219	1.34948e-217	485.545	ANKRD13A
477	ENSG00000140350	0.000256233	7.0586	33.8134	4.66959e-219	1.41507e-217	485.45	ANP32A
478	ENSG00000134996	0.00034058	6.92137	33.8081	5.35683e-219	1.61994e-217	485.314	OSTF1
479	ENSG00000145868	0.00026127	6.85648	33.8064	5.60186e-219	1.6905e-217	485.261	FBXO38
480	ENSG00000163464	0.000729971	8.58382	33.8027	6.17155e-219	1.85854e-217	485.286	CXCR1
481	ENSG00000169891	0.000745088	5.84798	33.7896	8.67185e-219	2.60606e-217	484.836	REPS2
482	ENSG00000132357	0.000392954	4.04093	33.7753	1.25568e-218	3.76574e-217	484.512	CARD6
483	ENSG00000139946	0.000473538	6.4611	33.7728	1.33802e-218	4.00437e-217	484.395	PELI2
484	ENSG00000284948	0.000606343	3.98871	33.7303	4.03375e-218	1.20471e-216	483.348	NA
485	ENSG00000157800	0.000500856	5.07941	33.718	5.54214e-218	1.65179e-216	482.969	SLC37A3
486	ENSG00000267365	0.000566821	1.88221	33.7142	6.11401e-218	1.81848e-216	483.162	KCNJ2-AS1
487	ENSG00000181631	0.000555646	6.00777	33.7138	6.17958e-218	1.83421e-216	482.864	P2RY13
488	ENSG00000105866	-0.00027259	5.89255	-33.7019	8.41407e-218	2.49232e-216	482.586	SP4
489	ENSG00000120868	0.000423776	7.34916	33.6853	1.29275e-217	3.8214e-216	482.156	APAF1
490	ENSG00000135655	0.000412715	9.03919	33.6821	1.40494e-217	4.14458e-216	482.154	USP15
491	ENSG00000165929	-0.000456851	7.17702	-33.6626	2.32518e-217	6.84532e-216	481.56	TC2N
492	ENSG00000198393	-0.00031535	5.01943	-33.6424	3.92539e-217	1.15328e-215	481.128	ZNF26
493	ENSG00000135838	0.000550033	6.28261	33.623	6.48993e-217	1.90288e-215	480.517	NPL
494	ENSG00000168297	0.000351813	5.13892	33.6178	7.42112e-217	2.1715e-215	480.374	PXK
495	ENSG00000068383	0.000343428	4.57261	33.6079	9.57924e-217	2.79733e-215	480.144	INPP5A
496	ENSG00000065559	0.000346382	6.19334	33.5932	1.40136e-216	4.08401e-215	479.733	MAP2K4
497	ENSG00000180353	0.000340086	8.78904	33.5913	1.47417e-216	4.28755e-215	479.786	HCLS1
498	ENSG00000247774	-0.000416441	5.44563	-33.5901	1.51914e-216	4.40947e-215	479.756	PCED1B-AS1
499	ENSG00000132965	0.000614145	6.97284	33.5731	2.35867e-216	6.83258e-215	479.256	ALOX5AP
500	ENSG00000198909	0.000393124	6.39481	33.5228	8.64149e-216	2.49825e-214	477.924	MAP3K3
501	ENSG00000182885	0.000804799	5.5197	33.5206	9.15373e-216	2.64106e-214	477.884	ADGRG3
502	ENSG00000102010	0.000780156	2.54427	33.5174	9.93089e-216	2.85958e-214	477.948	BMX
503	ENSG00000164713	0.000413322	4.95112	33.5081	1.2643e-215	3.6333e-214	477.547	BRI3
504	ENSG00000106829	0.00030137	6.71625	33.5061	1.33152e-215	3.81886e-214	477.491	TLE4
505	ENSG00000141480	0.000423086	7.43455	33.4962	1.71993e-215	4.9231e-214	477.273	ARRB2
506	ENSG00000165733	-0.00030389	5.21661	-33.4945	1.79348e-215	5.12346e-214	477.284	BMS1
507	ENSG00000138772	0.000913851	4.81953	33.4886	2.08883e-215	5.95543e-214	477.068	ANXA3
508	ENSG00000255112	0.000340115	6.74066	33.4853	2.27785e-215	6.48157e-214	476.958	CHMP1B
509	ENSG00000138069	0.000268146	5.77967	33.4614	4.22395e-215	1.19955e-213	476.324	RAB1A
510	ENSG00000161533	0.000525066	7.33694	33.4481	5.94762e-215	1.68574e-213	476.037	ACOX1
511	ENSG00000185104	-0.0002026	5.17052	-33.4405	7.23177e-215	2.0457e-213	475.869	FAF1
512	ENSG00000112685	-0.000257623	5.91806	-33.4332	8.72978e-215	2.46463e-213	475.638	EXOC2
513	ENSG00000069275	-0.0002921	6.62849	-33.4259	1.05408e-214	2.96709e-213	475.434	NUCKS1
514	ENSG00000139112	0.000418704	5.91234	33.4259	1.05506e-214	2.96709e-213	475.414	GABARAPL1
515	ENSG00000100461	0.000327693	6.8134	33.4234	1.12567e-214	3.15954e-213	475.363	RBM23
516	ENSG00000135622	-0.000498744	2.8364	-33.4179	1.29529e-214	3.62856e-213	475.767	SEMA4F
517	ENSG00000196329	-0.000370962	7.60132	-33.4023	1.93743e-214	5.41693e-213	474.821	GIMAP5
518	ENSG00000237441	0.000379113	5.71118	33.393	2.46495e-214	6.87853e-213	474.567	RGL2
519	ENSG00000015171	-0.000323958	5.31506	-33.369	4.57073e-214	1.27302e-212	474.046	ZMYND11
520	ENSG00000169905	0.000207865	6.63966	33.3279	1.31578e-213	3.65762e-212	472.893	TOR1AIP2
521	ENSG00000116741	0.000658233	8.74285	33.3203	1.60303e-213	4.44756e-212	472.828	RGS2
522	ENSG00000172243	0.000473862	7.81695	33.3023	2.54802e-213	7.05587e-212	472.299	CLEC7A
523	ENSG00000038219	0.000362413	8.80717	33.3008	2.64448e-213	7.30898e-212	472.3	BOD1L1
524	ENSG00000059573	-0.000405316	3.77364	-33.2872	3.75059e-213	1.03463e-211	472.189	ALDH18A1
525	ENSG00000169991	-0.000411531	4.74916	-33.2845	4.02543e-213	1.10834e-211	471.954	IFFO2
526	ENSG00000142657	0.000554374	7.45867	33.2797	4.55046e-213	1.25051e-211	471.712	PGD
527	ENSG00000101474	0.000509998	7.11963	33.2794	4.58672e-213	1.25808e-211	471.685	APMAP
528	ENSG00000171824	-0.000232109	5.30113	-33.2751	5.13232e-213	1.40507e-211	471.603	EXOSC10
529	ENSG00000162704	0.000374108	8.41183	33.266	6.47132e-213	1.7683e-211	471.386	ARPC5
530	ENSG00000113161	0.000325786	6.24515	33.2641	6.80105e-213	1.85489e-211	471.25	HMGCR
531	ENSG00000165650	0.0004149	6.72111	33.2624	7.1021e-213	1.93335e-211	471.224	PDZD8
532	ENSG00000163257	-0.00024628	5.41447	-33.2522	9.24629e-213	2.51231e-211	471.014	DCAF16
533	ENSG00000165801	0.000643215	5.65079	33.2368	1.37411e-212	3.7266e-211	470.563	ARHGEF40
534	ENSG00000172673	-0.000553749	6.09583	-33.2318	1.56144e-212	4.22669e-211	470.504	THEMIS
535	ENSG00000075420	0.000452457	7.22027	33.2287	1.69049e-212	4.56748e-211	470.379	FNDC3B
536	ENSG00000184677	-0.000295673	6.00003	-33.2081	2.87368e-212	7.74983e-211	469.845	ZBTB40
537	ENSG00000092036	0.00052738	5.25494	33.2055	3.06816e-212	8.2589e-211	469.753	HAUS4
538	ENSG00000120709	0.000545923	5.65832	33.2045	3.14642e-212	8.45382e-211	469.726	FAM53C
539	ENSG00000084070	0.000611578	7.18125	33.1938	4.14089e-212	1.11051e-210	469.497	SMAP2
540	ENSG00000174373	-0.00027268	6.50972	-33.1932	4.20877e-212	1.12662e-210	469.447	RALGAPA1
541	ENSG00000132475	0.000426965	9.25806	33.1801	5.89631e-212	1.57544e-210	469.23	H3F3B
542	ENSG00000119669	0.00048856	4.55661	33.1752	6.68455e-212	1.78275e-210	469.004	IRF2BPL
543	ENSG00000156273	0.000437083	8.72272	33.1706	7.5245e-212	2.00307e-210	468.956	BACH1
544	ENSG00000108506	-0.000288172	4.38579	-33.1559	1.09623e-211	2.91288e-210	468.673	INTS2
545	ENSG00000033800	0.000266357	7.33132	33.1535	1.16725e-211	3.0959e-210	468.436	PIAS1
546	ENSG00000103313	0.000572238	7.47468	33.1428	1.53708e-211	4.06932e-210	468.196	MEFV
547	ENSG00000131236	0.00034164	8.80739	33.1391	1.69014e-211	4.46635e-210	468.144	CAP1
548	ENSG00000169403	0.000567857	8.09919	33.1239	2.49637e-211	6.58485e-210	467.74	PTAFR
549	ENSG00000144741	-0.000350401	3.56881	-33.1201	2.75159e-211	7.24484e-210	467.915	SLC25A26
550	ENSG00000113749	0.000689406	5.8792	33.0945	5.30063e-211	1.3931e-209	466.917	HRH2
551	ENSG00000138463	0.000411842	4.81228	33.0941	5.36587e-211	1.40769e-209	466.902	DIRC2
552	ENSG00000137312	0.000485761	6.20862	33.0872	6.39592e-211	1.67487e-209	466.721	FLOT1
553	ENSG00000102144	0.000279372	8.43037	33.0638	1.16588e-210	3.04752e-209	466.189	PGK1
554	ENSG00000073331	0.000614092	7.24115	33.0586	1.3324e-210	3.47651e-209	466.03	ALPK1
555	ENSG00000164466	-0.000313072	4.94619	-33.058	1.35151e-210	3.52001e-209	466.096	SFXN1
556	ENSG00000064763	0.000489767	5.18655	33.0525	1.55829e-210	4.05127e-209	465.826	FAR2
557	ENSG00000146909	-0.000268115	4.34678	-33.0471	1.78673e-210	4.63685e-209	465.884	NOM1
558	ENSG00000118518	0.000274844	5.7027	33.0356	2.40067e-210	6.21894e-209	465.383	RNF146
559	ENSG00000110446	0.000417983	5.41068	33.0275	2.95505e-210	7.64138e-209	465.185	SLC15A3
560	ENSG00000112531	0.000388478	7.90624	33.025	3.15163e-210	8.13514e-209	465.178	QKI
561	ENSG00000131378	-0.00029808	5.14794	-33.0208	3.50722e-210	9.03687e-209	465.111	RFTN1
562	ENSG00000136925	-0.000251677	4.07835	-33.0206	3.52459e-210	9.06546e-209	465.245	TSTD2
563	ENSG00000145041	-0.000273786	5.09375	-33.0035	5.46527e-210	1.40321e-208	464.668	DCAF1
564	ENSG00000170876	0.000341894	6.73746	32.9885	8.02216e-210	2.05603e-208	464.195	TMEM43
565	ENSG00000012660	0.000328387	7.53493	32.9871	8.32595e-210	2.13012e-208	464.185	ELOVL5
566	ENSG00000198286	-0.000438691	5.22911	-32.9732	1.18621e-209	3.02943e-208	463.92	CARD11
567	ENSG00000215301	0.000276375	9.29173	32.966	1.42723e-209	3.63856e-208	463.727	DDX3X
568	ENSG00000164506	0.000359227	7.30107	32.9602	1.65412e-209	4.20955e-208	463.492	STXBP5
569	ENSG00000145191	-0.000217946	5.25928	-32.9412	2.69569e-209	6.84818e-208	463.042	EIF2B5
570	ENSG00000254087	0.00053263	8.4632	32.9365	3.03939e-209	7.70778e-208	462.955	LYN
571	ENSG00000123329	0.000433523	6.68086	32.923	4.28622e-209	1.08507e-207	462.527	ARHGAP9
572	ENSG00000197249	0.000615065	7.11047	32.903	7.15447e-209	1.808e-207	462.045	SERPINA1
573	ENSG00000176788	0.000778145	6.78909	32.8795	1.30489e-208	3.29182e-207	461.444	BASP1
574	ENSG00000168827	-0.000233271	5.29494	-32.8311	4.49683e-208	1.13243e-206	460.235	GFM1
575	ENSG00000009790	-0.000213178	7.29864	-32.8119	7.33673e-208	1.84439e-206	459.674	TRAF3IP3
576	ENSG00000129351	-0.000224189	6.83585	-32.8059	8.54123e-208	2.14346e-206	459.519	ILF3
577	ENSG00000059588	-0.000351719	5.17	-32.8053	8.67826e-208	2.17408e-206	459.619	TARBP1
578	ENSG00000160746	0.000340177	3.82771	32.8023	9.36572e-208	2.34224e-206	459.523	ANO10
579	ENSG00000125354	-0.000297212	6.25407	-32.7874	1.36907e-207	3.41795e-206	459.073	2025-09-06
580	ENSG00000171310	0.000379872	7.26313	32.7864	1.40716e-207	3.50699e-206	459.053	CHST11
581	ENSG00000276649	0.000526123	2.55233	32.78	1.65642e-207	4.12109e-206	459.07
582	ENSG00000134982	0.00029641	7.29626	32.7557	3.07384e-207	7.63444e-206	458.265	APC
583	ENSG00000157514	0.00052058	7.92156	32.7548	3.14918e-207	7.80814e-206	458.291	TSC22D3
584	ENSG00000188785	-0.000348968	4.53379	-32.7508	3.48862e-207	8.63494e-206	458.307	ZNF548
585	ENSG00000136238	0.000320556	6.81469	32.7303	5.88073e-207	1.45309e-205	457.602	RAC1
586	ENSG00000249138	0.000673621	2.43165	32.7197	7.69872e-207	1.89906e-205	457.523
587	ENSG00000288156	0.000416769	4.90667	32.7179	8.07493e-207	1.98847e-205	457.288	NA
588	ENSG00000106351	-0.000477041	3.547	-32.7081	1.03513e-206	2.5447e-205	457.423	AGFG2
589	ENSG00000151623	-0.000550816	4.86201	-32.689	1.68419e-206	4.13326e-205	456.745	NR3C2
590	ENSG00000134815	0.000494087	5.52541	32.6852	1.85704e-206	4.54975e-205	456.451	DHX34
591	ENSG00000070882	-0.000358242	5.15127	-32.669	2.80632e-206	6.86384e-205	456.146	OSBPL3
592	ENSG00000105352	0.000689468	4.60179	32.653	4.20856e-206	1.02761e-204	455.655	CEACAM4
593	ENSG00000198363	0.000577505	5.78674	32.6518	4.34839e-206	1.05997e-204	455.599	ASPH
594	ENSG00000168234	-0.000354444	5.43489	-32.6495	4.612e-206	1.12233e-204	455.625	TTC39C
595	ENSG00000198105	-0.000392516	4.02924	-32.6241	8.78466e-206	2.13416e-204	455.177	ZNF248
596	ENSG00000177674	0.000412541	5.09018	32.608	1.3259e-205	3.21574e-204	454.492	AGTRAP
597	ENSG00000058600	-0.000284682	4.83362	-32.6036	1.48146e-205	3.58703e-204	454.501	POLR3E
598	ENSG00000118961	-0.000335747	3.93312	-32.5763	2.96347e-205	7.16337e-204	453.962	LDAH
599	ENSG00000171302	0.000417142	5.4568	32.567	3.76018e-205	9.07402e-204	453.437	CANT1
600	ENSG00000109016	0.000285169	3.69915	32.5549	5.11371e-205	1.23198e-203	453.25	DHRS7B
601	ENSG00000174282	-0.000303055	5.06733	-32.5268	1.04494e-204	2.51324e-203	452.524	ZBTB4
602	ENSG00000103522	-0.000470521	4.14084	-32.5193	1.26313e-204	3.03297e-203	452.512	IL21R
603	ENSG00000158711	-0.00024778	7.04296	-32.5187	1.28298e-204	3.07553e-203	452.216	ELK4
604	ENSG00000146592	0.000733463	7.17693	32.506	1.76872e-204	4.23292e-203	451.947	CREB5
605	ENSG00000066084	0.000371998	7.50703	32.5032	1.90236e-204	4.54522e-203	451.857	DIP2B
606	ENSG00000145349	-0.000346845	5.5428	-32.4949	2.34387e-204	5.59086e-203	451.687	CAMK2D
607	ENSG00000164463	0.000332929	7.84336	32.4804	3.38789e-204	8.06786e-203	451.291	CREBRF
608	ENSG00000166261	-0.000319838	3.81854	-32.4484	7.64547e-204	1.81769e-202	450.73	ZNF202
609	ENSG00000137642	0.000591126	10.9946	32.4397	9.52991e-204	2.26198e-202	450.465	SORL1
610	ENSG00000196663	0.000617909	6.61062	32.4383	9.86635e-204	2.338e-202	450.2	TECPR2
611	ENSG00000139496	0.00027445	6.53666	32.4292	1.24188e-203	2.93803e-202	449.942	NUP58
612	ENSG00000125505	0.000612447	6.15613	32.4081	2.12293e-203	5.0142e-202	449.426	MBOAT7
613	ENSG00000265666	0.00047915	2.10787	32.4058	2.2478e-203	5.30049e-202	449.636	RARA-AS1
614	ENSG00000157551	0.000804242	7.6262	32.3994	2.648e-203	6.23402e-202	449.27	KCNJ15
615	ENSG00000153933	-0.000408342	4.67618	-32.3983	2.72029e-203	6.3938e-202	449.352	DGKE
616	ENSG00000135372	-0.000318693	4.59272	-32.3925	3.15526e-203	7.40412e-202	449.185	NAT10
617	ENSG00000241878	0.000505305	5.70353	32.3834	3.96586e-203	9.29117e-202	448.786	PISD
618	ENSG00000108424	0.000302824	7.63284	32.3791	4.42777e-203	1.03565e-201	448.711	KPNB1
619	ENSG00000144040	0.000355915	4.3034	32.373	5.16177e-203	1.20539e-201	448.568	SFXN5
620	ENSG00000175029	0.000337398	5.71129	32.3729	5.18631e-203	1.20916e-201	448.507	CTBP2
621	ENSG00000205045	-0.000453652	5.30125	-32.3652	6.30127e-203	1.46674e-201	448.442	SLFN12L
622	ENSG00000213782	-0.00026901	4.80374	-32.3647	6.3697e-203	1.48029e-201	448.443	DDX47
623	ENSG00000235568	0.000598098	6.30651	32.3637	6.53842e-203	1.51706e-201	448.304	NFAM1
624	ENSG00000011376	-0.000254228	4.48381	-32.3601	7.17112e-203	1.6612e-201	448.361	LARS2
625	ENSG00000135083	0.000755503	4.86476	32.3552	8.12025e-203	1.87805e-201	448.087	CCNJL
626	ENSG00000151151	0.000504949	6.11056	32.3544	8.2709e-203	1.90984e-201	448.054	IPMK
627	ENSG00000272501	0.000419689	4.69664	32.3393	1.21283e-202	2.79609e-201	447.684
628	ENSG00000179299	0.000648542	2.70501	32.3363	1.30807e-202	3.01086e-201	447.759	NSUN7
629	ENSG00000105339	0.000583399	7.95029	32.3249	1.74754e-202	4.01601e-201	447.382	DENND3
630	ENSG00000106348	0.000495178	5.78441	32.317	2.1367e-202	4.90253e-201	447.109	IMPDH1
631	ENSG00000154889	0.0003617	6.36011	32.3088	2.62616e-202	6.01602e-201	446.894	MPPE1
632	ENSG00000118308	0.000345434	7.1321	32.3035	3.00408e-202	6.87087e-201	446.782	LRMP
633	ENSG00000011600	0.000491959	7.225	32.2985	3.40533e-202	7.77631e-201	446.676	TYROBP
634	ENSG00000109323	0.000312976	6.61264	32.2914	4.08381e-202	9.31095e-201	446.456	MANBA
635	ENSG00000129158	-0.000330876	3.91931	-32.289	4.33461e-202	9.86722e-201	446.676	SERGEF
636	ENSG00000109133	0.000286333	6.64953	32.2735	6.42122e-202	1.45941e-200	446.002	TMEM33
637	ENSG00000143799	-0.000302206	6.52895	-32.2512	1.12814e-201	2.56e-200	445.447	PARP1
638	ENSG00000103356	-0.000323584	3.66424	-32.2428	1.39619e-201	3.16332e-200	445.556	EARS2
639	ENSG00000151690	-0.000268367	5.33962	-32.2372	1.60559e-201	3.62878e-200	445.159	MFSD6
640	ENSG00000167536	0.00051522	4.58919	32.2372	1.60665e-201	3.62878e-200	445.11	DHRS13
641	ENSG00000135604	0.000492349	6.2778	32.2368	1.62218e-201	3.65814e-200	445.082	STX11
642	ENSG00000112096	0.000618542	10.562	32.2188	2.55521e-201	5.7532e-200	444.851	SOD2
643	ENSG00000112159	-0.000352338	6.81196	-32.2137	2.9077e-201	6.53668e-200	444.504	MDN1
644	ENSG00000130024	-0.00034584	5.24933	-32.2089	3.28287e-201	7.36862e-200	444.479	PHF10
645	ENSG00000112365	-0.000250113	5.13338	-32.1997	4.14591e-201	9.29133e-200	444.229	ZBTB24
646	ENSG00000188404	0.000486667	9.64866	32.1901	5.27558e-201	1.18047e-199	444.057	SELL
647	ENSG00000131844	-0.000298912	3.99252	-32.1895	5.36736e-201	1.19915e-199	444.143	MCCC2
648	ENSG00000211751	-0.000488971	6.65248	-32.1893	5.38494e-201	1.20122e-199	443.912	TRBC1
649	ENSG00000130775	0.0004366	8.14883	32.187	5.70593e-201	1.27087e-199	443.895	THEMIS2
650	ENSG00000122694	0.000389789	7.01949	32.1817	6.52303e-201	1.45062e-199	443.707	GLIPR2
651	ENSG00000154310	-0.000333936	5.99958	-32.1581	1.18368e-200	2.62828e-199	443.129	TNIK
652	ENSG00000140382	-0.000225807	5.03316	-32.1329	2.23989e-200	4.96588e-199	442.546	HMG20A
653	ENSG00000077420	0.000446202	6.54669	32.126	2.66166e-200	5.89193e-199	442.289	APBB1IP
654	ENSG00000185418	-0.000343024	4.22933	-32.1183	3.23821e-200	7.15724e-199	442.321	TARSL2
655	ENSG00000129450	0.000491178	5.24819	32.0967	5.57306e-200	1.2299e-198	441.545	SIGLEC9
656	ENSG00000160208	-0.000329905	4.28444	-32.0957	5.72015e-200	1.26044e-198	441.74	RRP1B
657	ENSG00000196549	0.000777968	8.54824	32.0876	7.00865e-200	1.54201e-198	441.438	MME
658	ENSG00000169896	0.000510114	6.86543	32.0858	7.34068e-200	1.61261e-198	441.293	ITGAM
659	ENSG00000169045	-0.000238946	8.45729	-32.0737	9.96874e-200	2.18662e-198	440.988	HNRNPH1
660	ENSG00000138190	0.000381623	5.50162	32.0724	1.02833e-199	2.2522e-198	440.924	EXOC6
661	ENSG00000132286	-0.000255907	4.43399	-32.0705	1.07944e-199	2.36056e-198	441.057	TIMM10B
662	ENSG00000108061	0.000309257	7.19286	32.066	1.20855e-199	2.63892e-198	440.787	SHOC2
663	ENSG00000137509	0.000308638	6.73256	32.0424	2.19303e-199	4.78133e-198	440.177	PRCP
664	ENSG00000131355	0.000584101	6.32582	32.0385	2.41763e-199	5.26309e-198	440.089	ADGRE3
665	ENSG00000150977	0.000351424	5.32926	32.0253	3.3727e-199	7.33119e-198	439.739	RILPL2
666	ENSG00000170956	0.000559673	4.80902	32.0087	5.1278e-199	1.11295e-197	439.339	CEACAM3
667	ENSG00000163026	-0.000339574	3.42613	-32.0034	5.85784e-199	1.26949e-197	439.576	WDCP
668	ENSG00000205423	0.000356992	4.83539	31.9952	7.19436e-199	1.5568e-197	438.999	CNEP1R1
669	ENSG00000108946	0.000369705	8.46686	31.988	8.63414e-199	1.86557e-197	438.885	PRKAR1A
670	ENSG00000138134	-0.000407612	4.49262	-31.9715	1.30574e-198	2.81708e-197	438.604	STAMBPL1
671	ENSG00000071575	-0.000387307	5.65371	-31.9713	1.31431e-198	2.83135e-197	438.459	TRIB2
672	ENSG00000089123	-0.000332917	3.28796	-31.9686	1.40554e-198	3.02337e-197	438.728	TASP1
673	ENSG00000125630	-0.000282265	4.71515	-31.9663	1.48885e-198	3.19782e-197	438.407	POLR1B
674	ENSG00000122862	0.000607476	9.68271	31.964	1.57933e-198	3.38713e-197	438.376	SRGN
675	ENSG00000135870	0.000306604	7.60929	31.9544	2.0062e-198	4.29623e-197	437.996	RC3H1
676	ENSG00000189077	0.000431911	4.14264	31.94	2.8852e-198	6.16945e-197	437.652	TMEM120A
677	ENSG00000186416	-0.000324097	3.52755	-31.9207	4.68493e-198	1.00031e-196	437.475	NKRF
678	ENSG00000158769	0.000455865	5.87488	31.9192	4.86429e-198	1.03707e-196	437.073	F11R
679	ENSG00000131876	-0.00033377	3.94487	-31.9173	5.10759e-198	1.08734e-196	437.307	SNRPA1
680	ENSG00000140995	0.00043463	6.40217	31.9166	5.19128e-198	1.10353e-196	437.02	DEF8
681	ENSG00000111785	-0.000312902	4.16005	-31.8951	8.92118e-198	1.89362e-196	436.709	RIC8B
682	ENSG00000176597	0.000564517	4.09398	31.8757	1.45024e-197	3.07379e-196	436.034	B3GNT5
683	ENSG00000116017	0.000466582	4.96365	31.8743	1.50321e-197	3.18138e-196	435.961	ARID3A
684	ENSG00000198961	0.000302161	8.05946	31.8556	2.40318e-197	5.07864e-196	435.535	PJA2
685	ENSG00000175054	-0.000272954	6.91256	-31.8515	2.66417e-197	5.62198e-196	435.382	ATR
686	ENSG00000174718	0.000422302	10.4009	31.844	3.22133e-197	6.78781e-196	435.383	KIAA1551
687	ENSG00000171988	0.000375199	8.78519	31.8391	3.63917e-197	7.65709e-196	435.163	JMJD1C
688	ENSG00000258082	0.000478548	1.84812	31.8366	3.87344e-197	8.13816e-196	435.335
689	ENSG00000108559	-0.000324169	4.73461	-31.8239	5.33355e-197	1.11896e-195	434.837	NUP88
690	ENSG00000114331	0.000334354	8.41938	31.8232	5.42105e-197	1.13567e-195	434.742	ACAP2
691	ENSG00000163563	0.000586464	10.0406	31.8209	5.74605e-197	1.20201e-195	434.803	MNDA
692	ENSG00000083123	-0.000393345	3.17893	-31.8037	8.83979e-197	1.84652e-195	434.633	BCKDHB
693	ENSG00000115310	0.000255728	6.08042	31.7876	1.32494e-196	2.76364e-195	433.763	RTN4
694	ENSG00000135506	0.00030819	6.70417	31.7873	1.33399e-196	2.7785e-195	433.771	OS9
695	ENSG00000231074	-0.000307712	6.98501	-31.7851	1.40903e-196	2.93058e-195	433.718	HCG18
696	ENSG00000186529	0.000732733	6.84893	31.7804	1.58518e-196	3.29221e-195	433.637	CYP4F3
697	ENSG00000100991	0.000220072	6.5719	31.7629	2.46256e-196	5.10707e-195	433.149	TRPC4AP
698	ENSG00000033867	-0.000372699	6.22628	-31.7599	2.65608e-196	5.50053e-195	433.121	SLC4A7
699	ENSG00000135127	-0.000550369	2.96684	-31.7549	3.00783e-196	6.22005e-195	433.496	BICDL1
700	ENSG00000100503	0.000271263	8.77318	31.7543	3.05548e-196	6.30956e-195	433.027	NIN
701	ENSG00000111321	0.000438078	4.26357	31.7534	3.12263e-196	6.43903e-195	432.962	LTBR
702	ENSG00000243943	-0.000229405	5.25147	-31.7504	3.36426e-196	6.92741e-195	432.915	ZNF512
703	ENSG00000163421	0.000808172	6.16202	31.7448	3.87456e-196	7.96681e-195	432.727	PROK2
704	ENSG00000145734	-0.00025937	6.83186	-31.7425	4.10435e-196	8.42732e-195	432.647	BDP1
705	ENSG00000146859	0.000531463	6.87613	31.7409	4.2749e-196	8.76505e-195	432.63	TMEM140
706	ENSG00000254477	0.000484376	1.42785	31.7384	4.55092e-196	9.31779e-195	432.939
707	ENSG00000197943	0.000346813	7.58351	31.7349	4.95788e-196	1.01367e-194	432.494	PLCG2
708	ENSG00000133422	-0.000281616	4.98323	-31.7203	7.16282e-196	1.46241e-194	432.199	MORC2
709	ENSG00000089094	-0.000288763	4.53946	-31.7187	7.45031e-196	1.51896e-194	432.217	KDM2B
710	ENSG00000166750	-0.000371022	7.63962	-31.7023	1.12307e-195	2.28648e-194	431.65	SLFN5
711	ENSG00000176463	0.000369157	6.05851	31.7001	1.18655e-195	2.41231e-194	431.576	SLCO3A1
712	ENSG00000101307	0.000610688	6.24134	31.6974	1.27114e-195	2.58066e-194	431.528	SIRPB1
713	ENSG00000173597	0.000729676	6.38589	31.6928	1.42304e-195	2.885e-194	431.427	SULT1B1
714	ENSG00000100330	0.000469051	7.34054	31.6838	1.78432e-195	3.61238e-194	431.215	MTMR3
715	ENSG00000162894	-0.000510408	4.94688	-31.6753	2.2101e-195	4.46811e-194	431.137	FCMR
716	ENSG00000176407	0.000197316	5.85579	31.6577	3.42951e-195	6.92368e-194	430.509	KCMF1
717	ENSG00000177034	-0.000411179	4.43805	-31.6491	4.25018e-195	8.56852e-194	430.535	MTX3
718	ENSG00000140455	0.000256187	7.04692	31.6279	7.21878e-195	1.45331e-193	429.788	USP3
719	ENSG00000164038	-0.000439165	2.92476	-31.6141	1.02054e-194	2.05172e-193	429.951	SLC9B2
720	ENSG00000103365	-0.000293028	6.33956	-31.608	1.1895e-194	2.38809e-193	429.292	GGA2
721	ENSG00000136167	0.000361853	10.9211	31.5865	2.03583e-194	4.0813e-193	428.967	LCP1
722	ENSG00000116127	-0.000293651	6.77338	-31.5864	2.03853e-194	4.0813e-193	428.748	ALMS1
723	ENSG00000178802	-0.000351966	4.13009	-31.5782	2.50004e-194	4.99835e-193	428.792	MPI
724	ENSG00000110080	0.000522559	3.91973	31.5636	3.59981e-194	7.1872e-193	428.238	ST3GAL4
725	ENSG00000275835	-0.000361327	3.77487	-31.5619	3.7604e-194	7.49745e-193	428.452	TUBGCP5
726	ENSG00000156675	0.000502261	8.32401	31.5463	5.5487e-194	1.10477e-192	427.829	RAB11FIP1
727	ENSG00000156931	0.000325562	7.43638	31.5389	6.66992e-194	1.32618e-192	427.587	VPS8
728	ENSG00000177885	0.000345896	7.87508	31.5327	7.80011e-194	1.54877e-192	427.452	GRB2
729	ENSG00000069974	0.000330644	6.47866	31.5186	1.10728e-193	2.19558e-192	427.05	RAB27A
730	ENSG00000151065	-0.000336913	3.31042	-31.5082	1.43503e-193	2.84156e-192	427.198	DCP1B
731	ENSG00000175792	-0.000320268	4.08291	-31.4997	1.77788e-193	3.51564e-192	426.83	RUVBL1
732	ENSG00000136048	0.000395167	3.81275	31.4982	1.8447e-193	3.64278e-192	426.622	DRAM1
733	ENSG00000086300	0.000468278	6.45951	31.4886	2.34158e-193	4.61767e-192	426.311	SNX10
734	ENSG00000163191	0.000583556	6.07042	31.4869	2.44592e-193	4.81686e-192	426.27	S100A11
735	ENSG00000108788	0.000224817	5.46047	31.4831	2.68953e-193	5.28941e-192	426.155	MLX
736	ENSG00000138796	-0.000312499	3.69119	-31.483	2.69382e-193	5.29065e-192	426.484	HADH
737	ENSG00000116815	0.000332814	5.09853	31.4765	3.16822e-193	6.21392e-192	426.002	CD58
738	ENSG00000180871	0.000733331	8.47655	31.4748	3.30136e-193	6.46628e-192	426.077	CXCR2
739	ENSG00000105514	0.00056966	6.51941	31.4707	3.6643e-193	7.16745e-192	425.872	RAB3D
740	ENSG00000152465	-0.000430295	4.41188	-31.4677	3.94749e-193	7.71094e-192	426.017	NMT2
741	ENSG00000152409	-0.000352188	4.666	-31.4395	7.95925e-193	1.55264e-191	425.256	JMY
742	ENSG00000225342	0.000511705	4.19106	31.4295	1.02139e-192	1.98978e-191	424.872
743	ENSG00000008130	0.000514007	7.60932	31.4256	1.12726e-192	2.19307e-191	424.789	NADK
744	ENSG00000198874	-0.000259308	4.18498	-31.4184	1.34655e-192	2.61618e-191	424.772	TYW1
745	ENSG00000198431	0.000325118	6.80145	31.4071	1.78617e-192	3.46565e-191	424.279	TXNRD1
746	ENSG00000113163	0.000225311	6.78149	31.3978	2.25156e-192	4.36278e-191	424.04	COL4A3BP
747	ENSG00000168685	-0.000437386	9.27918	-31.3938	2.48543e-192	4.80948e-191	423.99	IL7R
748	ENSG00000159314	0.000380513	6.58663	31.3912	2.65029e-192	5.12164e-191	423.887	ARHGAP27
749	ENSG00000147459	0.000606678	8.32061	31.3889	2.81121e-192	5.42537e-191	423.917	DOCK5
750	ENSG00000214212	0.000445216	4.94494	31.3849	3.10489e-192	5.98416e-191	423.731	C19orf38
751	ENSG00000124126	0.000514857	8.87572	31.3817	3.35709e-192	6.46162e-191	423.761	PREX1
752	ENSG00000196189	0.000567908	5.68446	31.3817	3.36421e-192	6.46671e-191	423.643	SEMA4A
753	ENSG00000035664	0.000572789	5.64572	31.3813	3.39302e-192	6.51342e-191	423.633	DAPK2
754	ENSG00000184205	-0.000482396	3.40311	-31.3738	4.08893e-192	7.83892e-191	423.874	TSPYL2
755	ENSG00000134900	-0.000226841	7.09485	-31.3707	4.42289e-192	8.46793e-191	423.365	TPP2
756	ENSG00000109854	0.000316563	4.89811	31.3377	1.00483e-191	1.92127e-190	422.554	HTATIP2
757	ENSG00000247626	-0.000367086	3.61738	-31.3138	1.82012e-191	3.47554e-190	422.309	MARS2
758	ENSG00000169228	0.000419177	5.80695	31.2831	3.89976e-191	7.43681e-190	421.188	RAB24
759	ENSG00000001497	-0.000276459	4.38096	-31.2824	3.96655e-191	7.55422e-190	421.363	LAS1L
760	ENSG00000185973	0.000274716	5.1645	31.2497	8.94506e-191	1.70133e-189	420.361	TMLHE
761	ENSG00000163931	0.000491949	8.54523	31.2494	9.01596e-191	1.71256e-189	420.455	TKT
762	ENSG00000243406	-0.000402225	2.9325	-31.2492	9.05547e-191	1.71781e-189	420.855	MRPS31P5
763	ENSG00000134313	0.000240735	7.64362	31.2465	9.67189e-191	1.83234e-189	420.314	KIDINS220
764	ENSG00000105856	0.000298789	7.40698	31.2399	1.1403e-190	2.15746e-189	420.145	HBP1
765	ENSG00000168404	0.000318423	5.99103	31.2307	1.43237e-190	2.70653e-189	419.881	MLKL
766	ENSG00000101336	0.000529744	8.44915	31.2259	1.61277e-190	3.04342e-189	419.872	HCK
767	ENSG00000185379	-0.000312658	4.11268	-31.1948	3.49015e-190	6.57759e-189	419.243	RAD51D
768	ENSG00000143409	0.000503835	5.375	31.1803	5.00343e-190	9.41727e-189	418.641	FAM63A
769	ENSG00000130066	0.000420758	7.98694	31.1762	5.53991e-190	1.04134e-188	418.604	SAT1
770	ENSG00000122965	-0.000305189	4.98923	-31.1573	8.85849e-190	1.66298e-188	418.184	RBM19
771	ENSG00000172845	0.000253958	8.31283	31.1552	9.32008e-190	1.74736e-188	418.082	SP3
772	ENSG00000185963	0.000298758	6.47148	31.1535	9.72246e-190	1.82044e-188	417.974	BICD2
773	ENSG00000064225	0.000437821	4.04963	31.1308	1.70511e-189	3.18853e-188	417.471	ST3GAL6
774	ENSG00000119321	0.000256471	6.83471	31.1255	1.94682e-189	3.63583e-188	417.287	FKBP15
775	ENSG00000157450	0.000245363	5.71133	31.1093	2.90875e-189	5.42528e-188	416.871	RNF111
776	ENSG00000140332	0.000531904	6.55512	31.1086	2.95618e-189	5.50665e-188	416.883	TLE3
777	ENSG00000120306	0.000628603	4.27533	31.1059	3.16026e-189	5.87922e-188	416.837	CYSTM1
778	ENSG00000003756	0.000155731	8.13735	31.1039	3.32329e-189	6.17457e-188	416.795	RBM5
779	ENSG00000197603	-0.000369425	4.92782	-31.102	3.47999e-189	6.45742e-188	416.844	C5orf42
780	ENSG00000117676	0.000366347	7.48188	31.0764	6.56438e-189	1.21651e-187	416.106	RPS6KA1
781	ENSG00000090470	-0.000283182	3.79735	-31.0698	7.73652e-189	1.4319e-187	416.197	PDCD7
782	ENSG00000090316	0.000321675	5.62794	31.0623	9.31128e-189	1.72116e-187	415.714	MAEA
783	ENSG00000117298	0.000506253	6.75811	31.0585	1.02217e-188	1.88703e-187	415.648	ECE1
784	ENSG00000119004	-0.000223041	5.43048	-31.0558	1.09419e-188	2.01742e-187	415.614	CYP20A1
785	ENSG00000111802	0.000388459	6.01733	31.0555	1.10065e-188	2.02674e-187	415.546	TDP2
786	ENSG00000116120	-0.000302893	4.17654	-31.0375	1.7208e-188	3.16465e-187	415.342	FARSB
787	ENSG00000110880	0.000405214	6.72976	31.0365	1.76325e-188	3.2386e-187	415.093	CORO1C
788	ENSG00000143390	-0.000232046	5.72267	-31.0308	2.0285e-188	3.72107e-187	414.975	RFX5
789	ENSG00000100612	0.000343542	6.30297	31.0285	2.1475e-188	3.93436e-187	414.88	DHRS7
790	ENSG00000166260	-0.000326616	4.54856	-31.0148	3.01628e-188	5.51903e-187	414.731	COX11
791	ENSG00000151553	0.000365921	5.96765	31	4.34834e-188	7.9463e-187	414.173	FAM160B1
792	ENSG00000169902	0.000786661	3.37148	30.9961	4.7792e-188	8.72265e-187	414.177	TPST1
793	ENSG00000124198	-0.000193365	6.13074	-30.9924	5.24481e-188	9.56037e-187	414.001	ARFGEF2
794	ENSG00000178562	-0.000494543	6.22738	-30.9915	5.3566e-188	9.75184e-187	414.034	CD28
795	ENSG00000259642	0.000424976	2.19249	30.9841	6.42965e-188	1.16906e-186	414.09	ST20-AS1
796	ENSG00000000938	0.000390003	8.16758	30.9668	9.86902e-188	1.79217e-186	413.433	FGR
797	ENSG00000163564	-0.000526167	5.4203	-30.964	1.05611e-187	1.91544e-186	413.413	PYHIN1
798	ENSG00000109680	-0.000544196	3.21664	-30.9574	1.24475e-187	2.25475e-186	413.604	TBC1D19
799	ENSG00000184005	0.000451906	2.43707	30.9288	2.52209e-187	4.56281e-186	412.687	ST6GALNAC3
800	ENSG00000152495	-0.000513687	6.79054	-30.9123	3.78683e-187	6.84233e-186	412.061	CAMK4
801	ENSG00000114480	0.000307303	4.82197	30.9119	3.81997e-187	6.89359e-186	412.022	GBE1
802	ENSG00000138764	0.000345028	6.09695	30.8981	5.38086e-187	9.6983e-186	411.659	CCNG2
803	ENSG00000082458	-0.000581759	2.71357	-30.8904	6.49469e-187	1.16912e-185	412.071	DLG3
804	ENSG00000149136	-0.000266062	5.0349	-30.8844	7.52902e-187	1.35363e-185	411.431	SSRP1
805	ENSG00000130921	-0.000338601	3.98158	-30.8836	7.69416e-187	1.3816e-185	411.587	C12orf65
806	ENSG00000174007	0.000534454	4.54581	30.8789	8.6273e-187	1.54724e-185	411.216	CEP19
807	ENSG00000057935	-0.000397041	3.14466	-30.8709	1.05173e-186	1.88386e-185	411.46	MTA3
808	ENSG00000117899	-0.000193889	5.10131	-30.8708	1.05491e-186	1.88721e-185	411.07	MESDC2
809	ENSG00000109452	-0.000473522	7.16469	-30.868	1.1291e-186	2.01745e-185	410.952	INPP4B
810	ENSG00000138614	-0.000264812	4.27845	-30.8613	1.33117e-186	2.37557e-185	410.964	VWA9
811	ENSG00000024048	0.000368557	8.51077	30.8553	1.54587e-186	2.75532e-185	410.696	UBR2
812	ENSG00000086102	-0.000203261	5.30892	-30.8538	1.60278e-186	2.85323e-185	410.633	NFX1
813	ENSG00000181444	0.000508441	3.00141	30.8476	1.8648e-186	3.31558e-185	410.582	ZNF467
814	ENSG00000103550	-0.000312673	3.72837	-30.8282	3.00877e-186	5.34297e-185	410.265	KNOP1
815	ENSG00000174206	-0.000367539	3.30824	-30.8225	3.46554e-186	6.14655e-185	410.226	C12orf66
816	ENSG00000135636	0.000803248	6.72124	30.8154	4.12951e-186	7.3152e-185	409.675	DYSF
817	ENSG00000196209	0.000578294	5.67501	30.8131	4.36893e-186	7.72986e-185	409.576	SIRPB2
818	ENSG00000142867	0.000240864	5.1528	30.8057	5.24237e-186	9.26388e-185	409.394	BCL10
819	ENSG00000140396	0.000320195	7.8022	30.7953	6.7746e-186	1.19569e-184	409.18	NCOA2
820	ENSG00000233461	0.000476634	1.73097	30.7944	6.9264e-186	1.22099e-184	409.471
821	ENSG00000008516	0.000770077	6.66331	30.7864	8.42838e-186	1.48395e-184	408.96	MMP25
822	ENSG00000136560	0.000268434	6.78403	30.7577	1.70887e-185	3.00507e-184	408.212	TANK
823	ENSG00000140598	-0.000239415	4.42339	-30.755	1.8267e-185	3.20837e-184	408.318	EFL1
824	ENSG00000074696	-0.000361962	4.27555	-30.7413	2.5532e-185	4.47895e-184	408.045	HACD3
825	ENSG00000140932	0.000648795	4.94601	30.7361	2.90508e-185	5.09004e-184	407.694	CMTM2
826	ENSG00000267554	-0.000506812	3.40839	-30.7328	3.15314e-185	5.51799e-184	408.023
[truncated: 13,629 more rows]

## Sheet: Proteomics_NLR
e-Table 5: Proteomics analysis of NLR
[truncated: 4,980 more rows]

## Sheet: Proteomics_PLR
e-Table 6: Proteomics analysis of PLR
[truncated: 4,980 more rows]

## Sheet: Proteomics_SII
e-Table 7: Proteomics analysis of SII
[truncated: 4,980 more rows]
