# Supplementary material for: Blood cell ratio biomarkers of systemic inflammation in chronic obstructive pulmonary disease
Source: Respir Res. 2026 Mar 18;27:184. doi: 10.1186/s12931-026-03632-3 (PMC13113035; doi:10.1186/s12931-026-03632-3)
Supplement: Supplementary file 3 — Supplementary Material 3. [file 12931_2026_3632_MOESM3_ESM.xlsx]

## Sheet: NLR
e-Table 8: RNA-seq pathway enrichment for NLR (P-adjusted<0.05)
pathwy.id	description	pvalues	Bonferroni	successes	PathwaySize	N	sample.size	GenesinPathway
HALLMARK_APOPTOSIS	https://www.gsea-msigdb.org/gsea/msigdb/human/geneset/HALLMARK_APOPTOSIS	1.629e-07	8.145e-06	16.59	5077.57	352711	218.78	CDC25B	CFLAR	CREBBP	DNAJC3	IFNGR1	NEDD9	PSEN1	ROCK1	TIMP2
HALLMARK_IL6_JAK_STAT3_SIGNALING	https://www.gsea-msigdb.org/gsea/msigdb/human/geneset/HALLMARK_IL6_JAK_STAT3_SIGNALING	1.903e-07	9.515e-06	9.45	1322.12	352711	218.78	CBL	CSF2RB	IFNGR1	IL1R1	IL1R2	TNFRSF1A	TYK2
HALLMARK_ANDROGEN_RESPONSE	https://www.gsea-msigdb.org/gsea/msigdb/human/geneset/HALLMARK_ANDROGEN_RESPONSE	4.128e-07	2.064e-05	12.71	2933.72	352711	218.78	ACTN1	CAMKK2	ELOVL5	GNAI3	HMGCR	PIAS1	VAPA
HALLMARK_ALLOGRAFT_REJECTION	https://www.gsea-msigdb.org/gsea/msigdb/human/geneset/HALLMARK_ALLOGRAFT_REJECTION	0.0005657	0.02828	17.1	10975.3	352711	218.78	FGR	IFNGR1	ITK	NCF4	SPI1	ST8SIA4	ZAP70
REACTOME_NEUTROPHIL_DEGRANULATION	https://www.gsea-msigdb.org/gsea/msigdb/human/geneset/REACTOME_NEUTROPHIL_DEGRANULATION	5.52e-65	7.099e-62	139.3	39515.3	740842	454.96	ACAA1	ALOX5	ASAH1	ATP11A	ATP11B	BIN2	BST1	CAND1	CMTM6	DNAJC3	DNAJC5	FGR	GCA	IMPDH1	KPNB1	LAMP2	MANBA	MAPK1	MAPK14	PSEN1	PYGL	QPCT	RAB3D	RAB7A	ROCK1	SERPINB1	SIRPB1	SLC11A1	SLC2A3	TCIRG1	TIMP2	TYROBP	VAPA
REACTOME_INTERLEUKIN_1_SIGNALING	https://www.gsea-msigdb.org/gsea/msigdb/human/geneset/REACTOME_INTERLEUKIN_1_SIGNALING	2.91e-11	3.742e-08	9.46	477.02	740842	454.96	ALPK1	IL1R1	IL1R2	IRAK3	MAP2K4	N4BP1
REACTOME_ANTIGEN_PROCESSING_UBIQUITINATION_PROTEASOME_DEGRADATION	https://www.gsea-msigdb.org/gsea/msigdb/human/geneset/REACTOME_ANTIGEN_PROCESSING_UBIQUITINATION_PROTEASOME_DEGRADATION	1.18e-10	1.517e-07	44.8	23548.4	740842	454.96	FBXL20	FBXO31	KLHL2	RNF130	UBA5	UBE2D3	UBE2R2	UBE2W	UBE3A	UBR2	WSB1
REACTOME_SIGNALING_BY_BRAF_AND_RAF1_FUSIONS	https://www.gsea-msigdb.org/gsea/msigdb/human/geneset/REACTOME_SIGNALING_BY_BRAF_AND_RAF1_FUSIONS	1.786e-07	0.0002297	7.05	633.87	740842	454.96	AGK	APBB1IP	KDM7A	MAPK1	PEBP1	QKI
REACTOME_RHOH_GTPASE_CYCLE	https://www.gsea-msigdb.org/gsea/msigdb/human/geneset/REACTOME_RHOH_GTPASE_CYCLE	3.866e-06	0.004972	4.94	165.1	740842	454.96	NSFL1C	RAB7A	ROCK1	SLC4A7	TMEM59	ZAP70

## Sheet: PLR
e-Table 9: RNA-seq pathway enrichment for PLR (P-adjusted<0.05)
pathwy.id	description	pvalues	Bonferroni	successes	PathwaySize	N	sample.size	GenesinPathway
GOBP_PLATELET_ACTIVATION	https://www.gsea-msigdb.org/gsea/msigdb/human/geneset/GOBP_PLATELET_ACTIVATION	2.473e-06	0.01747	3.49	148.18	624396	106.21	DGKE	ENTPD1	GP9	ILK	LCK	SELP	TREML1	TUBB1	VCL
HALLMARK_ALLOGRAFT_REJECTION	https://www.gsea-msigdb.org/gsea/msigdb/human/geneset/HALLMARK_ALLOGRAFT_REJECTION	6.708e-22	3.354e-20	37.7	10975.3	352711	158.19	ABCE1	CD2	CD3D	CD3G	CD96	CFP	ETS1	ITK	LCK	STAT4	ZAP70
HALLMARK_COMPLEMENT	https://www.gsea-msigdb.org/gsea/msigdb/human/geneset/HALLMARK_COMPLEMENT	6.129e-15	3.064e-13	29.33	10565.3	352711	158.19	CALM3	CLU	DOCK10	DOCK9	DYRK2	GP9	LCK	RASGRP1	SPOCK2	USP15
KEGG_MEDICUS_REFERENCE_TCR_PLCG_ITPR_SIGNALING_PATHWAY	https://www.gsea-msigdb.org/gsea/msigdb/human/geneset/KEGG_MEDICUS_REFERENCE_TCR_PLCG_ITPR_SIGNALING_PATHWAY	6.17e-18	2.345e-15	10.32	124.16	23828.2	22.48	CD3D	CD3G	ITPR3	LCK	PLCG1	ZAP70
REACTOME_RHO_GTPASE_CYCLE	https://www.gsea-msigdb.org/gsea/msigdb/human/geneset/REACTOME_RHO_GTPASE_CYCLE	4.571e-14	5.878e-11	28.36	12676.7	740842	267.86	ARHGAP18	ARHGAP6	DOCK10	DOCK9	FAM169A	FGD4	LAMTOR1	LCK	MAP3K11	MTR	MYO9A	RALGAPA1	RHOH	RRAS2	SEMA4F	SLC4A7	ZAP70
REACTOME_RHOH_GTPASE_CYCLE	https://www.gsea-msigdb.org/gsea/msigdb/human/geneset/REACTOME_RHOH_GTPASE_CYCLE	4.143e-13	5.328e-10	7.65	165.1	740842	267.86	LAMTOR1	LCK	MTR	RALGAPA1	RHOH	SLC4A7	ZAP70
REACTOME_RRNA_MODIFICATION_IN_THE_NUCLEUS_AND_CYTOSOL	https://www.gsea-msigdb.org/gsea/msigdb/human/geneset/REACTOME_RRNA_MODIFICATION_IN_THE_NUCLEUS_AND_CYTOSOL	5.193e-09	6.678e-06	9	1474.85	740842	267.86	HEATR1	KRR1	NOP58	UTP20	WDR36
REACTOME_RESPONSE_TO_ELEVATED_PLATELET_CYTOSOLIC_CA2	https://www.gsea-msigdb.org/gsea/msigdb/human/geneset/REACTOME_RESPONSE_TO_ELEVATED_PLATELET_CYTOSOLIC_CA2	7.133e-09	9.173e-06	14.7	5037.9	740842	267.86	CLU	LHFPL2	PSAP	SELP	SPARC	STXBP2	TUBA4A	VCL
REACTOME_IMMUNOREGULATORY_INTERACTIONS_BETWEEN_A_LYMPHOID_AND_A_NON_LYMPHOID_CELL	https://www.gsea-msigdb.org/gsea/msigdb/human/geneset/REACTOME_IMMUNOREGULATORY_INTERACTIONS_BETWEEN_A_LYMPHOID_AND_A_NON_LYMPHOID_CELL	2.08e-07	0.0002675	15.55	7711.9	740842	267.86	CD3D	CD3G	CD96	CLEC2D	SH2D1A	SLAMF6	TREML1
REACTOME_GENERATION_OF_SECOND_MESSENGER_MOLECULES	https://www.gsea-msigdb.org/gsea/msigdb/human/geneset/REACTOME_GENERATION_OF_SECOND_MESSENGER_MOLECULES	3.615e-07	0.0004649	4.2	154.44	740842	267.86	CD3D	CD3G	EVL	ITK	LCK	PLCG1	ZAP70
REACTOME_PLATELET_ACTIVATION_SIGNALING_AND_AGGREGATION	https://www.gsea-msigdb.org/gsea/msigdb/human/geneset/REACTOME_PLATELET_ACTIVATION_SIGNALING_AND_AGGREGATION	5.159e-07	0.0006634	10.16	3329.11	740842	267.86	ARRB2	CLU	DGKE	GP9	ITPR3	LCK	LHFPL2	PRKCH	PSAP	RASGRP1	SELP	SPARC	STXBP2	TUBA4A	VCL

## Sheet: SII
e-Table 10: RNA-seq pathway enrichment for SII (P-adjusted<0.05)
pathwy.id	description	pvalues	Bonferroni	successes	PathwaySize	N	sample.size	GenesinPathway
GOMF_DNA_BINDING_TRANSCRIPTION_REPRESSOR_ACTIVITY	https://www.gsea-msigdb.org/gsea/msigdb/human/geneset/GOMF_DNA_BINDING_TRANSCRIPTION_REPRESSOR_ACTIVITY	2.859e-11	2.02e-07	12.58	3961.51	624396	122.3	BCL6	CEBPB	ETS2	JDP2	KLF12	MXD1	NFIL3	ZBTB18	ZBTB25	ZBTB34
GOMF_CYTOKINE_RECEPTOR_ACTIVITY	https://www.gsea-msigdb.org/gsea/msigdb/human/geneset/GOMF_CYTOKINE_RECEPTOR_ACTIVITY	7.211e-07	0.005095	4	339.72	624396	122.3	CSF2RA	CSF3R	IFNGR2	IL10RB	IL13RA1	IL1R2	IL1RAP	IL6R
GOCC_VACUOLAR_MEMBRANE	https://www.gsea-msigdb.org/gsea/msigdb/human/geneset/GOCC_VACUOLAR_MEMBRANE	6.917e-06	0.04888	6.37	2296.65	624396	122.3	AP5B1	CHMP3	CKAP4	CMTM6	CSF3R	FNIP1	LAMP2	LRBA	PSEN1	RRAGD	SH3GLB1	SLC11A1	SLC31A2	SPAG9	TLR8	TM6SF1	VMP1
HALLMARK_TNFA_SIGNALING_VIA_NFKB	https://www.gsea-msigdb.org/gsea/msigdb/human/geneset/HALLMARK_TNFA_SIGNALING_VIA_NFKB	4.062e-51	2.031e-49	74.39	8043.15	352711	318.37	B4GALT5	BCL6	CEBPB	CEBPD	CFLAR	DENND5A	DUSP1	ETS2	IFNGR2	IRS2	KLF6	MCL1	MXD1	NAMPT	NFE2L2	NFIL3	PTPRE	SLC2A3	TLR2	TRIB1
HALLMARK_INFLAMMATORY_RESPONSE	https://www.gsea-msigdb.org/gsea/msigdb/human/geneset/HALLMARK_INFLAMMATORY_RESPONSE	5.37e-31	2.685e-29	58.87	9285.57	352711	318.37	AQP9	BEST1	CD55	CSF3R	IFNGR2	KCNJ2	KLF6	MXD1	NAMPT	PSEN1	PTPRE	RAF1	RASGRP1	RNF144B	SLC31A2	TLR1	TLR2
HALLMARK_COMPLEMENT	https://www.gsea-msigdb.org/gsea/msigdb/human/geneset/HALLMARK_COMPLEMENT	1.632e-13	8.16e-12	39.48	10565.3	352711	318.37	ADAM9	CASP4	CD55	CEBPB	CPQ	DOCK10	DOCK9	DYRK2	GCA	LAMP2	PSEN1	RAF1	RASGRP1
HALLMARK_IL6_JAK_STAT3_SIGNALING	https://www.gsea-msigdb.org/gsea/msigdb/human/geneset/HALLMARK_IL6_JAK_STAT3_SIGNALING	4.64e-09	2.32e-07	12.32	1322.12	352711	318.37	CSF2RA	CSF3R	IFNGR2	IL10RB	IL13RA1	IL1R2	TLR2	TNFRSF1A
HALLMARK_PI3K_AKT_MTOR_SIGNALING	https://www.gsea-msigdb.org/gsea/msigdb/human/geneset/HALLMARK_PI3K_AKT_MTOR_SIGNALING	1.497e-06	7.485e-05	14.36	3151.03	352711	318.37	MKNK1	PLCG1	PTEN	RAF1	RALB	RIT1	SLA	TNFRSF1A
HALLMARK_IL2_STAT5_SIGNALING	https://www.gsea-msigdb.org/gsea/msigdb/human/geneset/HALLMARK_IL2_STAT5_SIGNALING	0.0002956	0.01478	23.64	11312.5	352711	318.37	CKAP4	DENND5A	IL1R2	KLF6	MXD1	NFIL3	PRKCH	RHOH	RORA	RRAGD	SLC2A3
REACTOME_NEUTROPHIL_DEGRANULATION	https://www.gsea-msigdb.org/gsea/msigdb/human/geneset/REACTOME_NEUTROPHIL_DEGRANULATION	4.282e-44	5.507e-41	101.32	39515.3	740842	358.94	ALOX5	ASAH1	BIN2	BST1	CD53	CD55	CKAP4	CMTM6	DNAJC3	FCAR	FCGR2A	GCA	LAMP2	MAPK14	PGM2	PSEN1	PYGL	QPCT	RAB31	SDCBP	SERPINB1	SLC11A1	SLC2A3	TLR2
REACTOME_SIGNALING_BY_INTERLEUKINS	https://www.gsea-msigdb.org/gsea/msigdb/human/geneset/REACTOME_SIGNALING_BY_INTERLEUKINS	3.086e-16	3.969e-13	32.91	10406.8	740842	358.94	ALOX5	BCL6	CEBPD	CRK	CSF2RA	CSF3R	GAB2	IL10RB	IL13RA1	IL1R2	IL1RAP	IL6R	IRAK3	IRS2	MAPK14	MCL1	N4BP1	PELI1	RORA	S1PR1	SOS2	STAT4	STX3	TNFRSF1A
REACTOME_INTERLEUKIN_4_AND_INTERLEUKIN_13_SIGNALING	https://www.gsea-msigdb.org/gsea/msigdb/human/geneset/REACTOME_INTERLEUKIN_4_AND_INTERLEUKIN_13_SIGNALING	3.317e-09	4.266e-06	10.58	1431.97	740842	358.94	ALOX5	BCL6	CEBPD	IL13RA1	IL6R	MCL1	RORA	S1PR1
REACTOME_SARS_COV_2_ACTIVATES_MODULATES_INNATE_AND_ADAPTIVE_IMMUNE_RESPONSES	https://www.gsea-msigdb.org/gsea/msigdb/human/geneset/REACTOME_SARS_COV_2_ACTIVATES_MODULATES_INNATE_AND_ADAPTIVE_IMMUNE_RESPONSES	4.848e-08	6.235e-05	13.83	3685.97	740842	358.94	NLRP12	NUP205	NUP214	TLR1	TLR2	TLR8	TRIM25
REACTOME_INTERLEUKIN_1_SIGNALING	https://www.gsea-msigdb.org/gsea/msigdb/human/geneset/REACTOME_INTERLEUKIN_1_SIGNALING	1.624e-07	0.0002088	6.35	477.02	740842	358.94	IL1R2	IL1RAP	IRAK3	N4BP1	PELI1
