# Supplementary material for: Blood cell ratio biomarkers of systemic inflammation in chronic obstructive pulmonary disease
Source: Respir Res. 2026 Mar 18;27:184. doi: 10.1186/s12931-026-03632-3 (PMC13113035; doi:10.1186/s12931-026-03632-3)
Supplement: Supplementary file 4 — Supplementary Material 4. [file 12931_2026_3632_MOESM4_ESM.xlsx]

## Sheet: Proteomic_NLR
e-Table 11: Proteomics pathway enrichment for NLR (P-adjusted<0.05)
pathwy.id	description	pvalues	Bonferroni	successes	PathwaySize	N	sample.size	GeneinPathway
GOBP_ANTIMICROBIAL_HUMORAL_IMMUNE_RESPONSE_MEDIATED_BY_ANTIMICROBIAL_PEPTIDE	https://www.gsea-msigdb.org/gsea/msigdb/human/geneset/GOBP_ANTIMICROBIAL_HUMORAL_IMMUNE_RESPONSE_MEDIATED_BY_ANTIMICROBIAL_PEPTIDE	5.463e-20	3.86e-16	14.72	850.02	624396	197.56	ANG	CAMP	CCL22	CCL23	CXCL13	ELANE	GNLY	KLK7	REG1A	REG1B	REG3A	RPS19	S100A12	S100A9
GOBP_EXTERNAL_ENCAPSULATING_STRUCTURE_ORGANIZATION	https://www.gsea-msigdb.org/gsea/msigdb/human/geneset/GOBP_EXTERNAL_ENCAPSULATING_STRUCTURE_ORGANIZATION	4.296e-07	0.003036	6.04	865.21	624396	197.56	ANXA2	APLP1	B4GALT1	BMP1	CCDC80	COL11A2	COL15A1	COL18A1	COMP	CRISPLD2	CST3	CTSV	DPT	ELANE	FAP	FMOD	GSN	KAZALD1	KLK7	LUM	MATN3	MATN4	MMP19	MMP8	MMP9	SPOCK2	TGFBI	TGFBR3	TNFRSF1A	TNFRSF1B
GOBP_TAXIS	https://www.gsea-msigdb.org/gsea/msigdb/human/geneset/GOBP_TAXIS	2.162e-06	0.01528	5.58	633.11	624396	197.56	C5	CCL22	CCL23	CSF1R	CXCL13	CXCL16	ELANE	ENPP2	EPHA2	EPHA7	GPNMB	KIT	L1CAM	LECT2	MAPK14	MSMP	PLAUR	ROBO2	RPS19	S100A12	S100A9	SAA1	SEMA3G	SEMA4D	THBS4	TNFAIP6	TREM1	WNT5A
GOCC_COLLAGEN_CONTAINING_EXTRACELLULAR_MATRIX	https://www.gsea-msigdb.org/gsea/msigdb/human/geneset/GOCC_COLLAGEN_CONTAINING_EXTRACELLULAR_MATRIX	1.449e-16	1.024e-12	16.48	2384.41	624396	197.56	A2M	ADIPOQ	AHSG	ANG	ANXA2	APLP1	ASPN	AZGP1	BGN	CBLN4	CCDC80	CDON	CILP	CLEC3B	COL11A2	COL15A1	COL18A1	COLEC12	COMP	DPT	EDIL3	ELANE	FGL1	FMOD	HDGF	HSP90AA1	ITIH4	ITIH5	KAZALD1	L1CAM	LUM	MATN3	MATN4	MMP8	MMP9	MYOC	PRTN3	S100A10	S100A9	SERPINA1	SERPINB1	SFRP1
GOCC_ENDOPLASMIC_RETICULUM_LUMEN	https://www.gsea-msigdb.org/gsea/msigdb/human/geneset/GOCC_ENDOPLASMIC_RETICULUM_LUMEN	4.292e-07	0.003033	7.19	1409.23	624396	197.56	AHSG	BCHE	CHGB	CNPY3	COL11A2	COL15A1	COL18A1	CST3	DNAJB9	F8	FSTL3	MATN3	NOTUM	PENK	PLAUR	SERPINA1	SUMF2	TNC	WNT5A
GOMF_LOW_DENSITY_LIPOPROTEIN_PARTICLE_RECEPTOR_ACTIVITY	https://www.gsea-msigdb.org/gsea/msigdb/human/geneset/GOMF_LOW_DENSITY_LIPOPROTEIN_PARTICLE_RECEPTOR_ACTIVITY	5.492e-06	0.03881	2.12	10.91	624396	197.56	CXCL16	LRP10	OLR1
HALLMARK_ALLOGRAFT_REJECTION	https://www.gsea-msigdb.org/gsea/msigdb/human/geneset/HALLMARK_ALLOGRAFT_REJECTION	4.173e-08	2.086e-06	44.25	10975.3	352711	563.99	CCL22	CRTAM	CXCL13	EGFR	ELANE	GZMA	IL27RA	INHBB	LY75	MMP9	RPS19	SRGN
HALLMARK_COAGULATION	https://www.gsea-msigdb.org/gsea/msigdb/human/geneset/HALLMARK_COAGULATION	0.0002837	0.01418	18.36	4330.9	352711	563.99	A2M	ANG	BMP1	C9	COMP	CTSV	F8	GSN	MMP8	MMP9	OLR1	S100A13	SERPINA1
HALLMARK_COMPLEMENT	https://www.gsea-msigdb.org/gsea/msigdb/human/geneset/HALLMARK_COMPLEMENT	2.892e-52	1.446e-50	107.02	10565.3	352711	563.99	ACTN2	ANG	C9	CPM	CR2	CTSV	F8	GCA	GZMA	GZMK	HSPA1A	MMP8	OLR1	PLAUR	PRCP	S100A12	S100A13	S100A9	SERPINA1	SPOCK2
HALLMARK_EPITHELIAL_MESENCHYMAL_TRANSITION	https://www.gsea-msigdb.org/gsea/msigdb/human/geneset/HALLMARK_EPITHELIAL_MESENCHYMAL_TRANSITION	1.284e-85	6.42e-84	144.88	11057.6	352711	563.99	APLP1	BGN	BMP1	CADM1	COMP	EDIL3	FAP	FMOD	FSTL3	IGFBP2	LUM	MATN3	NNMT	NTM	PLAUR	SFRP1	SFRP4	TAGLN	TGFBI	TGFBR3	TNC	WNT5A
HALLMARK_IL6_JAK_STAT3_SIGNALING	https://www.gsea-msigdb.org/gsea/msigdb/human/geneset/HALLMARK_IL6_JAK_STAT3_SIGNALING	1.258e-05	0.000629	11.02	1322.12	352711	563.99	A2M	CD14	CXCL13	HMOX1	PLA2G2A	REG1A	TNFRSF1A	TNFRSF1B
KEGG_MEDICUS_REFERENCE_GF_RTK_PI3K_SIGNALING_PATHWAY	https://www.gsea-msigdb.org/gsea/msigdb/human/geneset/KEGG_MEDICUS_REFERENCE_GF_RTK_PI3K_SIGNALING_PATHWAY	5.015e-08	1.906e-05	13.31	2162.75	23828.2	25.26	CSF1R	EGFR	EPHA2	FGF9	IGF1	KIT	NTRK2
KEGG_MEDICUS_REFERENCE_WNT_SIGNALING_MODULATION_WNT_INHIBITOR	https://www.gsea-msigdb.org/gsea/msigdb/human/geneset/KEGG_MEDICUS_REFERENCE_WNT_SIGNALING_MODULATION_WNT_INHIBITOR	1.633e-05	0.006205	4.68	147.5	23828.2	25.26	NOTUM	SFRP1	SFRP4	WNT5A
REACTOME_ANTIMICROBIAL_PEPTIDES	https://www.gsea-msigdb.org/gsea/msigdb/human/geneset/REACTOME_ANTIMICROBIAL_PEPTIDES	1.135e-06	0.00146	10.56	1722.92	740842	562.18	BPI	CAMP	ELANE	GNLY	LCN2	PLA2G2A	PRTN3	REG3A	S100A9
REACTOME_COLLAGEN_DEGRADATION	https://www.gsea-msigdb.org/gsea/msigdb/human/geneset/REACTOME_COLLAGEN_DEGRADATION	1.567e-05	0.02015	5.15	398.39	740842	562.18	COL11A2	COL15A1	COL18A1	ELANE	MMP19	MMP8	MMP9
REACTOME_ECM_PROTEOGLYCANS	https://www.gsea-msigdb.org/gsea/msigdb/human/geneset/REACTOME_ECM_PROTEOGLYCANS	3.866e-15	4.972e-12	13.14	613.03	740842	562.18	ASPN	BGN	COMP	FMOD	LUM	MATN3	MATN4	TNC
REACTOME_EXTRACELLULAR_MATRIX_ORGANIZATION	https://www.gsea-msigdb.org/gsea/msigdb/human/geneset/REACTOME_EXTRACELLULAR_MATRIX_ORGANIZATION	5.441e-10	6.997e-07	22.11	5496.96	740842	562.18	A2M	ASPN	BGN	BMP1	CEACAM8	COL11A2	COL15A1	COL18A1	COMP	CTSV	ELANE	FMOD	KLK7	LUM	MATN3	MATN4	MMP19	MMP8	MMP9	TNC
REACTOME_INTERLEUKIN_4_AND_INTERLEUKIN_13_SIGNALING	https://www.gsea-msigdb.org/gsea/msigdb/human/geneset/REACTOME_INTERLEUKIN_4_AND_INTERLEUKIN_13_SIGNALING	1.749e-05	0.02249	8.52	1431.97	740842	562.18	CCL22	FCER2	HMOX1	HSP90AA1	LCN2	MMP9	POMC	SAA1	TNFRSF1B	TP53
REACTOME_NEUTROPHIL_DEGRANULATION	https://www.gsea-msigdb.org/gsea/msigdb/human/geneset/REACTOME_NEUTROPHIL_DEGRANULATION	6.256e-82	8.045e-79	174.63	39515.3	740842	562.18	AHSG	ANXA2	B4GALT1	BPI	CAMP	CD14	CEACAM8	CLEC4C	CRISPLD2	CST3	ELANE	GCA	GPI	GSN	HSP90AA1	HSPA1A	HSPA1B	LCN2	MAPK14	MMP8	MMP9	MPO	NFASC	OLR1	PLAUR	PRCP	PRTN3	RETN	S100A12	S100A9	SDCBP	SERPINA1	SERPINB1	TCN1	TNFAIP6	TNFRSF1B
REACTOME_POST_TRANSLATIONAL_MODIFICATION_SYNTHESIS_OF_GPI_ANCHORED_PROTEINS	https://www.gsea-msigdb.org/gsea/msigdb/human/geneset/REACTOME_POST_TRANSLATIONAL_MODIFICATION_SYNTHESIS_OF_GPI_ANCHORED_PROTEINS	9.684e-09	1.245e-05	16.74	3314.72	740842	562.18	CNTN4	CPM	MDGA2	NTM	OPCML	PLAUR	VNN2
REACTOME_REGULATION_OF_INSULIN_LIKE_GROWTH_FACTOR_IGF_TRANSPORT_AND_UPTAKE_BY_INSULIN_LIKE_GROWTH_FACTOR_BINDING_PROTEINS_IGFBPS	https://www.gsea-msigdb.org/gsea/msigdb/human/geneset/REACTOME_REGULATION_OF_INSULIN_LIKE_GROWTH_FACTOR_IGF_TRANSPORT_AND_UPTAKE_BY_INSULIN_LIKE_GROWTH_FACTOR_BINDING_PROTEINS_IGFBPS	4.893e-20	6.292e-17	27.46	3086.57	740842	562.18	AHSG	CHGB	CST3	FSTL3	IGF1	IGFBP2	MATN3	NOTUM	PAPPA	PENK	SERPINA1	TNC
REACTOME_RESPONSE_TO_ELEVATED_PLATELET_CYTOSOLIC_CA2	https://www.gsea-msigdb.org/gsea/msigdb/human/geneset/REACTOME_RESPONSE_TO_ELEVATED_PLATELET_CYTOSOLIC_CA2	2.647e-12	3.404e-09	24.78	5037.9	740842	562.18	A2M	ACTN2	AHSG	CLEC3B	F8	IGF1	ITIH4	SERPINA1	SRGN	TTN
REACTOME_SIGNALING_BY_INTERLEUKINS	https://www.gsea-msigdb.org/gsea/msigdb/human/geneset/REACTOME_SIGNALING_BY_INTERLEUKINS	5.898e-13	7.585e-10	35.73	10406.8	740842	562.18	ANXA2	BLNK	CCL22	CSF1R	FCER2	HAVCR2	HMOX1	HSP90AA1	IL11RA	IL1RL1	IL1RN	IL22RA2	IL27RA	LCN2	MAPK14	MMP9	POMC	PRTN3	S100A12	SAA1	TALDO1	TNFRSF1A	TNFRSF1B	TP53
[truncated: 4 more columns]

## Sheet: Proteomic_PLR
e-Table 12: Proteomics pathway enrichment for PLR (P-adjusted<0.05)
pathwy.id	description	pvalues	Bonferroni	successes	PathwaySize	N	sample.size	GeneinPathway
GOBP_ANTIMICROBIAL_HUMORAL_IMMUNE_RESPONSE_MEDIATED_BY_ANTIMICROBIAL_PEPTIDE	https://www.gsea-msigdb.org/gsea/msigdb/human/geneset/GOBP_ANTIMICROBIAL_HUMORAL_IMMUNE_RESPONSE_MEDIATED_BY_ANTIMICROBIAL_PEPTIDE	5.654e-09	3.995e-05	7.68	850.02	624396	172.96	CCL22	CXCL11	DEFB1	GNLY	REG1A	RPL30	RPS19	S100A12
GOBP_TAXIS	https://www.gsea-msigdb.org/gsea/msigdb/human/geneset/GOBP_TAXIS	7.49e-10	5.292e-06	7.09	633.11	624396	172.96	C5	CCL22	CCL28	CRKL	CSF1R	CXCL11	DEFB1	ENPP2	IL16	L1CAM	LECT2	MAPK14	NOTCH1	RHOA	ROBO2	RPS19	S100A12	SAA1	SEMA3G	SEMA4D	SEMA6A	SEMA6B	SEMA7A	THBS4	TYMP	VCAM1	WNT5A
GOCC_COLLAGEN_CONTAINING_EXTRACELLULAR_MATRIX	https://www.gsea-msigdb.org/gsea/msigdb/human/geneset/GOCC_COLLAGEN_CONTAINING_EXTRACELLULAR_MATRIX	3.001e-08	0.0002121	9.6	2384.41	624396	172.96	A2M	ADIPOQ	AHSG	ANXA2	AZGP1	BGN	CBLN4	CLEC3B	COL15A1	CTSH	DPT	FBLN1	FGL1	HSP90AA1	ITIH4	ITIH5	KAZALD1	L1CAM	LGALS3BP	LUM	MATN4	MYOC	PLAT	S100A10	SEMA7A	SERPINA1	SERPINF1	SFRP1	TGFBI	THBS4	WNT5A
GOMF_PROTEIN_DISULFIDE_ISOMERASE_ACTIVITY	https://www.gsea-msigdb.org/gsea/msigdb/human/geneset/GOMF_PROTEIN_DISULFIDE_ISOMERASE_ACTIVITY	3.949e-06	0.0279	3.45	105.82	624396	172.96	ERP29	PDIA3	PDIA6	TMX3
HALLMARK_ALLOGRAFT_REJECTION	https://www.gsea-msigdb.org/gsea/msigdb/human/geneset/HALLMARK_ALLOGRAFT_REJECTION	1.253e-21	6.265e-20	64.07	10975.3	352711	493.25	CCL22	CD8A	CRTAM	EIF3J	GZMA	IL16	IL27RA	IL9	INHBB	LY75	RPS19	RPS3A	SRGN
HALLMARK_COAGULATION	https://www.gsea-msigdb.org/gsea/msigdb/human/geneset/HALLMARK_COAGULATION	2.189e-10	1.094e-08	27.71	4330.9	352711	493.25	A2M	ARF4	BMP1	C9	CFD	CPB2	CTSH	GP1BA	MMP1	PLAT	S100A13	SERPINA1
HALLMARK_COMPLEMENT	https://www.gsea-msigdb.org/gsea/msigdb/human/geneset/HALLMARK_COMPLEMENT	3.369e-17	1.684e-15	56.98	10565.3	352711	493.25	C9	CPM	CR1	CR2	CTSH	GP1BA	GZMA	GZMK	PLAT	PRCP	S100A12	S100A13	SERPINA1	SPOCK2
HALLMARK_EPITHELIAL_MESENCHYMAL_TRANSITION	https://www.gsea-msigdb.org/gsea/msigdb/human/geneset/HALLMARK_EPITHELIAL_MESENCHYMAL_TRANSITION	7.638e-19	3.819e-17	60.39	11057.6	352711	493.25	BGN	BMP1	CADM1	FAP	FBLN1	IGFBP2	IGFBP3	LUM	MMP1	NTM	SFRP1	SFRP4	TGFBI	TGFBR3	VCAM1	WNT5A
HALLMARK_MYC_TARGETS_V1	https://www.gsea-msigdb.org/gsea/msigdb/human/geneset/HALLMARK_MYC_TARGETS_V1	6.61e-08	3.305e-06	44.2	12806.8	352711	493.25	APEX1	EIF3J	EIF4G2	HDAC2	HNRNPA2B1	HNRNPD	HSP90AB1	PABPC4	RPS3	RPS5	SNRPB2
KEGG_MEDICUS_REFERENCE_GLYCOLYSIS	https://www.gsea-msigdb.org/gsea/msigdb/human/geneset/KEGG_MEDICUS_REFERENCE_GLYCOLYSIS	7.452e-06	0.002832	6	300	23828.2	37.86	ALDOA	LDHB	PGAM1	PGAM2
KEGG_MEDICUS_REFERENCE_TRANSLATION_INITIATION	https://www.gsea-msigdb.org/gsea/msigdb/human/geneset/KEGG_MEDICUS_REFERENCE_TRANSLATION_INITIATION	5.315e-05	0.0202	15	3172.64	23828.2	37.86	RPL30	RPS19	RPS3	RPS3A	RPS4X	RPS5
REACTOME_COMPLEMENT_CASCADE	https://www.gsea-msigdb.org/gsea/msigdb/human/geneset/REACTOME_COMPLEMENT_CASCADE	3.39e-06	0.00436	8.73	1378.14	740842	465.48	C5	C9	CFD	CPB2	CR1	CR2	IGKV1-5
REACTOME_GLUCONEOGENESIS	https://www.gsea-msigdb.org/gsea/msigdb/human/geneset/REACTOME_GLUCONEOGENESIS	3.53e-08	4.54e-05	6	283.5	740842	465.48	ALDOA	FBP1	PGAM1	PGAM2
REACTOME_GPVI_MEDIATED_ACTIVATION_CASCADE	https://www.gsea-msigdb.org/gsea/msigdb/human/geneset/REACTOME_GPVI_MEDIATED_ACTIVATION_CASCADE	2.453e-07	0.0003155	4.56	81.08	740842	465.48	CLEC1B	GP6	MPIG6B	RHOA
REACTOME_OTHER_SEMAPHORIN_INTERACTIONS	https://www.gsea-msigdb.org/gsea/msigdb/human/geneset/REACTOME_OTHER_SEMAPHORIN_INTERACTIONS	7.934e-09	1.02e-05	5.01	102.82	740842	465.48	PLXNC1	SEMA4D	SEMA6A	SEMA7A
REACTOME_PLATELET_ACTIVATION_SIGNALING_AND_AGGREGATION	https://www.gsea-msigdb.org/gsea/msigdb/human/geneset/REACTOME_PLATELET_ACTIVATION_SIGNALING_AND_AGGREGATION	9.795e-30	1.26e-26	34.44	3329.11	740842	465.48	A2M	AHSG	ALDOA	ARRB1	CFD	CFL1	CLEC1B	CLEC3B	EGF	GP1BA	GP6	IGF1	IGF2	ITIH3	ITIH4	LGALS3BP	MANF	MAPK14	MPIG6B	PTPN1	RHOA	SERPINA1	SHC1	SRGN	TMX3
REACTOME_REGULATION_OF_INSULIN_LIKE_GROWTH_FACTOR_IGF_TRANSPORT_AND_UPTAKE_BY_INSULIN_LIKE_GROWTH_FACTOR_BINDING_PROTEINS_IGFBPS	https://www.gsea-msigdb.org/gsea/msigdb/human/geneset/REACTOME_REGULATION_OF_INSULIN_LIKE_GROWTH_FACTOR_IGF_TRANSPORT_AND_UPTAKE_BY_INSULIN_LIKE_GROWTH_FACTOR_BINDING_PROTEINS_IGFBPS	8.006e-20	1.03e-16	25.16	3086.57	740842	465.48	AHSG	CHGB	IGF1	IGF2	IGFBP1	IGFBP2	IGFBP3	MMP1	PAPPA	PDIA6	PENK	SERPINA1
REACTOME_RESPONSE_TO_ELEVATED_PLATELET_CYTOSOLIC_CA2	https://www.gsea-msigdb.org/gsea/msigdb/human/geneset/REACTOME_RESPONSE_TO_ELEVATED_PLATELET_CYTOSOLIC_CA2	4.286e-87	5.512e-84	82.23	5037.9	740842	465.48	A2M	AHSG	ALDOA	CFD	CFL1	CLEC3B	EGF	IGF1	IGF2	ITIH3	ITIH4	LGALS3BP	MANF	SERPINA1	SRGN	TMX3
REACTOME_SIGNAL_ATTENUATION	https://www.gsea-msigdb.org/gsea/msigdb/human/geneset/REACTOME_SIGNAL_ATTENUATION	8.238e-06	0.01059	2.04	7.29	740842	465.48	GRB10	INSR	SHC1
REACTOME_SIGNALING_BY_INTERLEUKINS	https://www.gsea-msigdb.org/gsea/msigdb/human/geneset/REACTOME_SIGNALING_BY_INTERLEUKINS	2.372e-19	3.05e-16	40.17	10406.8	740842	465.48	ANXA2	BLNK	CCL22	CFL1	CRKL	CSF1R	FCER2	HNRNPA2B1	HSP90AA1	IL11RA	IL16	IL1RL1	IL22RA2	IL27RA	IL3RA	IL9	MAPK10	MAPK14	MMP1	S100A12	SAA1	SHC1	VCAM1

## Sheet: Proteomic_SII
e-Table 13: Proteomics pathway enrichment for SII (P-adjusted<0.05)
pathwy.id	description	pvalues	Bonferroni	successes	PathwaySize	N	sample.size	GeneinPathway
GOBP_EXTERNAL_ENCAPSULATING_STRUCTURE_ORGANIZATION	https://www.gsea-msigdb.org/gsea/msigdb/human/geneset/GOBP_EXTERNAL_ENCAPSULATING_STRUCTURE_ORGANIZATION	4.049e-07	0.002861	6.22	865.21	624396	196.05	ANXA2	APLP1	CCDC80	COL11A2	COL15A1	COL18A1	COMP	CPB2	CRISPLD2	DPT	EGFLAM	ELANE	FAP	FBLN1	FMOD	GSN	KAZALD1	KLK7	LARGE1	LUM	MATN4	MFAP4	MMP19	MMP8	MMP9	NOTCH1	SPINK5	SPOCK2	TGFBI	TNFRSF1A	TNXB	TPSAB1
GOBP_POSITIVE_REGULATION_OF_CELL_SUBSTRATE_ADHESION	https://www.gsea-msigdb.org/gsea/msigdb/human/geneset/GOBP_POSITIVE_REGULATION_OF_CELL_SUBSTRATE_ADHESION	3.669e-08	0.0002593	5.01	279.34	624396	196.05	CCDC80	CRKL	EDIL3	EGFLAM	MYOC	S100A10	SFRP1	SPOCK2
GOBP_TAXIS	https://www.gsea-msigdb.org/gsea/msigdb/human/geneset/GOBP_TAXIS	6.562e-08	0.0004637	6.36	633.11	624396	196.05	ADGRE2	BMP4	C5	CCL22	CRKL	CSF1R	CXCL13	EFNA5	ELANE	ENPP2	EPHA7	FGFR1	GPNMB	KIT	L1CAM	LECT2	MAPK14	NOTCH1	NTRK3	PLAU	RHOA	RHOG	ROBO1	ROBO2	S100A12	S100A9	SAA1	SEMA3G	SEMA4B	SEMA4D	SEMA7A	SLIT2	THBS4	TREM1
GOCC_COLLAGEN_CONTAINING_EXTRACELLULAR_MATRIX	https://www.gsea-msigdb.org/gsea/msigdb/human/geneset/GOCC_COLLAGEN_CONTAINING_EXTRACELLULAR_MATRIX	6.659e-21	4.705e-17	19.89	2384.41	624396	196.05	A2M	AHSG	ANXA2	APLP1	ASPN	AZGP1	BGN	CBLN4	CCDC80	CDON	CILP	CLEC3B	COL11A2	COL15A1	COL18A1	COMP	DPT	EDIL3	EFNA5	EGFLAM	ELANE	FBLN1	FGL1	FGL2	FMOD	HDGF	HSP90AA1	IGFBP7	ITIH5	KAZALD1	L1CAM	LTBP4	LUM	MATN4	MFAP4	MMP8	MMP9	MYOC	PRTN3	S100A10	S100A9	SEMA7A
HALLMARK_ALLOGRAFT_REJECTION	https://www.gsea-msigdb.org/gsea/msigdb/human/geneset/HALLMARK_ALLOGRAFT_REJECTION	1.516e-11	7.58e-10	42.79	10975.3	352711	402.7	CCL22	CRTAM	CXCL13	EGFR	ELANE	GZMA	IL27RA	IL2RB	INHBB	LY75	MMP9	SRGN	TIMP1
HALLMARK_APICAL_JUNCTION	https://www.gsea-msigdb.org/gsea/msigdb/human/geneset/HALLMARK_APICAL_JUNCTION	3.024e-07	1.512e-05	39.52	13830.2	352711	402.7	ADAM23	CNTN1	EGFR	MAPK14	MMP9	NFASC	NLGN2	SHC1	SLIT2	TGFBI	THBS3	YWHAH
HALLMARK_COAGULATION	https://www.gsea-msigdb.org/gsea/msigdb/human/geneset/HALLMARK_COAGULATION	2.183e-07	1.092e-05	20.13	4330.9	352711	402.7	A2M	C9	COMP	CPB2	GP1BA	GSN	MMP8	MMP9	OLR1	PLAU	SERPINA1	TIMP1
HALLMARK_COMPLEMENT	https://www.gsea-msigdb.org/gsea/msigdb/human/geneset/HALLMARK_COMPLEMENT	4.001e-15	2.001e-13	47.19	10565.3	352711	402.7	C9	CPM	CR2	GP1BA	GZMA	GZMK	MMP8	OLR1	RHOG	S100A12	S100A9	SERPINA1	SPOCK2	TIMP1
HALLMARK_EPITHELIAL_MESENCHYMAL_TRANSITION	https://www.gsea-msigdb.org/gsea/msigdb/human/geneset/HALLMARK_EPITHELIAL_MESENCHYMAL_TRANSITION	1.026e-32	5.13e-31	72.48	11057.6	352711	402.7	APLP1	BGN	CADM1	COMP	EDIL3	FAP	FBLN1	FMOD	IGFBP2	LUM	NTM	SFRP1	SFRP4	SLIT2	TGFBI	TIMP1
HALLMARK_IL2_STAT5_SIGNALING	https://www.gsea-msigdb.org/gsea/msigdb/human/geneset/HALLMARK_IL2_STAT5_SIGNALING	5.085e-08	2.542e-06	36.44	11312.5	352711	402.7	ALCAM	APLP1	CD48	CST7	FGL2	GABARAPL1	IL1RL1	IL2RB	IL3RA	ITIH5	PENK	SELP
KEGG_MEDICUS_REFERENCE_GF_RTK_PI3K_SIGNALING_PATHWAY	https://www.gsea-msigdb.org/gsea/msigdb/human/geneset/KEGG_MEDICUS_REFERENCE_GF_RTK_PI3K_SIGNALING_PATHWAY	9.362e-06	0.003558	9.19	2162.75	23828.2	17.97	CSF1R	EFNA5	EGFR	FGFR1	KIT	NTRK2
REACTOME_ACTIVATION_OF_MATRIX_METALLOPROTEINASES	https://www.gsea-msigdb.org/gsea/msigdb/human/geneset/REACTOME_ACTIVATION_OF_MATRIX_METALLOPROTEINASES	9.393e-07	0.001208	5.04	232.84	740842	536.99	COL18A1	ELANE	MMP8	MMP9	TIMP1	TPSAB1
REACTOME_CELL_SURFACE_INTERACTIONS_AT_THE_VASCULAR_WALL	https://www.gsea-msigdb.org/gsea/msigdb/human/geneset/REACTOME_CELL_SURFACE_INTERACTIONS_AT_THE_VASCULAR_WALL	1.207e-07	0.0001552	16.87	4183.3	740842	536.99	ATP1B2	CD48	CEACAM8	GP6	IGLL1	L1CAM	OLR1	SELP	SHC1	TREM1
REACTOME_COLLAGEN_DEGRADATION	https://www.gsea-msigdb.org/gsea/msigdb/human/geneset/REACTOME_COLLAGEN_DEGRADATION	1.261e-05	0.01622	5.15	398.39	740842	536.99	COL11A2	COL15A1	COL18A1	ELANE	MMP19	MMP8	MMP9
REACTOME_CONSTITUTIVE_SIGNALING_BY_ABERRANT_PI3K_IN_CANCER	https://www.gsea-msigdb.org/gsea/msigdb/human/geneset/REACTOME_CONSTITUTIVE_SIGNALING_BY_ABERRANT_PI3K_IN_CANCER	7.676e-09	9.871e-06	9.8	766.64	740842	536.99	EGFR	FGFR1	KIT	KL	NTRK2	NTRK3	RHOG
REACTOME_DEGRADATION_OF_THE_EXTRACELLULAR_MATRIX	https://www.gsea-msigdb.org/gsea/msigdb/human/geneset/REACTOME_DEGRADATION_OF_THE_EXTRACELLULAR_MATRIX	4.757e-08	6.118e-05	13.53	2450.01	740842	536.99	A2M	CAPNS1	COL11A2	COL15A1	COL18A1	ELANE	KLK7	MMP19	MMP8	MMP9	TIMP1	TPSAB1
REACTOME_ECM_PROTEOGLYCANS	https://www.gsea-msigdb.org/gsea/msigdb/human/geneset/REACTOME_ECM_PROTEOGLYCANS	4.781e-11	6.148e-08	10.91	613.03	740842	536.99	ASPN	BGN	COMP	FMOD	LUM	MATN4	TNXB
REACTOME_EXTRACELLULAR_MATRIX_ORGANIZATION	https://www.gsea-msigdb.org/gsea/msigdb/human/geneset/REACTOME_EXTRACELLULAR_MATRIX_ORGANIZATION	5.428e-29	6.98e-26	42.05	5496.96	740842	536.99	A2M	ASPN	BGN	BMP4	CAPNS1	CEACAM8	COL11A2	COL15A1	COL18A1	COMP	ELANE	FBLN1	FMOD	KLK7	LTBP4	LUM	MATN4	MFAP4	MMP19	MMP8	MMP9	TIMP1	TNXB	TPSAB1
REACTOME_L1CAM_INTERACTIONS	https://www.gsea-msigdb.org/gsea/msigdb/human/geneset/REACTOME_L1CAM_INTERACTIONS	4.134e-08	5.316e-05	9.53	935.39	740842	536.99	ALCAM	CNTN1	CNTN2	EGFR	EPHB2	FGFR1	L1CAM	NFASC	NRCAM
REACTOME_MOLECULES_ASSOCIATED_WITH_ELASTIC_FIBRES	https://www.gsea-msigdb.org/gsea/msigdb/human/geneset/REACTOME_MOLECULES_ASSOCIATED_WITH_ELASTIC_FIBRES	1.949e-05	0.02506	5.25	436.3	740842	536.99	BMP4	FBLN1	LTBP4	MFAP4
REACTOME_NEUTROPHIL_DEGRANULATION	https://www.gsea-msigdb.org/gsea/msigdb/human/geneset/REACTOME_NEUTROPHIL_DEGRANULATION	5.939e-49	7.638e-46	131.06	39515.3	740842	536.99	ADGRE5	AHSG	ANXA2	BPI	CAB39	CAMP	CEACAM8	CLEC4C	CRISPLD2	ELANE	FGL2	GPI	GSN	HPSE	HSP90AA1	HSP90AB1	LCN2	MAPK14	MMP8	MMP9	NFASC	OLR1	PLAU	PRTN3	RETN	RHOA	RHOG	S100A12	S100A9	SERPINA1	SERPINB1	TCN1
REACTOME_POST_TRANSLATIONAL_MODIFICATION_SYNTHESIS_OF_GPI_ANCHORED_PROTEINS	https://www.gsea-msigdb.org/gsea/msigdb/human/geneset/REACTOME_POST_TRANSLATIONAL_MODIFICATION_SYNTHESIS_OF_GPI_ANCHORED_PROTEINS	8.958e-11	1.152e-07	18.72	3314.72	740842	536.99	CNTN4	CPM	LSAMP	MDGA2	NTM	OPCML	VNN2
REACTOME_REGULATION_OF_INSULIN_LIKE_GROWTH_FACTOR_IGF_TRANSPORT_AND_UPTAKE_BY_INSULIN_LIKE_GROWTH_FACTOR_BINDING_PROTEINS_IGFBPS	https://www.gsea-msigdb.org/gsea/msigdb/human/geneset/REACTOME_REGULATION_OF_INSULIN_LIKE_GROWTH_FACTOR_IGF_TRANSPORT_AND_UPTAKE_BY_INSULIN_LIKE_GROWTH_FACTOR_BINDING_PROTEINS_IGFBPS	5.888e-24	7.572e-21	30.98	3086.57	740842	536.99	AHSG	BMP4	CHGB	IGFBP2	IGFBP7	NOTUM	PAPPA	PDIA6	PENK	SERPINA1	TIMP1	TMEM132A
REACTOME_RESPONSE_TO_ELEVATED_PLATELET_CYTOSOLIC_CA2	https://www.gsea-msigdb.org/gsea/msigdb/human/geneset/REACTOME_RESPONSE_TO_ELEVATED_PLATELET_CYTOSOLIC_CA2	1.893e-14	2.434e-11	26.13	5037.9	740842	536.99	A2M	AHSG	CLEC3B	MANF	SELP	SERPINA1	SERPINA4	SRGN	TIMP1
REACTOME_SIGNALING_BY_INTERLEUKINS	https://www.gsea-msigdb.org/gsea/msigdb/human/geneset/REACTOME_SIGNALING_BY_INTERLEUKINS	5.812e-09	7.474e-06	28.37	10406.8	740842	536.99	ANXA2	CCL22	CRKL	CSF1R	FCER2	HSP90AA1	IL11RA	IL1RL1	IL22RA2	IL27RA	IL2RB	IL3RA	LCN2	MAPK10	MAPK14	MMP9	PRTN3	S100A12	SAA1	SHC1	TIMP1	TNFRSF1A
[truncated: 9 more columns]
